# Supplementary material for: Sequencing, assembly, and genomic annotation of Leucoagaricus gongylophorus LEU18496, a dikarya mutualistic species
Source: Royal Society of Chemistry journal article supplement (doi:10.1039/d4mo00108g), 2024-08-20
Supplement: d4mo00108g1.xlsx [file d4mo00108g1.xlsx]

## Sheet: S1
Table S1: GenomeScope metrics obtained for both Leucoagaricus analyzed
	L. gongylophorus LEU18496		L. gongylophorus Ac12
Property	min	max	min	max
Homozygous (aa)	0.9832	0.9839	0.9756	0.9762
Heterozygous (ab)	0.0161	0.0168	0.0238	0.0244
Genome Haploid Length	83,241,214 bp	83,955,546 bp	110,032,748 bp	111,013,756 bp
Genome Repeat Length	31,824,245 bp	32,097,343 bp	49,205,491 bp	49,644,187 bp
Genome Unique Length	51,416,970 bp	51,858,203 bp	60,827,258 bp	61,369,569 bp
Model Fit	0.6507	0.9345	0.5996	0.9026
Read Error Rate	0.0072	0.0072	0.0011	0.0011

## Sheet: S2
Table S2: Comparison of L. gongylophorus LEU18496 and L. gongylophorus Ac12 9 genome assemblies.
Statistics	L. gongylophorus LEU18496	L. gongylophorus Ac12
# contigs	39153	83777
# contigs (>= 0 bp)	39153	83777
# contigs (>= 1000 bp)	19774	28824
Largest contig	133005	100988
Total length	125405899	100245223
Total length (>= 0 bp)	125405899	100245223
Total length (>= 1000 bp)	116750005	70366142
N50	8567	1828
N90	1524	523
auN	12094	3142.3
L50	3937	13563
L90	16644	56278
GC (%)	36.32	35.11
Mismatches
# N's per 100 kbp	0	0.44
# N's	0	446

## Sheet: S3
Table S3 : OcculterCut metrics obtained for both genomic assemblies.
	L. gongylophorus LEU18496	L. gongylophorus Ac12
Genome_size(Mbp)	125	100
N50	3937	13563
L50_(kbp)	8.57	1.83
Number_of_scaffolds	39153	83777
1st Cauchy distribution
Weight	0.76	0.789
Peak position	32.9	31.6
2nd Cauchy distribution
Weight	0.24	0.211
Peak position	45.3	45.9
Region R0
Interval_(%GC)	40.8->100	0->41
GC_peak_(%GC)	32.9	31.6
Proportion_of_genome	73.9	76.7
Number_of_region	26995(135)	67959(11)
Average_length_kbp	3.43(6.43)	1.13(2.3)
St_dev_length_kbp	4.95(6.39)	1.23(2.98)
Number_of_genes	476(476)	112(4)
Gene_density(genes/Mbp)	5.14(5.14)	1.46(0.052)
Region R1
Interval_(%GC)	40.8->100	41->100
GC_peak_(%GC)	45.3	45.9
Proportion_of_genome	26.1	23.3
Number_of_region	14976(531)	16552(39)
Average_length_kbp	2.18(4.48)	1.41(4.76)
St_dev_length_kbp	3.88(3.63)	2.09(3.3)
Number_of_genes	6272(6269)	4742(120)
Gene_density(genes/Mbp)	192(192)	203(5.14)

## Sheet: S4
Table S4: Functional annotation of the predicted genes in terms of GO annotation and BLASTp with proteins from the NCBI database.
SeqName	Description	#Hits	e-Value	sim mean	#GO	GO IDs	GO Names	Enzyme Codes	Enzyme Names
g1.t1	KAF5355170.1hypothetical protein D9756_005697	3	7.36e-258	85.17	9	P:GO:0006508; P:GO:0030154; P:GO:0043936; F:GO:0004252; F:GO:0019863; C:GO:0005622; C:GO:0110165	P:proteolysis; P:cell differentiation; P:asexual sporulation resulting in formation of a cellular spore; F:serine-type endopeptidase activity; F:IgE binding; C:intracellular anatomical structure; C:cellular anatomical entity	EC:3.4.21	Acting on peptide bonds (peptidases)
g2.t1	KXN90361.1putative 5'-nucleotidase	3	8.31e-117	56.15	4	P:GO:0009166; F:GO:0000166; F:GO:0003824; F:GO:0016787	P:nucleotide catabolic process; F:nucleotide binding; F:catalytic activity; F:hydrolase activity	EC:3.1.3.5	5'-nucleotidase
g3.t1	KXN83390.1hypothetical protein AN958_01527	3	3.71e-72	82.34
g4.t1	KAF5355100.1hypothetical protein D9756_005777	3	1.75e-138	89.63	2	F:GO:0010997; F:GO:0097027	F:anaphase-promoting complex binding; F:ubiquitin-protein transferase activator activity
g5.t1	KAG2019611.1vegetative incompatibility protein HET-E-1	3	4.7e-76	51.02	2	P:GO:0006508; F:GO:0008233	P:proteolysis; F:peptidase activity
g6.t1	KAF5357968.1hypothetical protein D9756_001536	3	0	87.02	8	P:GO:0005975; F:GO:0016787; F:GO:0047657; C:GO:0016020	P:carbohydrate metabolic process; F:hydrolase activity; F:alpha-1,3-glucan synthase activity; C:membrane	EC:2.4.1.183; EC:3	alpha-1,3-glucan synthase; Hydrolases
g7.t1	KAF5358343.1hypothetical protein D9756_001541	3	0	65.06	23	P:GO:0000196; P:GO:0001402; P:GO:0001403; P:GO:0007124; P:GO:0007186; P:GO:0007232; P:GO:0007346; P:GO:0010514; P:GO:0022603; P:GO:0032147; P:GO:0034307; P:GO:0034605; P:GO:0042981; P:GO:0043406; P:GO:0044703; P:GO:0071507; P:GO:2000243; F:GO:0004709; F:GO:0032093; C:GO:0000935; C:GO:0005737; C:GO:0005886; C:GO:0051286	P:cell wall integrity MAPK cascade; P:signal transduction involved in filamentous growth; P:invasive growth in response to glucose limitation; P:pseudohyphal growth; P:G protein-coupled receptor signaling pathway; P:osmosensory signaling pathway via Sho1 osmosensor; P:regulation of mitotic cell cycle; P:induction of conjugation with cellular fusion; P:regulation of anatomical structure morphogene…	EC:2.7.11.25; EC:2.7.11.1	mitogen-activated protein kinase kinase kinase; non-specific serine/threonine protein kinase
g8.t1	KAF5358340.1hypothetical protein D9756_001542	3	1.02e-91	74.18	7	P:GO:0002940; P:GO:0008152; F:GO:0008170; F:GO:0016423; F:GO:0016740; C:GO:0005637; C:GO:0005739	P:tRNA N2-guanine methylation; P:metabolic process; F:N-methyltransferase activity; F:tRNA (guanine) methyltransferase activity; F:transferase activity; C:nuclear inner membrane; C:mitochondrion	EC:2.1.1	Transferring one-carbon groups
g9.t1	KAF5358346.1hypothetical protein D9756_001544	3	1.38e-29	82.93	11	P:GO:0006825; P:GO:0006878; P:GO:0006879; P:GO:0015680; P:GO:0034599; P:GO:0046907; P:GO:0065008; F:GO:0005507; F:GO:0016531; F:GO:0046872; C:GO:0005829	P:copper ion transport; P:intracellular copper ion homeostasis; P:intracellular iron ion homeostasis; P:protein maturation by copper ion transfer; P:cellular response to oxidative stress; P:intracellular transport; P:regulation of biological quality; F:copper ion binding; F:copper chaperone activity; F:metal ion binding; C:cytosol
g10.t1	KAF9454518.1hypothetical protein P691DRAFT_806694	3	2.63e-171	76.71	4	P:GO:0045292; F:GO:0003729; F:GO:1901363; C:GO:1990904	P:mRNA cis splicing, via spliceosome; F:mRNA binding; F:heterocyclic compound binding; C:ribonucleoprotein complex
g11.t1	KAF5358348.1hypothetical protein D9756_001548	3	1.09e-147	81.58	2	F:GO:0004672; F:GO:0005524	F:protein kinase activity; F:ATP binding
g12.t1	KAF5358349.1hypothetical protein D9756_001549	3	3.8e-85	83.14	2	F:GO:0003723	F:RNA binding
g13.t1	KAF5357930.1hypothetical protein D9756_001550	3	6.01e-134	91.15	3	P:GO:0006366; F:GO:0046982; C:GO:0005634	P:transcription by RNA polymerase II; F:protein heterodimerization activity; C:nucleus
g14.t1	KAF5358295.1hypothetical protein D9756_001552	3	7.85e-110	79.55	6	P:GO:0016310; F:GO:0016301; F:GO:0046872	P:phosphorylation; F:kinase activity; F:metal ion binding	EC:2.7	Transferring phosphorus-containing groups
g15.t1	KAF5357927.1hypothetical protein D9756_001554	3	8.38e-170	59.27	13	P:GO:0006886; P:GO:0006891; P:GO:0006893; P:GO:0015833; P:GO:0034498; P:GO:0043087; P:GO:0061796; C:GO:0005769; C:GO:0005801; C:GO:0005802; C:GO:0032154; C:GO:0035838; C:GO:1990071	P:intracellular protein transport; P:intra-Golgi vesicle-mediated transport; P:Golgi to plasma membrane transport; P:peptide transport; P:early endosome to Golgi transport; P:regulation of GTPase activity; P:membrane addition at site of mitotic cytokinesis; C:early endosome; C:cis-Golgi network; C:trans-Golgi network; C:cleavage furrow; C:growing cell tip; C:TRAPPII protein complex
g16.t1	KAF5358294.1hypothetical protein D9756_001556	3	0	80.51	22	P:GO:0000073; P:GO:0007018; P:GO:0007019; P:GO:0030543; P:GO:0051228; P:GO:0051256; P:GO:0099606; F:GO:0003777; F:GO:0005200; F:GO:0005524; F:GO:0008017; F:GO:0008574; F:GO:0016887; C:GO:0000776; C:GO:0000794; C:GO:0005871; C:GO:0005876; C:GO:0044732; C:GO:0072687; C:GO:1990023	P:initial mitotic spindle pole body separation; P:microtubule-based movement; P:microtubule depolymerization; P:2-micrometer plasmid partitioning; P:mitotic spindle disassembly; P:mitotic spindle midzone assembly; P:microtubule plus-end directed mitotic chromosome migration; F:microtubule motor activity; F:structural constituent of cytoskeleton; F:ATP binding; F:microtubule binding; F:plus-end-di…	EC:5.6.1.3; EC:3.6.1.15	plus-end-directed kinesin ATPase; nucleoside-triphosphate phosphatase
g17.t1	KAF5358161.1hypothetical protein D9756_001558	3	0	95.1	18	P:GO:0000301; P:GO:0006886; P:GO:0006887; P:GO:0007018; P:GO:0010970; P:GO:0015833; P:GO:0051128; P:GO:0071963; F:GO:0003777; F:GO:0005524; F:GO:0008017; F:GO:0008574; F:GO:0016887; F:GO:0099609; C:GO:0005856; C:GO:0005871; C:GO:0005881	P:retrograde transport, vesicle recycling within Golgi; P:intracellular protein transport; P:exocytosis; P:microtubule-based movement; P:transport along microtubule; P:peptide transport; P:regulation of cellular component organization; P:establishment or maintenance of cell polarity regulating cell shape; F:microtubule motor activity; F:ATP binding; F:microtubule binding; F:plus-end-directed micr…	EC:5.6.1.3; EC:3.6.1.15	plus-end-directed kinesin ATPase; nucleoside-triphosphate phosphatase
g18.t1	XP_006458112.1hypothetical protein AGABI2DRAFT_199387	3	2.55e-178	73.97	8	P:GO:0000288; P:GO:0007005; P:GO:0008298; P:GO:0009060; P:GO:0051646; F:GO:0003729; F:GO:1901363; C:GO:0032473	P:nuclear-transcribed mRNA catabolic process, deadenylation-dependent decay; P:mitochondrion organization; P:intracellular mRNA localization; P:aerobic respiration; P:mitochondrion localization; F:mRNA binding; F:heterocyclic compound binding; C:cytoplasmic side of mitochondrial outer membrane
g19.t1	KAF5357791.1hypothetical protein D9756_001559	3	0	73.05	3	P:GO:0006810; P:GO:0051641; C:GO:0005783	P:transport; P:cellular localization; C:endoplasmic reticulum
g20.t1	KAF5358315.1hypothetical protein D9756_001560	3	1.27e-154	84.3	6	P:GO:0018193; P:GO:0018279; P:GO:0035269; F:GO:0004579; C:GO:0008250; C:GO:0016020	P:peptidyl-amino acid modification; P:protein N-linked glycosylation via asparagine; P:protein O-linked mannosylation; F:dolichyl-diphosphooligosaccharide-protein glycotransferase activity; C:oligosaccharyltransferase complex; C:membrane	EC:2.4.99.18; EC:2.4.1	dolichyl-diphosphooligosaccharide--protein glycotransferase; Glycosyltransferases
g21.t1	KAJ3562370.1hypothetical protein NP233_g9613	3	0	80.92	12	P:GO:0016310; P:GO:0044011; P:GO:0046834; P:GO:0046854; P:GO:0048015; F:GO:0004430; F:GO:0016301; C:GO:0005634; C:GO:0005802; C:GO:0016020	P:phosphorylation; P:single-species biofilm formation on inanimate substrate; P:lipid phosphorylation; P:phosphatidylinositol phosphate biosynthetic process; P:phosphatidylinositol-mediated signaling; F:1-phosphatidylinositol 4-kinase activity; F:kinase activity; C:nucleus; C:trans-Golgi network; C:membrane	EC:2.7.1.67	1-phosphatidylinositol 4-kinase
g22.t1	KAJ3562371.1hypothetical protein NP233_g9614	3	6.37e-87	88.14	1	F:GO:0016740	F:transferase activity	EC:2	Transferases
g23.t1	KAF5358317.1hypothetical protein D9756_001562	3	5.77e-139	85.2	4	F:GO:0000030; C:GO:0016020	F:mannosyltransferase activity; C:membrane	EC:2.4.1	Glycosyltransferases
g24.t1	KAF5358318.1hypothetical protein D9756_001563	3	2.6e-205	88.95	15	P:GO:0015833; P:GO:0017038; P:GO:0030150; P:GO:0045039; P:GO:0065002; F:GO:0008320; F:GO:0015288; F:GO:0015450; F:GO:1904680; C:GO:0005741; C:GO:0005742; C:GO:0046930	P:peptide transport; P:protein import; P:protein import into mitochondrial matrix; P:protein insertion into mitochondrial inner membrane; P:intracellular protein transmembrane transport; F:protein transmembrane transporter activity; F:porin activity; F:protein-transporting ATPase activity; F:peptide transmembrane transporter activity; C:mitochondrial outer membrane; C:mitochondrial outer membrane…	EC:7.2.2	Catalysing the translocation of inorganic cations
g25.t1	KAF5358312.1hypothetical protein D9756_001565	3	2.4e-172	76.53	1	C:GO:0016020	C:membrane
g26.t1	KAF5358313.1hypothetical protein D9756_001566	3	1.81e-100	85.39	1	C:GO:0016020	C:membrane
g27.t1	KXN89256.1hypothetical protein AN958_06010	3	5.78e-109	82.96	20	P:GO:0006457; P:GO:0006790; P:GO:0007005; P:GO:0015833; P:GO:0017038; P:GO:0030150; P:GO:0042026; P:GO:0044571; P:GO:0050790; P:GO:0065002; F:GO:0000774; F:GO:0042803; F:GO:0051082; F:GO:0051087; F:GO:0060589; C:GO:0001405; C:GO:0005759	P:protein folding; P:sulfur compound metabolic process; P:mitochondrion organization; P:peptide transport; P:protein import; P:protein import into mitochondrial matrix; P:protein refolding; P:[2Fe-2S] cluster assembly; P:regulation of catalytic activity; P:intracellular protein transmembrane transport; F:adenyl-nucleotide exchange factor activity; F:protein homodimerization activity; F:unfolded p…
g28.t1	KAF5358319.1hypothetical protein D9756_001568	3	0	94.22	10	P:GO:0035999; F:GO:0004329; F:GO:0004477; F:GO:0004488; F:GO:0005524	P:tetrahydrofolate interconversion; F:formate-tetrahydrofolate ligase activity; F:methenyltetrahydrofolate cyclohydrolase activity; F:methylenetetrahydrofolate dehydrogenase (NADP+) activity; F:ATP binding	EC:6.3.4.3; EC:3.5.4.9; EC:1.5.1.5	formate--tetrahydrofolate ligase; methenyltetrahydrofolate cyclohydrolase; methylenetetrahydrofolate dehydrogenase (NADP(+))
g30.t1	KAF5347000.1hypothetical protein D9756_011025	3	0	93.13	27	P:GO:0000070; P:GO:0007130; P:GO:0007131; P:GO:0030437; P:GO:0043388; P:GO:0044703; P:GO:0045144; P:GO:0051177; P:GO:0051276; P:GO:0051301; P:GO:0062022; P:GO:0071960; P:GO:1990414; F:GO:0003677; F:GO:0005524; F:GO:0008094; F:GO:0016887; F:GO:0019901; F:GO:0061775; C:GO:0000779; C:GO:0000794; C:GO:0005634; C:GO:0005694; C:GO:0030892	P:mitotic sister chromatid segregation; P:synaptonemal complex assembly; P:reciprocal meiotic recombination; P:ascospore formation; P:positive regulation of DNA binding; P:multi-organism reproductive process; P:meiotic sister chromatid segregation; P:meiotic sister chromatid cohesion; P:chromosome organization; P:cell division; P:mitotic cohesin ssDNA (lagging strand) loading; P:maintenance of mi…	EC:3.6.1.15	nucleoside-triphosphate phosphatase
g31.t1	KAF5347005.1hypothetical protein D9756_011008	3	5.8e-23	57.98	1	F:GO:0003824	F:catalytic activity
g32.t1	KAJ3568828.1hypothetical protein NP233_g5455	3	0	59.42	2	F:GO:0008757; C:GO:0016020	F:S-adenosylmethionine-dependent methyltransferase activity; C:membrane
g33.t1	KAF9450140.1Clavaminate synthase-like protein	3	4.46e-146	86.27	4	P:GO:0044283; P:GO:1901362; F:GO:0016491; F:GO:0046872	P:small molecule biosynthetic process; P:organic cyclic compound biosynthetic process; F:oxidoreductase activity; F:metal ion binding	EC:1	Oxidoreductases
g34.t1	KXN89522.1Protein pim1	3	1.43e-240	73.1
g35.t1	KAF9450137.1aldehyde dehydrogenase	3	1.43e-245	91.91	2	F:GO:0016620	F:oxidoreductase activity, acting on the aldehyde or oxo group of donors, NAD or NADP as acceptor	EC:1.2.1	Acting on the aldehyde or oxo group of donors
g36.t1	KAJ2916410.1hypothetical protein MD484_g3995, partial	3	0	81.28	6	P:GO:0006535; P:GO:0006555; P:GO:0009058; F:GO:0004414; F:GO:0009001; F:GO:0016747	P:cysteine biosynthetic process from serine; P:methionine metabolic process; P:biosynthetic process; F:homoserine O-acetyltransferase activity; F:serine O-acetyltransferase activity; F:acyltransferase activity, transferring groups other than amino-acyl groups	EC:2.3.1.30; EC:2.3.1.31	serine O-acetyltransferase; homoserine O-acetyltransferase
g37.t1	KAF5363503.1hypothetical protein D9756_000345	3	5.52e-62	95.24	8	P:GO:0006623; P:GO:0007034; P:GO:0015833; P:GO:0032511; P:GO:0043162; P:GO:0044248; C:GO:0000815; C:GO:0005770	P:protein targeting to vacuole; P:vacuolar transport; P:peptide transport; P:late endosome to vacuole transport via multivesicular body sorting pathway; P:ubiquitin-dependent protein catabolic process via the multivesicular body sorting pathway; P:cellular catabolic process; C:ESCRT III complex; C:late endosome
g38.t1	KAF5363544.1hypothetical protein D9756_000363	3	0	86.7	10	P:GO:0055085; F:GO:0005524; F:GO:0016887; F:GO:0140359; C:GO:0016020	P:transmembrane transport; F:ATP binding; F:ATP hydrolysis activity; F:ABC-type transporter activity; C:membrane	EC:7.2.2; EC:3.6.1.15	Catalysing the translocation of inorganic cations; nucleoside-triphosphate phosphatase
g39.t1	KAF5363542.1hypothetical protein D9756_000361	3	0	94.15	11	P:GO:0000920; P:GO:0006886; P:GO:0006893; P:GO:0015833; P:GO:0090522; C:GO:0000145; C:GO:0005737; C:GO:0005935; C:GO:0032153; C:GO:0043332; C:GO:0051285	P:septum digestion after cytokinesis; P:intracellular protein transport; P:Golgi to plasma membrane transport; P:peptide transport; P:vesicle tethering involved in exocytosis; C:exocyst; C:cytoplasm; C:cellular bud neck; C:cell division site; C:mating projection tip; C:cell cortex of cell tip
g40.t1	KAJ3575805.1hypothetical protein NP233_g841	3	0	86.99	10	P:GO:0006351; P:GO:0042790; F:GO:0003677; F:GO:0003899; F:GO:1990841; C:GO:0000428; C:GO:0005634; C:GO:0005736	P:DNA-templated transcription; P:nucleolar large rRNA transcription by RNA polymerase I; F:DNA binding; F:DNA-directed 5'-3' RNA polymerase activity; F:promoter-specific chromatin binding; C:DNA-directed RNA polymerase complex; C:nucleus; C:RNA polymerase I complex	EC:2.7.7.6	DNA-directed RNA polymerase
g41.t1	KAF5364044.1hypothetical protein D9756_000357	3	2.44e-60	71.72
g42.t1	KAF5364043.1hypothetical protein D9756_000356	3	1.16e-61	78.74
g43.t1	KAJ3575827.1hypothetical protein NP233_g837	3	6.53e-107	87.92	14	P:GO:0001731; P:GO:0002188; P:GO:0002192; P:GO:0006413; F:GO:0003729; F:GO:0003743; F:GO:0043022; F:GO:1901363; C:GO:0005737; C:GO:0005840; C:GO:0022626; C:GO:0070992; C:GO:1990904	P:formation of translation preinitiation complex; P:translation reinitiation; P:IRES-dependent translational initiation of linear mRNA; P:translational initiation; F:mRNA binding; F:translation initiation factor activity; F:ribosome binding; F:heterocyclic compound binding; C:cytoplasm; C:ribosome; C:cytosolic ribosome; C:translation initiation complex; C:ribonucleoprotein complex
g44.t1	KAF5364041.1hypothetical protein D9756_000354	3	4.85e-100	68.18
g45.t1	KAJ3575825.1hypothetical protein NP233_g834	3	6.34e-42	77.15	3	P:GO:0036503; P:GO:0043161; P:GO:0044248	P:ERAD pathway; P:proteasome-mediated ubiquitin-dependent protein catabolic process; P:cellular catabolic process
g46.t1	KAJ3575824.1hypothetical protein NP233_g833	3	9.7e-76	97.81	10	P:GO:0045292; F:GO:0000384; F:GO:0003723; F:GO:1901363; C:GO:0005634; C:GO:0005684; C:GO:0005686; C:GO:0071011; C:GO:0071013	P:mRNA cis splicing, via spliceosome; F:first spliceosomal transesterification activity; F:RNA binding; F:heterocyclic compound binding; C:nucleus; C:U2-type spliceosomal complex; C:U2 snRNP; C:precatalytic spliceosome; C:catalytic step 2 spliceosome
g47.t1	KAJ3575823.1hypothetical protein NP233_g832	3	4.93e-280	99.92	16	P:GO:0000462; P:GO:0008380; P:GO:0010468; P:GO:0010501; F:GO:0003676; F:GO:0003724; F:GO:0005524; F:GO:0016787; F:GO:0016887; C:GO:0005730; C:GO:0005737; C:GO:0071013; C:GO:0097078	P:maturation of SSU-rRNA from tricistronic rRNA transcript (SSU-rRNA, 5.8S rRNA, LSU-rRNA); P:RNA splicing; P:regulation of gene expression; P:RNA secondary structure unwinding; F:nucleic acid binding; F:RNA helicase activity; F:ATP binding; F:hydrolase activity; F:ATP hydrolysis activity; C:nucleolus; C:cytoplasm; C:catalytic step 2 spliceosome; C:FAL1-SGD1 complex	EC:3.6.4.13; EC:3.6.1.15	RNA helicase; nucleoside-triphosphate phosphatase
g48.t1	KAF5363509.1hypothetical protein D9756_000349	3	5.62e-303	89.7	10	P:GO:0000395; P:GO:0000398; F:GO:0003723; F:GO:0046872; F:GO:1901363; C:GO:0005681; C:GO:0005686; C:GO:0071004	P:mRNA 5'-splice site recognition; P:mRNA splicing, via spliceosome; F:RNA binding; F:metal ion binding; F:heterocyclic compound binding; C:spliceosomal complex; C:U2 snRNP; C:U2-type prespliceosome
g49.t1	KAF5363510.1hypothetical protein D9756_000348	3	0	86.79	4	P:GO:0046856; F:GO:0016791	P:phosphatidylinositol dephosphorylation; F:phosphatase activity	EC:3.1.3	Acting on ester bonds
g50.t1	KAF5363539.1hypothetical protein D9756_000364	3	5.58e-216	64.21	12	P:GO:0000470; P:GO:0010501; P:GO:1902626; F:GO:0003724; F:GO:0003824; F:GO:0016887; F:GO:0097159; C:GO:0005654; C:GO:0005730; C:GO:0005737; C:GO:0030686	P:maturation of LSU-rRNA; P:RNA secondary structure unwinding; P:assembly of large subunit precursor of preribosome; F:RNA helicase activity; F:catalytic activity; F:ATP hydrolysis activity; F:organic cyclic compound binding; C:nucleoplasm; C:nucleolus; C:cytoplasm; C:90S preribosome	EC:3.6.4.13; EC:3.6.1.15	RNA helicase; nucleoside-triphosphate phosphatase
g51.t1	KAJ3560244.1hypothetical protein NP233_g10967	3	0	83.11	10	P:GO:0009061; P:GO:0015031; P:GO:0022900; F:GO:0009055; F:GO:0016491; F:GO:0035091; F:GO:0043168; C:GO:0005739	P:anaerobic respiration; P:protein transport; P:electron transport chain; F:electron transfer activity; F:oxidoreductase activity; F:phosphatidylinositol binding; F:anion binding; C:mitochondrion	EC:1	Oxidoreductases
g52.t1	KAF5363541.1hypothetical protein D9756_000366	3	2.98e-258	55.88
g53.t1	KAF5363540.1hypothetical protein D9756_000367	3	2.99e-150	64.03	7	P:GO:0000209; P:GO:0031331; P:GO:0032436; F:GO:0008270; F:GO:0031624; F:GO:0061630; C:GO:0005829	P:protein polyubiquitination; P:positive regulation of cellular catabolic process; P:positive regulation of proteasomal ubiquitin-dependent protein catabolic process; F:zinc ion binding; F:ubiquitin conjugating enzyme binding; F:ubiquitin protein ligase activity; C:cytosol	EC:2.3.2	Acyltransferases
g54.t1	KAF5363645.1hypothetical protein D9756_000497	3	0	86.73	13	P:GO:0002181; P:GO:0006432; P:GO:0019752; P:GO:0043039; P:GO:0106074; F:GO:0000049; F:GO:0002161; F:GO:0004812; F:GO:0004826; F:GO:0005524; C:GO:0009328	P:cytoplasmic translation; P:phenylalanyl-tRNA aminoacylation; P:carboxylic acid metabolic process; P:tRNA aminoacylation; P:aminoacyl-tRNA metabolism involved in translational fidelity; F:tRNA binding; F:aminoacyl-tRNA editing activity; F:aminoacyl-tRNA ligase activity; F:phenylalanine-tRNA ligase activity; F:ATP binding; C:phenylalanine-tRNA ligase complex	EC:6.1.1.20; EC:3.1.1	phenylalanine--tRNA ligase; Acting on ester bonds
g55.t1	KAF5363643.1hypothetical protein D9756_000499	3	0	83.12	17	P:GO:0006606; P:GO:0006611; P:GO:0006886; P:GO:0015833; P:GO:0016973; P:GO:0017038; P:GO:0031503; P:GO:0071166; F:GO:0005215; F:GO:0031267; F:GO:0061608; C:GO:0005634; C:GO:0005643; C:GO:0005829; C:GO:0016020; C:GO:0034399	P:protein import into nucleus; P:protein export from nucleus; P:intracellular protein transport; P:peptide transport; P:poly(A)+ mRNA export from nucleus; P:protein import; P:protein-containing complex localization; P:ribonucleoprotein complex localization; F:transporter activity; F:small GTPase binding; F:nuclear import signal receptor activity; C:nucleus; C:nuclear pore; C:cytosol; C:membrane; …
g56.t1	KXN86406.1Folylpolyglutamate synthase	3	2.97e-206	89.44	16	P:GO:0006536; P:GO:0006730; P:GO:0043604; P:GO:0046394; P:GO:0046901; F:GO:0004326; F:GO:0005524; F:GO:0046872; C:GO:0005743; C:GO:0005783	P:glutamate metabolic process; P:one-carbon metabolic process; P:amide biosynthetic process; P:carboxylic acid biosynthetic process; P:tetrahydrofolylpolyglutamate biosynthetic process; F:tetrahydrofolylpolyglutamate synthase activity; F:ATP binding; F:metal ion binding; C:mitochondrial inner membrane; C:endoplasmic reticulum	EC:6.3.2.17	tetrahydrofolate synthase
g57.t1	KAJ3573353.1hypothetical protein NP233_g2488	3	0	75.22	10	P:GO:0007009; P:GO:0031566; P:GO:0032507; P:GO:0061951; P:GO:0065008; P:GO:0072659; P:GO:1902410; C:GO:0005739; C:GO:0005886; C:GO:0032991	P:plasma membrane organization; P:actomyosin contractile ring maturation; P:maintenance of protein location in cell; P:establishment of protein localization to plasma membrane; P:regulation of biological quality; P:protein localization to plasma membrane; P:mitotic cytokinetic process; C:mitochondrion; C:plasma membrane; C:protein-containing complex
g58.t1	KAF5363476.1hypothetical protein D9756_000505	3	1.06e-279	91.81	10	P:GO:0006805; P:GO:0009058; P:GO:0034276; P:GO:0097052; F:GO:0003824; F:GO:0016212; F:GO:0030170; F:GO:0047536; C:GO:0005739	P:xenobiotic metabolic process; P:biosynthetic process; P:kynurenic acid biosynthetic process; P:L-kynurenine metabolic process; F:catalytic activity; F:kynurenine-oxoglutarate transaminase activity; F:pyridoxal phosphate binding; F:2-aminoadipate transaminase activity; C:mitochondrion	EC:2.6.1.7; EC:2.6.1.39	kynurenine--oxoglutarate transaminase; 2-aminoadipate transaminase
g59.t1	KAF5364023.1hypothetical protein D9756_000510	3	3.38e-129	75.03	17	P:GO:0000055; P:GO:0000056; P:GO:0006409; P:GO:0006607; P:GO:0006611; P:GO:0010389; P:GO:0015833; P:GO:0016973; P:GO:0017038; P:GO:0071166; F:GO:0005543; F:GO:0017056; F:GO:0043168; C:GO:0016020; C:GO:0034399; C:GO:0044613; C:GO:0044615	P:ribosomal large subunit export from nucleus; P:ribosomal small subunit export from nucleus; P:tRNA export from nucleus; P:NLS-bearing protein import into nucleus; P:protein export from nucleus; P:regulation of G2/M transition of mitotic cell cycle; P:peptide transport; P:poly(A)+ mRNA export from nucleus; P:protein import; P:ribonucleoprotein complex localization; F:phospholipid binding; F:stru…
g60.t1	KAJ3573344.1hypothetical protein NP233_g2495	3	0	93.45	19	P:GO:0000348; P:GO:0006364; P:GO:0010468; P:GO:0010501; P:GO:0045292; P:GO:1903241; F:GO:0003676; F:GO:0003724; F:GO:0005524; F:GO:0016787; F:GO:0016887; F:GO:1990446; F:GO:1990447; C:GO:0005730; C:GO:0005737; C:GO:0071004	P:mRNA branch site recognition; P:rRNA processing; P:regulation of gene expression; P:RNA secondary structure unwinding; P:mRNA cis splicing, via spliceosome; P:U2-type prespliceosome assembly; F:nucleic acid binding; F:RNA helicase activity; F:ATP binding; F:hydrolase activity; F:ATP hydrolysis activity; F:U1 snRNP binding; F:U2 snRNP binding; C:nucleolus; C:cytoplasm; C:U2-type prespliceosome	EC:3.6.4.13; EC:3.6.1.15	RNA helicase; nucleoside-triphosphate phosphatase
g61.t1	KAF5363478.1hypothetical protein D9756_000507	3	3.49e-110	90.92
g62.t1	KAJ3573339.1hypothetical protein NP233_g2492	3	0	79.69	10	P:GO:0006826; F:GO:0000293; F:GO:0016740; F:GO:0046872; C:GO:0016020	P:iron ion transport; F:ferric-chelate reductase activity; F:transferase activity; F:metal ion binding; C:membrane	EC:1.16; EC:2	Oxidizing metal ions; Transferases
g63.t1	KAJ3573337.1hypothetical protein NP233_g2498	3	6.1e-77	84.81	2	F:GO:0016887	F:ATP hydrolysis activity	EC:3.6.1.15	nucleoside-triphosphate phosphatase
g64.t1	KXN86392.1Uracil phosphoribosyltransferase	3	7.4e-35	94.61	8	P:GO:0006206; P:GO:0006222; P:GO:0016310; P:GO:0043097; P:GO:0046132; F:GO:0004845; F:GO:0004849; F:GO:0016757	P:pyrimidine nucleobase metabolic process; P:UMP biosynthetic process; P:phosphorylation; P:pyrimidine nucleoside salvage; P:pyrimidine ribonucleoside biosynthetic process; F:uracil phosphoribosyltransferase activity; F:uridine kinase activity; F:glycosyltransferase activity	EC:2.7; EC:2.4.2.9	Transferring phosphorus-containing groups; uracil phosphoribosyltransferase
g65.t1	KAJ3575169.1hypothetical protein NP233_g1295	3	0	86.03	6	P:GO:0000103; F:GO:0003958; F:GO:0004783; F:GO:0016491; C:GO:0005622; C:GO:0009337	P:sulfate assimilation; F:NADPH-hemoprotein reductase activity; F:sulfite reductase (NADPH) activity; F:oxidoreductase activity; C:intracellular anatomical structure; C:sulfite reductase complex (NADPH)	EC:1.6.2.4; EC:1.8.1.2	NADPH--hemoprotein reductase; assimilatory sulfite reductase (NADPH)
g66.t1	KAF5364025.1hypothetical protein D9756_000516	3	0	87.02	6	P:GO:0030245; F:GO:0008810; C:GO:0016020	P:cellulose catabolic process; F:cellulase activity; C:membrane	EC:3.2.1.4	cellulase
g67.t1	PPQ99060.1hypothetical protein CVT24_003620	3	0	60.36	27	P:GO:0001932; P:GO:0009267; P:GO:0022603; P:GO:0030448; P:GO:0032108; P:GO:0034599; P:GO:0034605; P:GO:0043945; P:GO:0044419; P:GO:0045597; P:GO:0045762; P:GO:0046580; P:GO:0051784; P:GO:0071901; P:GO:0097271; P:GO:1900434; P:GO:1900444; F:GO:0004862; F:GO:0008603; F:GO:0030552; C:GO:0000228; C:GO:0000785; C:GO:0005737; C:GO:0005886; C:GO:0005952	P:regulation of protein phosphorylation; P:cellular response to starvation; P:regulation of anatomical structure morphogenesis; P:hyphal growth; P:negative regulation of response to nutrient levels; P:cellular response to oxidative stress; P:cellular response to heat; P:positive regulation of asexual sporulation resulting in formation of a cellular spore; P:biological process involved in interspe…
g68.t1	KAJ3575156.1hypothetical protein NP233_g1288	3	1.08E-313	90.09	4	P:GO:0008361; C:GO:0005737; C:GO:0016020	P:regulation of cell size; C:cytoplasm; C:membrane
g69.t1	KAF5388138.1hypothetical protein D9615_000264	3	2.09e-243	64.17	1	F:GO:0046872	F:metal ion binding
g70.t1	KAJ3561033.1hypothetical protein NP233_g10445	3	7.36e-29	63.77	1	F:GO:0003824	F:catalytic activity
g71.t1	XP_006454861.1rab-type small GTP-binding protein	3	6.91e-136	93.91	32	P:GO:0002790; P:GO:0006886; P:GO:0006893; P:GO:0006903; P:GO:0006904; P:GO:0006906; P:GO:0006914; P:GO:0007107; P:GO:0009306; P:GO:0017157; P:GO:0023052; P:GO:0031321; P:GO:0044703; P:GO:0071466; P:GO:0072659; F:GO:0003924; F:GO:0005525; F:GO:0032550; C:GO:0000131; C:GO:0005628; C:GO:0005741; C:GO:0005768; C:GO:0005783; C:GO:0005886; C:GO:0005934; C:GO:0005935; C:GO:0030133; C:GO:0031521; C:GO:00…	P:peptide secretion; P:intracellular protein transport; P:Golgi to plasma membrane transport; P:vesicle targeting; P:vesicle docking involved in exocytosis; P:vesicle fusion; P:autophagy; P:membrane addition at site of cytokinesis; P:protein secretion; P:regulation of exocytosis; P:signaling; P:ascospore-type prospore assembly; P:multi-organism reproductive process; P:cellular response to xenobio…	EC:3.6.1.15	nucleoside-triphosphate phosphatase
g72.t1	KAF5363824.1hypothetical protein D9756_000432	3	1.22e-99	67.49
g73.t1	KAF5363821.1hypothetical protein D9756_000431	3	0	85.17	26	P:GO:0006364; P:GO:0008298; P:GO:0017148; P:GO:0030682; P:GO:0034427; P:GO:0042783; P:GO:0060237; P:GO:1990074; F:GO:0000175; F:GO:0000900; F:GO:0003723; F:GO:0003730; F:GO:0046872; F:GO:0048027; F:GO:1901363; C:GO:0000178; C:GO:0000932; C:GO:0005634; C:GO:0005935; C:GO:0010494; C:GO:1990904	P:rRNA processing; P:intracellular mRNA localization; P:negative regulation of translation; P:symbiont-mediated perturbation of host defenses; P:obsolete nuclear-transcribed mRNA catabolic process, exonucleolytic, 3'-5'; P:evasion of host immune response; P:regulation of fungal-type cell wall organization; P:polyuridylation-dependent mRNA catabolic process; F:3'-5'-RNA exonuclease activity; F:mRN…	EC:3.1.13; EC:3.1.15	Acting on ester bonds; Acting on ester bonds
g74.t1	KXN89636.1Isocitrate dehydrogenase [NAD] subunit 2, mitochondrial	3	9.01e-221	86.34	14	P:GO:0006099; P:GO:0006101; P:GO:0006102; P:GO:0006537; P:GO:0006805; P:GO:0016999; F:GO:0000287; F:GO:0004449; F:GO:0051287; C:GO:0005962	P:tricarboxylic acid cycle; P:citrate metabolic process; P:isocitrate metabolic process; P:glutamate biosynthetic process; P:xenobiotic metabolic process; P:antibiotic metabolic process; F:magnesium ion binding; F:isocitrate dehydrogenase (NAD+) activity; F:NAD binding; C:obsolete mitochondrial isocitrate dehydrogenase complex (NAD+)	EC:1.1.1.41	isocitrate dehydrogenase (NAD(+))
g75.t1	KAF5363248.1hypothetical protein D9756_000428	3	0	79.17	2	P:GO:0006355; F:GO:0005488	P:regulation of DNA-templated transcription; F:binding
g76.t1	KAJ3570395.1hypothetical protein NP233_g4432	3	0	81.8	1	C:GO:0005634	C:nucleus
g77.t1	KAF5363245.1hypothetical protein D9756_000426	3	1.6e-192	96.26	12	P:GO:0000027; P:GO:0002181; P:GO:0006412; F:GO:0003735; F:GO:0008097; F:GO:1901363; C:GO:0005737; C:GO:0005840; C:GO:0022625; C:GO:1990904	P:ribosomal large subunit assembly; P:cytoplasmic translation; P:translation; F:structural constituent of ribosome; F:5S rRNA binding; F:heterocyclic compound binding; C:cytoplasm; C:ribosome; C:cytosolic large ribosomal subunit; C:ribonucleoprotein complex
g78.t1	KXN89631.1hypothetical protein AN958_05498	3	4.45e-123	87.52	4	P:GO:0045292; F:GO:0003723; F:GO:1901363	P:mRNA cis splicing, via spliceosome; F:RNA binding; F:heterocyclic compound binding
g79.t1	KAF7776664.1hypothetical protein Agabi119p4_5057	3	1.98e-20	71.85	1	F:GO:0003779	F:actin binding
g80.t1	KXN89629.1Protein disulfide-isomerase	3	1.62E-313	89.94	28	P:GO:0018401; P:GO:0034378; P:GO:0034379; P:GO:0034975; P:GO:0035722; P:GO:0038155; P:GO:0043062; P:GO:0043161; P:GO:0043687; P:GO:0044248; P:GO:0046598; P:GO:0071456; P:GO:1900407; P:GO:1902175; P:GO:1904382; F:GO:0003756; F:GO:0004656; F:GO:0005178; F:GO:0015035; F:GO:0046982; F:GO:0051082; C:GO:0005576; C:GO:0005788; C:GO:0005793; C:GO:0009897; C:GO:0016222	P:peptidyl-proline hydroxylation to 4-hydroxy-L-proline; P:chylomicron assembly; P:very-low-density lipoprotein particle assembly; P:protein folding in endoplasmic reticulum; P:interleukin-12-mediated signaling pathway; P:interleukin-23-mediated signaling pathway; P:extracellular structure organization; P:proteasome-mediated ubiquitin-dependent protein catabolic process; P:post-translational prot…	EC:5.3.4.1; EC:1.8; EC:1.14.11.2	protein disulfide-isomerase; Acting on a sulfur group of donors; procollagen-proline 4-dioxygenase
g81.t1	KXN89628.1hypothetical protein AN958_05495	3	7.17e-152	90.16	24	P:GO:0007020; P:GO:0031122; P:GO:0051128; P:GO:0051321; P:GO:0051415; P:GO:0071963; P:GO:0090307; F:GO:0005200; F:GO:0043015; C:GO:0000922; C:GO:0000923; C:GO:0000930; C:GO:0005737; C:GO:0005816; C:GO:0005824; C:GO:0005874; C:GO:0008275; C:GO:0061496; C:GO:0061497; C:GO:0071957	P:microtubule nucleation; P:cytoplasmic microtubule organization; P:regulation of cellular component organization; P:meiotic cell cycle; P:microtubule nucleation by interphase microtubule organizing center; P:establishment or maintenance of cell polarity regulating cell shape; P:mitotic spindle assembly; F:structural constituent of cytoskeleton; F:gamma-tubulin binding; C:spindle pole; C:equatori…
g82.t1	KAJ8086682.1hypothetical protein PM082_005505	3	3.07e-73	78.71	11	P:GO:0002181; P:GO:0030154; P:GO:0034599; P:GO:0050790; F:GO:0005509; F:GO:0008017; F:GO:1990624; C:GO:0005739; C:GO:0005829; C:GO:0010494; C:GO:1990904	P:cytoplasmic translation; P:cell differentiation; P:cellular response to oxidative stress; P:regulation of catalytic activity; F:calcium ion binding; F:microtubule binding; F:guanyl nucleotide exchange factor inhibitor activity; C:mitochondrion; C:cytosol; C:cytoplasmic stress granule; C:ribonucleoprotein complex
g83.t1	KAJ3565731.1hypothetical protein NP233_g7450	3	0	88.74	3	P:GO:0045292; C:GO:0005634; C:GO:0005681	P:mRNA cis splicing, via spliceosome; C:nucleus; C:spliceosomal complex
g84.t1	KAJ3565732.1hypothetical protein NP233_g7451	3	0	81.55	13	P:GO:0006281; P:GO:0006325; P:GO:0010628; P:GO:0016310; P:GO:0018393; P:GO:0045944; P:GO:0051276; F:GO:0016301; C:GO:0000124; C:GO:0000228; C:GO:0005654; C:GO:0035267; C:GO:0046695	P:DNA repair; P:chromatin organization; P:positive regulation of gene expression; P:phosphorylation; P:internal peptidyl-lysine acetylation; P:positive regulation of transcription by RNA polymerase II; P:chromosome organization; F:kinase activity; C:SAGA complex; C:nuclear chromosome; C:nucleoplasm; C:NuA4 histone acetyltransferase complex; C:SLIK (SAGA-like) complex	EC:2.7	Transferring phosphorus-containing groups
g85.t1	AHA86291.1aspartic protease 1	3	2.89e-308	92.66	15	P:GO:0006508; P:GO:0009267; P:GO:0016237; P:GO:0031505; P:GO:0032258; P:GO:0051603; F:GO:0004190; C:GO:0000324; C:GO:0005576; C:GO:0005739; C:GO:0005783; C:GO:0009277; C:GO:0009897	P:proteolysis; P:cellular response to starvation; P:microautophagy; P:fungal-type cell wall organization; P:cytoplasm to vacuole targeting by the Cvt pathway; P:proteolysis involved in protein catabolic process; F:aspartic-type endopeptidase activity; C:fungal-type vacuole; C:extracellular region; C:mitochondrion; C:endoplasmic reticulum; C:fungal-type cell wall; C:external side of plasma membrane	EC:3.4.23	Acting on peptide bonds (peptidases)
g86.t1	KAJ3576168.1hypothetical protein NP233_g578	3	1.47e-305	63.27	26	P:GO:0006368; P:GO:0006413; P:GO:0007346; P:GO:0018105; P:GO:0023052; P:GO:0031124; P:GO:0032786; P:GO:0045903; P:GO:0045943; P:GO:0045944; P:GO:0110020; P:GO:1900237; P:GO:1903436; P:GO:2000243; F:GO:0000976; F:GO:0004674; F:GO:0004693; F:GO:0005524; F:GO:0008134; F:GO:0008353; F:GO:0030332; C:GO:0000228; C:GO:0000785; C:GO:0005730; C:GO:0070692	P:transcription elongation by RNA polymerase II; P:translational initiation; P:regulation of mitotic cell cycle; P:peptidyl-serine phosphorylation; P:signaling; P:mRNA 3'-end processing; P:positive regulation of DNA-templated transcription, elongation; P:positive regulation of translational fidelity; P:positive regulation of transcription by RNA polymerase I; P:positive regulation of transcriptio…	EC:2.7.11.23; EC:2.7.11.1; EC:2.7.11.22	[RNA-polymerase]-subunit kinase; non-specific serine/threonine protein kinase; cyclin-dependent kinase
g87.t1	KAJ3576167.1hypothetical protein NP233_g579	3	3.94e-277	91.83	5	P:GO:0000338; P:GO:0006508; P:GO:0044237; C:GO:0005829; C:GO:0008180	P:protein deneddylation; P:proteolysis; P:cellular metabolic process; C:cytosol; C:COP9 signalosome
g88.t1	KAJ3576183.1hypothetical protein NP233_g605	3	0	83.81	12	P:GO:0002181; P:GO:0006425; P:GO:0019752; F:GO:0003729; F:GO:0004819; F:GO:0005524; C:GO:0005737; C:GO:0005739; C:GO:0005829	P:cytoplasmic translation; P:glutaminyl-tRNA aminoacylation; P:carboxylic acid metabolic process; F:mRNA binding; F:glutamine-tRNA ligase activity; F:ATP binding; C:cytoplasm; C:mitochondrion; C:cytosol	EC:6.1.1.18	glutamine--tRNA ligase
g89.t1	KAE9410144.1tubulin alpha	3	4.17e-281	91.82	13	P:GO:0000280; P:GO:0007010; P:GO:0007017; P:GO:0046785; F:GO:0005200; F:GO:0005525; F:GO:0016787; C:GO:0005874; C:GO:0005881; C:GO:0045298	P:nuclear division; P:cytoskeleton organization; P:microtubule-based process; P:microtubule polymerization; F:structural constituent of cytoskeleton; F:GTP binding; F:hydrolase activity; C:microtubule; C:cytoplasmic microtubule; C:tubulin complex	EC:3	Hydrolases
g90.t1	KAG6327492.1hypothetical protein ID866_11597	3	1.32e-54	75.16
g91.t1	KAF5361992.1hypothetical protein D9756_002766	3	1.89e-124	46.53
g93.t1	KXN89910.1Galactinol synthase 1	3	3.17e-94	75.55	2	F:GO:0016740; F:GO:0016757	F:transferase activity; F:glycosyltransferase activity
g94.t1	KAF9452656.1O-sialoglycoprotein endopeptidase	3	1.36e-192	94.4	19	P:GO:0000722; P:GO:0002949; P:GO:0010628; P:GO:0045944; P:GO:0060249; P:GO:0065008; F:GO:0031490; F:GO:0046872; F:GO:0061711; F:GO:1901363; C:GO:0000408; C:GO:0005634; C:GO:0005737	P:telomere maintenance via recombination; P:tRNA threonylcarbamoyladenosine modification; P:positive regulation of gene expression; P:positive regulation of transcription by RNA polymerase II; P:anatomical structure homeostasis; P:regulation of biological quality; F:chromatin DNA binding; F:metal ion binding; F:N(6)-L-threonylcarbamoyladenine synthase activity; F:heterocyclic compound binding; C:…	EC:2.3.1.234	N(6)-L-threonylcarbamoyladenine synthase
g95.t1	KAF5356071.1hypothetical protein D9756_003870	3	1.64e-117	52.72	5	P:GO:0006399; P:GO:0044249; P:GO:1901576; F:GO:0016740; C:GO:0005622	P:tRNA metabolic process; P:cellular biosynthetic process; P:organic substance biosynthetic process; F:transferase activity; C:intracellular anatomical structure	EC:2	Transferases
g96.t1	KAJ3561279.1hypothetical protein NP233_g10287	3	1.59e-247	86.89	8	P:GO:0006086; F:GO:0004742; C:GO:0005739; C:GO:0045254	P:acetyl-CoA biosynthetic process from pyruvate; F:dihydrolipoyllysine-residue acetyltransferase activity; C:mitochondrion; C:pyruvate dehydrogenase complex	EC:2.3.1.12	dihydrolipoyllysine-residue acetyltransferase
g97.t1	KAF5355686.1hypothetical protein D9756_003868	3	6.8e-163	82.67	9	P:GO:0000132; P:GO:0007020; P:GO:0007059; P:GO:0007097; P:GO:0047496; P:GO:0051303; F:GO:0008017; C:GO:0000776; C:GO:0005871	P:establishment of mitotic spindle orientation; P:microtubule nucleation; P:chromosome segregation; P:nuclear migration; P:vesicle transport along microtubule; P:establishment of chromosome localization; F:microtubule binding; C:kinetochore; C:kinesin complex
g98.t1	KAF5355687.1hypothetical protein D9756_003867	3	2.23e-130	78.22	4	P:GO:0045292; C:GO:0005634; C:GO:0071014; C:GO:0072686	P:mRNA cis splicing, via spliceosome; C:nucleus; C:post-mRNA release spliceosomal complex; C:mitotic spindle
g99.t1	KAF5355922.1hypothetical protein D9756_003866	3	3.28e-109	87.67	1	C:GO:0005634	C:nucleus
g100.t1	KAJ3570253.1hypothetical protein NP233_g4523	3	4.59e-91	68.96	4	P:GO:0000724; P:GO:0006281; C:GO:0005657; C:GO:0033063	P:double-strand break repair via homologous recombination; P:DNA repair; C:replication fork; C:Rad51B-Rad51C-Rad51D-XRCC2 complex
g101.t1	KAF5355690.1hypothetical protein D9756_003861	3	0	74.08
g102.t1	KAF5356041.1hypothetical protein D9756_003857	3	8.09e-146	83.93	25	P:GO:0002183; P:GO:0006355; P:GO:0006413; P:GO:0009847; P:GO:0071466; F:GO:0003700; F:GO:0003723; F:GO:0003743; F:GO:0031369; F:GO:1901363; C:GO:0005634; C:GO:0005852; C:GO:0009277; C:GO:0010494; C:GO:0016282; C:GO:0033290; C:GO:0043614; C:GO:0071540; C:GO:0071541	P:cytoplasmic translational initiation; P:regulation of DNA-templated transcription; P:translational initiation; P:spore germination; P:cellular response to xenobiotic stimulus; F:DNA-binding transcription factor activity; F:RNA binding; F:translation initiation factor activity; F:translation initiation factor binding; F:heterocyclic compound binding; C:nucleus; C:eukaryotic translation initiatio…
g103.t1	KAJ3570248.1hypothetical protein NP233_g4527	3	0	77.72	15	P:GO:0002183; P:GO:0009847; P:GO:0071466; F:GO:0003676; F:GO:0003723; F:GO:0003743; F:GO:1901363; C:GO:0005622; C:GO:0009277; C:GO:0010494; C:GO:0016282; C:GO:0033290; C:GO:0043614; C:GO:0071540; C:GO:0071541	P:cytoplasmic translational initiation; P:spore germination; P:cellular response to xenobiotic stimulus; F:nucleic acid binding; F:RNA binding; F:translation initiation factor activity; F:heterocyclic compound binding; C:intracellular anatomical structure; C:fungal-type cell wall; C:cytoplasmic stress granule; C:eukaryotic 43S preinitiation complex; C:eukaryotic 48S preinitiation complex; C:multi…
g104.t1	KAF5355800.1hypothetical protein D9756_003854	3	0	83.25	11	P:GO:0000463; P:GO:0000466; P:GO:0001510; P:GO:0006364; P:GO:0031167; F:GO:0008650; F:GO:0008757; F:GO:0016435; C:GO:0005634; C:GO:0005730; C:GO:0030687	P:maturation of LSU-rRNA from tricistronic rRNA transcript (SSU-rRNA, 5.8S rRNA, LSU-rRNA); P:maturation of 5.8S rRNA from tricistronic rRNA transcript (SSU-rRNA, 5.8S rRNA, LSU-rRNA); P:RNA methylation; P:rRNA processing; P:rRNA methylation; F:rRNA (uridine-2'-O-)-methyltransferase activity; F:S-adenosylmethionine-dependent methyltransferase activity; F:rRNA (guanine) methyltransferase activity;…	EC:2.1.1	Transferring one-carbon groups
g105.t1	KAF5337039.1hypothetical protein D9611_003291	3	2.42e-275	81.02	14	P:GO:0006099; P:GO:0006101; P:GO:0006106; P:GO:0006108; P:GO:0006805; P:GO:0016999; F:GO:0004333; C:GO:0005759; C:GO:0005829; C:GO:0045239	P:tricarboxylic acid cycle; P:citrate metabolic process; P:fumarate metabolic process; P:malate metabolic process; P:xenobiotic metabolic process; P:antibiotic metabolic process; F:fumarate hydratase activity; C:mitochondrial matrix; C:cytosol; C:tricarboxylic acid cycle heteromeric enzyme complex	EC:4.2.1.2	fumarate hydratase
g106.t1	KAF5356342.1hypothetical protein D9756_003876	3	0	86.18	22	P:GO:0000722; P:GO:0006281; P:GO:0006974; P:GO:0010628; P:GO:0022607; P:GO:0031509; P:GO:0032508; P:GO:0034728; P:GO:0045892; P:GO:0045944; P:GO:0051983; P:GO:0060249; P:GO:0065008; P:GO:0080040; F:GO:0000166; F:GO:0003824; F:GO:0016887; F:GO:0043138; C:GO:0005634; C:GO:0031011; C:GO:0033202	P:telomere maintenance via recombination; P:DNA repair; P:DNA damage response; P:positive regulation of gene expression; P:cellular component assembly; P:subtelomeric heterochromatin formation; P:DNA duplex unwinding; P:nucleosome organization; P:negative regulation of DNA-templated transcription; P:positive regulation of transcription by RNA polymerase II; P:regulation of chromosome segregation;…	EC:5.6.2.4; EC:3.6.1.15	DNA 3'-5' helicase; nucleoside-triphosphate phosphatase
g107.t1	KAF5356343.1hypothetical protein D9756_003877	3	0	75.72	11	P:GO:0002183; P:GO:0006396; F:GO:0000166; F:GO:0003723; F:GO:0003724; F:GO:0003824; F:GO:0016887; F:GO:0043024; F:GO:0140657; C:GO:0005739	P:cytoplasmic translational initiation; P:RNA processing; F:nucleotide binding; F:RNA binding; F:RNA helicase activity; F:catalytic activity; F:ATP hydrolysis activity; F:ribosomal small subunit binding; F:ATP-dependent activity; C:mitochondrion	EC:3.6.4.13; EC:3.6.1.15	RNA helicase; nucleoside-triphosphate phosphatase
g108.t1	KAG2023342.160S ribosomal protein L22	3	3.45e-48	76.65	5	P:GO:0002181; F:GO:0003723; F:GO:0003735; F:GO:1901363; C:GO:0022625	P:cytoplasmic translation; F:RNA binding; F:structural constituent of ribosome; F:heterocyclic compound binding; C:cytosolic large ribosomal subunit
g109.t1	KAJ3571583.1hypothetical protein NP233_g3655	3	2.72e-285	94.06	23	P:GO:0000495; P:GO:0001522; P:GO:0006396; P:GO:0006897; P:GO:0030010; P:GO:0031118; P:GO:0031120; P:GO:0042254; P:GO:0043628; P:GO:0048315; P:GO:0051211; P:GO:1990481; F:GO:0003723; F:GO:0003729; F:GO:0004730; F:GO:0009982; F:GO:0019843; F:GO:0034513; F:GO:1901363; C:GO:0030686; C:GO:0031429; C:GO:1990904	P:box H/ACA sno(s)RNA 3'-end processing; P:pseudouridine synthesis; P:RNA processing; P:endocytosis; P:establishment of cell polarity; P:rRNA pseudouridine synthesis; P:snRNA pseudouridine synthesis; P:ribosome biogenesis; P:regulatory ncRNA 3'-end processing; P:conidium formation; P:anisotropic cell growth; P:mRNA pseudouridine synthesis; F:RNA binding; F:mRNA binding; F:pseudouridylate synthase…	EC:4.2.1.70; EC:5.4	pseudouridylate synthase; Intramolecular transferases
g110.t1	KAF9447372.1hypothetical protein P691DRAFT_731619	3	5.22e-199	84.13	19	P:GO:0006446; P:GO:0006449; P:GO:0006611; P:GO:0015833; P:GO:0016973; P:GO:0031503; P:GO:0043085; P:GO:0051028; P:GO:0051641; P:GO:0071166; F:GO:0000822; F:GO:0005543; F:GO:0008047; F:GO:0031369; C:GO:0005634; C:GO:0005739; C:GO:0016020; C:GO:0034399; C:GO:0044614	P:regulation of translational initiation; P:regulation of translational termination; P:protein export from nucleus; P:peptide transport; P:poly(A)+ mRNA export from nucleus; P:protein-containing complex localization; P:positive regulation of catalytic activity; P:mRNA transport; P:cellular localization; P:ribonucleoprotein complex localization; F:inositol hexakisphosphate binding; F:phospholipid …
g112.t1	KAF5357854.1hypothetical protein D9756_001653	3	1.09e-13	53.66	4	P:GO:0009058; P:GO:0044271; F:GO:0005085; F:GO:0031369	P:biosynthetic process; P:cellular nitrogen compound biosynthetic process; F:guanyl-nucleotide exchange factor activity; F:translation initiation factor binding
g113.t1	KXN85472.1putative translation initiation factor eIF-2B subunit epsilon	3	2.53e-215	82.68	12	P:GO:0002183; P:GO:0006446; P:GO:0009058; P:GO:0065009; F:GO:0003723; F:GO:0003743; F:GO:0005085; F:GO:0051020; F:GO:1901363; C:GO:0005829; C:GO:0005851; C:GO:0032045	P:cytoplasmic translational initiation; P:regulation of translational initiation; P:biosynthetic process; P:regulation of molecular function; F:RNA binding; F:translation initiation factor activity; F:guanyl-nucleotide exchange factor activity; F:GTPase binding; F:heterocyclic compound binding; C:cytosol; C:eukaryotic translation initiation factor 2B complex; C:guanyl-nucleotide exchange factor c…
g114.t1	KXN85469.1Kynureninase	3	6.14e-281	90.37	21	P:GO:0006569; P:GO:0006767; P:GO:0019441; P:GO:0019805; P:GO:0034354; P:GO:0042402; P:GO:0043420; P:GO:0097053; F:GO:0030170; F:GO:0030429; F:GO:0061981; C:GO:0005634; C:GO:0005737	P:tryptophan catabolic process; P:water-soluble vitamin metabolic process; P:tryptophan catabolic process to kynurenine; P:quinolinate biosynthetic process; P:'de novo' NAD biosynthetic process from tryptophan; P:cellular biogenic amine catabolic process; P:anthranilate metabolic process; P:L-kynurenine catabolic process; F:pyridoxal phosphate binding; F:kynureninase activity; F:3-hydroxykynureni…	EC:3.7.1.3	kynureninase
g115.t1	KAJ3561903.1hypothetical protein NP233_g9910	3	1.78e-47	73.69	1	F:GO:0003677	F:DNA binding
g116.t1	KXN85466.1hypothetical protein AN958_11270	3	2.88e-202	71.85	9	P:GO:0015833; P:GO:0030968; P:GO:0030970; P:GO:0043161; P:GO:0044248; P:GO:0097466; F:GO:0070492; C:GO:0016020; C:GO:0034099	P:peptide transport; P:endoplasmic reticulum unfolded protein response; P:retrograde protein transport, ER to cytosol; P:proteasome-mediated ubiquitin-dependent protein catabolic process; P:cellular catabolic process; P:ubiquitin-dependent glycoprotein ERAD pathway; F:oligosaccharide binding; C:membrane; C:luminal surveillance complex
g117.t1	KAF5358277.1hypothetical protein D9756_001647	3	0	74.21	9	P:GO:0000122; P:GO:0006468; P:GO:0006808; P:GO:0010629; P:GO:0035556; F:GO:0004674; F:GO:0005524; C:GO:0005634; C:GO:0005737	P:negative regulation of transcription by RNA polymerase II; P:protein phosphorylation; P:regulation of nitrogen utilization; P:negative regulation of gene expression; P:intracellular signal transduction; F:protein serine/threonine kinase activity; F:ATP binding; C:nucleus; C:cytoplasm	EC:2.7.11.1	non-specific serine/threonine protein kinase
g118.t1	KXN85464.1Pre-mRNA-splicing ATP-dependent RNA helicase PRP28	3	0	89.51	16	P:GO:0000354; P:GO:0000395; P:GO:0010501; F:GO:0000384; F:GO:0003676; F:GO:0003723; F:GO:0003724; F:GO:0005524; F:GO:0016787; F:GO:0016887; C:GO:0005682; C:GO:0005730; C:GO:0005737; C:GO:0071013	P:cis assembly of pre-catalytic spliceosome; P:mRNA 5'-splice site recognition; P:RNA secondary structure unwinding; F:first spliceosomal transesterification activity; F:nucleic acid binding; F:RNA binding; F:RNA helicase activity; F:ATP binding; F:hydrolase activity; F:ATP hydrolysis activity; C:U5 snRNP; C:nucleolus; C:cytoplasm; C:catalytic step 2 spliceosome	EC:3.6.4.13; EC:3.6.1.15	RNA helicase; nucleoside-triphosphate phosphatase
g119.t1	KAF5358273.1hypothetical protein D9756_001643	3	0	79.42	1	F:GO:0005085	F:guanyl-nucleotide exchange factor activity
g120.t1	KAF5358274.1hypothetical protein D9756_001642	3	0	84.8	11	P:GO:0006529; P:GO:0006541; P:GO:0043604; P:GO:0072330; F:GO:0004066; F:GO:0005524; F:GO:0042803	P:asparagine biosynthetic process; P:glutamine metabolic process; P:amide biosynthetic process; P:monocarboxylic acid biosynthetic process; F:asparagine synthase (glutamine-hydrolyzing) activity; F:ATP binding; F:protein homodimerization activity	EC:6.3.5.4	asparagine synthase (glutamine-hydrolyzing)
g121.t1	KAF5358271.1hypothetical protein D9756_001641	3	7.2e-99	70.5	17	P:GO:0006886; P:GO:0006887; P:GO:0006893; P:GO:0006906; P:GO:0015833; P:GO:0032120; P:GO:0044703; P:GO:0048278; F:GO:0000149; F:GO:0005484; C:GO:0005768; C:GO:0031201; C:GO:0032153; C:GO:0044853; C:GO:0051286; C:GO:0070056; C:GO:0070057	P:intracellular protein transport; P:exocytosis; P:Golgi to plasma membrane transport; P:vesicle fusion; P:peptide transport; P:ascospore-type prospore membrane formation; P:multi-organism reproductive process; P:vesicle docking; F:SNARE binding; F:SNAP receptor activity; C:endosome; C:SNARE complex; C:cell division site; C:plasma membrane raft; C:cell tip; C:prospore membrane leading edge; C:pro…
g122.t1	KAF5357974.1hypothetical protein D9756_001639	3	0	78.15	2	F:GO:0005524; F:GO:0016887	F:ATP binding; F:ATP hydrolysis activity
g124.t1	KAF5357773.1hypothetical protein D9756_001634	3	0	87.41	11	P:GO:0006508; P:GO:0010995; P:GO:0016579; P:GO:0044237; P:GO:0065008; F:GO:0004843; C:GO:0005777; C:GO:0005783; C:GO:0005829	P:proteolysis; P:free ubiquitin chain depolymerization; P:protein deubiquitination; P:cellular metabolic process; P:regulation of biological quality; F:cysteine-type deubiquitinase activity; C:peroxisome; C:endoplasmic reticulum; C:cytosol	EC:3.4.19.12	ubiquitinyl hydrolase 1
g125.t1	KAF5357779.1hypothetical protein D9756_001633	3	4.21e-111	82.6	7	P:GO:0015833; P:GO:0030447; P:GO:0031204; C:GO:0031207; C:GO:0071944	P:peptide transport; P:filamentous growth; P:post-translational protein targeting to membrane, translocation; C:Sec62/Sec63 complex; C:cell periphery
g126.t1	KAF5357778.1hypothetical protein D9756_001632	3	9.72e-246	92.14	6	P:GO:0006099; P:GO:0006101; F:GO:0004108	P:tricarboxylic acid cycle; P:citrate metabolic process; F:citrate (Si)-synthase activity	EC:2.3.3.16	citrate synthase (unknown stereospecificity)
g127.t1	KXN85450.1hypothetical protein AN958_11254	3	2.75e-165	78.95
g128.t1	KAJ3561033.1hypothetical protein NP233_g10445	3	1.98e-25	61.14	1	F:GO:0003824	F:catalytic activity
g130.t1	KAF7770804.1hypothetical protein Agabi119p4_6778	3	4.26e-92	80.81	4	P:GO:0015074; F:GO:0003676; F:GO:0003723; C:GO:0005634	P:DNA integration; F:nucleic acid binding; F:RNA binding; C:nucleus
g131.t1	KAJ3576108.1hypothetical protein NP233_g672	3	1.49e-60	63.62	3	F:GO:0003676; F:GO:0008270; C:GO:0005634	F:nucleic acid binding; F:zinc ion binding; C:nucleus
g132.t1	KAF5347027.1hypothetical protein D9756_011014	3	1e-20	57.22	1	F:GO:0003824	F:catalytic activity
g133.t1	XP_006454861.1rab-type small GTP-binding protein	3	3.57e-136	93.95	32	P:GO:0002790; P:GO:0006886; P:GO:0006893; P:GO:0006903; P:GO:0006904; P:GO:0006906; P:GO:0006914; P:GO:0007107; P:GO:0009306; P:GO:0017157; P:GO:0023052; P:GO:0031321; P:GO:0044703; P:GO:0071466; P:GO:0072659; F:GO:0003924; F:GO:0005525; F:GO:0032550; C:GO:0000131; C:GO:0005628; C:GO:0005741; C:GO:0005768; C:GO:0005783; C:GO:0005886; C:GO:0005934; C:GO:0005935; C:GO:0030133; C:GO:0031521; C:GO:00…	P:peptide secretion; P:intracellular protein transport; P:Golgi to plasma membrane transport; P:vesicle targeting; P:vesicle docking involved in exocytosis; P:vesicle fusion; P:autophagy; P:membrane addition at site of cytokinesis; P:protein secretion; P:regulation of exocytosis; P:signaling; P:ascospore-type prospore assembly; P:multi-organism reproductive process; P:cellular response to xenobio…	EC:3.6.1.15	nucleoside-triphosphate phosphatase
g134.t1	KAF5363950.1hypothetical protein D9756_000807	3	0	74.7	19	P:GO:0000321; P:GO:0007088; P:GO:0007096; P:GO:0016239; P:GO:0031030; P:GO:0031139; P:GO:0031573; P:GO:0031991; P:GO:0046580; P:GO:0061509; P:GO:0110020; P:GO:1903437; P:GO:2000243; C:GO:0000138; C:GO:0005635; C:GO:0005783; C:GO:0005829; C:GO:0071957; C:GO:0090443	P:re-entry into mitotic cell cycle after pheromone arrest; P:regulation of mitotic nuclear division; P:regulation of exit from mitosis; P:positive regulation of macroautophagy; P:negative regulation of septation initiation signaling; P:positive regulation of conjugation with cellular fusion; P:mitotic intra-S DNA damage checkpoint signaling; P:regulation of actomyosin contractile ring contraction…
g135.t1	KAF5363941.1hypothetical protein D9756_000808	3	0	79.21	1	F:GO:0019901	F:protein kinase binding
g136.t1	TFY80751.1hypothetical protein EWM64_g3261	3	0	79.99	11	P:GO:0006511; P:GO:0006974; P:GO:0016567; P:GO:0044248; F:GO:0000287; F:GO:0004839; F:GO:0005524; F:GO:0008641; C:GO:0005634; C:GO:0005737	P:ubiquitin-dependent protein catabolic process; P:DNA damage response; P:protein ubiquitination; P:cellular catabolic process; F:magnesium ion binding; F:ubiquitin activating enzyme activity; F:ATP binding; F:ubiquitin-like modifier activating enzyme activity; C:nucleus; C:cytoplasm	EC:6.2.1.45	E1 ubiquitin-activating enzyme
g137.t1	KAJ3572641.1hypothetical protein NP233_g2955	3	1.3e-147	91.72	21	P:GO:0006457; P:GO:0006508; P:GO:0007005; P:GO:0015833; P:GO:0017038; P:GO:0030150; P:GO:0030163; P:GO:0031325; P:GO:0042026; P:GO:0065002; P:GO:1904287; F:GO:0004176; F:GO:0005524; F:GO:0016887; F:GO:0051082; F:GO:0140662; C:GO:0005759	P:protein folding; P:proteolysis; P:mitochondrion organization; P:peptide transport; P:protein import; P:protein import into mitochondrial matrix; P:protein catabolic process; P:positive regulation of cellular metabolic process; P:protein refolding; P:intracellular protein transmembrane transport; P:positive regulation of protein-pyridoxal-5-phosphate linkage; F:ATP-dependent peptidase activity; …	EC:3.4; EC:3.6.1.15	Acting on peptide bonds (peptidases); nucleoside-triphosphate phosphatase
g138.t1	KAF9468860.1RanBP1 domain-containing protein	3	2.34e-42	67.34	15	P:GO:0000082; P:GO:0006405; P:GO:0006511; P:GO:0006606; P:GO:0007051; P:GO:0007265; P:GO:0015833; P:GO:0017038; P:GO:0031291; P:GO:0044248; F:GO:0005525; F:GO:0031267; F:GO:0032550; C:GO:0005634; C:GO:0005829	P:G1/S transition of mitotic cell cycle; P:RNA export from nucleus; P:ubiquitin-dependent protein catabolic process; P:protein import into nucleus; P:spindle organization; P:Ras protein signal transduction; P:peptide transport; P:protein import; P:Ran protein signal transduction; P:cellular catabolic process; F:GTP binding; F:small GTPase binding; F:purine ribonucleoside binding; C:nucleus; C:cyt…
g139.t1	KDQ64668.1hypothetical protein JAAARDRAFT_201974	3	1.54e-24	64.65	10	P:GO:0006621; P:GO:0006886; P:GO:0006888; P:GO:0015833; P:GO:0016050; P:GO:0065008; C:GO:0005783; C:GO:0005798; C:GO:0016020; C:GO:0030134	P:protein retention in ER lumen; P:intracellular protein transport; P:endoplasmic reticulum to Golgi vesicle-mediated transport; P:peptide transport; P:vesicle organization; P:regulation of biological quality; C:endoplasmic reticulum; C:Golgi-associated vesicle; C:membrane; C:COPII-coated ER to Golgi transport vesicle
g140.t1	KAF5363403.1hypothetical protein D9756_000814	3	0	82.92	22	P:GO:0000132; P:GO:0007018; P:GO:0007088; P:GO:0030473; P:GO:0031115; P:GO:0032888; P:GO:0051228; P:GO:0060236; P:GO:0070462; P:GO:0090307; F:GO:0003777; F:GO:0005524; F:GO:0008017; F:GO:0008574; F:GO:0016887; F:GO:0070463; C:GO:0005856; C:GO:0005871; C:GO:0005880; C:GO:0005881	P:establishment of mitotic spindle orientation; P:microtubule-based movement; P:regulation of mitotic nuclear division; P:nuclear migration along microtubule; P:negative regulation of microtubule polymerization; P:regulation of mitotic spindle elongation; P:mitotic spindle disassembly; P:regulation of mitotic spindle organization; P:plus-end specific microtubule depolymerization; P:mitotic spindl…	EC:5.6.1.3; EC:3.6.1.15	plus-end-directed kinesin ATPase; nucleoside-triphosphate phosphatase
g141.t1	XP_001875297.1predicted protein	3	3.6e-45	93.84	10	P:GO:0006207; P:GO:0019856; P:GO:0044205; F:GO:0004151; F:GO:0046872; C:GO:0005634; C:GO:0005737	P:'de novo' pyrimidine nucleobase biosynthetic process; P:pyrimidine nucleobase biosynthetic process; P:'de novo' UMP biosynthetic process; F:dihydroorotase activity; F:metal ion binding; C:nucleus; C:cytoplasm	EC:3.5.2.3	dihydroorotase
g142.t1	KAF5363400.1hypothetical protein D9756_000817	3	1.17e-187	66.37
g143.t1	KAF5363396.1hypothetical protein D9756_000818	3	0	67.39	4	F:GO:0008017; C:GO:0005737; C:GO:0005856; C:GO:0016020	F:microtubule binding; C:cytoplasm; C:cytoskeleton; C:membrane
g144.t1	KAF5363396.1hypothetical protein D9756_000818	3	1e-202	71.09	1	C:GO:0016020	C:membrane
g145.t1	KAF7762597.1hypothetical protein Agabi119p4_9190	3	3.05e-61	78.38
g146.t1	KAJ3576108.1hypothetical protein NP233_g672	3	2.12e-64	65.36	3	F:GO:0003676; F:GO:0008270; C:GO:0005634	F:nucleic acid binding; F:zinc ion binding; C:nucleus
g147.t1	KAF5363337.1hypothetical protein D9756_000466	3	0	77.93	1	C:GO:0005739	C:mitochondrion
g148.t1	KAJ3566417.1hypothetical protein NP233_g7018	3	2.97e-128	77.14
g149.t1	KAF5363339.1hypothetical protein D9756_000464	3	1.6e-195	79.01	6	P:GO:0000467; P:GO:0034476; P:GO:0043628; F:GO:0000175; C:GO:0005634; C:GO:0005737	P:exonucleolytic trimming to generate mature 3'-end of 5.8S rRNA from tricistronic rRNA transcript (SSU-rRNA, 5.8S rRNA, LSU-rRNA); P:U5 snRNA 3'-end processing; P:regulatory ncRNA 3'-end processing; F:3'-5'-RNA exonuclease activity; C:nucleus; C:cytoplasm	EC:3.1.13; EC:3.1.15	Acting on ester bonds; Acting on ester bonds
g150.t1	KAF5363341.1hypothetical protein D9756_000463	3	4.34e-202	88.04	7	P:GO:0007009; P:GO:0046513; F:GO:0050291; C:GO:0005789; C:GO:0016020	P:plasma membrane organization; P:ceramide biosynthetic process; F:sphingosine N-acyltransferase activity; C:endoplasmic reticulum membrane; C:membrane	EC:2.3.1.24	sphingosine N-acyltransferase
g151.t1	KAF5363342.1hypothetical protein D9756_000460	3	5.33e-249	71.81	10	P:GO:0000027; P:GO:0002181; P:GO:0006412; F:GO:0003723; F:GO:0003735; F:GO:1901363; C:GO:0005840; C:GO:0022625; C:GO:1990904	P:ribosomal large subunit assembly; P:cytoplasmic translation; P:translation; F:RNA binding; F:structural constituent of ribosome; F:heterocyclic compound binding; C:ribosome; C:cytosolic large ribosomal subunit; C:ribonucleoprotein complex
g152.t1	KXN89669.1hypothetical protein AN958_05536	3	9.57e-142	89.29	3	P:GO:0006206; P:GO:0016311; F:GO:0008253	P:pyrimidine nucleobase metabolic process; P:dephosphorylation; F:5'-nucleotidase activity	EC:3.1.3.5	5'-nucleotidase
g153.t1	KAF5363882.1hypothetical protein D9756_000458	3	4.05e-166	83.99	5	P:GO:0034975; F:GO:0030544; C:GO:0005783; C:GO:0016020	P:protein folding in endoplasmic reticulum; F:Hsp70 protein binding; C:endoplasmic reticulum; C:membrane
g154.t1	KXN89663.1RNA polymerase I-specific transcription initiation factor rrn7	3	9.53e-28	61.99	8	P:GO:0001188; P:GO:0006360; F:GO:0001164; F:GO:0003677; F:GO:0046872; C:GO:0005634; C:GO:0005730; C:GO:0070860	P:RNA polymerase I preinitiation complex assembly; P:transcription by RNA polymerase I; F:RNA polymerase I core promoter sequence-specific DNA binding; F:DNA binding; F:metal ion binding; C:nucleus; C:nucleolus; C:RNA polymerase I core factor complex
g155.t1	KAF5363888.1hypothetical protein D9756_000456	3	8.09e-131	69.63
g156.t1	KAF5363889.1hypothetical protein D9756_000455	3	0	76.14	2	F:GO:0016779	F:nucleotidyltransferase activity	EC:2.7.7	Transferring phosphorus-containing groups
g157.t1	KAF5361038.1hypothetical protein D9756_004853	3	7.71e-57	81.04	10	P:GO:0006273; P:GO:0016233; P:GO:0060249; P:GO:0065008; P:GO:1902975; P:GO:1902981; F:GO:0046982; C:GO:0000785; C:GO:0005635; C:GO:0005658	P:lagging strand elongation; P:telomere capping; P:anatomical structure homeostasis; P:regulation of biological quality; P:mitotic DNA replication initiation; P:obsolete synthesis of RNA primer involved in mitotic DNA replication; F:protein heterodimerization activity; C:chromatin; C:nuclear envelope; C:alpha DNA polymerase:primase complex
g158.t1	KAF5361039.1hypothetical protein D9756_004852	3	0	72.8	44	P:GO:0001934; P:GO:0007015; P:GO:0008284; P:GO:0008286; P:GO:0009987; P:GO:0010564; P:GO:0010606; P:GO:0010748; P:GO:0010918; P:GO:0018105; P:GO:0030242; P:GO:0030335; P:GO:0031334; P:GO:0031340; P:GO:0032000; P:GO:0032186; P:GO:0035556; P:GO:0043066; P:GO:0045444; P:GO:0045725; P:GO:0046326; P:GO:0048731; P:GO:0060211; P:GO:0060237; P:GO:0060644; P:GO:0065002; P:GO:0090087; P:GO:0090314; P:GO:00…	P:positive regulation of protein phosphorylation; P:actin filament organization; P:positive regulation of cell population proliferation; P:insulin receptor signaling pathway; P:cellular process; P:regulation of cell cycle process; P:positive regulation of cytoplasmic mRNA processing body assembly; P:negative regulation of long-chain fatty acid import across plasma membrane; P:positive regulation …	EC:2.7.11.13	protein kinase C
g159.t1	KAJ3558725.1hypothetical protein NP233_g11451	3	0	81.88	10	P:GO:0007089; P:GO:0007265; P:GO:0048869; P:GO:0065009; F:GO:0005085; F:GO:0031267; C:GO:0005634; C:GO:0005789; C:GO:0005829; C:GO:0005886	P:traversing start control point of mitotic cell cycle; P:Ras protein signal transduction; P:cellular developmental process; P:regulation of molecular function; F:guanyl-nucleotide exchange factor activity; F:small GTPase binding; C:nucleus; C:endoplasmic reticulum membrane; C:cytosol; C:plasma membrane
g160.t1	KAJ3558725.1hypothetical protein NP233_g11451	3	0	88.49	8	P:GO:0022618; P:GO:0042256; F:GO:0003924; F:GO:0005525; F:GO:0032550; C:GO:0005829	P:protein-RNA complex assembly; P:cytosolic ribosome assembly; F:GTPase activity; F:GTP binding; F:purine ribonucleoside binding; C:cytosol	EC:3.6.1.15	nucleoside-triphosphate phosphatase
g161.t1	RXW22882.1hypothetical protein EST38_g2994	3	0	76.97	5	P:GO:0045292; F:GO:0016757; C:GO:0005684; C:GO:0071014	P:mRNA cis splicing, via spliceosome; F:glycosyltransferase activity; C:U2-type spliceosomal complex; C:post-mRNA release spliceosomal complex	EC:2.4	Glycosyltransferases
g162.t1	KAF5360655.1hypothetical protein D9756_004846	3	0	82.72	6	P:GO:0007165; F:GO:0000166; F:GO:0016301	P:signal transduction; F:nucleotide binding; F:kinase activity	EC:2.7	Transferring phosphorus-containing groups
g163.t1	KAJ3576297.1hypothetical protein NP233_g544	3	2e-183	87.94	2	C:GO:0016020	C:membrane
g164.t1	KAF5360653.1hypothetical protein D9756_004844	3	7.21e-223	82.37	1	C:GO:0016020	C:membrane
g165.t1	KAJ3576299.1hypothetical protein NP233_g546	3	5.46e-43	70.04	2	C:GO:0005634; C:GO:0005737	C:nucleus; C:cytoplasm
g166.t1	KAJ3576108.1hypothetical protein NP233_g672	3	1.34e-43	61.18
g167.t1	KAF9451553.1gamma-tubulin complex component 2	3	0	89.49	29	P:GO:0007020; P:GO:0031122; P:GO:0051128; P:GO:0051321; P:GO:0051415; P:GO:0071963; P:GO:0090307; P:GO:0098863; P:GO:1990734; F:GO:0005200; F:GO:0043015; F:GO:0043130; C:GO:0000922; C:GO:0000923; C:GO:0000930; C:GO:0005737; C:GO:0005816; C:GO:0005824; C:GO:0005874; C:GO:0008275; C:GO:0031021; C:GO:0061496; C:GO:0061497; C:GO:0071957	P:microtubule nucleation; P:cytoplasmic microtubule organization; P:regulation of cellular component organization; P:meiotic cell cycle; P:microtubule nucleation by interphase microtubule organizing center; P:establishment or maintenance of cell polarity regulating cell shape; P:mitotic spindle assembly; P:nuclear migration by microtubule mediated pushing forces; P:astral microtubule anchoring at…
g169.t1	KAJ3560359.1hypothetical protein NP233_g10892	3	2.21e-148	76.74	1	F:GO:0097159	F:organic cyclic compound binding
g171.t1	RDB24293.1hypothetical protein Hypma_008795	3	4.76e-140	74.39	6	F:GO:0004497; F:GO:0005506; F:GO:0016491; F:GO:0016705; F:GO:0020037; F:GO:0046872	F:monooxygenase activity; F:iron ion binding; F:oxidoreductase activity; F:oxidoreductase activity, acting on paired donors, with incorporation or reduction of molecular oxygen; F:heme binding; F:metal ion binding
g172.t1	KAJ3562976.1hypothetical protein NP233_g9237	3	0	75.9	10	P:GO:0044237; P:GO:2001057; F:GO:0016491; F:GO:0046872; F:GO:0050464; F:GO:0097159	P:cellular metabolic process; P:reactive nitrogen species metabolic process; F:oxidoreductase activity; F:metal ion binding; F:nitrate reductase (NADPH) activity; F:organic cyclic compound binding	EC:1.7.1.2; EC:1.7.1.3; EC:1.7.99.4	nitrate reductase [NAD(P)H]; nitrate reductase (NADPH); Acting on other nitrogenous compounds as donors
g173.t1	KAJ3570359.1hypothetical protein NP233_g4444	3	4.77e-81	95.77	4	P:GO:0006357; F:GO:0000981; F:GO:0003677; F:GO:0008270	P:regulation of transcription by RNA polymerase II; F:DNA-binding transcription factor activity, RNA polymerase II-specific; F:DNA binding; F:zinc ion binding
g174.t1	KXN90608.1Basic leucine zipper and W2 domain-containing protein 1-A	3	2.78e-130	92.1
g175.t1	KXN90608.1Basic leucine zipper and W2 domain-containing protein 1-A	3	8.76e-74	91.19
g176.t1	KAF5354724.1hypothetical protein D9756_005274	3	4.25e-228	75.86	3	P:GO:0055085; F:GO:0022857; C:GO:0005886	P:transmembrane transport; F:transmembrane transporter activity; C:plasma membrane
g177.t1	KAF5347006.1hypothetical protein D9756_011009	3	1.33e-08	72.86	1	F:GO:0003824	F:catalytic activity
g178.t1	KAJ3575991.1hypothetical protein NP233_g729	3	0	67.77	6	P:GO:0006338; F:GO:0000166; F:GO:0005524; F:GO:0016787; F:GO:0140658; C:GO:0005634	P:chromatin remodeling; F:nucleotide binding; F:ATP binding; F:hydrolase activity; F:ATP-dependent chromatin remodeler activity; C:nucleus	EC:2.7.1.67	1-phosphatidylinositol 4-kinase
g179.t1	KXN85675.1hypothetical protein AN958_10858	3	2.48e-50	77.12	6	P:GO:0006396; F:GO:0003723; F:GO:0004525	P:RNA processing; F:RNA binding; F:ribonuclease III activity	EC:3.1.30; EC:3.1.26.3	Acting on ester bonds; ribonuclease III
g180.t1	KAF5352561.1hypothetical protein D9756_006063	3	0	74.88	24	P:GO:0000122; P:GO:0000183; P:GO:0022607; P:GO:0030466; P:GO:0031508; P:GO:0034728; P:GO:0070647; P:GO:0071103; F:GO:0000166; F:GO:0005524; F:GO:0008094; F:GO:0016787; F:GO:0016887; F:GO:0031491; F:GO:0061659; F:GO:0140658; C:GO:0000228; C:GO:0005721; C:GO:0017053; C:GO:0031934; C:GO:0033553; C:GO:0043229; C:GO:0070824; C:GO:0099115	P:negative regulation of transcription by RNA polymerase II; P:rDNA heterochromatin formation; P:cellular component assembly; P:silent mating-type cassette heterochromatin formation; P:pericentric heterochromatin formation; P:nucleosome organization; P:protein modification by small protein conjugation or removal; P:DNA conformation change; F:nucleotide binding; F:ATP binding; F:ATP-dependent acti…	EC:3.6.1.15; EC:2.3.2	nucleoside-triphosphate phosphatase; Acyltransferases
g181.t1	KAF5352783.1hypothetical protein D9756_006065	3	0	69.73	22	P:GO:0000920; P:GO:0006612; P:GO:0006886; P:GO:0006887; P:GO:0006893; P:GO:0006897; P:GO:0015833; P:GO:0032120; P:GO:0044703; P:GO:0048309; P:GO:0048313; P:GO:0051641; P:GO:0090522; C:GO:0000131; C:GO:0000145; C:GO:0005628; C:GO:0005934; C:GO:0005935; C:GO:0032153; C:GO:0043332; C:GO:0051285; C:GO:0090619	P:septum digestion after cytokinesis; P:protein targeting to membrane; P:intracellular protein transport; P:exocytosis; P:Golgi to plasma membrane transport; P:endocytosis; P:peptide transport; P:ascospore-type prospore membrane formation; P:multi-organism reproductive process; P:endoplasmic reticulum inheritance; P:Golgi inheritance; P:cellular localization; P:vesicle tethering involved in exocy…
g182.t1	KAF5352563.1hypothetical protein D9756_006067	3	6.86e-255	95.38	6	F:GO:0005524; F:GO:0016874; F:GO:0046872	F:ATP binding; F:ligase activity; F:metal ion binding	EC:6	Ligases
g183.t1	KAF5352592.1hypothetical protein D9756_006070	3	3.75e-225	76.82	6	P:GO:0002943; P:GO:0008033; F:GO:0016491; F:GO:0017150; C:GO:0005634; C:GO:0005737	P:tRNA dihydrouridine synthesis; P:tRNA processing; F:oxidoreductase activity; F:tRNA dihydrouridine synthase activity; C:nucleus; C:cytoplasm	EC:1.3.1	Acting on the CH-CH group of donors
g184.t1	KXN85686.1hypothetical protein AN958_10869	3	2.78e-229	89.07	16	P:GO:0006457; P:GO:0006915; P:GO:0009267; P:GO:0034605; P:GO:0036503; P:GO:0043161; P:GO:0044248; F:GO:0005509; F:GO:0051082; C:GO:0000324; C:GO:0005783; C:GO:0005789; C:GO:0016020	P:protein folding; P:apoptotic process; P:cellular response to starvation; P:cellular response to heat; P:ERAD pathway; P:proteasome-mediated ubiquitin-dependent protein catabolic process; P:cellular catabolic process; F:calcium ion binding; F:unfolded protein binding; C:fungal-type vacuole; C:endoplasmic reticulum; C:endoplasmic reticulum membrane; C:membrane
g185.t1	KXN85686.1hypothetical protein AN958_10869	3	0	81.94	33	P:GO:0000244; P:GO:0000349; P:GO:0000388; P:GO:0006397; P:GO:0006414; P:GO:0006457; P:GO:0008380; P:GO:0033044; P:GO:0044087; P:GO:1902802; F:GO:0003746; F:GO:0003924; F:GO:0005509; F:GO:0005525; F:GO:0030623; F:GO:0032550; F:GO:0051082; C:GO:0000974; C:GO:0005634; C:GO:0005682; C:GO:0005783; C:GO:0016020; C:GO:0046540; C:GO:0071014	P:spliceosomal tri-snRNP complex assembly; P:generation of catalytic spliceosome for first transesterification step; P:spliceosome conformational change to release U4 (or U4atac) and U1 (or U11); P:mRNA processing; P:translational elongation; P:protein folding; P:RNA splicing; P:regulation of chromosome organization; P:regulation of cellular component biogenesis; P:regulation of siRNA-mediated fa…	EC:3.6.1.15	nucleoside-triphosphate phosphatase
g186.t1	KXN85688.1Alkali-sensitive linkage protein 1	3	1.9e-137	85.8	2	F:GO:0016787; C:GO:0016020	F:hydrolase activity; C:membrane	EC:3	Hydrolases
g187.t1	KAF5360975.1hypothetical protein D9756_004486	3	1.75e-36	62.09	3	F:GO:0003676; F:GO:0008270; C:GO:0005634	F:nucleic acid binding; F:zinc ion binding; C:nucleus
g188.t1	KAF7760507.1transcriptional regulator family: Zinc finger, CCHC-type	3	4.9e-55	61.72	3	F:GO:0003676; F:GO:0008270; C:GO:0005634	F:nucleic acid binding; F:zinc ion binding; C:nucleus
g189.t1	KAF7762597.1hypothetical protein Agabi119p4_9190	3	3.43e-61	79
g191.t1	KAF5351942.1hypothetical protein D9756_007598	3	0	72.56	16	P:GO:0007120; P:GO:0031107; P:GO:0031589; P:GO:0044182; P:GO:0051701; P:GO:0097271; F:GO:0005525; F:GO:0005546; F:GO:0032550; F:GO:0050839; C:GO:0000142; C:GO:0005621; C:GO:0009986; C:GO:0031097; C:GO:0031160; C:GO:0032168	P:axial cellular bud site selection; P:septin ring disassembly; P:cell-substrate adhesion; P:filamentous growth of a population of unicellular organisms; P:biological process involved in interaction with host; P:protein localization to bud neck; F:GTP binding; F:phosphatidylinositol-4,5-bisphosphate binding; F:purine ribonucleoside binding; F:cell adhesion molecule binding; C:cellular bud neck co…
g192.t1	KAF5351941.1hypothetical protein D9756_007599	3	7.9e-266	87.59	11	P:GO:0006625; P:GO:0006635; P:GO:0015833; P:GO:0016560; P:GO:0017038; F:GO:0005052; F:GO:0005515; F:GO:0030674; C:GO:0005777; C:GO:0005778; C:GO:0005829	P:protein targeting to peroxisome; P:fatty acid beta-oxidation; P:peptide transport; P:protein import into peroxisome matrix, docking; P:protein import; F:peroxisome matrix targeting signal-1 binding; F:protein binding; F:protein-macromolecule adaptor activity; C:peroxisome; C:peroxisomal membrane; C:cytosol
g193.t1	KAF5351973.1hypothetical protein D9756_007600	3	0	80.87	12	P:GO:0008652; P:GO:0009097; P:GO:0009099; F:GO:0004160; F:GO:0046872; F:GO:0051537	P:amino acid biosynthetic process; P:isoleucine biosynthetic process; P:valine biosynthetic process; F:dihydroxy-acid dehydratase activity; F:metal ion binding; F:2 iron, 2 sulfur cluster binding	EC:4.2.1.9	dihydroxy-acid dehydratase
g194.t1	KAF5351689.1hypothetical protein D9756_007604	3	0	76.96	1	F:GO:0003729	F:mRNA binding
g195.t1	KAF5351969.1hypothetical protein D9756_007608	3	0	52.26	9	P:GO:0010628; P:GO:0045944; P:GO:0055081; P:GO:0055089; P:GO:0065008; P:GO:0071456; P:GO:2001280; C:GO:0032991; C:GO:0098554	P:positive regulation of gene expression; P:positive regulation of transcription by RNA polymerase II; P:monoatomic anion homeostasis; P:fatty acid homeostasis; P:regulation of biological quality; P:cellular response to hypoxia; P:positive regulation of unsaturated fatty acid biosynthetic process; C:protein-containing complex; C:cytoplasmic side of endoplasmic reticulum membrane
g196.t1	KAF5351968.1hypothetical protein D9756_007609	3	7.87e-83	57.68
g197.t1	KAF5351762.1hypothetical protein D9756_007610	3	8.83e-119	55.34	7	P:GO:0015031; P:GO:0046907; P:GO:0051028; C:GO:0005634; C:GO:0005643; C:GO:0032991; C:GO:0043229	P:protein transport; P:intracellular transport; P:mRNA transport; C:nucleus; C:nuclear pore; C:protein-containing complex; C:intracellular organelle
g199.t1	KAJ3560359.1hypothetical protein NP233_g10892	3	8.52e-281	81.13	1	F:GO:0003676	F:nucleic acid binding
g200.t1	KAJ3561033.1hypothetical protein NP233_g10445	3	5.11e-30	61.21	1	F:GO:0003824	F:catalytic activity
g202.t1	KAF5345218.1hypothetical protein D9756_011551	3	1.39e-43	77.81	2	F:GO:0005488; C:GO:0043227	F:binding; C:membrane-bounded organelle
g204.t1	KAF5355170.1hypothetical protein D9756_005697	3	6.39e-254	84.76	9	P:GO:0006508; P:GO:0030154; P:GO:0043936; F:GO:0004252; F:GO:0019863; C:GO:0005622; C:GO:0110165	P:proteolysis; P:cell differentiation; P:asexual sporulation resulting in formation of a cellular spore; F:serine-type endopeptidase activity; F:IgE binding; C:intracellular anatomical structure; C:cellular anatomical entity	EC:3.4.21	Acting on peptide bonds (peptidases)
g205.t1	KAF5355156.1hypothetical protein D9756_005739	3	2.53e-100	74	4	P:GO:0009166; F:GO:0000166; F:GO:0003824; F:GO:0016787	P:nucleotide catabolic process; F:nucleotide binding; F:catalytic activity; F:hydrolase activity	EC:3.1.3.5	5'-nucleotidase
g206.t1	KAJ3562419.1hypothetical protein NP233_g9587	3	4.81e-166	63.51
g207.t1	KAJ3562419.1hypothetical protein NP233_g9587	3	3.45e-96	81.9
g208.t1	KXN87350.1GTP-binding protein rho2	3	1.39e-213	71.06	20	P:GO:0007015; P:GO:0007017; P:GO:0007264; P:GO:0030010; P:GO:0030950; P:GO:0031505; P:GO:0032949; P:GO:0051128; P:GO:0071963; F:GO:0003924; F:GO:0005525; F:GO:0032550; C:GO:0016020; C:GO:0030427; C:GO:0032153; C:GO:0051286; C:GO:0071944	P:actin filament organization; P:microtubule-based process; P:small GTPase-mediated signal transduction; P:establishment of cell polarity; P:establishment or maintenance of actin cytoskeleton polarity; P:fungal-type cell wall organization; P:regulation of alpha-glucan biosynthetic process; P:regulation of cellular component organization; P:establishment or maintenance of cell polarity regulating …	EC:3.6.1.15	nucleoside-triphosphate phosphatase
g209.t1	KAJ3569830.1hypothetical protein NP233_g4792	3	1.58e-24	75.21	8	P:GO:0006805; P:GO:0009102; P:GO:0044572; P:GO:0051604; F:GO:0005506; F:GO:0051537; F:GO:0051539; C:GO:0005759	P:xenobiotic metabolic process; P:biotin biosynthetic process; P:[4Fe-4S] cluster assembly; P:protein maturation; F:iron ion binding; F:2 iron, 2 sulfur cluster binding; F:4 iron, 4 sulfur cluster binding; C:mitochondrial matrix
g210.t1	KAJ3569833.1hypothetical protein NP233_g4791	3	4.06e-162	79.2	2	P:GO:0045292; C:GO:0005681	P:mRNA cis splicing, via spliceosome; C:spliceosomal complex
g211.t1	KAJ3569832.1hypothetical protein NP233_g4790	3	2.7e-114	65.06	1	C:GO:0016020	C:membrane
g212.t1	KAF8960222.1proline iminopeptidase	3	2.87e-131	77.37
g213.t1	KXN81630.1L-amino acid amidase	3	2.56e-153	84.16	4	P:GO:0006508; F:GO:0008233	P:proteolysis; F:peptidase activity	EC:3.4	Acting on peptide bonds (peptidases)
g214.t1	KAF8629453.1hypothetical protein AX17_005656	2	1.09e-07	67.68
g215.t1	KAJ3560477.1hypothetical protein NP233_g10816	3	1.29e-151	85.45	3	F:GO:0003676; F:GO:0008270; C:GO:0005634	F:nucleic acid binding; F:zinc ion binding; C:nucleus
g217.t1	KAF5355103.1hypothetical protein D9756_005773	3	3.24e-153	83.74	16	P:GO:0000747; P:GO:0006338; P:GO:0006357; P:GO:0018393; P:GO:0044703; P:GO:0051276; F:GO:0005198; F:GO:0046982; C:GO:0000124; C:GO:0000228; C:GO:0005654; C:GO:0005739; C:GO:0046695	P:conjugation with cellular fusion; P:chromatin remodeling; P:regulation of transcription by RNA polymerase II; P:internal peptidyl-lysine acetylation; P:multi-organism reproductive process; P:chromosome organization; F:structural molecule activity; F:protein heterodimerization activity; C:SAGA complex; C:nuclear chromosome; C:nucleoplasm; C:mitochondrion; C:SLIK (SAGA-like) complex
g218.t1	XP_025556581.1hypothetical protein BO97DRAFT_430433	3	7.96e-06	52.13
g219.t1	KAJ3567408.1hypothetical protein NP233_g6388	3	4.84e-194	67.98	2	F:GO:0016787	F:hydrolase activity	EC:3	Hydrolases
g220.t1	KAF5359090.1hypothetical protein D9756_003470	3	3.04e-179	84.36	3	P:GO:0055085; F:GO:0022857; C:GO:0016020	P:transmembrane transport; F:transmembrane transporter activity; C:membrane
g221.t1	KAJ3567406.1hypothetical protein NP233_g6385	3	0	74.61	5	P:GO:0006979; P:GO:0034599; C:GO:0005634; C:GO:0005737	P:response to oxidative stress; P:cellular response to oxidative stress; C:nucleus; C:cytoplasm
g222.t1	KAF5359769.1hypothetical protein D9756_003466	3	8.16e-105	77.28
g223.t1	KAF5359557.1hypothetical protein D9756_003465	3	5.07e-197	83.95	5	P:GO:0036503; P:GO:0043161; P:GO:0044248; C:GO:0005634; C:GO:0005737	P:ERAD pathway; P:proteasome-mediated ubiquitin-dependent protein catabolic process; P:cellular catabolic process; C:nucleus; C:cytoplasm
g224.t1	KAF9449527.1CRAL/TRIO domain-containing protein	3	3.5e-170	81.89
g225.t1	KAF5364214.1hypothetical protein D9756_000718	3	2.51e-157	69	2	P:GO:0019346; F:GO:0030170	P:transsulfuration; F:pyridoxal phosphate binding
g226.t1	KAF5364214.1hypothetical protein D9756_000718	3	1.4e-204	73.73	3	P:GO:0006351; F:GO:0003677; F:GO:0008270	P:DNA-templated transcription; F:DNA binding; F:zinc ion binding
g227.t1	KAF5363690.1hypothetical protein D9756_000720	3	0	92.86	9	P:GO:0000447; P:GO:0000472; P:GO:0000480; P:GO:0042254; F:GO:0030515; F:GO:1901363; C:GO:0005730; C:GO:0032040; C:GO:0034388	P:endonucleolytic cleavage in ITS1 to separate SSU-rRNA from 5.8S rRNA and LSU-rRNA from tricistronic rRNA transcript (SSU-rRNA, 5.8S rRNA, LSU-rRNA); P:endonucleolytic cleavage to generate mature 5'-end of SSU-rRNA from (SSU-rRNA, 5.8S rRNA, LSU-rRNA); P:endonucleolytic cleavage in 5'-ETS of tricistronic rRNA transcript (SSU-rRNA, 5.8S rRNA, LSU-rRNA); P:ribosome biogenesis; F:snoRNA binding; F:…
g228.t1	KAF5363689.1hypothetical protein D9756_000721	3	2.07E-311	92.89	12	P:GO:0006508; P:GO:0006518; P:GO:0034641; P:GO:0061077; F:GO:0004177; F:GO:0008237; F:GO:0008270; F:GO:0070006; C:GO:0000328; C:GO:0005576	P:proteolysis; P:peptide metabolic process; P:cellular nitrogen compound metabolic process; P:chaperone-mediated protein folding; F:aminopeptidase activity; F:metallopeptidase activity; F:zinc ion binding; F:metalloaminopeptidase activity; C:fungal-type vacuole lumen; C:extracellular region	EC:3.4.11	Acting on peptide bonds (peptidases)
g229.t1	KAF5363692.1hypothetical protein D9756_000722	3	6.72e-53	43.79	8	P:GO:0006364; P:GO:0042274; F:GO:0030515; F:GO:0042134; F:GO:0043047; F:GO:1901363; C:GO:0032040; C:GO:0034457	P:rRNA processing; P:ribosomal small subunit biogenesis; F:snoRNA binding; F:rRNA primary transcript binding; F:single-stranded telomeric DNA binding; F:heterocyclic compound binding; C:small-subunit processome; C:Mpp10 complex
g230.t1	XP_007329543.1hypothetical protein AGABI1DRAFT_113572	3	9.8e-84	70.91
g231.t1	KAJ3567781.1hypothetical protein NP233_g6129	3	8.43e-112	96.49	13	P:GO:0009966; P:GO:0010523; P:GO:0035584; P:GO:0042327; P:GO:0043085; P:GO:1905949; F:GO:0005509; F:GO:0098744; C:GO:0000139; C:GO:0005829; C:GO:0005886; C:GO:0098791	P:regulation of signal transduction; P:negative regulation of calcium ion transport into cytosol; P:calcium-mediated signaling using intracellular calcium source; P:positive regulation of phosphorylation; P:positive regulation of catalytic activity; P:negative regulation of calcium ion import across plasma membrane; F:calcium ion binding; F:1-phosphatidylinositol 4-kinase activator activity; C:Go…
g232.t1	KAJ3567788.1hypothetical protein NP233_g6130	3	1.27e-180	93.67	3	P:GO:0034975; C:GO:0016020; C:GO:0072546	P:protein folding in endoplasmic reticulum; C:membrane; C:EMC complex
g233.t1	KAF5364246.1hypothetical protein D9756_000730	3	1.15e-284	91.63	3	P:GO:0071805; F:GO:0015079; C:GO:0005886	P:potassium ion transmembrane transport; F:potassium ion transmembrane transporter activity; C:plasma membrane
g234.t1	KAJ3567791.1hypothetical protein NP233_g6133	3	6.89e-215	90.73	10	P:GO:0002181; P:GO:1903833; F:GO:0003924; F:GO:0005515; F:GO:0005525; F:GO:0032550; C:GO:0010494; C:GO:1990904	P:cytoplasmic translation; P:positive regulation of cellular response to amino acid starvation; F:GTPase activity; F:protein binding; F:GTP binding; F:purine ribonucleoside binding; C:cytoplasmic stress granule; C:ribonucleoprotein complex	EC:3.6.1.15	nucleoside-triphosphate phosphatase
g235.t1	KAF5360506.1hypothetical protein D9756_004888	3	5.96e-107	82.43
g236.t1	KAF5360509.1hypothetical protein D9756_004885	3	1.95e-136	85.36
g237.t1	KAF5360514.1hypothetical protein D9756_004882	3	2.99e-274	91.29	3	C:GO:0005815; C:GO:0005869; C:GO:0030017	C:microtubule organizing center; C:dynactin complex; C:sarcomere
g238.t1	KAF5361085.1hypothetical protein D9756_004879	3	0	80.14	2	F:GO:0008233	F:peptidase activity	EC:3.4	Acting on peptide bonds (peptidases)
g239.t1	KAF5361086.1hypothetical protein D9756_004878	3	2.06e-75	80.3	3	P:GO:0006788; F:GO:0004392; F:GO:0046872	P:heme oxidation; F:heme oxygenase (decyclizing) activity; F:metal ion binding	EC:1.14.15.20	heme oxygenase (biliverdin-producing, ferredoxin)
g240.t1	KAF5352693.1hypothetical protein D9756_006021	3	5.11e-168	71.06	20	P:GO:0001410; P:GO:0002666; P:GO:0006357; P:GO:0007165; P:GO:0010106; P:GO:0036178; P:GO:0036244; P:GO:0044409; P:GO:0044416; P:GO:0051094; P:GO:0065008; P:GO:0071280; P:GO:0071285; P:GO:0071466; P:GO:0071469; P:GO:1900439; P:GO:2000026; F:GO:0043565; F:GO:1901363; C:GO:0005634	P:chlamydospore formation; P:positive regulation of T cell tolerance induction; P:regulation of transcription by RNA polymerase II; P:signal transduction; P:cellular response to iron ion starvation; P:filamentous growth of a population of unicellular organisms in response to neutral pH; P:cellular response to neutral pH; P:symbiont entry into host; P:obsolete induction by symbiont of host defense…
g241.t1	KAF5352466.1hypothetical protein D9756_006018	3	2.48e-123	83.92	4	P:GO:0006629; F:GO:0008081	P:lipid metabolic process; F:phosphoric diester hydrolase activity	EC:3.1.4	Acting on ester bonds
g242.t1	KAF5352459.1hypothetical protein D9756_006017	3	4.48e-73	72.43	7	P:GO:0000447; P:GO:0000472; P:GO:0000480; F:GO:0030515; F:GO:1901363; C:GO:0005730; C:GO:0032040	P:endonucleolytic cleavage in ITS1 to separate SSU-rRNA from 5.8S rRNA and LSU-rRNA from tricistronic rRNA transcript (SSU-rRNA, 5.8S rRNA, LSU-rRNA); P:endonucleolytic cleavage to generate mature 5'-end of SSU-rRNA from (SSU-rRNA, 5.8S rRNA, LSU-rRNA); P:endonucleolytic cleavage in 5'-ETS of tricistronic rRNA transcript (SSU-rRNA, 5.8S rRNA, LSU-rRNA); F:snoRNA binding; F:heterocyclic compound b…
g243.t1	KAF5352460.1hypothetical protein D9756_006016	3	6.94e-76	75.92
g244.t1	KAF5352457.1hypothetical protein D9756_006015	3	1.09e-167	73.44	6	P:GO:0006810; P:GO:0006897; P:GO:0007015; P:GO:0009987; C:GO:0030479; C:GO:0099568	P:transport; P:endocytosis; P:actin filament organization; P:cellular process; C:actin cortical patch; C:cytoplasmic region
g245.t1	KAF5352458.1hypothetical protein D9756_006014	3	5.93e-238	78.88	8	P:GO:0006418; P:GO:0019752; P:GO:0070158; F:GO:0000166; F:GO:0004812; F:GO:0004828; F:GO:0005524; C:GO:0005739	P:tRNA aminoacylation for protein translation; P:carboxylic acid metabolic process; P:mitochondrial seryl-tRNA aminoacylation; F:nucleotide binding; F:aminoacyl-tRNA ligase activity; F:serine-tRNA ligase activity; F:ATP binding; C:mitochondrion	EC:6.1.1.11	serine--tRNA ligase
g246.t1	KAF5352462.1hypothetical protein D9756_006010	3	0	69.2	2	F:GO:0003676; F:GO:0003723	F:nucleic acid binding; F:RNA binding
g247.t1	KAF5352403.1hypothetical protein D9756_006009	3	9.71e-96	93.1	13	P:GO:0006351; P:GO:0006354; P:GO:0006360; P:GO:0006366; P:GO:0042797; F:GO:0003677; F:GO:0003899; C:GO:0005665; C:GO:0005666; C:GO:0005736	P:DNA-templated transcription; P:DNA-templated transcription elongation; P:transcription by RNA polymerase I; P:transcription by RNA polymerase II; P:tRNA transcription by RNA polymerase III; F:DNA binding; F:DNA-directed 5'-3' RNA polymerase activity; C:RNA polymerase II, core complex; C:RNA polymerase III complex; C:RNA polymerase I complex	EC:2.7.7.6	DNA-directed RNA polymerase
g248.t1	KAF5352716.1hypothetical protein D9756_006008	3	5.67e-105	77.01	9	P:GO:0006476; P:GO:0031509; P:GO:0045892; P:GO:0046459; P:GO:1900239; P:GO:1900429; P:GO:1990414; F:GO:0017136; C:GO:0005634	P:protein deacetylation; P:subtelomeric heterochromatin formation; P:negative regulation of DNA-templated transcription; P:short-chain fatty acid metabolic process; P:regulation of phenotypic switching; P:negative regulation of filamentous growth of a population of unicellular organisms; P:replication-born double-strand break repair via sister chromatid exchange; F:NAD-dependent histone deacetyla…	EC:3.5.1.98	histone deacetylase
g249.t1	KAF5352721.1hypothetical protein D9756_006006	3	1.24e-195	84.5	6	P:GO:0071704; F:GO:0003723; F:GO:0033897	P:organic substance metabolic process; F:RNA binding; F:ribonuclease T2 activity	EC:3.1; EC:4.6.1.19	Acting on ester bonds; ribonuclease T2
g250.t1	KAF7981116.1hypothetical protein HWV62_34839	3	1.46e-23	49.61	22	P:GO:0000709; P:GO:0000730; P:GO:0006259; P:GO:0006311; P:GO:0006312; P:GO:0007130; P:GO:0010212; P:GO:0010520; P:GO:0042148; P:GO:0051260; P:GO:0060631; F:GO:0000150; F:GO:0000400; F:GO:0003690; F:GO:0003697; F:GO:0005524; F:GO:0016887; F:GO:0017116; F:GO:0042802; F:GO:1905334; C:GO:0000794; C:GO:0005654	P:meiotic joint molecule formation; P:DNA recombinase assembly; P:DNA metabolic process; P:meiotic gene conversion; P:mitotic recombination; P:synaptonemal complex assembly; P:response to ionizing radiation; P:regulation of reciprocal meiotic recombination; P:DNA strand invasion; P:protein homooligomerization; P:regulation of meiosis I; F:DNA strand exchange activity; F:four-way junction DNA bind…	EC:3.6.1.15	nucleoside-triphosphate phosphatase
g251.t1	KAF5352794.1hypothetical protein D9756_006005	3	1.72e-98	62.72	2	P:GO:0045292; C:GO:0005684	P:mRNA cis splicing, via spliceosome; C:U2-type spliceosomal complex
g252.t1	KAF9454079.1hypothetical protein P691DRAFT_717909	3	4.5e-115	94.7	1	C:GO:0016020	C:membrane
g253.t1	KXN86636.1hypothetical protein AN958_09940	3	8.29e-166	80.24	11	P:GO:0006338; P:GO:0006357; P:GO:0018393; P:GO:0051276; P:GO:1902680; F:GO:0003713; C:GO:0000124; C:GO:0005654; C:GO:0043229; C:GO:0046695; C:GO:1902562	P:chromatin remodeling; P:regulation of transcription by RNA polymerase II; P:internal peptidyl-lysine acetylation; P:chromosome organization; P:positive regulation of RNA biosynthetic process; F:transcription coactivator activity; C:SAGA complex; C:nucleoplasm; C:intracellular organelle; C:SLIK (SAGA-like) complex; C:H4 histone acetyltransferase complex
g254.t1	KAF5361763.1hypothetical protein D9756_002515	3	0	81.82	10	P:GO:0005980; P:GO:0044248; F:GO:0004133; F:GO:0004134; F:GO:0004135; C:GO:0005737; C:GO:0005739	P:glycogen catabolic process; P:cellular catabolic process; F:glycogen debranching enzyme activity; F:4-alpha-glucanotransferase activity; F:amylo-alpha-1,6-glucosidase activity; C:cytoplasm; C:mitochondrion	EC:2.4.1.25; EC:3.2.1.20; EC:3.2.1.33	4-alpha-glucanotransferase; alpha-glucosidase; amylo-alpha-1,6-glucosidase
g255.t1	KAJ3564099.1hypothetical protein NP233_g8512	3	4.57e-82	81.25	16	P:GO:0006338; P:GO:0006352; P:GO:0006357; P:GO:0018393; P:GO:0051123; P:GO:0051276; F:GO:0003682; F:GO:0005198; F:GO:0005515; F:GO:0060090; F:GO:0140110; C:GO:0000124; C:GO:0000228; C:GO:0005634; C:GO:0005669; C:GO:0046695	P:chromatin remodeling; P:DNA-templated transcription initiation; P:regulation of transcription by RNA polymerase II; P:internal peptidyl-lysine acetylation; P:RNA polymerase II preinitiation complex assembly; P:chromosome organization; F:chromatin binding; F:structural molecule activity; F:protein binding; F:molecular adaptor activity; F:transcription regulator activity; C:SAGA complex; C:nuclea…
g256.t1	KAJ3561446.1hypothetical protein NP233_g10187	3	0	84.6	14	P:GO:0000290; P:GO:0001731; P:GO:0033962; P:GO:0045947; F:GO:0003682; F:GO:0003729; F:GO:0005515; F:GO:1901363; C:GO:0000776; C:GO:0000932; C:GO:0005634; C:GO:0010494; C:GO:0022627; C:GO:1990726	P:deadenylation-dependent decapping of nuclear-transcribed mRNA; P:formation of translation preinitiation complex; P:P-body assembly; P:negative regulation of translational initiation; F:chromatin binding; F:mRNA binding; F:protein binding; F:heterocyclic compound binding; C:kinetochore; C:P-body; C:nucleus; C:cytoplasmic stress granule; C:cytosolic small ribosomal subunit; C:Lsm1-7-Pat1 complex
g257.t1	KAF5361943.1hypothetical protein D9756_002511	3	0	66.01	10	P:GO:0006364; P:GO:0032543; F:GO:0003725; F:GO:0003735; F:GO:0004525; F:GO:1901363; C:GO:0005762	P:rRNA processing; P:mitochondrial translation; F:double-stranded RNA binding; F:structural constituent of ribosome; F:ribonuclease III activity; F:heterocyclic compound binding; C:mitochondrial large ribosomal subunit	EC:3.1.30; EC:3.1.26.3	Acting on ester bonds; ribonuclease III
g258.t1	KAF5361761.1hypothetical protein D9756_002513	3	0	76.62	11	P:GO:0007165; P:GO:0007264; P:GO:0030950; P:GO:0043547; F:GO:0005096; C:GO:0000935; C:GO:0005934; C:GO:0005935; C:GO:0031097; C:GO:0035838; C:GO:0051285	P:signal transduction; P:small GTPase-mediated signal transduction; P:establishment or maintenance of actin cytoskeleton polarity; P:positive regulation of GTPase activity; F:GTPase activator activity; C:division septum; C:cellular bud tip; C:cellular bud neck; C:medial cortex; C:growing cell tip; C:cell cortex of cell tip
g259.t1	KXN85439.1hypothetical protein AN958_11335	3	2.83e-37	59.84
g263.t1	KAF7762692.1hypothetical protein Agabi119p4_9285	3	3.47e-178	77.78	4	P:GO:0015074; F:GO:0003676; F:GO:0003723; C:GO:0005634	P:DNA integration; F:nucleic acid binding; F:RNA binding; C:nucleus
g264.t1	KAJ3558519.1hypothetical protein NP233_g11494	3	0	94.15	16	P:GO:0031331; P:GO:0032436; P:GO:0042176; P:GO:0045842; P:GO:0051781; P:GO:0062033; F:GO:0005515; F:GO:0030234; F:GO:0030674; C:GO:0005783; C:GO:0008540; C:GO:0031597; C:GO:0034399; C:GO:0034515	P:positive regulation of cellular catabolic process; P:positive regulation of proteasomal ubiquitin-dependent protein catabolic process; P:regulation of protein catabolic process; P:positive regulation of mitotic metaphase/anaphase transition; P:positive regulation of cell division; P:positive regulation of mitotic sister chromatid segregation; F:protein binding; F:enzyme regulator activity; F:pr…
g265.t1	KAF5351214.1hypothetical protein D9756_008427	3	0	85.16	13	P:GO:0000902; P:GO:0007015; P:GO:0007118; P:GO:0032989; P:GO:0048869; P:GO:0051128; P:GO:2000100; C:GO:0000131; C:GO:0005739; C:GO:0005933; C:GO:0031097; C:GO:0043332; C:GO:1902716	P:cell morphogenesis; P:actin filament organization; P:budding cell apical bud growth; P:cellular anatomical entity morphogenesis; P:cellular developmental process; P:regulation of cellular component organization; P:regulation of establishment or maintenance of bipolar cell polarity regulating cell shape; C:incipient cellular bud site; C:mitochondrion; C:cellular bud; C:medial cortex; C:mating pr…
g266.t1	KAJ3574331.1hypothetical protein NP233_g1848	3	2.87e-233	86.18	22	P:GO:0000710; P:GO:0000713; P:GO:0006298; P:GO:0007131; P:GO:0061982; F:GO:0003697; F:GO:0005524; F:GO:0016887; F:GO:0030983; F:GO:0140664; C:GO:0000795; C:GO:0005634; C:GO:0005712; C:GO:0005739; C:GO:0032300; C:GO:0032389; C:GO:0097587; C:GO:1990391	P:meiotic mismatch repair; P:meiotic heteroduplex formation; P:mismatch repair; P:reciprocal meiotic recombination; P:meiosis I cell cycle process; F:single-stranded DNA binding; F:ATP binding; F:ATP hydrolysis activity; F:mismatched DNA binding; F:ATP-dependent DNA damage sensor activity; C:synaptonemal complex; C:nucleus; C:chiasma; C:mitochondrion; C:mismatch repair complex; C:MutLalpha comple…	EC:3.6.1.15	nucleoside-triphosphate phosphatase
g267.t1	KAF5351215.1hypothetical protein D9756_008424	3	0	72.03	13	P:GO:0006417; P:GO:0016567; P:GO:0019538; P:GO:0031509; P:GO:0044248; P:GO:0045892; P:GO:0072344; P:GO:1990116; F:GO:0008270; F:GO:0043023; F:GO:0061630; C:GO:0005634; C:GO:1990112	P:regulation of translation; P:protein ubiquitination; P:protein metabolic process; P:subtelomeric heterochromatin formation; P:cellular catabolic process; P:negative regulation of DNA-templated transcription; P:rescue of stalled ribosome; P:ribosome-associated ubiquitin-dependent protein catabolic process; F:zinc ion binding; F:ribosomal large subunit binding; F:ubiquitin protein ligase activity…	EC:2.3.2	Acyltransferases
g268.t1	CDJ79831.1rhamnogalacturonan endolyase precursor	3	0	93.76	8	P:GO:0000272; F:GO:0030246; F:GO:0102210; C:GO:0005576	P:polysaccharide catabolic process; F:carbohydrate binding; F:rhamnogalacturonan endolyase activity; C:extracellular region	EC:4.2.2.23	rhamnogalacturonan endolyase
g269.t1	KAF5351029.1hypothetical protein D9756_008418	3	5.96e-128	80.02	4	P:GO:0016311; P:GO:0030148; F:GO:0042392; C:GO:0005789	P:dephosphorylation; P:sphingolipid biosynthetic process; F:sphingosine-1-phosphate phosphatase activity; C:endoplasmic reticulum membrane	EC:3.1.3	Acting on ester bonds
g270.t1	KAF5362124.1hypothetical protein D9756_002482	3	5.67e-257	84.44	9	P:GO:0006207; P:GO:0044205; P:GO:0046132; F:GO:0106430; C:GO:0005743	P:'de novo' pyrimidine nucleobase biosynthetic process; P:'de novo' UMP biosynthetic process; P:pyrimidine ribonucleoside biosynthetic process; F:dihydroorotate dehydrogenase (quinone) activity; C:mitochondrial inner membrane	EC:1.3.5.2	dihydroorotate dehydrogenase (quinone)
g271.t1	KAJ3571829.1hypothetical protein NP233_g3504	3	0	89.11	17	P:GO:0006606; P:GO:0006607; P:GO:0006610; P:GO:0015833; P:GO:0017038; P:GO:2000220; F:GO:0005215; F:GO:0008139; F:GO:0031267; F:GO:0061608; C:GO:0005634; C:GO:0005737; C:GO:0010494; C:GO:0031965; C:GO:0034399; C:GO:1990904	P:protein import into nucleus; P:NLS-bearing protein import into nucleus; P:ribosomal protein import into nucleus; P:peptide transport; P:protein import; P:regulation of pseudohyphal growth; F:transporter activity; F:nuclear localization sequence binding; F:small GTPase binding; F:nuclear import signal receptor activity; C:nucleus; C:cytoplasm; C:cytoplasmic stress granule; C:nuclear membrane; C:…
g272.t1	KAF5362126.1hypothetical protein D9756_002480	3	0	87.14	6	P:GO:0007120; C:GO:0000131; C:GO:0000144; C:GO:0000324; C:GO:0005886; C:GO:0099568	P:axial cellular bud site selection; C:incipient cellular bud site; C:cellular bud neck septin ring; C:fungal-type vacuole; C:plasma membrane; C:cytoplasmic region
g273.t1	KAF5361914.1hypothetical protein D9756_002479	3	2.51e-60	91.06	23	P:GO:0000743; P:GO:0007017; P:GO:0030437; P:GO:0030989; P:GO:0032781; P:GO:0040001; P:GO:0044703; P:GO:0048315; P:GO:0051292; P:GO:0051345; F:GO:0008092; F:GO:0045505; F:GO:0051959; C:GO:0005643; C:GO:0005737; C:GO:0005868; C:GO:0005874; C:GO:0005881; C:GO:0030286; C:GO:0034399; C:GO:0035974; C:GO:1990429	P:nuclear migration involved in conjugation with cellular fusion; P:microtubule-based process; P:ascospore formation; P:dynein-driven meiotic oscillatory nuclear movement; P:positive regulation of ATP-dependent activity; P:establishment of mitotic spindle localization; P:multi-organism reproductive process; P:conidium formation; P:nuclear pore complex assembly; P:positive regulation of hydrolase …
g274.t1	KAF5361969.1hypothetical protein D9756_002478	3	0	81.56	4	F:GO:0004674; F:GO:0005524	F:protein serine/threonine kinase activity; F:ATP binding	EC:2.7.11.1	non-specific serine/threonine protein kinase
g275.t1	XP_006461978.1hypothetical protein AGABI2DRAFT_206080	3	0	64.37	18	P:GO:0006259; P:GO:0006297; P:GO:0006303; P:GO:0006310; P:GO:0006974; P:GO:0044182; P:GO:0044419; P:GO:0048869; P:GO:0051103; F:GO:0003910; F:GO:0005524; F:GO:0016874; F:GO:0097159; C:GO:0000228; C:GO:0000785; C:GO:0005730; C:GO:0005737; C:GO:0032807	P:DNA metabolic process; P:nucleotide-excision repair, DNA gap filling; P:double-strand break repair via nonhomologous end joining; P:DNA recombination; P:DNA damage response; P:filamentous growth of a population of unicellular organisms; P:biological process involved in interspecies interaction between organisms; P:cellular developmental process; P:DNA ligation involved in DNA repair; F:DNA liga…	EC:6.5.1.1	DNA ligase (ATP)
g276.t1	KAF5361903.1hypothetical protein D9756_002475	3	0	96.41	10	P:GO:0000245; F:GO:0003729; F:GO:1901363; C:GO:0005681; C:GO:0005686; C:GO:0071004; C:GO:0071013; C:GO:0071014	P:spliceosomal complex assembly; F:mRNA binding; F:heterocyclic compound binding; C:spliceosomal complex; C:U2 snRNP; C:U2-type prespliceosome; C:catalytic step 2 spliceosome; C:post-mRNA release spliceosomal complex
g277.t1	KAJ3566924.1hypothetical protein NP233_g6696	3	0	86.41	14	P:GO:0006886; P:GO:0006896; P:GO:0015833; P:GO:0016197; P:GO:0016482; F:GO:0030276; C:GO:0005768; C:GO:0005829; C:GO:0030121	P:intracellular protein transport; P:Golgi to vacuole transport; P:peptide transport; P:endosomal transport; P:cytosolic transport; F:clathrin binding; C:endosome; C:cytosol; C:AP-1 adaptor complex
g278.t1	KXN86560.1Protein transport protein sec20	3	3.65e-120	87.32	12	P:GO:0006886; P:GO:0006890; P:GO:0015833; P:GO:0048279; P:GO:0061025; F:GO:0005484; F:GO:0005515; C:GO:0005789; C:GO:0016020; C:GO:0031201	P:intracellular protein transport; P:retrograde vesicle-mediated transport, Golgi to endoplasmic reticulum; P:peptide transport; P:vesicle fusion with endoplasmic reticulum; P:membrane fusion; F:SNAP receptor activity; F:protein binding; C:endoplasmic reticulum membrane; C:membrane; C:SNARE complex
g279.t1	KAF7770494.1hypothetical protein Agabi119p4_6468	3	6.27e-117	90.6	12	P:GO:0006878; P:GO:0035434; P:GO:0065008; P:GO:0098656; P:GO:1990547; F:GO:0005315; F:GO:0008509; F:GO:0015114; C:GO:0005743	P:intracellular copper ion homeostasis; P:copper ion transmembrane transport; P:regulation of biological quality; P:monoatomic anion transmembrane transport; P:mitochondrial phosphate ion transmembrane transport; F:phosphate transmembrane transporter activity; F:monoatomic anion transmembrane transporter activity; F:obsolete phosphate ion transmembrane transporter activity; C:mitochondrial inner …
g280.t1	KAJ3569034.1hypothetical protein NP233_g5309	3	5.6e-76	98.89	12	P:GO:0006878; P:GO:0035434; P:GO:0065008; P:GO:0098656; P:GO:1990547; F:GO:0005315; F:GO:0008509; F:GO:0015114; C:GO:0005743	P:intracellular copper ion homeostasis; P:copper ion transmembrane transport; P:regulation of biological quality; P:monoatomic anion transmembrane transport; P:mitochondrial phosphate ion transmembrane transport; F:phosphate transmembrane transporter activity; F:monoatomic anion transmembrane transporter activity; F:obsolete phosphate ion transmembrane transporter activity; C:mitochondrial inner …
g281.t1	KAF5351763.1hypothetical protein D9756_007611	3	7.7e-300	80.59	8	P:GO:0006886; P:GO:0015833; P:GO:0031338; P:GO:0090630; F:GO:0005096; F:GO:0031267; C:GO:0005739; C:GO:0005794	P:intracellular protein transport; P:peptide transport; P:regulation of vesicle fusion; P:activation of GTPase activity; F:GTPase activator activity; F:small GTPase binding; C:mitochondrion; C:Golgi apparatus
g282.t1	KAF5351766.1hypothetical protein D9756_007614	3	6.46e-36	87.79	10	P:GO:0070987; P:GO:0072429; F:GO:0003684; F:GO:0003887; C:GO:0000228; C:GO:0000785; C:GO:0005737	P:error-free translesion synthesis; P:response to intra-S DNA damage checkpoint signaling; F:damaged DNA binding; F:DNA-directed DNA polymerase activity; C:nuclear chromosome; C:chromatin; C:cytoplasm	EC:2.7.7.7	DNA-directed DNA polymerase
g283.t1	KAF5351767.1hypothetical protein D9756_007615	3	0	87.99	4	P:GO:0006508; F:GO:0004197	P:proteolysis; F:cysteine-type endopeptidase activity	EC:3.4.22	Acting on peptide bonds (peptidases)
g284.t1	KAF5351768.1hypothetical protein D9756_007616	3	2.38e-267	88.41	15	P:GO:0000045; P:GO:0006661; P:GO:0006914; P:GO:0006995; P:GO:0030242; P:GO:0032258; P:GO:0034727; P:GO:0042147; P:GO:0045324; C:GO:0000329; C:GO:0005768; C:GO:0005829; C:GO:0034045; C:GO:0034271; C:GO:0034272	P:autophagosome assembly; P:phosphatidylinositol biosynthetic process; P:autophagy; P:cellular response to nitrogen starvation; P:autophagy of peroxisome; P:cytoplasm to vacuole targeting by the Cvt pathway; P:piecemeal microautophagy of the nucleus; P:retrograde transport, endosome to Golgi; P:late endosome to vacuole transport; C:fungal-type vacuole membrane; C:endosome; C:cytosol; C:phagophore…
g285.t1	KAF5351769.1hypothetical protein D9756_007617	3	0	82.95	14	P:GO:0006750; P:GO:0006820; P:GO:0009410; P:GO:0034635; P:GO:0042542; P:GO:0046677; P:GO:0046938; P:GO:0098849; F:GO:0004357; F:GO:0005524; C:GO:0017109	P:glutathione biosynthetic process; P:monoatomic anion transport; P:response to xenobiotic stimulus; P:glutathione transport; P:response to hydrogen peroxide; P:response to antibiotic; P:phytochelatin biosynthetic process; P:cellular detoxification of cadmium ion; F:glutamate-cysteine ligase activity; F:ATP binding; C:glutamate-cysteine ligase complex	EC:6.3.2.2	glutamate--cysteine ligase
g286.t1	KAF5351760.1hypothetical protein D9756_007618	3	3.83e-85	90.53	13	P:GO:0006805; P:GO:0006811; P:GO:0009168; P:GO:0015985; P:GO:0015986; P:GO:0016310; P:GO:0042776; P:GO:0046907; P:GO:1990542; F:GO:0046933; C:GO:0005756; C:GO:0045261	P:xenobiotic metabolic process; P:monoatomic ion transport; P:purine ribonucleoside monophosphate biosynthetic process; P:energy coupled proton transport, down electrochemical gradient; P:proton motive force-driven ATP synthesis; P:phosphorylation; P:proton motive force-driven mitochondrial ATP synthesis; P:intracellular transport; P:mitochondrial transmembrane transport; F:proton-transporting AT…	EC:7.1.2.2; EC:6	H(+)-transporting two-sector ATPase; Ligases
g288.t1	KAF5351988.1hypothetical protein D9756_007620	3	5.55e-217	68.5
g289.t1	KAF5351990.1hypothetical protein D9756_007622	3	0	82.1	7	P:GO:0032220; P:GO:0044703; P:GO:0097036; C:GO:0000324; C:GO:0005886; C:GO:0016020; C:GO:0043332	P:plasma membrane fusion involved in cytogamy; P:multi-organism reproductive process; P:regulation of plasma membrane sterol distribution; C:fungal-type vacuole; C:plasma membrane; C:membrane; C:mating projection tip
g290.t1	KAF5351989.1hypothetical protein D9756_007623	3	0	87.92	17	P:GO:0007029; P:GO:0008645; P:GO:0016192; P:GO:0016320; P:GO:0044419; P:GO:0048309; P:GO:0071466; F:GO:0003924; F:GO:0005525; F:GO:0032550; C:GO:0005789; C:GO:0005933; C:GO:0032541; C:GO:0099568	P:endoplasmic reticulum organization; P:hexose transmembrane transport; P:vesicle-mediated transport; P:endoplasmic reticulum membrane fusion; P:biological process involved in interspecies interaction between organisms; P:endoplasmic reticulum inheritance; P:cellular response to xenobiotic stimulus; F:GTPase activity; F:GTP binding; F:purine ribonucleoside binding; C:endoplasmic reticulum membran…	EC:3.6.1.15	nucleoside-triphosphate phosphatase
g291.t1	KAF5352657.1hypothetical protein D9756_005972	3	2.06e-291	78.27
g292.t1	KAF5352658.1hypothetical protein D9756_005971	2	3.99e-129	72.9
g293.t1	KAF5352659.1hypothetical protein D9756_005970	3	0	93.34	10	P:GO:0006546; P:GO:0006730; P:GO:0019464; P:GO:0042178; P:GO:0065008; F:GO:0004375; C:GO:0005739; C:GO:0005960	P:glycine catabolic process; P:one-carbon metabolic process; P:glycine decarboxylation via glycine cleavage system; P:xenobiotic catabolic process; P:regulation of biological quality; F:glycine dehydrogenase (decarboxylating) activity; C:mitochondrion; C:glycine cleavage complex	EC:1.4.4.2	glycine dehydrogenase (aminomethyl-transferring)
g294.t1	KAF5352372.1hypothetical protein D9756_005967	3	1.16e-154	81.14	4	P:GO:0006364; C:GO:0005730; C:GO:0030687; C:GO:0030688	P:rRNA processing; C:nucleolus; C:preribosome, large subunit precursor; C:preribosome, small subunit precursor
g295.t1	KAF5352370.1hypothetical protein D9756_005965	3	5.91e-118	94.76	7	P:GO:0044237; P:GO:0045116; F:GO:0005524; F:GO:0016740; F:GO:0061654; C:GO:0005737	P:cellular metabolic process; P:protein neddylation; F:ATP binding; F:transferase activity; F:NEDD8 conjugating enzyme activity; C:cytoplasm	EC:2.3.2.34	E2 NEDD8-conjugating enzyme
g296.t1	KAF5352374.1hypothetical protein D9756_005961	3	0	82.16	6	P:GO:0006338; P:GO:0051276; C:GO:0000228; C:GO:0000785; C:GO:0005739; C:GO:0031932	P:chromatin remodeling; P:chromosome organization; C:nuclear chromosome; C:chromatin; C:mitochondrion; C:TORC2 complex
g297.t1	KAJ3560477.1hypothetical protein NP233_g10816	3	2.24e-181	87.09	4	P:GO:0015074; F:GO:0003676; F:GO:0003723; C:GO:0005634	P:DNA integration; F:nucleic acid binding; F:RNA binding; C:nucleus
g298.t1	KAF7776763.1hypothetical protein Agabi119p4_5156	3	2.77e-70	88.41	3	P:GO:0015074; F:GO:0003723; C:GO:0005634	P:DNA integration; F:RNA binding; C:nucleus
g301.t1	KAJ3558637.1hypothetical protein NP233_g11467	3	1.18e-121	46.38	5	P:GO:0015074; F:GO:0003676; F:GO:0003723; F:GO:0008270; C:GO:0005634	P:DNA integration; F:nucleic acid binding; F:RNA binding; F:zinc ion binding; C:nucleus
g302.t1	KAF5360428.1hypothetical protein D9756_004560	1	7.36e-05	71.74	3	F:GO:0003676; F:GO:0008270; C:GO:0005634	F:nucleic acid binding; F:zinc ion binding; C:nucleus
g304.t1	KAF5360428.1hypothetical protein D9756_004560	3	4.69e-08	69.87	1	F:GO:0005488	F:binding
g307.t1	KAF5359632.1hypothetical protein D9756_003124	3	4.77e-45	89.96	5	P:GO:0000724; P:GO:0006406; P:GO:0043248; C:GO:0005634; C:GO:0008541	P:double-strand break repair via homologous recombination; P:mRNA export from nucleus; P:proteasome assembly; C:nucleus; C:proteasome regulatory particle, lid subcomplex
g308.t1	KAJ8502929.1hypothetical protein ONZ45_g11307	3	2.36e-242	82.19	3	P:GO:0055085; F:GO:0022857; C:GO:0016020	P:transmembrane transport; F:transmembrane transporter activity; C:membrane
g309.t1	KAF5359190.1hypothetical protein D9756_003119	3	0	80.31	4	P:GO:0006099; F:GO:0046912	P:tricarboxylic acid cycle; F:acyltransferase activity, acyl groups converted into alkyl on transfer	EC:2.3.3	Acyltransferases
g310.t1	XP_007331441.1hypothetical protein AGABI1DRAFT_114934	3	4.56e-237	92.77	5	P:GO:0090304; F:GO:0003677; F:GO:0004518; F:GO:1901363; C:GO:0005634	P:nucleic acid metabolic process; F:DNA binding; F:nuclease activity; F:heterocyclic compound binding; C:nucleus	EC:3.1	Acting on ester bonds
g311.t1	KAF5359197.1hypothetical protein D9756_003116	3	2.08e-123	71.32	3	P:GO:0032259; F:GO:0008168; F:GO:0008757	P:methylation; F:methyltransferase activity; F:S-adenosylmethionine-dependent methyltransferase activity
g312.t1	KAF5359196.1hypothetical protein D9756_003117	3	1.38e-76	79.46	1	C:GO:0005739	C:mitochondrion
g313.t1	KAF5359198.1hypothetical protein D9756_003115	3	0	58.34	4	P:GO:0006369; P:GO:0006378; F:GO:0000993; F:GO:0003729	P:termination of RNA polymerase II transcription; P:obsolete mRNA polyadenylation; F:RNA polymerase II complex binding; F:mRNA binding
g314.t1	KAF5359199.1hypothetical protein D9756_003114	3	0	69.26	8	P:GO:0006366; P:GO:1901255; F:GO:0000014; F:GO:0003697; F:GO:0016787; F:GO:1901363; C:GO:0000112; C:GO:1990391	P:transcription by RNA polymerase II; P:nucleotide-excision repair involved in interstrand cross-link repair; F:single-stranded DNA endodeoxyribonuclease activity; F:single-stranded DNA binding; F:hydrolase activity; F:heterocyclic compound binding; C:nucleotide-excision repair factor 3 complex; C:DNA repair complex	EC:3.1	Acting on ester bonds
g315.t1	KAJ3570494.1hypothetical protein NP233_g4373	3	2e-101	81.05	2	P:GO:0045292; F:GO:0030544	P:mRNA cis splicing, via spliceosome; F:Hsp70 protein binding
g316.t1	KIL54790.1hypothetical protein M378DRAFT_37778, partial	2	9.22e-08	62.71
g318.t1	KAJ3563210.1hypothetical protein NP233_g9088	3	0	75.53	1	C:GO:0016020	C:membrane
g319.t1	KAF5356122.1hypothetical protein D9756_004058	3	3.64e-208	80.19	4	F:GO:0000166; F:GO:0003676; F:GO:0005524; C:GO:0016020	F:nucleotide binding; F:nucleic acid binding; F:ATP binding; C:membrane
g320.t1	KAF5356121.1hypothetical protein D9756_004059	3	0	89.17	3	P:GO:0055085; F:GO:0022857; C:GO:0016020	P:transmembrane transport; F:transmembrane transporter activity; C:membrane
g321.t1	KAF5355783.1hypothetical protein D9756_004061	3	1.49e-207	68.98
g322.t1	KAF5355780.1hypothetical protein D9756_004062	3	0	88.64	11	P:GO:0000209; P:GO:0000413; P:GO:0006457; P:GO:0016567; F:GO:0003755; F:GO:0004842; F:GO:0034450; C:GO:0005634	P:protein polyubiquitination; P:protein peptidyl-prolyl isomerization; P:protein folding; P:protein ubiquitination; F:peptidyl-prolyl cis-trans isomerase activity; F:ubiquitin-protein transferase activity; F:ubiquitin-ubiquitin ligase activity; C:nucleus	EC:5.2.1.8; EC:2.3.2	peptidylprolyl isomerase; Acyltransferases
g323.t1	KAF5355781.1hypothetical protein D9756_004063	3	2.3e-59	62.56	11	P:GO:0006820; P:GO:0009410; P:GO:0015833; P:GO:0043328; P:GO:0044248; P:GO:0046618; P:GO:0070676; P:GO:1904669; F:GO:0005515; C:GO:0000815; C:GO:0005829	P:monoatomic anion transport; P:response to xenobiotic stimulus; P:peptide transport; P:protein transport to vacuole involved in ubiquitin-dependent protein catabolic process via the multivesicular body sorting pathway; P:cellular catabolic process; P:xenobiotic export from cell; P:intralumenal vesicle formation; P:ATP export; F:protein binding; C:ESCRT III complex; C:cytosol
g324.t1	KAF9455036.1gamma-glutamyltranspeptidase	3	0	90.96	4	F:GO:0036374; F:GO:0103068	F:glutathione hydrolase activity; F:leukotriene C4 gamma-glutamyl transferase activity	EC:2.3.2.2; EC:3.4.19.13	gamma-glutamyltransferase; glutathione gamma-glutamate hydrolase
g325.t1	KAF5355785.1hypothetical protein D9756_004291	3	1.35e-22	55.48	1	F:GO:0003824	F:catalytic activity
g326.t1	KAF5355859.1hypothetical protein D9756_003789	3	4.32e-163	68.43
g327.t1	KAF9453789.1hypothetical protein P691DRAFT_755154	3	2.81e-49	76.84
g328.t1	KXN89997.1UPF0160 protein C27H6.8	3	2.09e-203	89.7	3	F:GO:0016787; C:GO:0005634; C:GO:0005739	F:hydrolase activity; C:nucleus; C:mitochondrion	EC:3	Hydrolases
g329.t1	KAJ3576674.1hypothetical protein NP233_g285	3	5.49e-86	79.11	3	P:GO:0055085; F:GO:0022857; C:GO:0016020	P:transmembrane transport; F:transmembrane transporter activity; C:membrane
g330.t1	KAF5355850.1hypothetical protein D9756_003786	3	1.05e-137	97.12	9	P:GO:0002181; P:GO:0006412; F:GO:0003723; F:GO:0003735; F:GO:1901363; C:GO:0005840; C:GO:0022625; C:GO:1990904	P:cytoplasmic translation; P:translation; F:RNA binding; F:structural constituent of ribosome; F:heterocyclic compound binding; C:ribosome; C:cytosolic large ribosomal subunit; C:ribonucleoprotein complex
g331.t1	KAJ3576661.1hypothetical protein NP233_g283	3	1.47e-195	84.82	1	F:GO:0016787	F:hydrolase activity	EC:3	Hydrolases
g332.t1	KAF5355854.1hypothetical protein D9756_003782	3	0	70.03	2	P:GO:0007264; F:GO:0005085	P:small GTPase-mediated signal transduction; F:guanyl-nucleotide exchange factor activity
g333.t1	KAF5355857.1hypothetical protein D9756_003781	3	0	84.02	15	P:GO:0000027; P:GO:0006364; P:GO:0010501; P:GO:0071466; F:GO:0003676; F:GO:0003723; F:GO:0003724; F:GO:0005524; F:GO:0016787; F:GO:0016887; C:GO:0005730; C:GO:0005737; C:GO:0030687	P:ribosomal large subunit assembly; P:rRNA processing; P:RNA secondary structure unwinding; P:cellular response to xenobiotic stimulus; F:nucleic acid binding; F:RNA binding; F:RNA helicase activity; F:ATP binding; F:hydrolase activity; F:ATP hydrolysis activity; C:nucleolus; C:cytoplasm; C:preribosome, large subunit precursor	EC:3.6.4.13; EC:3.6.1.15	RNA helicase; nucleoside-triphosphate phosphatase
g334.t1	KAF5355856.1hypothetical protein D9756_003780	3	6e-175	84.97	1	P:GO:0009987	P:cellular process
g335.t1	KAF5356031.1hypothetical protein D9756_003777	3	1.44e-37	87.66
g336.t1	KAF9453804.1actin-related protein	3	6.23e-183	87.6	7	P:GO:0000132; P:GO:0030989; P:GO:0031578; P:GO:0045841; F:GO:0005200; C:GO:0005869; C:GO:0051285	P:establishment of mitotic spindle orientation; P:dynein-driven meiotic oscillatory nuclear movement; P:mitotic spindle orientation checkpoint signaling; P:negative regulation of mitotic metaphase/anaphase transition; F:structural constituent of cytoskeleton; C:dynactin complex; C:cell cortex of cell tip
g338.t1	KAF5347741.1hypothetical protein D9756_010241	3	5.92e-128	77.38	14	P:GO:0006810; P:GO:0006886; P:GO:0006888; P:GO:0015833; P:GO:0051641; C:GO:0000139; C:GO:0005783; C:GO:0005789; C:GO:0005793; C:GO:0005794; C:GO:0005798; C:GO:0030134; C:GO:0031090; C:GO:0098791	P:transport; P:intracellular protein transport; P:endoplasmic reticulum to Golgi vesicle-mediated transport; P:peptide transport; P:cellular localization; C:Golgi membrane; C:endoplasmic reticulum; C:endoplasmic reticulum membrane; C:endoplasmic reticulum-Golgi intermediate compartment; C:Golgi apparatus; C:Golgi-associated vesicle; C:COPII-coated ER to Golgi transport vesicle; C:organelle membra…
g339.t1	KAF5358047.1hypothetical protein D9756_001788	3	1.82e-182	78.7	6	F:GO:0000166; F:GO:0016301; C:GO:0005739	F:nucleotide binding; F:kinase activity; C:mitochondrion	EC:2.7	Transferring phosphorus-containing groups
g340.t1	KAF5357893.1hypothetical protein D9756_001787	3	0	80.82	6	P:GO:0016310; F:GO:0004712; F:GO:0005524	P:phosphorylation; F:protein serine/threonine/tyrosine kinase activity; F:ATP binding	EC:2.7.12.1	dual-specificity kinase
g341.t1	KAF5357895.1hypothetical protein D9756_001783	3	5.94e-202	82.36	10	P:GO:0007020; P:GO:0009987; P:GO:0051315; P:GO:0051455; F:GO:0005200; C:GO:0000776; C:GO:0000794; C:GO:0005876; C:GO:0031262; C:GO:0035974	P:microtubule nucleation; P:cellular process; P:attachment of mitotic spindle microtubules to kinetochore; P:spindle attachment to meiosis I kinetochore; F:structural constituent of cytoskeleton; C:kinetochore; C:condensed nuclear chromosome; C:spindle microtubule; C:Ndc80 complex; C:meiotic spindle pole body
g342.t1	KAF5357894.1hypothetical protein D9756_001782	3	0	68.03	36	P:GO:0000019; P:GO:0000070; P:GO:0000706; P:GO:0000722; P:GO:0000724; P:GO:0006265; P:GO:0006268; P:GO:0006301; P:GO:0007534; P:GO:0009987; P:GO:0010556; P:GO:0010947; P:GO:0031573; P:GO:0031860; P:GO:0043007; P:GO:0045128; P:GO:0045132; P:GO:0045165; P:GO:0060249; P:GO:0065008; P:GO:0070914; P:GO:0071140; P:GO:0110029; P:GO:1903221; P:GO:1903463; F:GO:0003677; F:GO:0003824; F:GO:0005524; F:GO:00…	P:regulation of mitotic recombination; P:mitotic sister chromatid segregation; P:meiotic DNA double-strand break processing; P:telomere maintenance via recombination; P:double-strand break repair via homologous recombination; P:DNA topological change; P:DNA unwinding involved in DNA replication; P:postreplication repair; P:gene conversion at mating-type locus; P:cellular process; P:regulation of …	EC:5.6.2.4; EC:3.6.1.15	DNA 3'-5' helicase; nucleoside-triphosphate phosphatase
g343.t1	KAF5358049.1hypothetical protein D9756_001780	3	0	93.06	8	F:GO:0003676; F:GO:0003724; F:GO:0005524; F:GO:0016787	F:nucleic acid binding; F:RNA helicase activity; F:ATP binding; F:hydrolase activity	EC:3.6.4.13	RNA helicase
g344.t1	KAF5358561.1hypothetical protein D9756_001777	3	1.49e-110	87.83	2	F:GO:0016787	F:hydrolase activity	EC:3	Hydrolases
g345.t1	KAF5358544.1hypothetical protein D9756_001776	3	0	86.99	13	P:GO:0000055; P:GO:0006405; P:GO:0006611; P:GO:0007089; P:GO:0015031; P:GO:0015833; P:GO:0030036; P:GO:0042273; P:GO:0071166; C:GO:0005730	P:ribosomal large subunit export from nucleus; P:RNA export from nucleus; P:protein export from nucleus; P:traversing start control point of mitotic cell cycle; P:protein transport; P:peptide transport; P:actin cytoskeleton organization; P:ribosomal large subunit biogenesis; P:ribonucleoprotein complex localization; C:nucleolus
g346.t1	KAF5358559.1hypothetical protein D9756_001775	3	5.14e-103	70.65
g347.t1	KXN90448.1hypothetical protein AN958_04120	3	3.02e-54	72.69
g348.t1	KAJ3561033.1hypothetical protein NP233_g10445	3	4.08e-30	62.89	1	F:GO:0003824	F:catalytic activity
g350.t1	KAJ3572589.1hypothetical protein NP233_g2983	3	0	82.9	10	P:GO:0006614; P:GO:0015031; P:GO:0015833; P:GO:0031204; P:GO:0046967; F:GO:0005215; C:GO:0005739; C:GO:0005783; C:GO:0016020; C:GO:0031207	P:SRP-dependent cotranslational protein targeting to membrane; P:protein transport; P:peptide transport; P:post-translational protein targeting to membrane, translocation; P:cytosol to endoplasmic reticulum transport; F:transporter activity; C:mitochondrion; C:endoplasmic reticulum; C:membrane; C:Sec62/Sec63 complex
g351.t1	KAF5360975.1hypothetical protein D9756_004486	3	4.12e-49	60.28	3	F:GO:0003676; F:GO:0008270; C:GO:0005634	F:nucleic acid binding; F:zinc ion binding; C:nucleus
g352.t1	XP_007329920.1hypothetical protein AGABI1DRAFT_113773	3	1.32e-214	72.47	2	F:GO:0003723; C:GO:0005737	F:RNA binding; C:cytoplasm
g353.t1	KAF5360843.1hypothetical protein D9756_004964	3	0	80.16	7	P:GO:0008053; P:GO:0051641; P:GO:0051646; P:GO:0061025; F:GO:0003924; F:GO:0042803; C:GO:0005741	P:mitochondrial fusion; P:cellular localization; P:mitochondrion localization; P:membrane fusion; F:GTPase activity; F:protein homodimerization activity; C:mitochondrial outer membrane	EC:3.6.1.15	nucleoside-triphosphate phosphatase
g354.t1	KAF5360840.1hypothetical protein D9756_004967	3	6.11e-90	92.78	1	F:GO:0016491	F:oxidoreductase activity	EC:1	Oxidoreductases
g355.t1	KAF5360835.1hypothetical protein D9756_004968	3	0	96.41	5	P:GO:0019551; F:GO:0004352; C:GO:0005739	P:glutamate catabolic process to 2-oxoglutarate; F:glutamate dehydrogenase (NAD+) activity; C:mitochondrion	EC:1.4.1.3; EC:1.4.1.2	glutamate dehydrogenase [NAD(P)(+)]; glutamate dehydrogenase
g356.t1	KAJ3575867.1hypothetical protein NP233_g808	3	1.9e-228	96.77	9	P:GO:0019430; F:GO:0004791; F:GO:0016651; F:GO:0140907; C:GO:0005737; C:GO:0005739	P:removal of superoxide radicals; F:thioredoxin-disulfide reductase (NADPH) activity; F:oxidoreductase activity, acting on NAD(P)H; F:flavin-dependent halogenase activity; C:cytoplasm; C:mitochondrion	EC:1.6; EC:1.14; EC:1.8.1.9; EC:1.8.1.8	Acting on NADH or NADPH; Acting on paired donors, with incorporation or reduction of molecular oxygen. The oxygen incorporated need not be derived from O2; thioredoxin-disulfide reductase; protein-disulfide reductase
g357.t1	KAF5360419.1hypothetical protein D9756_004973	3	3.07e-65	76.99	1	C:GO:0016020	C:membrane
g358.t1	THV00939.1V-type ATPase	3	4.5e-81	95.42	8	P:GO:1902600; F:GO:0046961; C:GO:0005774; C:GO:0033179	P:proton transmembrane transport; F:proton-transporting ATPase activity, rotational mechanism; C:vacuolar membrane; C:proton-transporting V-type ATPase, V0 domain	EC:7.2.2	Catalysing the translocation of inorganic cations
g359.t1	KAF5360420.1hypothetical protein D9756_004974	3	1.44e-200	72.4	1	F:GO:0003824	F:catalytic activity
g360.t1	KAF5360748.1hypothetical protein D9756_004977	3	2.85e-200	77.32	1	C:GO:0016020	C:membrane
g361.t1	KAJ3569620.1hypothetical protein NP233_g4929	3	8.45e-150	76.27	2	F:GO:0003824	F:catalytic activity
g362.t1	KXN90144.1hypothetical protein AN958_04634	3	1.01e-105	72.13	4	P:GO:0006301; F:GO:0003697; F:GO:0046872; F:GO:0061630	P:postreplication repair; F:single-stranded DNA binding; F:metal ion binding; F:ubiquitin protein ligase activity
g363.t1	KAF5351919.1hypothetical protein D9756_007458	3	0	88.8	15	P:GO:0000122; P:GO:0000411; P:GO:0006325; P:GO:0006357; P:GO:0006476; P:GO:0010628; P:GO:0010629; P:GO:0022408; P:GO:0045944; P:GO:0051276; F:GO:0003712; F:GO:0003713; C:GO:0016592; C:GO:0034967	P:negative regulation of transcription by RNA polymerase II; P:positive regulation of transcription by galactose; P:chromatin organization; P:regulation of transcription by RNA polymerase II; P:protein deacetylation; P:positive regulation of gene expression; P:negative regulation of gene expression; P:negative regulation of cell-cell adhesion; P:positive regulation of transcription by RNA polymer…
g364.t1	KAF5351925.1hypothetical protein D9756_007456	3	0	76.97	3	P:GO:0098655; F:GO:0005227; C:GO:0016020	P:monoatomic cation transmembrane transport; F:calcium-activated cation channel activity; C:membrane
g365.t1	KAF5351928.1hypothetical protein D9756_007455	3	6.48e-307	84.08	7	P:GO:0031146; P:GO:0044248; P:GO:0070647; F:GO:0005515; F:GO:0030674; C:GO:0005622; C:GO:0019005	P:SCF-dependent proteasomal ubiquitin-dependent protein catabolic process; P:cellular catabolic process; P:protein modification by small protein conjugation or removal; F:protein binding; F:protein-macromolecule adaptor activity; C:intracellular anatomical structure; C:SCF ubiquitin ligase complex
g366.t1	KAF5351927.1hypothetical protein D9756_007454	3	0	82.43	11	P:GO:0006409; P:GO:0006611; P:GO:0015833; P:GO:0031503; P:GO:0071166; F:GO:0000049; F:GO:0004672; F:GO:0005524; C:GO:0005737	P:tRNA export from nucleus; P:protein export from nucleus; P:peptide transport; P:protein-containing complex localization; P:ribonucleoprotein complex localization; F:tRNA binding; F:protein kinase activity; F:ATP binding; C:cytoplasm	EC:2.7.1	Transferring phosphorus-containing groups
g367.t1	KAF5351922.1hypothetical protein D9756_007453	3	5.19e-68	91.68	13	P:GO:0000122; P:GO:0006357; P:GO:0010628; P:GO:0010629; P:GO:0045944; F:GO:0001093; F:GO:0003712; F:GO:0061629; C:GO:0016591; C:GO:0016592; C:GO:0070847	P:negative regulation of transcription by RNA polymerase II; P:regulation of transcription by RNA polymerase II; P:positive regulation of gene expression; P:negative regulation of gene expression; P:positive regulation of transcription by RNA polymerase II; F:TFIIB-class transcription factor binding; F:transcription coregulator activity; F:RNA polymerase II-specific DNA-binding transcription fact…
g368.t1	KAJ3571005.1hypothetical protein NP233_g4045	3	0	77.88	10	P:GO:0000122; P:GO:0010628; P:GO:0010629; P:GO:0045944; F:GO:0001093; F:GO:0061629; C:GO:0005634; C:GO:0016591; C:GO:0016592; C:GO:0070847	P:negative regulation of transcription by RNA polymerase II; P:positive regulation of gene expression; P:negative regulation of gene expression; P:positive regulation of transcription by RNA polymerase II; F:TFIIB-class transcription factor binding; F:RNA polymerase II-specific DNA-binding transcription factor binding; C:nucleus; C:RNA polymerase II, holoenzyme; C:mediator complex; C:core mediato…
g369.t1	KAF5351924.1hypothetical protein D9756_007451	3	5.49e-69	71.73	2	F:GO:0016746	F:acyltransferase activity	EC:2.3	Acyltransferases
g370.t1	KAF5351923.1hypothetical protein D9756_007450	3	0	97.04	11	P:GO:0006083; P:GO:0006094; P:GO:0006805; P:GO:0015976; P:GO:0016999; F:GO:0004612; F:GO:0005524; C:GO:0005829	P:acetate metabolic process; P:gluconeogenesis; P:xenobiotic metabolic process; P:carbon utilization; P:antibiotic metabolic process; F:phosphoenolpyruvate carboxykinase (ATP) activity; F:ATP binding; C:cytosol	EC:4.1.1.49; EC:4.1.1.32	phosphoenolpyruvate carboxykinase (ATP); phosphoenolpyruvate carboxykinase (GTP)
g371.t1	KAJ3576108.1hypothetical protein NP233_g672	3	7.1e-43	60.45
g372.t1	KAF5359561.1hypothetical protein D9756_003528	3	2.35e-124	83.18	8	P:GO:0006488; P:GO:0097502; F:GO:0016757; F:GO:0052917; C:GO:0005783; C:GO:0016020	P:dolichol-linked oligosaccharide biosynthetic process; P:mannosylation; F:glycosyltransferase activity; F:dolichyl-P-Man:Man(7)GlcNAc(2)-PP-dolichol alpha-1,6-mannosyltransferase; C:endoplasmic reticulum; C:membrane	EC:2.4.1.260	dolichyl-P-Man:Man7GlcNAc2-PP-dolichol alpha-1,6-mannosyltransferase
g373.t1	KAF5359246.1hypothetical protein D9756_003527	3	0	80.46	9	P:GO:0055085; F:GO:0000166; F:GO:0016887; F:GO:0042626; F:GO:0140657; C:GO:0000329; C:GO:0005783; C:GO:0005886	P:transmembrane transport; F:nucleotide binding; F:ATP hydrolysis activity; F:ATPase-coupled transmembrane transporter activity; F:ATP-dependent activity; C:fungal-type vacuole membrane; C:endoplasmic reticulum; C:plasma membrane	EC:7.2.2; EC:3.6.1.15	Catalysing the translocation of inorganic cations; nucleoside-triphosphate phosphatase
g374.t1	KAF5359244.1hypothetical protein D9756_003526	3	3.53e-134	62.59	1	F:GO:0046983	F:protein dimerization activity
g375.t1	KAJ3566090.1hypothetical protein NP233_g7219	3	5.49e-115	79.51	10	P:GO:0000462; P:GO:0002183; F:GO:0003723; F:GO:0003743; F:GO:1901363; C:GO:0005852; C:GO:0010494; C:GO:0070993	P:maturation of SSU-rRNA from tricistronic rRNA transcript (SSU-rRNA, 5.8S rRNA, LSU-rRNA); P:cytoplasmic translational initiation; F:RNA binding; F:translation initiation factor activity; F:heterocyclic compound binding; C:eukaryotic translation initiation factor 3 complex; C:cytoplasmic stress granule; C:translation preinitiation complex
g376.t1	KAF5359405.1hypothetical protein D9756_003393	3	1.5e-217	84.39	18	P:GO:0006457; P:GO:0009408; P:GO:0034620; P:GO:0034975; P:GO:0036503; P:GO:0043161; P:GO:0044248; F:GO:0005524; F:GO:0030544; F:GO:0046872; F:GO:0051082; C:GO:0005788; C:GO:0005829	P:protein folding; P:response to heat; P:cellular response to unfolded protein; P:protein folding in endoplasmic reticulum; P:ERAD pathway; P:proteasome-mediated ubiquitin-dependent protein catabolic process; P:cellular catabolic process; F:ATP binding; F:Hsp70 protein binding; F:metal ion binding; F:unfolded protein binding; C:endoplasmic reticulum lumen; C:cytosol
g377.t1	KAF5359406.1hypothetical protein D9756_003392	3	8.55e-98	70.03
g378.t1	KXN89113.1GTPase-activating protein	3	0	97.19	18	P:GO:0032005; P:GO:0032989; P:GO:0043547; P:GO:0044703; P:GO:0046580; P:GO:0048522; P:GO:0048869; P:GO:0051128; P:GO:1905708; P:GO:2000243; F:GO:0005096; C:GO:0000935; C:GO:0005634; C:GO:0005829; C:GO:0005937; C:GO:0051285; C:GO:0090726; C:GO:0110165	P:signal transduction involved in positive regulation of conjugation with cellular fusion; P:cellular anatomical entity morphogenesis; P:positive regulation of GTPase activity; P:multi-organism reproductive process; P:negative regulation of Ras protein signal transduction; P:positive regulation of cellular process; P:cellular developmental process; P:regulation of cellular component organization;…
g379.t1	KAF5359326.1hypothetical protein D9756_003389	3	0	71.28	18	P:GO:0001403; P:GO:0006805; P:GO:0016192; P:GO:0016485; P:GO:0030154; P:GO:0030435; P:GO:0036177; P:GO:0036244; P:GO:0042306; P:GO:0044409; P:GO:0071285; P:GO:0090087; P:GO:1900198; P:GO:1900430; P:GO:1904589; C:GO:0000815; C:GO:0005634; C:GO:0005886	P:invasive growth in response to glucose limitation; P:xenobiotic metabolic process; P:vesicle-mediated transport; P:protein processing; P:cell differentiation; P:sporulation resulting in formation of a cellular spore; P:filamentous growth of a population of unicellular organisms in response to pH; P:cellular response to neutral pH; P:regulation of protein import into nucleus; P:symbiont entry in…
g380.t1	KAF5359401.1hypothetical protein D9756_003397	3	0	91.95	18	P:GO:0006611; P:GO:0015833; P:GO:0031503; P:GO:0071166; P:GO:0071528; F:GO:0000049; F:GO:0005525; F:GO:0031267; F:GO:0032550; C:GO:0005634; C:GO:0005643; C:GO:0005737; C:GO:0005739; C:GO:0016020; C:GO:0016363	P:protein export from nucleus; P:peptide transport; P:protein-containing complex localization; P:ribonucleoprotein complex localization; P:tRNA re-export from nucleus; F:tRNA binding; F:GTP binding; F:small GTPase binding; F:purine ribonucleoside binding; C:nucleus; C:nuclear pore; C:cytoplasm; C:mitochondrion; C:membrane; C:nuclear matrix
g381.t1	KAF5359398.1hypothetical protein D9756_003398	3	0	74.52
g382.t1	KAF5350591.1hypothetical protein D9756_008678	3	4.25E-315	83.44	1	F:GO:0016787	F:hydrolase activity	EC:3	Hydrolases
g384.t1	KAJ3563842.1hypothetical protein NP233_g8671	3	1.22e-299	84.04	2	F:GO:0008233	F:peptidase activity	EC:3.4	Acting on peptide bonds (peptidases)
g385.t1	KAF8739230.1hypothetical protein AX14_010394	3	0	73.62	8	F:GO:0004022; F:GO:0046872; F:GO:0047988; C:GO:0005739	F:alcohol dehydrogenase (NAD+) activity; F:metal ion binding; F:hydroxyacid-oxoacid transhydrogenase activity; C:mitochondrion	EC:1.1.99.24; EC:1.1.1.1; EC:1.1.1.71	hydroxyacid-oxoacid transhydrogenase; alcohol dehydrogenase; alcohol dehydrogenase [NAD(P)(+)]
g386.t1	KAJ3563278.1hypothetical protein NP233_g9040	3	1.9e-297	84.41	19	P:GO:0007088; P:GO:0007096; P:GO:0007265; P:GO:0031028; P:GO:0031098; P:GO:0031991; P:GO:0032147; P:GO:0042981; P:GO:0045931; P:GO:0110020; P:GO:1901893; P:GO:1902542; P:GO:1903438; F:GO:0004672; F:GO:0004674; F:GO:0005524; C:GO:0005737; C:GO:0044732	P:regulation of mitotic nuclear division; P:regulation of exit from mitosis; P:Ras protein signal transduction; P:septation initiation signaling; P:stress-activated protein kinase signaling cascade; P:regulation of actomyosin contractile ring contraction; P:activation of protein kinase activity; P:regulation of apoptotic process; P:positive regulation of mitotic cell cycle; P:regulation of actomy…	EC:2.7.11.1	non-specific serine/threonine protein kinase
g387.t1	KAF5363700.1hypothetical protein D9756_000623	3	4.59e-308	81.84	15	P:GO:0001111; P:GO:0001174; P:GO:0006357; P:GO:0006368; P:GO:0010467; P:GO:0043085; P:GO:0044238; P:GO:0044271; P:GO:0051123; P:GO:0080163; F:GO:0003676; F:GO:0072542; F:GO:0140110; C:GO:0005674	P:RNA polymerase II promoter clearance; P:transcriptional start site selection at RNA polymerase II promoter; P:regulation of transcription by RNA polymerase II; P:transcription elongation by RNA polymerase II; P:gene expression; P:positive regulation of catalytic activity; P:primary metabolic process; P:cellular nitrogen compound biosynthetic process; P:RNA polymerase II preinitiation complex as…
g388.t1	KAF5363699.1hypothetical protein D9756_000622	3	1.69e-158	67.49	7	P:GO:0010628; P:GO:0031141; P:GO:0045944; P:GO:2000243; F:GO:0000978; F:GO:0000981; F:GO:1901363	P:positive regulation of gene expression; P:induction of conjugation upon carbon starvation; P:positive regulation of transcription by RNA polymerase II; P:positive regulation of reproductive process; F:RNA polymerase II cis-regulatory region sequence-specific DNA binding; F:DNA-binding transcription factor activity, RNA polymerase II-specific; F:heterocyclic compound binding
g389.t1	KAJ3559209.1hypothetical protein NP233_g11323	3	7.9e-227	66.69	22	P:GO:0000070; P:GO:0000723; P:GO:0000724; P:GO:0007064; P:GO:0009059; P:GO:0010526; P:GO:0045910; P:GO:0060249; P:GO:0065008; P:GO:0070914; P:GO:0090618; P:GO:1902969; F:GO:0003677; F:GO:0003682; F:GO:0016887; F:GO:0061860; F:GO:1901363; C:GO:0000785; C:GO:0005739; C:GO:0031391; C:GO:0043599; C:GO:1904949	P:mitotic sister chromatid segregation; P:telomere maintenance; P:double-strand break repair via homologous recombination; P:mitotic sister chromatid cohesion; P:macromolecule biosynthetic process; P:retrotransposon silencing; P:negative regulation of DNA recombination; P:anatomical structure homeostasis; P:regulation of biological quality; P:UV-damage excision repair; P:DNA clamp unloading; P:mi…	EC:3.6.1.15	nucleoside-triphosphate phosphatase
g390.t1	KAF9451730.1Clavaminate synthase-like protein	3	1.02e-54	87.22
g391.t1	KAF5364327.1hypothetical protein D9756_000619	3	1.88e-181	69.61	9	P:GO:0007088; P:GO:0008298; P:GO:0016071; P:GO:0051321; F:GO:0003729; F:GO:1901363; C:GO:0005783; C:GO:0042175; C:GO:1990904	P:regulation of mitotic nuclear division; P:intracellular mRNA localization; P:mRNA metabolic process; P:meiotic cell cycle; F:mRNA binding; F:heterocyclic compound binding; C:endoplasmic reticulum; C:nuclear outer membrane-endoplasmic reticulum membrane network; C:ribonucleoprotein complex
g392.t1	KAF5364328.1hypothetical protein D9756_000618	3	0	74.21	13	P:GO:0000122; P:GO:0006355; P:GO:0010628; P:GO:0010629; P:GO:0045944; F:GO:0000978; F:GO:0001228; F:GO:0003677; F:GO:0003700; F:GO:1901363; C:GO:0000228; C:GO:0000785; C:GO:0005737	P:negative regulation of transcription by RNA polymerase II; P:regulation of DNA-templated transcription; P:positive regulation of gene expression; P:negative regulation of gene expression; P:positive regulation of transcription by RNA polymerase II; F:RNA polymerase II cis-regulatory region sequence-specific DNA binding; F:DNA-binding transcription activator activity, RNA polymerase II-specific;…
g393.t1	KAF7761273.1hypothetical protein Agabi119p4_10682	3	8.69e-101	74.06	1	F:GO:0003676	F:nucleic acid binding
g394.t1	KXN84186.1Gag-Pol polyprotein, partial	3	2.4e-17	63	1	F:GO:0005488	F:binding
g395.t1	KAF5359776.1hypothetical protein D9756_003322	3	0	91.15	14	P:GO:0006915; P:GO:0008152; F:GO:0016651; F:GO:0016668; F:GO:0046872; F:GO:0050660; F:GO:0051537; F:GO:0140907; C:GO:0005634; C:GO:0005743	P:apoptotic process; P:metabolic process; F:oxidoreductase activity, acting on NAD(P)H; F:oxidoreductase activity, acting on a sulfur group of donors, NAD(P) as acceptor; F:metal ion binding; F:flavin adenine dinucleotide binding; F:2 iron, 2 sulfur cluster binding; F:flavin-dependent halogenase activity; C:nucleus; C:mitochondrial inner membrane	EC:1.8.1; EC:1.6; EC:1.14	Acting on a sulfur group of donors; Acting on NADH or NADPH; Acting on paired donors, with incorporation or reduction of molecular oxygen. The oxygen incorporated need not be derived from O2
g396.t1	KAF5359290.1hypothetical protein D9756_003320	3	1.65e-253	66.27	11	P:GO:0000070; P:GO:0034087; P:GO:0042276; P:GO:0070987; P:GO:0071960; F:GO:0003887; F:GO:0052858; C:GO:0000785; C:GO:0005739; C:GO:0035861; C:GO:0043596	P:mitotic sister chromatid segregation; P:establishment of mitotic sister chromatid cohesion; P:error-prone translesion synthesis; P:error-free translesion synthesis; P:maintenance of mitotic sister chromatid cohesion, centromeric; F:DNA-directed DNA polymerase activity; F:peptidyl-lysine acetyltransferase activity; C:chromatin; C:mitochondrion; C:site of double-strand break; C:nuclear replicatio…	EC:2.7.7.7; EC:2.3.1	DNA-directed DNA polymerase; Acyltransferases
g397.t1	KAF9453455.1ras-like protein	3	2.14e-145	95.53	34	P:GO:0006468; P:GO:0007165; P:GO:0007186; P:GO:0007265; P:GO:0009847; P:GO:0010514; P:GO:0032488; P:GO:0032989; P:GO:0034307; P:GO:0044703; P:GO:0051128; P:GO:0071507; P:GO:0071963; P:GO:0072659; P:GO:0075306; P:GO:1900182; P:GO:1905708; P:GO:2000243; F:GO:0002134; F:GO:0002135; F:GO:0003924; F:GO:0005525; F:GO:0019003; F:GO:0032550; F:GO:0032551; C:GO:0000935; C:GO:0005886; C:GO:0016020; C:GO:00…	P:protein phosphorylation; P:signal transduction; P:G protein-coupled receptor signaling pathway; P:Ras protein signal transduction; P:spore germination; P:induction of conjugation with cellular fusion; P:Cdc42 protein signal transduction; P:cellular anatomical entity morphogenesis; P:regulation of ascospore formation; P:multi-organism reproductive process; P:regulation of cellular component orga…	EC:3.6.1.15	nucleoside-triphosphate phosphatase
g398.t1	KAI0671545.1WD40-repeat-containing domain protein	3	1e-273	70.94	12	P:GO:0006325; P:GO:0006378; P:GO:0018023; P:GO:0033048; P:GO:0045839; P:GO:1905213; F:GO:0003682; C:GO:0000228; C:GO:0000785; C:GO:0005847; C:GO:0048188; C:GO:1990567	P:chromatin organization; P:obsolete mRNA polyadenylation; P:peptidyl-lysine trimethylation; P:negative regulation of mitotic sister chromatid segregation; P:negative regulation of mitotic nuclear division; P:negative regulation of mitotic chromosome condensation; F:chromatin binding; C:nuclear chromosome; C:chromatin; C:mRNA cleavage and polyadenylation specificity factor complex; C:Set1C/COMPAS…
g399.t1	KAF5359535.1hypothetical protein D9756_003314	3	5.1e-100	95.83	12	P:GO:0006351; P:GO:0006360; P:GO:0006366; P:GO:0042797; F:GO:0003677; F:GO:0003899; C:GO:0005665; C:GO:0005666; C:GO:0005736; C:GO:0055029	P:DNA-templated transcription; P:transcription by RNA polymerase I; P:transcription by RNA polymerase II; P:tRNA transcription by RNA polymerase III; F:DNA binding; F:DNA-directed 5'-3' RNA polymerase activity; C:RNA polymerase II, core complex; C:RNA polymerase III complex; C:RNA polymerase I complex; C:nuclear DNA-directed RNA polymerase complex	EC:2.7.7.6	DNA-directed RNA polymerase
g400.t1	KAF5359538.1hypothetical protein D9756_003313	3	5.38e-222	90.25	4	F:GO:0016829; F:GO:0046872	F:lyase activity; F:metal ion binding	EC:4	Lyases
g401.t1	KAJ3560922.1hypothetical protein NP233_g10518	3	0	85.4	23	P:GO:0006805; P:GO:0016310; P:GO:0019279; P:GO:0019287; P:GO:0019343; P:GO:0019346; P:GO:0071266; F:GO:0003962; F:GO:0004121; F:GO:0004123; F:GO:0004496; F:GO:0005524; F:GO:0030170; C:GO:0005634; C:GO:0005737; C:GO:0005777	P:xenobiotic metabolic process; P:phosphorylation; P:L-methionine biosynthetic process from L-homoserine via cystathionine; P:isopentenyl diphosphate biosynthetic process, mevalonate pathway; P:cysteine biosynthetic process via cystathionine; P:transsulfuration; P:'de novo' L-methionine biosynthetic process; F:cystathionine gamma-synthase activity; F:cystathionine beta-lyase activity; F:cystathio…	EC:2.5.1.48; EC:4.4.1.8; EC:4.4.1.1; EC:2.7.1.36	cystathionine gamma-synthase; Carbon-sulfur lyases; cystathionine gamma-lyase; mevalonate kinase
g402.t1	KAF5359312.1hypothetical protein D9756_003310	3	0	96.83	6	P:GO:0019878; F:GO:0004410; C:GO:0005634; C:GO:0005739	P:lysine biosynthetic process via aminoadipic acid; F:homocitrate synthase activity; C:nucleus; C:mitochondrion	EC:2.3.3.14	homocitrate synthase
g403.t1	KAF5348782.1hypothetical protein D9756_009847	3	1.84e-76	61.84	4	F:GO:0003676; F:GO:0008270; C:GO:0005634; C:GO:0043227	F:nucleic acid binding; F:zinc ion binding; C:nucleus; C:membrane-bounded organelle
g404.t1	KAJ3560359.1hypothetical protein NP233_g10892	3	0	75.13	1	F:GO:0005488	F:binding
g406.t1	KAF7785134.1hypothetical protein Agabi119p4_1299	3	1.45e-261	75.54	4	P:GO:0015074; F:GO:0003676; F:GO:0003723; C:GO:0005634	P:DNA integration; F:nucleic acid binding; F:RNA binding; C:nucleus
g407.t1	KAF7760507.1transcriptional regulator family: Zinc finger, CCHC-type	3	6.67e-39	60.51	3	F:GO:0003676; F:GO:0008270; C:GO:0005634	F:nucleic acid binding; F:zinc ion binding; C:nucleus
g408.t1	KAF5350648.1hypothetical protein D9756_008714	3	3.88e-74	87.2	2	F:GO:0016805	F:dipeptidase activity	EC:3.4.13	Acting on peptide bonds (peptidases)
g409.t1	KAF5350570.1hypothetical protein D9756_008745	3	1.21e-149	84.9	4	F:GO:0004029; F:GO:0043878	F:aldehyde dehydrogenase (NAD+) activity; F:glyceraldehyde-3-phosphate dehydrogenase (NAD+) (non-phosphorylating) activity	EC:1.2.1.5; EC:1.2.1.3	aldehyde dehydrogenase [NAD(P)(+)]; aldehyde dehydrogenase (NAD(+))
g410.t1	KAF9445040.1hypothetical protein P691DRAFT_806222	3	3.99e-121	96.14	1	C:GO:0016020	C:membrane
g411.t1	KAF5348782.1hypothetical protein D9756_009847	3	1.19e-42	58.34	4	F:GO:0003676; F:GO:0008270; C:GO:0005634; C:GO:0043227	F:nucleic acid binding; F:zinc ion binding; C:nucleus; C:membrane-bounded organelle
g412.t1	KAF5360975.1hypothetical protein D9756_004486	2	5.25e-49	59.24	3	F:GO:0003676; F:GO:0008270; C:GO:0005634	F:nucleic acid binding; F:zinc ion binding; C:nucleus
g414.t1	KAF9445612.1small oligopeptide transporter	3	0	77.55	2	P:GO:0015833; P:GO:0055085	P:peptide transport; P:transmembrane transport
g415.t1	KAF5355900.1hypothetical protein D9756_004357	3	3.8e-102	85.63	1	C:GO:0016020	C:membrane
g417.t1	KAF5356216.1hypothetical protein D9756_004329	3	8.34e-142	55.36	4	P:GO:0006338; P:GO:0006355; F:GO:0140849; C:GO:0005634	P:chromatin remodeling; P:regulation of DNA-templated transcription; F:ATP-dependent H2AZ histone chaperone activity; C:nucleus
g418.t1	KAF5349912.1hypothetical protein D9756_009304	3	6.24e-98	48.16
g419.t1	KAF5348569.1hypothetical protein D9756_009658	3	6.84e-282	81.8	1	F:GO:0016740	F:transferase activity	EC:2	Transferases
g420.t1	KXN88390.1GDP-mannose 3,5-epimerase 2	3	0	80.9
g421.t1	KAF7773493.1transcriptional regulator family: Zinc finger, CCHC-type	3	1.16e-268	69.78	1	F:GO:0005488	F:binding
g422.t1	KAF5356235.1hypothetical protein D9756_004173	3	2.22e-258	70.65
g423.t1	KAF5356236.1hypothetical protein D9756_004174	3	0	62.36	11	P:GO:0007020; P:GO:0051455; P:GO:1902426; P:GO:1990299; P:GO:1990758; F:GO:0005200; F:GO:0051010; C:GO:0000794; C:GO:0000939; C:GO:0005739; C:GO:0005816	P:microtubule nucleation; P:spindle attachment to meiosis I kinetochore; P:deactivation of mitotic spindle assembly checkpoint; P:Bub1-Bub3 complex localization to kinetochore; P:mitotic sister chromatid biorientation; F:structural constituent of cytoskeleton; F:microtubule plus-end binding; C:condensed nuclear chromosome; C:inner kinetochore; C:mitochondrion; C:spindle pole body
g424.t1	KAF4623980.1hypothetical protein D9613_001690	3	0	72.08	6	F:GO:0000166; F:GO:0003774; C:GO:0005856	F:nucleotide binding; F:cytoskeletal motor activity; C:cytoskeleton
g425.t1	KAF5356241.1hypothetical protein D9756_004179	3	0	87.5	4	P:GO:0006869; P:GO:0061817; F:GO:0008289; C:GO:0016020	P:lipid transport; P:endoplasmic reticulum-plasma membrane tethering; F:lipid binding; C:membrane
g426.t1	PPQ92696.1hypothetical protein CVT25_014003	3	0	69.36	2	F:GO:0010945; C:GO:0016020	F:coenzyme A diphosphatase activity; C:membrane
g427.t1	KAF5355965.1hypothetical protein D9756_004182	3	0	85.47	24	P:GO:0006511; P:GO:0015031; P:GO:0015833; P:GO:0030970; P:GO:0051228; P:GO:0051974; P:GO:0070651; P:GO:0071629; P:GO:0072671; P:GO:1900182; P:GO:1990116; F:GO:0031625; F:GO:0043130; C:GO:0000837; C:GO:0000839; C:GO:0005789; C:GO:0005829; C:GO:0031965; C:GO:0034098; C:GO:0036266; C:GO:0048471; C:GO:1990112	P:ubiquitin-dependent protein catabolic process; P:protein transport; P:peptide transport; P:retrograde protein transport, ER to cytosol; P:mitotic spindle disassembly; P:negative regulation of telomerase activity; P:nonfunctional rRNA decay; P:cytoplasm protein quality control by the ubiquitin-proteasome system; P:mitochondria-associated ubiquitin-dependent protein catabolic process; P:positive …
g428.t1	KAF5355964.1hypothetical protein D9756_004183	3	2.53e-37	86.7	2	P:GO:0006355; F:GO:0003700	P:regulation of DNA-templated transcription; F:DNA-binding transcription factor activity
g429.t1	PPQ66109.1hypothetical protein CVT26_010910, partial	3	4.29e-305	71.78	5	P:GO:0008152; P:GO:0009987; F:GO:0003824; F:GO:0051536; C:GO:0110165	P:metabolic process; P:cellular process; F:catalytic activity; F:iron-sulfur cluster binding; C:cellular anatomical entity
g430.t1	KXN83619.1U2 small nuclear ribonucleoprotein A'	3	8.97e-143	92.15	9	P:GO:0000398; P:GO:0045292; F:GO:0030620; F:GO:1901363; C:GO:0005686; C:GO:0005737; C:GO:0071004; C:GO:0071014	P:mRNA splicing, via spliceosome; P:mRNA cis splicing, via spliceosome; F:U2 snRNA binding; F:heterocyclic compound binding; C:U2 snRNP; C:cytoplasm; C:U2-type prespliceosome; C:post-mRNA release spliceosomal complex
g431.t1	KAF9442633.1hypothetical protein P691DRAFT_738773, partial	3	8.55e-81	69.94
g433.t1	KAF9442633.1hypothetical protein P691DRAFT_738773, partial	3	5.09e-64	68.16
g434.t1	KAJ3557824.1hypothetical protein NP233_g11645	3	1.22e-227	88.61	15	P:GO:0006413; P:GO:0006805; P:GO:0019284; P:GO:0019509; F:GO:0003743; F:GO:0046523; C:GO:0005634; C:GO:0005737	P:translational initiation; P:xenobiotic metabolic process; P:L-methionine salvage from S-adenosylmethionine; P:L-methionine salvage from methylthioadenosine; F:translation initiation factor activity; F:S-methyl-5-thioribose-1-phosphate isomerase activity; C:nucleus; C:cytoplasm	EC:5.3.1.23	S-methyl-5-thioribose-1-phosphate isomerase
g435.t1	KXN91044.1RNA polymerase II transcription factor B subunit 4	3	5.67e-119	74.8	17	P:GO:0006281; P:GO:0006289; P:GO:0006355; P:GO:0006357; P:GO:0006367; P:GO:0006412; P:GO:0006468; F:GO:0003684; F:GO:0003723; F:GO:0008135; F:GO:0140110; F:GO:1901363; C:GO:0000112; C:GO:0000439; C:GO:0005675; C:GO:0090575; C:GO:1990391	P:DNA repair; P:nucleotide-excision repair; P:regulation of DNA-templated transcription; P:regulation of transcription by RNA polymerase II; P:transcription initiation at RNA polymerase II promoter; P:translation; P:protein phosphorylation; F:damaged DNA binding; F:RNA binding; F:translation factor activity, RNA binding; F:transcription regulator activity; F:heterocyclic compound binding; C:nucle…
g436.t1	KAF5351963.1hypothetical protein D9756_007561	3	0	94.16	31	P:GO:0001178; P:GO:0006338; P:GO:0006363; P:GO:0006368; P:GO:0006369; P:GO:0010558; P:GO:0016567; P:GO:0034728; P:GO:0043254; P:GO:0065008; P:GO:0071103; P:GO:1905268; P:GO:2000104; P:GO:2000757; P:GO:2001251; F:GO:0000182; F:GO:0000976; F:GO:0005524; F:GO:0016787; F:GO:0016887; F:GO:0031490; F:GO:0035064; F:GO:0140658; C:GO:0000124; C:GO:0005634; C:GO:0005654; C:GO:0005739; C:GO:0030874; C:GO:00…	P:regulation of transcriptional start site selection at RNA polymerase II promoter; P:chromatin remodeling; P:termination of RNA polymerase I transcription; P:transcription elongation by RNA polymerase II; P:termination of RNA polymerase II transcription; P:negative regulation of macromolecule biosynthetic process; P:protein ubiquitination; P:nucleosome organization; P:regulation of protein-conta…	EC:3.6.1.15	nucleoside-triphosphate phosphatase
g437.t1	KAJ3568860.1hypothetical protein NP233_g5432	3	0	77.15	3	P:GO:0006886; C:GO:0000139; C:GO:0017119	P:intracellular protein transport; C:Golgi membrane; C:Golgi transport complex
g439.t1	KAF5351893.1hypothetical protein D9756_007552	3	0	96.96	9	P:GO:0006805; P:GO:0016999; P:GO:0019679; F:GO:0047547; F:GO:0051537; C:GO:0005741	P:xenobiotic metabolic process; P:antibiotic metabolic process; P:propionate metabolic process, methylcitrate cycle; F:2-methylcitrate dehydratase activity; F:2 iron, 2 sulfur cluster binding; C:mitochondrial outer membrane	EC:4.2.1.79	2-methylcitrate dehydratase
g440.t1	KAF5351894.1hypothetical protein D9756_007551	3	0	81.67	17	P:GO:0000103; P:GO:0009086; P:GO:0010134; P:GO:0019344; P:GO:0019379; P:GO:0070814; F:GO:0004020; F:GO:0004781; F:GO:0005524; C:GO:0005737; C:GO:0005739	P:sulfate assimilation; P:methionine biosynthetic process; P:sulfate assimilation via adenylyl sulfate reduction; P:cysteine biosynthetic process; P:sulfate assimilation, phosphoadenylyl sulfate reduction by phosphoadenylyl-sulfate reductase (thioredoxin); P:hydrogen sulfide biosynthetic process; F:adenylylsulfate kinase activity; F:sulfate adenylyltransferase (ATP) activity; F:ATP binding; C:cyt…	EC:2.7.7.4; EC:2.7.1.25	sulfate adenylyltransferase; adenylyl-sulfate kinase
g441.t1	KAF5356289.1hypothetical protein D9756_004190	3	1.39e-133	72.87	2	F:GO:0000166	F:nucleotide binding
g442.t1	KXN83613.1COP9 signalosome complex subunit 6	3	7.23e-175	93.19	11	P:GO:0000338; P:GO:0006508; P:GO:0044237; P:GO:0044703; P:GO:0070791; F:GO:0008237; C:GO:0005737; C:GO:0008180	P:protein deneddylation; P:proteolysis; P:cellular metabolic process; P:multi-organism reproductive process; P:cleistothecium development; F:metallopeptidase activity; C:cytoplasm; C:COP9 signalosome	EC:3.4	Acting on peptide bonds (peptidases)
g443.t1	KAF5356287.1hypothetical protein D9756_004192	3	0	93.78	35	P:GO:0000727; P:GO:0006267; P:GO:0030174; P:GO:0031509; P:GO:0032508; P:GO:0033260; P:GO:0045815; P:GO:0045892; P:GO:0045893; P:GO:0051097; P:GO:0051346; P:GO:1902975; P:GO:1905268; P:GO:2001251; F:GO:0003682; F:GO:0003688; F:GO:0004386; F:GO:0005524; F:GO:0016887; C:GO:0000781; C:GO:0005656; C:GO:0005737; C:GO:0031261; C:GO:0031298; C:GO:0042555; C:GO:0043596; C:GO:0071162	P:double-strand break repair via break-induced replication; P:pre-replicative complex assembly involved in nuclear cell cycle DNA replication; P:regulation of DNA-templated DNA replication initiation; P:subtelomeric heterochromatin formation; P:DNA duplex unwinding; P:nuclear DNA replication; P:transcription initiation-coupled chromatin remodeling; P:negative regulation of DNA-templated transcrip…	EC:3.6.1.15	nucleoside-triphosphate phosphatase
g444.t1	KAJ3576132.1hypothetical protein NP233_g622	3	2.01e-114	74.33
g445.t1	KAF5356291.1hypothetical protein D9756_004196	3	1.26e-141	74.02	8	P:GO:0010628; P:GO:0045944; P:GO:0051123; F:GO:0003713; C:GO:0005634; C:GO:0016591; C:GO:0016592; C:GO:0070847	P:positive regulation of gene expression; P:positive regulation of transcription by RNA polymerase II; P:RNA polymerase II preinitiation complex assembly; F:transcription coactivator activity; C:nucleus; C:RNA polymerase II, holoenzyme; C:mediator complex; C:core mediator complex
g446.t1	KAJ3576125.1hypothetical protein NP233_g625	3	0	72.11	6	P:GO:0006109; P:GO:0006357; P:GO:1902680; F:GO:0003713; C:GO:0005634; C:GO:0005737	P:regulation of carbohydrate metabolic process; P:regulation of transcription by RNA polymerase II; P:positive regulation of RNA biosynthetic process; F:transcription coactivator activity; C:nucleus; C:cytoplasm
g447.t1	KAF5356022.1hypothetical protein D9756_004202	3	2.04e-38	65.2	5	P:GO:0006281; P:GO:0006974; F:GO:0016504; F:GO:0070577; F:GO:0070628	P:DNA repair; P:DNA damage response; F:peptidase activator activity; F:lysine-acetylated histone binding; F:proteasome binding
g448.t1	KAF5356022.1hypothetical protein D9756_004202	3	8.6e-290	87.34	4	P:GO:0006281; F:GO:0016504; F:GO:0070577; F:GO:0070628	P:DNA repair; F:peptidase activator activity; F:lysine-acetylated histone binding; F:proteasome binding
g449.t1	CDJ79829.1pectate lyase precursor	3	1.63e-191	92.12	4	F:GO:0030570; C:GO:0016020	F:pectate lyase activity; C:membrane	EC:4.2.2.2	pectate lyase
g450.t1	KAJ3574828.1hypothetical protein NP233_g1496	3	6.55e-203	87.03	11	P:GO:0006357; P:GO:0006367; P:GO:0051123; P:GO:1902680; F:GO:0000976; F:GO:0003713; F:GO:0008134; F:GO:0035035; F:GO:1901363; C:GO:0005669	P:regulation of transcription by RNA polymerase II; P:transcription initiation at RNA polymerase II promoter; P:RNA polymerase II preinitiation complex assembly; P:positive regulation of RNA biosynthetic process; F:transcription cis-regulatory region binding; F:transcription coactivator activity; F:transcription factor binding; F:histone acetyltransferase binding; F:heterocyclic compound binding;…
g451.t1	KAF5357897.1hypothetical protein D9756_001419	3	8.81e-121	69.17	2	F:GO:0008233	F:peptidase activity	EC:3.4	Acting on peptide bonds (peptidases)
g452.t1	KAF5358366.1hypothetical protein D9756_001420	3	0	77.66	2	F:GO:0005509; C:GO:0016020	F:calcium ion binding; C:membrane
g453.t1	KAJ3560743.1hypothetical protein NP233_g10635	3	2.43e-230	74.67	15	P:GO:0000056; P:GO:0000282; P:GO:0000447; P:GO:0006405; P:GO:0006611; P:GO:0015833; P:GO:0070476; P:GO:0071166; F:GO:0016435; F:GO:0070043; C:GO:0005634; C:GO:0005730; C:GO:0005737	P:ribosomal small subunit export from nucleus; P:cellular bud site selection; P:endonucleolytic cleavage in ITS1 to separate SSU-rRNA from 5.8S rRNA and LSU-rRNA from tricistronic rRNA transcript (SSU-rRNA, 5.8S rRNA, LSU-rRNA); P:RNA export from nucleus; P:protein export from nucleus; P:peptide transport; P:rRNA (guanine-N7)-methylation; P:ribonucleoprotein complex localization; F:rRNA (guanine)…	EC:2.1.1	Transferring one-carbon groups
g454.t1	KAF5358361.1hypothetical protein D9756_001425	3	2.25e-105	93.16	10	P:GO:0006412; P:GO:0032543; P:GO:0042254; F:GO:0003723; F:GO:0003735; C:GO:0005763; C:GO:0005840; C:GO:1990904	P:translation; P:mitochondrial translation; P:ribosome biogenesis; F:RNA binding; F:structural constituent of ribosome; C:mitochondrial small ribosomal subunit; C:ribosome; C:ribonucleoprotein complex
g455.t1	KAJ3560745.1hypothetical protein NP233_g10637	3	2.82e-184	88.55	5	P:GO:0006325; P:GO:0051276; C:GO:0000228; C:GO:0000785; C:GO:0005634	P:chromatin organization; P:chromosome organization; C:nuclear chromosome; C:chromatin; C:nucleus
g456.t1	KIN94834.1hypothetical protein M404DRAFT_167238	3	2.8e-05	67.82	3	F:GO:0003676; F:GO:0008270; C:GO:0005634	F:nucleic acid binding; F:zinc ion binding; C:nucleus
g457.t1	KAJ3560477.1hypothetical protein NP233_g10816	3	2.57e-135	72.5
g458.t1	XP_006457283.1hypothetical protein AGABI2DRAFT_123158	3	1.92e-60	58.76	3	F:GO:0003676; F:GO:0008270; C:GO:0005634	F:nucleic acid binding; F:zinc ion binding; C:nucleus
g459.t1	KAF5350717.1hypothetical protein D9756_008603	3	4.9e-120	70.8	2	P:GO:0006511; F:GO:0031625	P:ubiquitin-dependent protein catabolic process; F:ubiquitin protein ligase binding
g460.t1	KAF5347014.1hypothetical protein D9756_011001	3	6.83e-37	63.68	1	F:GO:0003824	F:catalytic activity
g462.t1	KAF7762732.1hypothetical protein Agabi119p4_9325	3	8.89e-42	68.11
g463.t1	KAF5364008.1hypothetical protein D9756_000527	3	4.92e-243	81.79	1	F:GO:0000166	F:nucleotide binding
g464.t1	KAF5363446.1hypothetical protein D9756_000528	3	4.43e-134	82.6
g465.t1	KAF5363445.1hypothetical protein D9756_000529	3	6.62e-164	95.24	17	P:GO:0010499; P:GO:0031331; P:GO:0032436; P:GO:0043161; P:GO:0045842; P:GO:0051781; P:GO:0062033; F:GO:0004298; C:GO:0005634; C:GO:0005737; C:GO:0005789; C:GO:0019774; C:GO:0031597; C:GO:0034515	P:proteasomal ubiquitin-independent protein catabolic process; P:positive regulation of cellular catabolic process; P:positive regulation of proteasomal ubiquitin-dependent protein catabolic process; P:proteasome-mediated ubiquitin-dependent protein catabolic process; P:positive regulation of mitotic metaphase/anaphase transition; P:positive regulation of cell division; P:positive regulation of m…	EC:3.4.25	Acting on peptide bonds (peptidases)
g466.t1	KAF5364002.1hypothetical protein D9756_000532	3	1.92e-166	90.18	27	P:GO:0000727; P:GO:0006270; P:GO:0006508; P:GO:0010628; P:GO:0016485; P:GO:0031331; P:GO:0032392; P:GO:0032436; P:GO:0032933; P:GO:0033314; P:GO:0043248; P:GO:0045842; P:GO:0045944; P:GO:0051781; P:GO:0062033; P:GO:1902977; F:GO:0003688; F:GO:0003697; F:GO:1901363; C:GO:0000228; C:GO:0000785; C:GO:0005838; C:GO:0008541; C:GO:0031261; C:GO:0031597; C:GO:0034399; C:GO:0034515	P:double-strand break repair via break-induced replication; P:DNA replication initiation; P:proteolysis; P:positive regulation of gene expression; P:protein processing; P:positive regulation of cellular catabolic process; P:DNA geometric change; P:positive regulation of proteasomal ubiquitin-dependent protein catabolic process; P:SREBP signaling pathway; P:mitotic DNA replication checkpoint signa…
g467.t1	KAF8639918.1hypothetical protein AX17_001169	3	1.15e-78	67.77	13	P:GO:0010499; P:GO:0031331; P:GO:0032436; P:GO:0045842; P:GO:0051781; P:GO:0062033; F:GO:0003729; F:GO:1901363; C:GO:0005634; C:GO:0019773; C:GO:0031597; C:GO:0034515; C:GO:0042175	P:proteasomal ubiquitin-independent protein catabolic process; P:positive regulation of cellular catabolic process; P:positive regulation of proteasomal ubiquitin-dependent protein catabolic process; P:positive regulation of mitotic metaphase/anaphase transition; P:positive regulation of cell division; P:positive regulation of mitotic sister chromatid segregation; F:mRNA binding; F:heterocyclic c…
g468.t1	KAF5364235.1hypothetical protein D9756_000534	3	0	86.99	18	P:GO:0000055; P:GO:0000056; P:GO:0006406; P:GO:0006606; P:GO:0006611; P:GO:0015031; P:GO:0015833; P:GO:0017038; P:GO:0051028; P:GO:0071166; F:GO:0005215; F:GO:0017056; C:GO:0005643; C:GO:0044612; C:GO:0044614	P:ribosomal large subunit export from nucleus; P:ribosomal small subunit export from nucleus; P:mRNA export from nucleus; P:protein import into nucleus; P:protein export from nucleus; P:protein transport; P:peptide transport; P:protein import; P:mRNA transport; P:ribonucleoprotein complex localization; F:transporter activity; F:structural constituent of nuclear pore; C:nuclear pore; C:nuclear por…
g469.t1	KAF5363997.1hypothetical protein D9756_000535	3	0	91.74	3	P:GO:0055085; F:GO:0022857; C:GO:0016020	P:transmembrane transport; F:transmembrane transporter activity; C:membrane
g470.t1	KAF5364237.1hypothetical protein D9756_000536	3	1e-233	89.37	2	P:GO:0005975	P:carbohydrate metabolic process
g471.t1	KAF5363579.1hypothetical protein D9756_000540	3	1.91e-65	90.08	21	P:GO:0006338; P:GO:0006352; P:GO:0010628; P:GO:0018393; P:GO:0045944; P:GO:0051123; P:GO:0051276; F:GO:0000976; F:GO:0003682; F:GO:0005198; F:GO:0008134; F:GO:0046982; F:GO:0060090; F:GO:0140110; F:GO:1901363; C:GO:0000124; C:GO:0000228; C:GO:0005634; C:GO:0005669; C:GO:0046695	P:chromatin remodeling; P:DNA-templated transcription initiation; P:positive regulation of gene expression; P:internal peptidyl-lysine acetylation; P:positive regulation of transcription by RNA polymerase II; P:RNA polymerase II preinitiation complex assembly; P:chromosome organization; F:transcription cis-regulatory region binding; F:chromatin binding; F:structural molecule activity; F:transcrip…
g472.t1	KXN86363.1Iron sulfur cluster assembly protein 1, mitochondrial	3	9.26e-91	90.18	14	P:GO:0006790; P:GO:0006879; P:GO:0016226; P:GO:0044571; P:GO:0065008; P:GO:0097428; F:GO:0005506; F:GO:0008198; F:GO:0036455; F:GO:0051537; F:GO:0051539; C:GO:0005759	P:sulfur compound metabolic process; P:intracellular iron ion homeostasis; P:iron-sulfur cluster assembly; P:[2Fe-2S] cluster assembly; P:regulation of biological quality; P:protein maturation by iron-sulfur cluster transfer; F:iron ion binding; F:ferrous iron binding; F:iron-sulfur transferase activity; F:2 iron, 2 sulfur cluster binding; F:4 iron, 4 sulfur cluster binding; C:mitochondrial matrix	EC:2.8	Transferring sulfur-containing groups
g473.t1	KAF5363581.1hypothetical protein D9756_000542	3	1.95e-293	88.61	11	P:GO:0000244; P:GO:0045292; F:GO:0003723; C:GO:0005681; C:GO:0005687; C:GO:0005739; C:GO:0046540; C:GO:0071011	P:spliceosomal tri-snRNP complex assembly; P:mRNA cis splicing, via spliceosome; F:RNA binding; C:spliceosomal complex; C:U4 snRNP; C:mitochondrion; C:U4/U6 x U5 tri-snRNP complex; C:precatalytic spliceosome
g474.t1	KAF5363580.1hypothetical protein D9756_000543	3	5.15e-305	79.51	17	P:GO:0010515; P:GO:0010972; P:GO:0018105; P:GO:0018107; P:GO:0023052; P:GO:0032092; P:GO:0034599; P:GO:0050821; P:GO:0071470; P:GO:1900181; P:GO:2000242; F:GO:0004683; F:GO:0005516; F:GO:0005524; C:GO:0005730; C:GO:0005737; C:GO:0042764	P:negative regulation of induction of conjugation with cellular fusion; P:negative regulation of G2/M transition of mitotic cell cycle; P:peptidyl-serine phosphorylation; P:peptidyl-threonine phosphorylation; P:signaling; P:positive regulation of protein binding; P:cellular response to oxidative stress; P:protein stabilization; P:cellular response to osmotic stress; P:negative regulation of prote…	EC:2.7.11.17	calcium/calmodulin-dependent protein kinase
g475.t1	KAF5350475.1hypothetical protein D9756_008608	3	7.07e-60	66.9
g476.t1	OBZ71294.1Retrovirus-related Pol polyprotein from transposon TNT 1-94	3	5.57e-10	69.3	2	P:GO:0006259; F:GO:0005488	P:DNA metabolic process; F:binding
g477.t1	KAJ3566056.1hypothetical protein NP233_g7240	3	1.41e-292	88.1
g478.t1	KAF5361779.1hypothetical protein D9756_002318	3	0	83.97	14	P:GO:0006338; P:GO:0032259; F:GO:0005524; F:GO:0008757; F:GO:0016787; F:GO:0140658; C:GO:0005634	P:chromatin remodeling; P:methylation; F:ATP binding; F:S-adenosylmethionine-dependent methyltransferase activity; F:hydrolase activity; F:ATP-dependent chromatin remodeler activity; C:nucleus	EC:3; EC:2.1.1	Hydrolases; Transferring one-carbon groups
g479.t1	ESK85162.1ubiquitin	3	3.42e-105	98.74	10	P:GO:0000028; P:GO:0002109; P:GO:0002181; P:GO:0006412; F:GO:0003735; F:GO:0031386; C:GO:0005840; C:GO:0022627; C:GO:1990904	P:ribosomal small subunit assembly; P:maturation of SSU-rRNA from tricistronic rRNA transcript (SSU-rRNA, LSU-rRNA,5S); P:cytoplasmic translation; P:translation; F:structural constituent of ribosome; F:protein tag activity; C:ribosome; C:cytosolic small ribosomal subunit; C:ribonucleoprotein complex
g480.t1	KAF5362305.1hypothetical protein D9756_002325	3	3.34e-205	95.36	25	P:GO:0000819; P:GO:0006271; P:GO:0006298; P:GO:0007062; P:GO:0009059; P:GO:0016070; P:GO:0070914; P:GO:0090618; P:GO:1903460; F:GO:0003677; F:GO:0005524; F:GO:0016887; F:GO:0061860; C:GO:0000785; C:GO:0005829; C:GO:0031389; C:GO:0031390; C:GO:0031391; C:GO:0043599; C:GO:1904949	P:sister chromatid segregation; P:DNA strand elongation involved in DNA replication; P:mismatch repair; P:sister chromatid cohesion; P:macromolecule biosynthetic process; P:RNA metabolic process; P:UV-damage excision repair; P:DNA clamp unloading; P:mitotic DNA replication leading strand elongation; F:DNA binding; F:ATP binding; F:ATP hydrolysis activity; F:DNA clamp unloader activity; C:chromati…	EC:3.6.1.15	nucleoside-triphosphate phosphatase
g481.t1	KAF5362304.1hypothetical protein D9756_002326	3	0	75.41	2	P:GO:0006355; F:GO:0005488	P:regulation of DNA-templated transcription; F:binding
g482.t1	KAF5355705.1hypothetical protein D9756_003947	3	2.69e-305	81.68	20	P:GO:0000742; P:GO:0001403; P:GO:0006887; P:GO:0006897; P:GO:0007124; P:GO:0010922; P:GO:0030011; P:GO:0034727; P:GO:0035621; P:GO:0044703; P:GO:0120011; F:GO:0005545; F:GO:0008142; F:GO:0015248; F:GO:0043168; C:GO:0005829; C:GO:0005886; C:GO:0032541; C:GO:0032991; C:GO:0099568	P:karyogamy involved in conjugation with cellular fusion; P:invasive growth in response to glucose limitation; P:exocytosis; P:endocytosis; P:pseudohyphal growth; P:positive regulation of phosphatase activity; P:maintenance of cell polarity; P:piecemeal microautophagy of the nucleus; P:ER to Golgi ceramide transport; P:multi-organism reproductive process; P:intermembrane sterol transfer; F:1-phos…
g483.t1	KAF5356285.1hypothetical protein D9756_003948	3	0	93.93	18	P:GO:0006098; P:GO:0006754; P:GO:0006805; P:GO:0009051; P:GO:0009168; P:GO:0016310; P:GO:0019359; P:GO:0019521; P:GO:0019682; P:GO:0034404; P:GO:0042866; P:GO:0046177; P:GO:0061688; F:GO:0004616; F:GO:0050661; C:GO:0005739	P:pentose-phosphate shunt; P:ATP biosynthetic process; P:xenobiotic metabolic process; P:pentose-phosphate shunt, oxidative branch; P:purine ribonucleoside monophosphate biosynthetic process; P:phosphorylation; P:nicotinamide nucleotide biosynthetic process; P:D-gluconate metabolic process; P:glyceraldehyde-3-phosphate metabolic process; P:nucleobase-containing small molecule biosynthetic process…	EC:1.1.1.44	phosphogluconate dehydrogenase (NADP(+)-dependent, decarboxylating)
g484.t1	XP_007325548.1hypothetical protein AGABI1DRAFT_110331	3	7.4e-279	91.89	12	P:GO:0000184; P:GO:0022618; P:GO:0034063; P:GO:0043488; F:GO:0003723; F:GO:0003729; F:GO:0008266; F:GO:1901363; C:GO:0000932; C:GO:0005634; C:GO:0010494; C:GO:1990904	P:nuclear-transcribed mRNA catabolic process, nonsense-mediated decay; P:protein-RNA complex assembly; P:stress granule assembly; P:regulation of mRNA stability; F:RNA binding; F:mRNA binding; F:poly(U) RNA binding; F:heterocyclic compound binding; C:P-body; C:nucleus; C:cytoplasmic stress granule; C:ribonucleoprotein complex
g485.t1	KAF5355624.1hypothetical protein D9756_003950	3	1.17e-144	86.34	4	P:GO:0000045; P:GO:0006807; P:GO:0043170; P:GO:0044238	P:autophagosome assembly; P:nitrogen compound metabolic process; P:macromolecule metabolic process; P:primary metabolic process
g486.t1	KAF5355623.1hypothetical protein D9756_003951	3	0	69.04	4	F:GO:0003924; F:GO:0005525	F:GTPase activity; F:GTP binding	EC:3.6.1.15	nucleoside-triphosphate phosphatase
g487.t1	KAJ3569282.1hypothetical protein NP233_g5151	3	1.34e-281	81.57	9	P:GO:0005975; P:GO:0006098; P:GO:0009051; P:GO:0019682; P:GO:0019693; F:GO:0017057; C:GO:0005737	P:carbohydrate metabolic process; P:pentose-phosphate shunt; P:pentose-phosphate shunt, oxidative branch; P:glyceraldehyde-3-phosphate metabolic process; P:ribose phosphate metabolic process; F:6-phosphogluconolactonase activity; C:cytoplasm	EC:3.1.1.31	6-phosphogluconolactonase
g488.t1	KAJ3574131.1hypothetical protein NP233_g1967	3	1.2e-42	80.92	3	P:GO:0055085; F:GO:0022857; C:GO:0016020	P:transmembrane transport; F:transmembrane transporter activity; C:membrane
g489.t1	KAF7768364.1CAZyme family GH5	3	0	63.73	5	P:GO:0008152; P:GO:0071704; F:GO:0004553; F:GO:0016798; C:GO:0016020	P:metabolic process; P:organic substance metabolic process; F:hydrolase activity, hydrolyzing O-glycosyl compounds; F:hydrolase activity, acting on glycosyl bonds; C:membrane
g490.t1	KAF5348591.1hypothetical protein D9756_009617	3	4.6e-185	93.03	6	P:GO:0006659; F:GO:0106245; C:GO:0005789	P:phosphatidylserine biosynthetic process; F:L-serine-phosphatidylethanolamine phosphatidyltransferase activity; C:endoplasmic reticulum membrane	EC:2.7.8.29	L-serine-phosphatidylethanolamine phosphatidyltransferase
g491.t1	KAF5348590.1hypothetical protein D9756_009616	3	1.99e-113	58.33	1	P:GO:0006355	P:regulation of DNA-templated transcription
g492.t1	KAF5348592.1hypothetical protein D9756_009614	3	1.23e-156	72.39
g493.t1	KAF5348587.1hypothetical protein D9756_009613	3	0	80.91	16	P:GO:0006406; P:GO:0006606; P:GO:0006611; P:GO:0015833; P:GO:0017038; P:GO:0031503; P:GO:0071166; F:GO:0005049; F:GO:0005215; F:GO:0005525; F:GO:0032550; F:GO:0061608; C:GO:0005643; C:GO:0005829; C:GO:0016020; C:GO:0034399	P:mRNA export from nucleus; P:protein import into nucleus; P:protein export from nucleus; P:peptide transport; P:protein import; P:protein-containing complex localization; P:ribonucleoprotein complex localization; F:nuclear export signal receptor activity; F:transporter activity; F:GTP binding; F:purine ribonucleoside binding; F:nuclear import signal receptor activity; C:nuclear pore; C:cytosol; …
g494.t1	KXN84716.1hypothetical protein AN958_12143	3	6.33e-80	93.72	1	F:GO:0005525	F:GTP binding
g495.t1	KXN81673.1Mitotic spindle checkpoint component mad3	3	1.3e-164	65.84	2	P:GO:0007094; C:GO:0043229	P:mitotic spindle assembly checkpoint signaling; C:intracellular organelle	EC:2.7.11.1	non-specific serine/threonine protein kinase
g496.t1	KAF5357025.1hypothetical protein D9756_006674	3	0	83.89	1	F:GO:0003676	F:nucleic acid binding
g497.t1	KAJ3560477.1hypothetical protein NP233_g10816	3	1.32e-268	88.82	1	F:GO:0003676	F:nucleic acid binding
g498.t1	KAF5354646.1hypothetical protein D9756_005351	3	1.72e-151	98.09	38	P:GO:0000122; P:GO:0000183; P:GO:0006338; P:GO:0006355; P:GO:0006476; P:GO:0009267; P:GO:0010621; P:GO:0022607; P:GO:0030466; P:GO:0031047; P:GO:0031508; P:GO:0031509; P:GO:0032211; P:GO:0034728; P:GO:0045815; P:GO:0045944; P:GO:0048869; P:GO:0065008; P:GO:0071103; P:GO:0071469; P:GO:1900239; P:GO:1900436; P:GO:1900445; P:GO:1900743; P:GO:1905268; F:GO:0003682; F:GO:0004407; F:GO:0005515; F:GO:00…	P:negative regulation of transcription by RNA polymerase II; P:rDNA heterochromatin formation; P:chromatin remodeling; P:regulation of DNA-templated transcription; P:protein deacetylation; P:cellular response to starvation; P:negative regulation of transcription by transcription factor localization; P:cellular component assembly; P:silent mating-type cassette heterochromatin formation; P:regulato…	EC:3.5.1.98	histone deacetylase
g499.t1	KAF5354646.1hypothetical protein D9756_005351	3	2.61e-36	81.81	36	P:GO:0000122; P:GO:0000183; P:GO:0006325; P:GO:0006476; P:GO:0009267; P:GO:0010621; P:GO:0022607; P:GO:0030466; P:GO:0031047; P:GO:0031508; P:GO:0031509; P:GO:0032211; P:GO:0034728; P:GO:0045815; P:GO:0045944; P:GO:0048869; P:GO:0065008; P:GO:0071103; P:GO:0071469; P:GO:1900239; P:GO:1900436; P:GO:1900445; P:GO:1900743; P:GO:1905268; F:GO:0003682; F:GO:0005515; F:GO:0016787; F:GO:0031078; C:GO:00…	P:negative regulation of transcription by RNA polymerase II; P:rDNA heterochromatin formation; P:chromatin organization; P:protein deacetylation; P:cellular response to starvation; P:negative regulation of transcription by transcription factor localization; P:cellular component assembly; P:silent mating-type cassette heterochromatin formation; P:regulatory ncRNA-mediated gene silencing; P:pericen…	EC:3.5.1.98	histone deacetylase
g500.t1	KAF5354645.1hypothetical protein D9756_005352	3	0	84.9	4	F:GO:0016810; C:GO:0016020	F:hydrolase activity, acting on carbon-nitrogen (but not peptide) bonds; C:membrane	EC:3.5	Acting on carbon-nitrogen bonds, other than peptide bonds
g501.t1	KAJ3568393.1hypothetical protein NP233_g5742	3	0	72.81	1	F:GO:0016787	F:hydrolase activity	EC:3	Hydrolases
g502.t1	KAF5354649.1hypothetical protein D9756_005356	3	3.23e-246	80.29	1	P:GO:0015693	P:magnesium ion transport
g503.t1	KAF5354653.1hypothetical protein D9756_005358	3	1.48e-163	70.8
g504.t1	KAF5354652.1hypothetical protein D9756_005359	3	0	82.79	6	P:GO:0006559; F:GO:0016841; C:GO:0005737	P:L-phenylalanine catabolic process; F:ammonia-lyase activity; C:cytoplasm	EC:4.3.1	Carbon-nitrogen lyases
g505.t1	KXN89391.1ATP-dependent RNA helicase dbp9	3	0	82.57	15	P:GO:0000463; P:GO:0010501; P:GO:0032508; F:GO:0003678; F:GO:0003723; F:GO:0003724; F:GO:0003729; F:GO:0004386; F:GO:0005524; F:GO:0016787; F:GO:0016887; F:GO:0033677; C:GO:0005730; C:GO:0005737	P:maturation of LSU-rRNA from tricistronic rRNA transcript (SSU-rRNA, 5.8S rRNA, LSU-rRNA); P:RNA secondary structure unwinding; P:DNA duplex unwinding; F:DNA helicase activity; F:RNA binding; F:RNA helicase activity; F:mRNA binding; F:helicase activity; F:ATP binding; F:hydrolase activity; F:ATP hydrolysis activity; F:DNA/RNA helicase activity; C:nucleolus; C:cytoplasm	EC:3.6.4.13; EC:3.6.1.15	RNA helicase; nucleoside-triphosphate phosphatase
g506.t1	KAF5361783.1hypothetical protein D9756_002539	3	3.07e-148	60.11	2	F:GO:0004672; F:GO:0005524	F:protein kinase activity; F:ATP binding
g507.t1	KAJ3563795.1hypothetical protein NP233_g8710	3	8.51e-183	94.28	7	P:GO:0048250; P:GO:0055080; P:GO:0065008; P:GO:0098771; F:GO:0005381; C:GO:0005743; C:GO:0016020	P:iron import into the mitochondrion; P:monoatomic cation homeostasis; P:regulation of biological quality; P:inorganic ion homeostasis; F:iron ion transmembrane transporter activity; C:mitochondrial inner membrane; C:membrane
g508.t1	KAF5361784.1hypothetical protein D9756_002536	3	5.52e-45	92.48
g509.t1	KAJ3563794.1hypothetical protein NP233_g8712	3	7.92e-119	87.94	12	P:GO:0006166; P:GO:0032263; P:GO:0032264; P:GO:0032265; P:GO:0046100; P:GO:1901070; F:GO:0000310; F:GO:0004422; F:GO:0016757; F:GO:0052657; C:GO:0005634; C:GO:0005737	P:purine ribonucleoside salvage; P:GMP salvage; P:IMP salvage; P:XMP salvage; P:hypoxanthine metabolic process; P:guanosine-containing compound biosynthetic process; F:xanthine phosphoribosyltransferase activity; F:hypoxanthine phosphoribosyltransferase activity; F:glycosyltransferase activity; F:guanine phosphoribosyltransferase activity; C:nucleus; C:cytoplasm	EC:2.4.2.8; EC:2.4.2.22	hypoxanthine phosphoribosyltransferase; xanthine phosphoribosyltransferase
g510.t1	KAF5361786.1hypothetical protein D9756_002534	3	7.34e-177	77.07	4	P:GO:0006383; F:GO:0003677; C:GO:0005634; C:GO:0005666	P:transcription by RNA polymerase III; F:DNA binding; C:nucleus; C:RNA polymerase III complex
g511.t1	KAF5361789.1hypothetical protein D9756_002533	3	2.51e-259	85.13	1	F:GO:0005488	F:binding
g512.t1	KAF5358327.1hypothetical protein D9756_001792	3	0	88.82	13	P:GO:0002181; P:GO:0006438; P:GO:0019752; P:GO:0061475; P:GO:0106074; F:GO:0002161; F:GO:0004832; F:GO:0005524; C:GO:0005739	P:cytoplasmic translation; P:valyl-tRNA aminoacylation; P:carboxylic acid metabolic process; P:cytosolic valyl-tRNA aminoacylation; P:aminoacyl-tRNA metabolism involved in translational fidelity; F:aminoacyl-tRNA editing activity; F:valine-tRNA ligase activity; F:ATP binding; C:mitochondrion	EC:6.1.1.9; EC:3.1.1	valine--tRNA ligase; Acting on ester bonds
g513.t1	KXN89389.1hypothetical protein AN958_05762	3	0	74.82	2	P:GO:0006355; F:GO:0005488	P:regulation of DNA-templated transcription; F:binding
g514.t1	KAJ3576108.1hypothetical protein NP233_g672	3	0	71.27	4	P:GO:0015074; F:GO:0003676; F:GO:0003723; C:GO:0005634	P:DNA integration; F:nucleic acid binding; F:RNA binding; C:nucleus
g515.t1	KAF5383866.1hypothetical protein D9615_003636	2	1.42e-19	61.85	3	F:GO:0003676; F:GO:0008270; C:GO:0005634	F:nucleic acid binding; F:zinc ion binding; C:nucleus
g516.t1	KAF7763868.1hypothetical protein Agabi119p4_8405	3	7.23e-161	70.8	4	P:GO:0015074; F:GO:0003676; F:GO:0003723; C:GO:0005634	P:DNA integration; F:nucleic acid binding; F:RNA binding; C:nucleus
g517.t1	KAF5364364.1hypothetical protein D9756_000796	3	4.28e-285	70.43	15	P:GO:0009303; P:GO:0009653; P:GO:0010628; P:GO:0010629; P:GO:0010688; P:GO:0030154; P:GO:0060963; F:GO:0000981; F:GO:0001046; F:GO:0001222; F:GO:0001223; F:GO:1901363; C:GO:0000228; C:GO:0000785; C:GO:0005730	P:rRNA transcription; P:anatomical structure morphogenesis; P:positive regulation of gene expression; P:negative regulation of gene expression; P:negative regulation of ribosomal protein gene transcription by RNA polymerase II; P:cell differentiation; P:positive regulation of ribosomal protein gene transcription by RNA polymerase II; F:DNA-binding transcription factor activity, RNA polymerase II-…
g518.t1	KXN87936.1Mitochondrial fission process protein 1	3	1.07e-74	66.4
g519.t1	KXN87937.1putative translation initiation factor eIF-2B subunit delta	3	2.77e-138	88.14	12	P:GO:0002183; P:GO:0006446; P:GO:0050790; P:GO:1901566; F:GO:0003723; F:GO:0003743; F:GO:0005085; F:GO:0051020; F:GO:1901363; C:GO:0005829; C:GO:0005851; C:GO:0032045	P:cytoplasmic translational initiation; P:regulation of translational initiation; P:regulation of catalytic activity; P:organonitrogen compound biosynthetic process; F:RNA binding; F:translation initiation factor activity; F:guanyl-nucleotide exchange factor activity; F:GTPase binding; F:heterocyclic compound binding; C:cytosol; C:eukaryotic translation initiation factor 2B complex; C:guanyl-nucl…
g520.t1	KAF5364369.1hypothetical protein D9756_000793	3	0	88.22	27	P:GO:0000122; P:GO:0000448; P:GO:0001933; P:GO:0006310; P:GO:0006353; P:GO:0006397; P:GO:0030846; P:GO:0030847; P:GO:0034244; P:GO:0034428; P:GO:0043144; P:GO:0071028; P:GO:0071035; F:GO:0000150; F:GO:0003676; F:GO:0003729; F:GO:0004534; F:GO:0008017; F:GO:0008270; F:GO:1901363; C:GO:0005634; C:GO:0005739; C:GO:0090730	P:negative regulation of transcription by RNA polymerase II; P:cleavage in ITS2 between 5.8S rRNA and LSU-rRNA of tricistronic rRNA transcript (SSU-rRNA, 5.8S rRNA, LSU-rRNA); P:negative regulation of protein phosphorylation; P:DNA recombination; P:DNA-templated transcription termination; P:mRNA processing; P:termination of RNA polymerase II transcription, poly(A)-coupled; P:termination of RNA po…	EC:3.1.13; EC:3.1.15	Acting on ester bonds; Acting on ester bonds
g521.t1	KAF5364368.1hypothetical protein D9756_000792	3	7e-202	59.71	14	P:GO:0006886; P:GO:0006888; P:GO:0006890; P:GO:0015833; P:GO:0048279; P:GO:0048280; F:GO:0000149; F:GO:0005484; C:GO:0005789; C:GO:0005794; C:GO:0012507; C:GO:0030660; C:GO:0031201; C:GO:0110165	P:intracellular protein transport; P:endoplasmic reticulum to Golgi vesicle-mediated transport; P:retrograde vesicle-mediated transport, Golgi to endoplasmic reticulum; P:peptide transport; P:vesicle fusion with endoplasmic reticulum; P:vesicle fusion with Golgi apparatus; F:SNARE binding; F:SNAP receptor activity; C:endoplasmic reticulum membrane; C:Golgi apparatus; C:ER to Golgi transport vesic…
g522.t1	KAF5364366.1hypothetical protein D9756_000790	3	5.86e-116	90.74	4	P:GO:0046521; P:GO:0097164; C:GO:0005789; C:GO:0016020	P:sphingoid catabolic process; P:ammonium ion metabolic process; C:endoplasmic reticulum membrane; C:membrane
g523.t1	KAF5363802.1hypothetical protein D9756_000789	3	1.25e-147	83.65
g524.t1	KXN87947.1Cell division cycle-related protein res2/pct1, partial	3	0	88.16	14	P:GO:0000082; P:GO:0010628; P:GO:0045944; F:GO:0001228; F:GO:0003677; F:GO:0043565; F:GO:1901363; C:GO:0000228; C:GO:0000785; C:GO:0005737; C:GO:0030907; C:GO:0090575	P:G1/S transition of mitotic cell cycle; P:positive regulation of gene expression; P:positive regulation of transcription by RNA polymerase II; F:DNA-binding transcription activator activity, RNA polymerase II-specific; F:DNA binding; F:sequence-specific DNA binding; F:heterocyclic compound binding; C:nuclear chromosome; C:chromatin; C:cytoplasm; C:MBF transcription complex; C:RNA polymerase II t…
g525.t1	KAF5363798.1hypothetical protein D9756_000783	3	8.59e-85	87.05
g526.t1	KAF5355842.1hypothetical protein D9756_004128	3	4.43e-290	82.43	12	P:GO:0006325; P:GO:0018393; P:GO:0051123; P:GO:0051276; F:GO:0003682; F:GO:0005198; F:GO:0043130; F:GO:0060090; C:GO:0000124; C:GO:0005634; C:GO:0005669; C:GO:0046695	P:chromatin organization; P:internal peptidyl-lysine acetylation; P:RNA polymerase II preinitiation complex assembly; P:chromosome organization; F:chromatin binding; F:structural molecule activity; F:ubiquitin binding; F:molecular adaptor activity; C:SAGA complex; C:nucleus; C:transcription factor TFIID complex; C:SLIK (SAGA-like) complex
g527.t1	KAF5356184.1hypothetical protein D9756_004130	3	0	93.63	6	P:GO:0006826; F:GO:0000293; C:GO:0016020	P:iron ion transport; F:ferric-chelate reductase activity; C:membrane	EC:1.16	Oxidizing metal ions
g528.t1	KAJ3572523.1hypothetical protein NP233_g3025	3	5.18e-176	60.89	2	F:GO:0004672; F:GO:0005524	F:protein kinase activity; F:ATP binding	EC:2.7.11.25	mitogen-activated protein kinase kinase kinase
g529.t1	KAF5355937.1hypothetical protein D9756_004133	3	0	80.67	14	P:GO:0000972; P:GO:0006606; P:GO:0006611; P:GO:0015833; P:GO:0017038; P:GO:0031503; P:GO:0036228; P:GO:0042254; P:GO:0051029; P:GO:0071166; P:GO:0097064; F:GO:0017056; C:GO:0005634; C:GO:0044611	P:transcription-dependent tethering of RNA polymerase II gene DNA at nuclear periphery; P:protein import into nucleus; P:protein export from nucleus; P:peptide transport; P:protein import; P:protein-containing complex localization; P:protein localization to nuclear inner membrane; P:ribosome biogenesis; P:rRNA transport; P:ribonucleoprotein complex localization; P:ncRNA export from nucleus; F:str…
g530.t1	KAF5356179.1hypothetical protein D9756_004138	3	1.37e-69	93	5	P:GO:0015031; P:GO:0031144; P:GO:0071630; C:GO:0005634; C:GO:0005737	P:protein transport; P:proteasome localization; P:nuclear protein quality control by the ubiquitin-proteasome system; C:nucleus; C:cytoplasm
g532.t1	KAF5347027.1hypothetical protein D9756_011014	3	5.52e-13	59.8	1	F:GO:0003824	F:catalytic activity
g533.t1	KAF7773493.1transcriptional regulator family: Zinc finger, CCHC-type	3	3.05e-169	65.73	1	F:GO:0005488	F:binding
g534.t1	KAF5358356.1hypothetical protein D9756_001895	3	1.8e-245	75.43
g535.t1	KAF5358355.1hypothetical protein D9756_001894	3	2.75e-215	82.3	8	P:GO:0090481; P:GO:0097624; P:GO:0098656; F:GO:0005459; F:GO:0015165; C:GO:0000139; C:GO:0098791	P:pyrimidine nucleotide-sugar transmembrane transport; P:UDP-galactose transmembrane import into Golgi lumen; P:monoatomic anion transmembrane transport; F:UDP-galactose transmembrane transporter activity; F:pyrimidine nucleotide-sugar transmembrane transporter activity; C:Golgi membrane; C:Golgi apparatus subcompartment
g536.t1	KAF5358354.1hypothetical protein D9756_001892	3	2.55e-157	86.36	6	P:GO:0000493; P:GO:0006364; F:GO:0051082; C:GO:0005654; C:GO:0005730; C:GO:0005829	P:box H/ACA snoRNP assembly; P:rRNA processing; F:unfolded protein binding; C:nucleoplasm; C:nucleolus; C:cytosol
g537.t1	KAJ3562176.1hypothetical protein NP233_g9742	3	0	97.13	5	P:GO:0000162; F:GO:0004049; C:GO:0005950	P:tryptophan biosynthetic process; F:anthranilate synthase activity; C:anthranilate synthase complex	EC:4.1.3.27	anthranilate synthase
g538.t1	KAF5358352.1hypothetical protein D9756_001890	3	0	85.79	5	P:GO:0098656; P:GO:1902358; F:GO:0008271; F:GO:0008509; C:GO:0016020	P:monoatomic anion transmembrane transport; P:sulfate transmembrane transport; F:secondary active sulfate transmembrane transporter activity; F:monoatomic anion transmembrane transporter activity; C:membrane
g539.t1	KAF5357935.1hypothetical protein D9756_001889	3	8.08e-165	85.93	7	P:GO:0032543; F:GO:0000049; F:GO:0003735; F:GO:1901363; C:GO:0005763; C:GO:0005840; C:GO:1990904	P:mitochondrial translation; F:tRNA binding; F:structural constituent of ribosome; F:heterocyclic compound binding; C:mitochondrial small ribosomal subunit; C:ribosome; C:ribonucleoprotein complex
g540.t1	KAJ3562968.1hypothetical protein NP233_g9245	3	0	93.34	10	P:GO:0006457; P:GO:0051083; P:GO:0061077; F:GO:0005524; F:GO:0016887; F:GO:0051082; F:GO:0140662; C:GO:0005829	P:protein folding; P:'de novo' cotranslational protein folding; P:chaperone-mediated protein folding; F:ATP binding; F:ATP hydrolysis activity; F:unfolded protein binding; F:ATP-dependent protein folding chaperone; C:cytosol	EC:3.6.1.15	nucleoside-triphosphate phosphatase
g541.t1	KXN82550.1hypothetical protein AN958_02401	3	2.93e-219	61.13	1	C:GO:0005634	C:nucleus
g542.t1	KAF9452235.1hypothetical protein P691DRAFT_805118	3	5.23e-60	84.91	4	P:GO:0007049; P:GO:0051301; C:GO:0000776; C:GO:0005634	P:cell cycle; P:cell division; C:kinetochore; C:nucleus
g543.t1	KAF5352453.1hypothetical protein D9756_005900	3	1.41e-245	87.41	4	P:GO:0008152; F:GO:0016798	P:metabolic process; F:hydrolase activity, acting on glycosyl bonds	EC:3.2	Glycosylases
g544.t1	KAJ3564546.1hypothetical protein NP233_g8227	3	1.65e-30	82	1	C:GO:0016020	C:membrane
g545.t1	KAF5352451.1hypothetical protein D9756_005902	3	0	85.3	15	P:GO:0000001; P:GO:0006997; P:GO:0015031; P:GO:0065008; P:GO:1990854; F:GO:0032266; F:GO:0035091; F:GO:0043168; C:GO:0000324; C:GO:0016020; C:GO:0071561; C:GO:0071944; C:GO:0098853	P:mitochondrion inheritance; P:nucleus organization; P:protein transport; P:regulation of biological quality; P:vacuole-ER tethering; F:phosphatidylinositol-3-phosphate binding; F:phosphatidylinositol binding; F:anion binding; C:fungal-type vacuole; C:membrane; C:nucleus-vacuole junction; C:cell periphery; C:endoplasmic reticulum-vacuole membrane contact site
g546.t1	KAJ3564543.1hypothetical protein NP233_g8225	3	1.49e-265	90.2	11	P:GO:0030488; F:GO:0000049; F:GO:0008757; F:GO:1901363; C:GO:0005634; C:GO:0005737; C:GO:0031515	P:tRNA methylation; F:tRNA binding; F:S-adenosylmethionine-dependent methyltransferase activity; F:heterocyclic compound binding; C:nucleus; C:cytoplasm; C:tRNA (m1A) methyltransferase complex	EC:2.1.1	Transferring one-carbon groups
g547.t1	KXN88845.1Myosin-1	3	0	72.54	29	P:GO:0000147; P:GO:0006898; P:GO:0009932; P:GO:0030838; P:GO:0032989; P:GO:0044855; P:GO:0048869; P:GO:0051127; P:GO:0051666; P:GO:0071963; F:GO:0000146; F:GO:0000166; F:GO:0005543; F:GO:0016887; F:GO:0043168; F:GO:0051015; C:GO:0001411; C:GO:0005628; C:GO:0005737; C:GO:0005826; C:GO:0015629; C:GO:0030428; C:GO:0030479; C:GO:0031097; C:GO:0043332; C:GO:0044853; C:GO:0045160; C:GO:0051285	P:actin cortical patch assembly; P:receptor-mediated endocytosis; P:cell tip growth; P:positive regulation of actin filament polymerization; P:cellular anatomical entity morphogenesis; P:plasma membrane raft distribution; P:cellular developmental process; P:positive regulation of actin nucleation; P:actin cortical patch localization; P:establishment or maintenance of cell polarity regulating cell…	EC:3.6.1.15; EC:5.6.1.8	nucleoside-triphosphate phosphatase; myosin ATPase
g548.t1	KAF5352450.1hypothetical protein D9756_005905	3	3.25e-163	52.74	3	P:GO:0006805; P:GO:0009231; F:GO:0004746	P:xenobiotic metabolic process; P:riboflavin biosynthetic process; F:riboflavin synthase activity	EC:2.5.1.9	riboflavin synthase
g549.t1	AHA86292.1aspartic protease 2	3	1.64e-277	93.37	4	P:GO:0006508; F:GO:0004190	P:proteolysis; F:aspartic-type endopeptidase activity	EC:3.4.23	Acting on peptide bonds (peptidases)
g550.t1	KAF9454182.1DUF89-domain-containing protein	3	3.83e-281	83.22	6	F:GO:0046872; F:GO:0097023; F:GO:0103026	F:metal ion binding; F:fructose 6-phosphate aldolase activity; F:fructose-1-phosphatase activity	EC:4.1.2; EC:3.1.3	Carbon-carbon lyases; Acting on ester bonds
g551.t1	KAG6898122.160S ribosomal protein L12	3	8.91e-104	97.17	10	P:GO:0000027; P:GO:0006412; F:GO:0003735; F:GO:0019843; F:GO:1901363; C:GO:0005840; C:GO:0022625; C:GO:1990904	P:ribosomal large subunit assembly; P:translation; F:structural constituent of ribosome; F:rRNA binding; F:heterocyclic compound binding; C:ribosome; C:cytosolic large ribosomal subunit; C:ribonucleoprotein complex
g552.t1	KAF5351658.1hypothetical protein D9756_007431	3	0	65.29	2	F:GO:0004672; F:GO:0005524	F:protein kinase activity; F:ATP binding
g553.t1	KAF5351659.1hypothetical protein D9756_007432	3	3.17e-45	60.66
g554.t1	KAJ3565904.1hypothetical protein NP233_g7338	3	2.46e-213	87.94	3	P:GO:0055085; F:GO:0022857; C:GO:0016020	P:transmembrane transport; F:transmembrane transporter activity; C:membrane
g555.t1	KAF5351954.1hypothetical protein D9756_007436	3	1.41e-180	94.06	31	P:GO:0000747; P:GO:0001403; P:GO:0006417; P:GO:0006446; P:GO:0007155; P:GO:0007186; P:GO:0010389; P:GO:0031954; P:GO:0032995; P:GO:0034198; P:GO:0036170; P:GO:0036178; P:GO:0036180; P:GO:0036244; P:GO:0044419; P:GO:0044703; P:GO:0050790; P:GO:0065008; P:GO:0080135; P:GO:0140469; P:GO:1902660; P:GO:2000766; P:GO:2001125; F:GO:0001965; F:GO:0005080; F:GO:0005092; F:GO:0043022; F:GO:0045182; C:GO:00…	P:conjugation with cellular fusion; P:invasive growth in response to glucose limitation; P:regulation of translation; P:regulation of translational initiation; P:cell adhesion; P:G protein-coupled receptor signaling pathway; P:regulation of G2/M transition of mitotic cell cycle; P:positive regulation of protein autophosphorylation; P:regulation of fungal-type cell wall biogenesis; P:cellular resp…
g556.t1	KAJ3565909.1hypothetical protein NP233_g7341	3	4.45e-127	77.21	11	P:GO:0006152; P:GO:0008152; P:GO:0008655; P:GO:0019358; P:GO:0034356; P:GO:0046135; F:GO:0008477; F:GO:0016787; F:GO:0045437; F:GO:0070635; F:GO:0070636	P:purine nucleoside catabolic process; P:metabolic process; P:pyrimidine-containing compound salvage; P:nicotinate nucleotide salvage; P:NAD biosynthesis via nicotinamide riboside salvage pathway; P:pyrimidine nucleoside catabolic process; F:purine nucleosidase activity; F:hydrolase activity; F:uridine nucleosidase activity; F:nicotinamide riboside hydrolase activity; F:nicotinic acid riboside hy…	EC:3.2.2.8; EC:3.2.2.1; EC:3.2.2.3	ribosylpyrimidine nucleosidase; purine nucleosidase; uridine nucleosidase
g557.t1	KAF7762698.1transcriptional regulator family: Zinc finger, CCHC-type	3	1.93e-45	64.23	3	F:GO:0003676; F:GO:0008270; C:GO:0005634	F:nucleic acid binding; F:zinc ion binding; C:nucleus
g558.t1	KAF5364155.1hypothetical protein D9756_000310	3	0	72.74	6	P:GO:0051480; P:GO:0051649; P:GO:0060402; P:GO:0098703; F:GO:0005262; C:GO:0016020	P:regulation of cytosolic calcium ion concentration; P:establishment of localization in cell; P:calcium ion transport into cytosol; P:calcium ion import across plasma membrane; F:calcium channel activity; C:membrane
g559.t1	KAF5364157.1hypothetical protein D9756_000312	3	0	75.76	1	C:GO:0005815	C:microtubule organizing center
g560.t1	KAF5364158.1hypothetical protein D9756_000313	3	7.39e-196	83.5
g561.t1	KAF5364159.1hypothetical protein D9756_000314	3	2.9e-197	86.51	18	P:GO:0001403; P:GO:0006338; P:GO:0006357; P:GO:0006366; P:GO:0007124; P:GO:0018393; P:GO:0051276; F:GO:0003677; F:GO:0003712; F:GO:0046982; F:GO:1901363; C:GO:0000124; C:GO:0000228; C:GO:0005634; C:GO:0005654; C:GO:0005829; C:GO:0046695	P:invasive growth in response to glucose limitation; P:chromatin remodeling; P:regulation of transcription by RNA polymerase II; P:transcription by RNA polymerase II; P:pseudohyphal growth; P:internal peptidyl-lysine acetylation; P:chromosome organization; F:DNA binding; F:transcription coregulator activity; F:protein heterodimerization activity; F:heterocyclic compound binding; C:SAGA complex; C…
g562.t1	KAF5364161.1hypothetical protein D9756_000316	3	3.73e-159	88.9	16	P:GO:0002790; P:GO:0006289; P:GO:0009306; P:GO:0017157; P:GO:0043161; P:GO:0044248; F:GO:0000149; F:GO:0003684; F:GO:0004190; F:GO:0031593; F:GO:0043130; C:GO:0005886	P:peptide secretion; P:nucleotide-excision repair; P:protein secretion; P:regulation of exocytosis; P:proteasome-mediated ubiquitin-dependent protein catabolic process; P:cellular catabolic process; F:SNARE binding; F:damaged DNA binding; F:aspartic-type endopeptidase activity; F:polyubiquitin modification-dependent protein binding; F:ubiquitin binding; C:plasma membrane	EC:3.4.23	Acting on peptide bonds (peptidases)
g563.t1	KXN89499.1Protein IMPACT	3	3.27e-161	79.71	18	P:GO:0006417; P:GO:0006469; P:GO:0034198; P:GO:0060992; P:GO:0070301; P:GO:0071236; P:GO:0071407; P:GO:0071417; P:GO:0071466; P:GO:0071468; P:GO:0097237; P:GO:1990497; F:GO:0003785; F:GO:0004860; F:GO:0043022; C:GO:0005634; C:GO:0005737	P:regulation of translation; P:negative regulation of protein kinase activity; P:cellular response to amino acid starvation; P:response to fungicide; P:cellular response to hydrogen peroxide; P:cellular response to antibiotic; P:cellular response to organic cyclic compound; P:cellular response to organonitrogen compound; P:cellular response to xenobiotic stimulus; P:cellular response to acidic pH…
g564.t1	KAF5364154.1hypothetical protein D9756_000319	3	9.81e-145	95.99	6	P:GO:0009450; F:GO:0004777; F:GO:0036243	P:gamma-aminobutyric acid catabolic process; F:succinate-semialdehyde dehydrogenase (NAD+) activity; F:succinate-semialdehyde dehydrogenase (NADP+) activity	EC:1.2.1.16; EC:1.2.1.24; EC:1.2.1.79	succinate-semialdehyde dehydrogenase [NAD(P)(+)]; succinate-semialdehyde dehydrogenase (NAD(+)); succinate-semialdehyde dehydrogenase (NADP(+))
g565.t1	KAF5363624.1hypothetical protein D9756_000322	3	2.02e-93	82.05	1	C:GO:0016020	C:membrane
g566.t1	KAF5363360.1hypothetical protein D9756_000877	3	2.12e-50	75.13	1	C:GO:0043227	C:membrane-bounded organelle
g569.t1	KAJ3560359.1hypothetical protein NP233_g10892	3	1.2e-185	76.82	1	F:GO:0003676	F:nucleic acid binding
g570.t1	KAJ3576108.1hypothetical protein NP233_g672	3	3.17e-40	65.16
g571.t1	KAF5360975.1hypothetical protein D9756_004486	3	1.16e-33	66.87	3	F:GO:0003676; F:GO:0008270; C:GO:0005634	F:nucleic acid binding; F:zinc ion binding; C:nucleus
g572.t1	KAF5357833.1hypothetical protein D9756_001807	3	0	90.81	6	P:GO:0030245; F:GO:0008422; F:GO:0102483	P:cellulose catabolic process; F:beta-glucosidase activity; F:scopolin beta-glucosidase activity	EC:3.2.1.21	beta-glucosidase
g573.t1	KAF5357835.1hypothetical protein D9756_001805	3	7.88e-244	90.96	30	P:GO:0006457; P:GO:0006458; P:GO:0006626; P:GO:0006839; P:GO:0006886; P:GO:0007005; P:GO:0009408; P:GO:0015833; P:GO:0032781; P:GO:0035719; P:GO:0036503; P:GO:0042026; P:GO:0043161; P:GO:0044248; P:GO:0045047; P:GO:0051345; P:GO:1900035; F:GO:0001671; F:GO:0005524; F:GO:0008047; F:GO:0030544; F:GO:0046872; F:GO:0051082; F:GO:0060589; C:GO:0048471; C:GO:0072380	P:protein folding; P:'de novo' protein folding; P:protein targeting to mitochondrion; P:mitochondrial transport; P:intracellular protein transport; P:mitochondrion organization; P:response to heat; P:peptide transport; P:positive regulation of ATP-dependent activity; P:tRNA import into nucleus; P:ERAD pathway; P:protein refolding; P:proteasome-mediated ubiquitin-dependent protein catabolic proces…
g574.t1	KAJ3567129.1hypothetical protein NP233_g6572	3	0	71.04	2	F:GO:0003824; F:GO:0016787	F:catalytic activity; F:hydrolase activity	EC:3.5.2.9	5-oxoprolinase (ATP-hydrolyzing)
g575.t1	KAF5357832.1hypothetical protein D9756_001801	3	1.13e-113	84.44	19	P:GO:0006207; P:GO:0006221; P:GO:0016310; P:GO:0046940; F:GO:0004017; F:GO:0004127; F:GO:0005524; F:GO:0033862; C:GO:0005634; C:GO:0005737	P:'de novo' pyrimidine nucleobase biosynthetic process; P:pyrimidine nucleotide biosynthetic process; P:phosphorylation; P:nucleoside monophosphate phosphorylation; F:adenylate kinase activity; F:cytidylate kinase activity; F:ATP binding; F:UMP kinase activity; C:nucleus; C:cytoplasm	EC:2.7.4.4; EC:2.7.4.3; EC:2.7.4.22; EC:2.7.4.14	nucleoside-phosphate kinase; adenylate kinase; UMP kinase; UMP/CMP kinase
g576.t1	KXN87729.1Nucleoporin Nup37	3	8.34e-202	86.24	1	C:GO:0031080	C:nuclear pore outer ring
g577.t1	KAF9451238.1hypothetical protein P691DRAFT_757517	3	0	85.28	4	P:GO:0006357; F:GO:0000981; F:GO:0003677; F:GO:0008270	P:regulation of transcription by RNA polymerase II; F:DNA-binding transcription factor activity, RNA polymerase II-specific; F:DNA binding; F:zinc ion binding
g578.t1	KAF5358157.1hypothetical protein D9756_001798	3	0	90.16	15	P:GO:0000350; P:GO:0000398; P:GO:0006357; P:GO:0030154; P:GO:0045292; F:GO:0000976; F:GO:0000981; F:GO:0003677; F:GO:1901363; C:GO:0000974; C:GO:0005681; C:GO:0005829; C:GO:0071006; C:GO:0071014	P:generation of catalytic spliceosome for second transesterification step; P:mRNA splicing, via spliceosome; P:regulation of transcription by RNA polymerase II; P:cell differentiation; P:mRNA cis splicing, via spliceosome; F:transcription cis-regulatory region binding; F:DNA-binding transcription factor activity, RNA polymerase II-specific; F:DNA binding; F:heterocyclic compound binding; C:Prp19 …
g579.t1	KAJ3564925.1hypothetical protein NP233_g7972	3	5.91e-192	74.44	12	P:GO:0045292; F:GO:0003676; F:GO:0003723; F:GO:0003724; F:GO:0004386; F:GO:0005524; F:GO:0016787; F:GO:0016887; C:GO:0005681; C:GO:0005737; C:GO:1990904	P:mRNA cis splicing, via spliceosome; F:nucleic acid binding; F:RNA binding; F:RNA helicase activity; F:helicase activity; F:ATP binding; F:hydrolase activity; F:ATP hydrolysis activity; C:spliceosomal complex; C:cytoplasm; C:ribonucleoprotein complex	EC:3.6.4.13; EC:3.6.1.15	RNA helicase; nucleoside-triphosphate phosphatase
g581.t1	KAF5354738.1hypothetical protein D9756_005528	3	8.96e-82	86.63	6	P:GO:0001522; F:GO:0003723; F:GO:0009982	P:pseudouridine synthesis; F:RNA binding; F:pseudouridine synthase activity	EC:5.4	Intramolecular transferases
g582.t1	KAF5354906.1hypothetical protein D9756_005521	3	6.31e-233	89	2	P:GO:0033609; F:GO:0046872	P:oxalate metabolic process; F:metal ion binding
g583.t1	KAJ3573236.1hypothetical protein NP233_g2571	3	2.87e-146	61.66
g584.t1	KAF7782764.1hypothetical protein Agabi119p4_2140	3	0	75.27	11	P:GO:0002926; P:GO:0006357; P:GO:0008033; P:GO:0140018; P:GO:2000765; F:GO:0000049; F:GO:1901363; C:GO:0005622; C:GO:0005634; C:GO:0005737; C:GO:0033588	P:tRNA wobble base 5-methoxycarbonylmethyl-2-thiouridinylation; P:regulation of transcription by RNA polymerase II; P:tRNA processing; P:regulation of cytoplasmic translational fidelity; P:regulation of cytoplasmic translation; F:tRNA binding; F:heterocyclic compound binding; C:intracellular anatomical structure; C:nucleus; C:cytoplasm; C:elongator holoenzyme complex
g585.t1	KAF5354975.1hypothetical protein D9756_005534	3	0	82.95	19	P:GO:0016236; P:GO:0051480; P:GO:0051649; P:GO:0060402; P:GO:0061454; P:GO:0071421; F:GO:0005388; F:GO:0005509; F:GO:0005524; F:GO:0015410; F:GO:0016887; F:GO:0042625; C:GO:0000139; C:GO:0005789; C:GO:0005886; C:GO:0016020; C:GO:0098791	P:macroautophagy; P:regulation of cytosolic calcium ion concentration; P:establishment of localization in cell; P:calcium ion transport into cytosol; P:release of sequestered calcium ion into cytosol by Golgi; P:manganese ion transmembrane transport; F:P-type calcium transporter activity; F:calcium ion binding; F:ATP binding; F:ABC-type manganese transporter activity; F:ATP hydrolysis activity; F…	EC:7.2.2.10; EC:3.6.1.15; EC:7.2.2.5	P-type Ca(2+) transporter; nucleoside-triphosphate phosphatase; ABC-type Mn(2+) transporter
g587.t1	KAF7776539.1hypothetical protein Agabi119p4_4932	3	1.16e-62	79.53	4	P:GO:0015074; F:GO:0003676; F:GO:0003723; C:GO:0005634	P:DNA integration; F:nucleic acid binding; F:RNA binding; C:nucleus
g588.t1	KAF5360975.1hypothetical protein D9756_004486	3	1.65e-50	63.65	1	F:GO:0005488	F:binding
g589.t1	KAF5360425.1hypothetical protein D9756_004564	3	4.28e-112	77.91	1	C:GO:0016020	C:membrane
g590.t1	KAJ3562259.1hypothetical protein NP233_g9687	3	4.68e-110	77.96	12	P:GO:0000027; P:GO:0002181; P:GO:0006412; F:GO:0003735; F:GO:0019843; F:GO:1901363; C:GO:0005840; C:GO:0022625; C:GO:0030687; C:GO:1990904	P:ribosomal large subunit assembly; P:cytoplasmic translation; P:translation; F:structural constituent of ribosome; F:rRNA binding; F:heterocyclic compound binding; C:ribosome; C:cytosolic large ribosomal subunit; C:preribosome, large subunit precursor; C:ribonucleoprotein complex
g591.t1	KAF5347016.1hypothetical protein D9756_010998	3	0	85.71	15	P:GO:0000472; P:GO:0000480; P:GO:0022618; P:GO:0042254; P:GO:0042255; F:GO:0003729; F:GO:0003924; F:GO:0005525; F:GO:0032550; F:GO:0034511; C:GO:0005634; C:GO:0005730; C:GO:0005739; C:GO:0030686	P:endonucleolytic cleavage to generate mature 5'-end of SSU-rRNA from (SSU-rRNA, 5.8S rRNA, LSU-rRNA); P:endonucleolytic cleavage in 5'-ETS of tricistronic rRNA transcript (SSU-rRNA, 5.8S rRNA, LSU-rRNA); P:protein-RNA complex assembly; P:ribosome biogenesis; P:ribosome assembly; F:mRNA binding; F:GTPase activity; F:GTP binding; F:purine ribonucleoside binding; F:U3 snoRNA binding; C:nucleus; C:n…	EC:3.6.1.15	nucleoside-triphosphate phosphatase
g592.t1	KAF5360826.1hypothetical protein D9756_004573	3	0	95.2	12	P:GO:0006099; P:GO:0006101; P:GO:0006103; P:GO:0006805; P:GO:0016999; F:GO:0004591; F:GO:0030976; C:GO:0009353; C:GO:0042645	P:tricarboxylic acid cycle; P:citrate metabolic process; P:2-oxoglutarate metabolic process; P:xenobiotic metabolic process; P:antibiotic metabolic process; F:oxoglutarate dehydrogenase (succinyl-transferring) activity; F:thiamine pyrophosphate binding; C:obsolete mitochondrial oxoglutarate dehydrogenase complex; C:mitochondrial nucleoid	EC:1.2.4.2	oxoglutarate dehydrogenase (succinyl-transferring)
g593.t1	KXN84603.1hypothetical protein AN958_12284	3	4.44e-165	72.11	1	C:GO:0016020	C:membrane
g594.t1	KAF5349213.1hypothetical protein D9756_009505	3	0	82.8	20	P:GO:0006396; P:GO:0030422; P:GO:0035194; P:GO:0040029; P:GO:0071359; F:GO:0003677; F:GO:0003723; F:GO:0004386; F:GO:0004525; F:GO:0005524; F:GO:0046872; C:GO:0005634; C:GO:0005737; C:GO:0016442	P:RNA processing; P:siRNA processing; P:regulatory ncRNA-mediated post-transcriptional gene silencing; P:epigenetic regulation of gene expression; P:cellular response to dsRNA; F:DNA binding; F:RNA binding; F:helicase activity; F:ribonuclease III activity; F:ATP binding; F:metal ion binding; C:nucleus; C:cytoplasm; C:RISC complex	EC:3.1.30; EC:3.1.26.3	Acting on ester bonds; ribonuclease III
g595.t1	KAJ3576376.1hypothetical protein NP233_g467	3	2e-214	80.34	6	P:GO:0006508; F:GO:0004252; C:GO:0110165	P:proteolysis; F:serine-type endopeptidase activity; C:cellular anatomical entity	EC:3.4.21	Acting on peptide bonds (peptidases)
g596.t1	KAF5344814.1hypothetical protein D9756_011089	3	2.36e-31	81.45	1	C:GO:0016020	C:membrane
g597.t1	KAJ3576386.1hypothetical protein NP233_g483	3	6.94e-10	68.1
g598.t1	KXN86821.1hypothetical protein AN958_09557	3	2.1e-203	72.91	3	P:GO:0055085; F:GO:0022857; C:GO:0016020	P:transmembrane transport; F:transmembrane transporter activity; C:membrane
g599.t1	KAF9445151.1hypothetical protein P691DRAFT_710809	3	1.16e-99	92.06	1	C:GO:0016020	C:membrane
g600.t1	KAJ3576368.1hypothetical protein NP233_g458	3	0	85.01	10	F:GO:0004497; F:GO:0005506; F:GO:0016705; F:GO:0020037; C:GO:0016020	F:monooxygenase activity; F:iron ion binding; F:oxidoreductase activity, acting on paired donors, with incorporation or reduction of molecular oxygen; F:heme binding; C:membrane	EC:1.14	Acting on paired donors, with incorporation or reduction of molecular oxygen. The oxygen incorporated need not be derived from O2
g601.t1	KAJ3576108.1hypothetical protein NP233_g672	3	3.87e-129	63.84	1	F:GO:0005488	F:binding
g603.t1	KAF5353308.1hypothetical protein D9756_007968	3	1.27e-177	90.08	1	C:GO:0016020	C:membrane
g604.t1	KAF5353311.1hypothetical protein D9756_007964	3	0	82.04	2	F:GO:0016491; F:GO:0046872	F:oxidoreductase activity; F:metal ion binding	EC:1	Oxidoreductases
g605.t1	KAF5353313.1hypothetical protein D9756_007963	3	0	79.11	5	P:GO:0006384; P:GO:0042791; C:GO:0000127; C:GO:0005634; C:GO:0005737	P:transcription initiation at RNA polymerase III promoter; P:5S class rRNA transcription by RNA polymerase III; C:transcription factor TFIIIC complex; C:nucleus; C:cytoplasm
g606.t1	KAF9450760.1hypothetical protein P691DRAFT_664722	3	9.02e-115	74.74
g607.t1	CDJ79840.1elongation factor 1-beta	3	6.76e-127	85.86	14	P:GO:0002182; P:GO:0006414; P:GO:0006449; P:GO:0032232; P:GO:0065009; P:GO:1990145; F:GO:0003723; F:GO:0003746; F:GO:0005085; F:GO:0051020; F:GO:1901363; C:GO:0005853	P:cytoplasmic translational elongation; P:translational elongation; P:regulation of translational termination; P:negative regulation of actin filament bundle assembly; P:regulation of molecular function; P:maintenance of translational fidelity; F:RNA binding; F:translation elongation factor activity; F:guanyl-nucleotide exchange factor activity; F:GTPase binding; F:heterocyclic compound binding; …
g608.t1	KAJ3573667.1hypothetical protein NP233_g2289	3	2.57e-65	82.77	2	F:GO:0016829; C:GO:0016020	F:lyase activity; C:membrane
g609.t1	KAF5356205.1hypothetical protein D9756_004115	3	8.82e-87	86.48	1	C:GO:0016020	C:membrane
g610.t1	KXN83863.1Integral inner nuclear membrane protein ima1	3	5.1e-11	60.24	6	P:GO:0071765; C:GO:0005637; C:GO:0034506; C:GO:0034992; C:GO:0044732; C:GO:0110165	P:nuclear inner membrane organization; C:nuclear inner membrane; C:chromosome, centromeric core domain; C:microtubule organizing center attachment site; C:mitotic spindle pole body; C:cellular anatomical entity
g611.t1	KAJ3573673.1hypothetical protein NP233_g2293	3	8.8e-164	86.18	44	P:GO:0000709; P:GO:0000722; P:GO:0000724; P:GO:0000730; P:GO:0007131; P:GO:0007533; P:GO:0010212; P:GO:0030491; P:GO:0031508; P:GO:0036297; P:GO:0042148; P:GO:0045165; P:GO:0045892; P:GO:0051260; P:GO:0060249; P:GO:0061806; P:GO:0065008; P:GO:0070192; P:GO:0110027; P:GO:1990426; P:GO:1990918; F:GO:0000150; F:GO:0000400; F:GO:0003689; F:GO:0003690; F:GO:0003697; F:GO:0005524; F:GO:0016887; F:GO:00…	P:meiotic joint molecule formation; P:telomere maintenance via recombination; P:double-strand break repair via homologous recombination; P:DNA recombinase assembly; P:reciprocal meiotic recombination; P:mating type switching; P:response to ionizing radiation; P:heteroduplex formation; P:pericentric heterochromatin formation; P:interstrand cross-link repair; P:DNA strand invasion; P:cell fate comm…	EC:3.6.1.15	nucleoside-triphosphate phosphatase
g612.t1	KAJ3573676.1hypothetical protein NP233_g2294	3	3.1e-278	91.35	6	P:GO:0006520; P:GO:0006564; F:GO:0004617; F:GO:0016616; F:GO:0051287	P:amino acid metabolic process; P:L-serine biosynthetic process; F:phosphoglycerate dehydrogenase activity; F:oxidoreductase activity, acting on the CH-OH group of donors, NAD or NADP as acceptor; F:NAD binding	EC:1.1.1.95	phosphoglycerate dehydrogenase
g613.t1	KAF5355849.1hypothetical protein D9756_004120	3	1.76e-138	91.29	16	P:GO:0000105; P:GO:0006541; P:GO:0018130; P:GO:0019438; P:GO:0052803; P:GO:1901362; P:GO:1901607; F:GO:0000107; F:GO:0004359; F:GO:0016833; C:GO:0005622	P:histidine biosynthetic process; P:glutamine metabolic process; P:heterocycle biosynthetic process; P:aromatic compound biosynthetic process; P:imidazole-containing compound metabolic process; P:organic cyclic compound biosynthetic process; P:alpha-amino acid biosynthetic process; F:imidazoleglycerol-phosphate synthase activity; F:glutaminase activity; F:oxo-acid-lyase activity; C:intracellular …	EC:3.5.1.2; EC:2.4.2; EC:4.1.3	glutaminase; Glycosyltransferases; Carbon-carbon lyases
g614.t1	KAF5355848.1hypothetical protein D9756_004121	3	6.85e-149	74.85
g615.t1	KAF5355847.1hypothetical protein D9756_004122	3	7.01e-293	83.48	8	P:GO:0006665; P:GO:0006679; P:GO:0007009; P:GO:0044419; F:GO:0016491; F:GO:0016705; C:GO:0016020	P:sphingolipid metabolic process; P:glucosylceramide biosynthetic process; P:plasma membrane organization; P:biological process involved in interspecies interaction between organisms; F:oxidoreductase activity; F:oxidoreductase activity, acting on paired donors, with incorporation or reduction of molecular oxygen; C:membrane	EC:1.14	Acting on paired donors, with incorporation or reduction of molecular oxygen. The oxygen incorporated need not be derived from O2
g616.t1	KAF5355846.1hypothetical protein D9756_004123	3	2.98e-114	90.71	10	P:GO:0002181; P:GO:0006412; F:GO:0003723; F:GO:0003735; F:GO:1901363; C:GO:0005840; C:GO:0009986; C:GO:0022625; C:GO:1990904	P:cytoplasmic translation; P:translation; F:RNA binding; F:structural constituent of ribosome; F:heterocyclic compound binding; C:ribosome; C:cell surface; C:cytosolic large ribosomal subunit; C:ribonucleoprotein complex
g617.t1	KAJ3572531.1hypothetical protein NP233_g3018	3	6.48e-257	88	6	P:GO:0009086; F:GO:0003871; F:GO:0008270	P:methionine biosynthetic process; F:5-methyltetrahydropteroyltriglutamate-homocysteine S-methyltransferase activity; F:zinc ion binding	EC:2.1.1.14	5-methyltetrahydropteroyltriglutamate--homocysteine S-methyltransferase
g618.t1	KAJ3575602.1hypothetical protein NP233_g987	3	5.96e-239	85.64	11	P:GO:0006591; P:GO:0010121; P:GO:0055129; F:GO:0004587; F:GO:0030170; F:GO:0042802; C:GO:0005634; C:GO:0005829	P:ornithine metabolic process; P:arginine catabolic process to proline via ornithine; P:L-proline biosynthetic process; F:ornithine aminotransferase activity; F:pyridoxal phosphate binding; F:identical protein binding; C:nucleus; C:cytosol	EC:2.6.1.13	ornithine aminotransferase
g619.t1	KAF5353374.1hypothetical protein D9756_008040	3	0	84.41	10	P:GO:0006656; P:GO:0032259; P:GO:0097164; F:GO:0004608; C:GO:0005789; C:GO:0071944	P:phosphatidylcholine biosynthetic process; P:methylation; P:ammonium ion metabolic process; F:phosphatidylethanolamine N-methyltransferase activity; C:endoplasmic reticulum membrane; C:cell periphery	EC:2.1.1.17	phosphatidylethanolamine N-methyltransferase
g620.t1	KXN92533.1hypothetical protein AN958_05388	3	9.56e-286	67.57
g621.t1	KAF5350539.1hypothetical protein D9756_008517	3	2.02e-58	74.17	2	F:GO:0008233	F:peptidase activity	EC:3.4	Acting on peptide bonds (peptidases)
g622.t1	KAF5350694.1hypothetical protein D9756_008508	3	0	88.65	13	F:GO:0003774; F:GO:0003779; F:GO:0004100; F:GO:0005524; C:GO:0005886; C:GO:0016020; C:GO:0016459; C:GO:0030659	F:cytoskeletal motor activity; F:actin binding; F:chitin synthase activity; F:ATP binding; C:plasma membrane; C:membrane; C:myosin complex; C:cytoplasmic vesicle membrane	EC:2.4.1.16	chitin synthase
g623.t1	KAJ3567233.1hypothetical protein NP233_g6502	3	0	79.44	10	P:GO:0055085; F:GO:0005524; F:GO:0016887; F:GO:0140359; C:GO:0016020	P:transmembrane transport; F:ATP binding; F:ATP hydrolysis activity; F:ABC-type transporter activity; C:membrane	EC:7.2.2; EC:3.6.1.15	Catalysing the translocation of inorganic cations; nucleoside-triphosphate phosphatase
g624.t1	KAF5350502.1hypothetical protein D9756_008499	3	1.69e-166	79.59	1	F:GO:0016787	F:hydrolase activity
g625.t1	KAF5350503.1hypothetical protein D9756_008498	3	3.96e-77	79.23
g626.t1	KAJ3562816.1hypothetical protein NP233_g9340	3	0	92.74	4	P:GO:0005975; F:GO:0004553	P:carbohydrate metabolic process; F:hydrolase activity, hydrolyzing O-glycosyl compounds	EC:3.2.1	Glycosylases
g627.t1	KAJ3560359.1hypothetical protein NP233_g10892	3	1.25e-86	86.91
g629.t1	KAF5363464.1hypothetical protein D9756_000178	3	4.51e-51	50.41
g630.t1	KAJ3561575.1hypothetical protein NP233_g10112	3	4.16e-66	92.22	10	P:GO:0006457; P:GO:0007021; F:GO:0015631; F:GO:0044183; F:GO:0051082; C:GO:0005737; C:GO:0016272	P:protein folding; P:tubulin complex assembly; F:tubulin binding; F:protein folding chaperone; F:unfolded protein binding; C:cytoplasm; C:prefoldin complex
g631.t1	KAJ3560359.1hypothetical protein NP233_g10892	3	1.05e-229	71.72	4	P:GO:0015074; F:GO:0003676; F:GO:0003723; C:GO:0005634	P:DNA integration; F:nucleic acid binding; F:RNA binding; C:nucleus
g632.t1	KAF7770962.1hypothetical protein Agabi119p4_6936	3	3.23e-170	89.42	3	P:GO:0015074; F:GO:0003723; C:GO:0005634	P:DNA integration; F:RNA binding; C:nucleus
g634.t1	KAF5351959.1hypothetical protein D9756_007569	3	1.75e-44	65.84	12	P:GO:0010628; P:GO:0010629; P:GO:0015976; P:GO:0045722; P:GO:0061414; P:GO:0061415; F:GO:0000977; F:GO:0001227; F:GO:0005488; F:GO:1901363; C:GO:0005634; C:GO:0005737	P:positive regulation of gene expression; P:negative regulation of gene expression; P:carbon utilization; P:positive regulation of gluconeogenesis; P:positive regulation of transcription from RNA polymerase II promoter by a nonfermentable carbon source; P:negative regulation of transcription from RNA polymerase II promoter by a nonfermentable carbon source; F:RNA polymerase II transcription regul…
g635.t1	KAF5351867.1hypothetical protein D9756_007570	3	1.08e-156	84.77	8	P:GO:0019538; P:GO:0032259; F:GO:0008276; F:GO:0008757	P:protein metabolic process; P:methylation; F:protein methyltransferase activity; F:S-adenosylmethionine-dependent methyltransferase activity	EC:2.1.1	Transferring one-carbon groups
g636.t1	KAJ3567588.1hypothetical protein NP233_g6275	3	4.64e-221	74.17
g637.t1	PPR05855.1hypothetical protein CVT26_010135	3	1.74e-307	65.42	13	P:GO:0000050; P:GO:0000256; P:GO:0006144; P:GO:0042178; P:GO:0044270; F:GO:0004037; F:GO:0004848; F:GO:0050385	P:urea cycle; P:allantoin catabolic process; P:purine nucleobase metabolic process; P:xenobiotic catabolic process; P:cellular nitrogen compound catabolic process; F:allantoicase activity; F:ureidoglycolate hydrolase activity; F:ureidoglycolate lyase activity	EC:3.5.1.116; EC:4.3.2.3; EC:3.5.3.4	ureidoglycolate amidohydrolase; ureidoglycolate lyase; allantoicase
g638.t1	KAF5351868.1hypothetical protein D9756_007573	3	3.76e-179	87.03	10	P:GO:0000462; P:GO:0006412; P:GO:0032543; F:GO:0003723; F:GO:0003735; F:GO:1901363; C:GO:0005763; C:GO:0005840; C:GO:1990904	P:maturation of SSU-rRNA from tricistronic rRNA transcript (SSU-rRNA, 5.8S rRNA, LSU-rRNA); P:translation; P:mitochondrial translation; F:RNA binding; F:structural constituent of ribosome; F:heterocyclic compound binding; C:mitochondrial small ribosomal subunit; C:ribosome; C:ribonucleoprotein complex
g639.t1	KAJ3567586.1hypothetical protein NP233_g6271	3	4.82e-259	73.66	5	P:GO:0048193; C:GO:0000139; C:GO:0005794; C:GO:0016020; C:GO:0098791	P:Golgi vesicle transport; C:Golgi membrane; C:Golgi apparatus; C:membrane; C:Golgi apparatus subcompartment
g640.t1	KAF9454054.1hypothetical protein P691DRAFT_771042	3	4.33e-190	88.32	17	P:GO:0000717; P:GO:0006289; P:GO:0006351; P:GO:0006357; P:GO:0006360; P:GO:0006367; P:GO:0006468; F:GO:0010314; F:GO:0032266; F:GO:0043168; F:GO:0140110; C:GO:0000112; C:GO:0000439; C:GO:0005675; C:GO:0005829; C:GO:1990391	P:nucleotide-excision repair, DNA duplex unwinding; P:nucleotide-excision repair; P:DNA-templated transcription; P:regulation of transcription by RNA polymerase II; P:transcription by RNA polymerase I; P:transcription initiation at RNA polymerase II promoter; P:protein phosphorylation; F:phosphatidylinositol-5-phosphate binding; F:phosphatidylinositol-3-phosphate binding; F:anion binding; F:trans…
g641.t1	KAF5351864.1hypothetical protein D9756_007577	3	4.28e-236	60.12	4	P:GO:0043248; F:GO:0000166; F:GO:0004672; F:GO:0005524	P:proteasome assembly; F:nucleotide binding; F:protein kinase activity; F:ATP binding	EC:2.7.12.1	dual-specificity kinase
g642.t1	XP_007327993.1hypothetical protein AGABI1DRAFT_36909	3	1.52e-140	93.18	4	F:GO:0004674; F:GO:0005524	F:protein serine/threonine kinase activity; F:ATP binding	EC:2.7.11.1	non-specific serine/threonine protein kinase
g643.t1	KAF5357219.1hypothetical protein D9756_006360	3	1.64e-69	72.27	1	C:GO:0016020	C:membrane
g644.t1	KAF7762703.1hypothetical protein Agabi119p4_9296	3	4.47e-35	57.09	3	F:GO:0003676; F:GO:0008270; C:GO:0005634	F:nucleic acid binding; F:zinc ion binding; C:nucleus
g645.t1	KAJ3576108.1hypothetical protein NP233_g672	3	4.01e-123	63.76	5	P:GO:0015074; F:GO:0003676; F:GO:0003723; F:GO:0008270; C:GO:0005634	P:DNA integration; F:nucleic acid binding; F:RNA binding; F:zinc ion binding; C:nucleus
g647.t1	KAJ3576108.1hypothetical protein NP233_g672	3	0	71.4	4	P:GO:0015074; F:GO:0003676; F:GO:0003723; C:GO:0005634	P:DNA integration; F:nucleic acid binding; F:RNA binding; C:nucleus
g648.t1	KAF5354082.1hypothetical protein D9756_007332	3	5.32e-74	67.9				EC:5.5.1.5	carboxy-cis,cis-muconate cyclase
g649.t1	KAF5347027.1hypothetical protein D9756_011014	3	1.15e-22	57.69	1	F:GO:0003824	F:catalytic activity
g650.t1	KIJ06628.1hypothetical protein PAXINDRAFT_91724	1	2.3e-06	44.49
g652.t1	KAF7761273.1hypothetical protein Agabi119p4_10682	3	1.43e-110	71.6	10	P:GO:0006259; P:GO:0015074; P:GO:0016311; F:GO:0003676; F:GO:0004721; F:GO:0004725; F:GO:0008270; F:GO:0016787; F:GO:0016791; C:GO:0005634	P:DNA metabolic process; P:DNA integration; P:dephosphorylation; F:nucleic acid binding; F:phosphoprotein phosphatase activity; F:protein tyrosine phosphatase activity; F:zinc ion binding; F:hydrolase activity; F:phosphatase activity; C:nucleus
g653.t1	KAF9445856.1SE-domain-containing protein	3	4.65e-246	82.58	20	P:GO:0006696; P:GO:0009267; P:GO:0016126; P:GO:0036170; P:GO:0036171; P:GO:0036180; P:GO:0036187; P:GO:0044249; P:GO:0051668; P:GO:0071466; F:GO:0004506; F:GO:0050660; F:GO:0140907; C:GO:0005789; C:GO:0005811; C:GO:0005886	P:ergosterol biosynthetic process; P:cellular response to starvation; P:sterol biosynthetic process; P:filamentous growth of a population of unicellular organisms in response to starvation; P:filamentous growth of a population of unicellular organisms in response to chemical stimulus; P:filamentous growth of a population of unicellular organisms in response to biotic stimulus; P:cell growth mode …	EC:1.14.13; EC:1.14.14.17	Acting on paired donors, with incorporation or reduction of molecular oxygen. The oxygen incorporated need not be derived from O2; squalene monooxygenase
g654.t1	KAF5361844.1hypothetical protein D9756_002074	3	8.87e-234	82.04	1	F:GO:0046872	F:metal ion binding
g655.t1	KAF5362462.1hypothetical protein D9756_002082	3	2.5e-285	84.93	16	P:GO:0007017; P:GO:0030838; P:GO:0034316; P:GO:0051017; P:GO:0051666; P:GO:2000601; F:GO:0008017; F:GO:0030674; F:GO:0051015; C:GO:0005826; C:GO:0005885; C:GO:0030139; C:GO:0030479; C:GO:0035838; C:GO:0099568; C:GO:1990819	P:microtubule-based process; P:positive regulation of actin filament polymerization; P:negative regulation of Arp2/3 complex-mediated actin nucleation; P:actin filament bundle assembly; P:actin cortical patch localization; P:positive regulation of Arp2/3 complex-mediated actin nucleation; F:microtubule binding; F:protein-macromolecule adaptor activity; F:actin filament binding; C:actomyosin contr…
g656.t1	KAF5362463.1hypothetical protein D9756_002083	3	1.28e-99	82.24	4	F:GO:0003955; F:GO:0010181	F:NAD(P)H dehydrogenase (quinone) activity; F:FMN binding	EC:1.6.5.2	NAD(P)H dehydrogenase (quinone)
g657.t1	KAJ3576108.1hypothetical protein NP233_g672	3	3.79e-24	62.78
g660.t1	KAF7776769.1hypothetical protein Agabi119p4_5162	3	1.95e-243	76.5	4	P:GO:0015074; F:GO:0003676; F:GO:0003723; C:GO:0005634	P:DNA integration; F:nucleic acid binding; F:RNA binding; C:nucleus
g661.t1	KAJ3574988.1hypothetical protein NP233_g1392	3	0	85.55	14	P:GO:0006886; P:GO:0015031; P:GO:0015833; P:GO:0042147; P:GO:0045053; P:GO:0065008; F:GO:0005215; C:GO:0000329; C:GO:0005770; C:GO:0005829; C:GO:0030906	P:intracellular protein transport; P:protein transport; P:peptide transport; P:retrograde transport, endosome to Golgi; P:protein retention in Golgi apparatus; P:regulation of biological quality; F:transporter activity; C:fungal-type vacuole membrane; C:late endosome; C:cytosol; C:retromer, cargo-selective complex
g662.t1	KAF9452418.1hypothetical protein P691DRAFT_804535	3	5.04e-240	78.18	9	P:GO:0006805; P:GO:0009231; F:GO:0003935; F:GO:0005525; C:GO:0005634; C:GO:0005737	P:xenobiotic metabolic process; P:riboflavin biosynthetic process; F:GTP cyclohydrolase II activity; F:GTP binding; C:nucleus; C:cytoplasm	EC:3.5.4.25	GTP cyclohydrolase II
g663.t1	KAF5364275.1hypothetical protein D9756_000750	3	7.87e-228	82.69	6	P:GO:0005975; F:GO:0004553; C:GO:0016020	P:carbohydrate metabolic process; F:hydrolase activity, hydrolyzing O-glycosyl compounds; C:membrane	EC:3.2.1	Glycosylases
g664.t1	KAJ3564834.1hypothetical protein NP233_g8031	3	0	74.87	13	P:GO:0006886; P:GO:0006897; P:GO:0015833; P:GO:0016050; P:GO:0032120; P:GO:0042147; P:GO:0044703; F:GO:0032266; F:GO:0043168; C:GO:0005628; C:GO:0005768; C:GO:0019898; C:GO:0030905	P:intracellular protein transport; P:endocytosis; P:peptide transport; P:vesicle organization; P:ascospore-type prospore membrane formation; P:retrograde transport, endosome to Golgi; P:multi-organism reproductive process; F:phosphatidylinositol-3-phosphate binding; F:anion binding; C:prospore membrane; C:endosome; C:extrinsic component of membrane; C:retromer, tubulation complex
g665.t1	KXN83743.1hypothetical protein AN958_00886	3	4.13e-61	80.56	1	C:GO:0000347	C:THO complex
g666.t1	KAF5363723.1hypothetical protein D9756_000743	3	1.65e-138	49.99	13	P:GO:0006886; P:GO:0006896; P:GO:0015833; P:GO:0016239; P:GO:0030029; P:GO:0032456; P:GO:0042147; P:GO:0065008; P:GO:0090156; F:GO:0019905; F:GO:0031267; C:GO:0000938; C:GO:0005829	P:intracellular protein transport; P:Golgi to vacuole transport; P:peptide transport; P:positive regulation of macroautophagy; P:actin filament-based process; P:endocytic recycling; P:retrograde transport, endosome to Golgi; P:regulation of biological quality; P:intracellular sphingolipid homeostasis; F:syntaxin binding; F:small GTPase binding; C:GARP complex; C:cytosol
g667.t1	KAF5363724.1hypothetical protein D9756_000742	3	0	74.41
g668.t1	XP_006459990.1hypothetical protein AGABI2DRAFT_191764	3	1.01e-197	95.55	18	P:GO:0000266; P:GO:0016559; P:GO:0016579; P:GO:0031331; P:GO:0032436; P:GO:0043248; P:GO:0045842; P:GO:0051781; P:GO:0062033; P:GO:1902906; F:GO:0004843; F:GO:0008237; C:GO:0005739; C:GO:0008541; C:GO:0031597; C:GO:0034399; C:GO:0034515	P:mitochondrial fission; P:peroxisome fission; P:protein deubiquitination; P:positive regulation of cellular catabolic process; P:positive regulation of proteasomal ubiquitin-dependent protein catabolic process; P:proteasome assembly; P:positive regulation of mitotic metaphase/anaphase transition; P:positive regulation of cell division; P:positive regulation of mitotic sister chromatid segregatio…	EC:3.4.19.12	ubiquitinyl hydrolase 1
g669.t1	KAF5363726.1hypothetical protein D9756_000740	3	4.62e-53	70.01	4	P:GO:0006412; F:GO:0003735; C:GO:0005840; C:GO:1990904	P:translation; F:structural constituent of ribosome; C:ribosome; C:ribonucleoprotein complex
g670.t1	KAF5364242.1hypothetical protein D9756_000739	3	0	83.85	24	P:GO:0000160; P:GO:0006995; P:GO:0010508; P:GO:0010628; P:GO:0016310; P:GO:0018105; P:GO:0032436; P:GO:0034599; P:GO:0034605; P:GO:0045842; P:GO:0045893; P:GO:0046777; P:GO:0048869; P:GO:0051321; P:GO:0051781; P:GO:0062033; P:GO:1903452; F:GO:0004674; F:GO:0005524; C:GO:0005634; C:GO:0005737	P:phosphorelay signal transduction system; P:cellular response to nitrogen starvation; P:positive regulation of autophagy; P:positive regulation of gene expression; P:phosphorylation; P:peptidyl-serine phosphorylation; P:positive regulation of proteasomal ubiquitin-dependent protein catabolic process; P:cellular response to oxidative stress; P:cellular response to heat; P:positive regulation of m…	EC:2.7.11.1	non-specific serine/threonine protein kinase
g671.t1	KAF5358412.1hypothetical protein D9756_001294	3	0	64.99	2	F:GO:0004672; F:GO:0005524	F:protein kinase activity; F:ATP binding	EC:2.7.11.1	non-specific serine/threonine protein kinase
g672.t1	KAF5358415.1hypothetical protein D9756_001293	3	3.7e-231	73.67	9	P:GO:0000724; P:GO:0006281; P:GO:0036297; F:GO:0004518; F:GO:0005488; F:GO:0008409; F:GO:0017108; F:GO:0070336; F:GO:1901363	P:double-strand break repair via homologous recombination; P:DNA repair; P:interstrand cross-link repair; F:nuclease activity; F:binding; F:5'-3' exonuclease activity; F:5'-flap endonuclease activity; F:flap-structured DNA binding; F:heterocyclic compound binding	EC:3.1.30; EC:3.1.21	Acting on ester bonds; Acting on ester bonds
g673.t1	KAF5358414.1hypothetical protein D9756_001292	3	0	73.46	4	F:GO:0036094; F:GO:0140657	F:small molecule binding; F:ATP-dependent activity
g674.t1	KAF5358011.1hypothetical protein D9756_001289	3	7.36e-156	74.47
g675.t1	KAF5358012.1hypothetical protein D9756_001288	3	0	91.17	15	P:GO:0000070; P:GO:0000724; P:GO:0006270; P:GO:0007064; P:GO:0009059; P:GO:0035753; P:GO:0045005; F:GO:0005524; F:GO:0016887; C:GO:0000785; C:GO:0005739; C:GO:0031390; C:GO:0043596	P:mitotic sister chromatid segregation; P:double-strand break repair via homologous recombination; P:DNA replication initiation; P:mitotic sister chromatid cohesion; P:macromolecule biosynthetic process; P:maintenance of DNA trinucleotide repeats; P:DNA-templated DNA replication maintenance of fidelity; F:ATP binding; F:ATP hydrolysis activity; C:chromatin; C:mitochondrion; C:Ctf18 RFC-like compl…	EC:3.6.1.15	nucleoside-triphosphate phosphatase
g676.t1	KAF5358009.1hypothetical protein D9756_001287	3	2.31e-62	81.97	3	F:GO:0005199; C:GO:0005576; C:GO:0009277	F:structural constituent of cell wall; C:extracellular region; C:fungal-type cell wall
g677.t1	KAF5358010.1hypothetical protein D9756_001286	3	1.64e-288	82.15	3	P:GO:0055085; F:GO:0022857; C:GO:0016020	P:transmembrane transport; F:transmembrane transporter activity; C:membrane
g678.t1	KAF5358007.1hypothetical protein D9756_001285	3	2.35e-259	81.95	14	P:GO:0006325; P:GO:0006378; P:GO:0006388; P:GO:0009410; P:GO:0016310; P:GO:0031124; P:GO:0051276; F:GO:0005524; F:GO:0046404; F:GO:0051731; C:GO:0005654; C:GO:0005849	P:chromatin organization; P:obsolete mRNA polyadenylation; P:tRNA splicing, via endonucleolytic cleavage and ligation; P:response to xenobiotic stimulus; P:phosphorylation; P:mRNA 3'-end processing; P:chromosome organization; F:ATP binding; F:ATP-dependent polydeoxyribonucleotide 5'-hydroxyl-kinase activity; F:polynucleotide 5'-hydroxyl-kinase activity; C:nucleoplasm; C:mRNA cleavage factor compl…	EC:2.7.1.78	polynucleotide 5'-hydroxyl-kinase
g679.t1	KAF5358400.1hypothetical protein D9756_001445	3	1.13e-141	89.29	7	P:GO:0045292; F:GO:0001069; F:GO:0003723; F:GO:0003729; F:GO:0008143; F:GO:1901363; C:GO:0005634	P:mRNA cis splicing, via spliceosome; F:regulatory region RNA binding; F:RNA binding; F:mRNA binding; F:poly(A) binding; F:heterocyclic compound binding; C:nucleus
g680.t1	KAF5357751.1hypothetical protein D9756_001446	3	5.89e-258	97.99	19	P:GO:0002143; P:GO:0006790; P:GO:0006879; P:GO:0044571; P:GO:0065008; P:GO:0070903; F:GO:0004123; F:GO:0030170; F:GO:0031071; F:GO:0046872; F:GO:0051536; C:GO:0005634; C:GO:0005759; C:GO:1990221	P:tRNA wobble position uridine thiolation; P:sulfur compound metabolic process; P:intracellular iron ion homeostasis; P:[2Fe-2S] cluster assembly; P:regulation of biological quality; P:mitochondrial tRNA thio-modification; F:cystathionine gamma-lyase activity; F:pyridoxal phosphate binding; F:cysteine desulfurase activity; F:metal ion binding; F:iron-sulfur cluster binding; C:nucleus; C:mitochond…	EC:2.8.1.7; EC:4.4.1.1	cysteine desulfurase; cystathionine gamma-lyase
g681.t1	CDJ79821.1cellobiohydrolase II precursor	3	6.47E-310	85.3	8	P:GO:0030245; F:GO:0004553; F:GO:0030248; C:GO:0005576	P:cellulose catabolic process; F:hydrolase activity, hydrolyzing O-glycosyl compounds; F:cellulose binding; C:extracellular region	EC:3.2.1	Glycosylases
g682.t1	KXN92185.1COP9 signalosome complex subunit 8	3	5.34e-107	76.77
g683.t1	KAF5357953.1hypothetical protein D9756_001450	3	2.73e-117	94.63	6	F:GO:0017018; F:GO:0046872; C:GO:0005634	F:myosin phosphatase activity; F:metal ion binding; C:nucleus	EC:3.1.3.16	protein-serine/threonine phosphatase
g684.t1	KAF5358281.1hypothetical protein D9756_001451	3	5.1e-169	87.46	1	F:GO:0016787	F:hydrolase activity	EC:3	Hydrolases
g685.t1	KAF5357954.1hypothetical protein D9756_001452	3	6.05e-227	76.9	1	F:GO:0016787	F:hydrolase activity
g686.t1	KAF8201776.1hypothetical protein BJ912DRAFT_517139	3	1.13e-21	75.35	5	P:GO:0043085; P:GO:0045292; F:GO:0061632; C:GO:0005829; C:GO:0071014	P:positive regulation of catalytic activity; P:mRNA cis splicing, via spliceosome; F:RNA lariat debranching enzyme activator activity; C:cytosol; C:post-mRNA release spliceosomal complex
g687.t1	KAF5357956.1hypothetical protein D9756_001454	3	3.11e-281	84.12	2	P:GO:0009058; F:GO:0030170	P:biosynthetic process; F:pyridoxal phosphate binding
g688.t1	KAF5357957.1hypothetical protein D9756_001455	3	2.79e-178	86.7	15	P:GO:0000050; P:GO:0006525; P:GO:0019547; P:GO:0043086; P:GO:0090368; F:GO:0004053; F:GO:0008270; F:GO:0030145; F:GO:0046872; F:GO:0090369; C:GO:0005634; C:GO:0005829; C:GO:0043332	P:urea cycle; P:arginine metabolic process; P:arginine catabolic process to ornithine; P:negative regulation of catalytic activity; P:regulation of ornithine metabolic process; F:arginase activity; F:zinc ion binding; F:manganese ion binding; F:metal ion binding; F:ornithine carbamoyltransferase inhibitor activity; C:nucleus; C:cytosol; C:mating projection tip	EC:3.5.3.1	arginase
g689.t1	XP_001841141.2HNWD1	3	4.91e-33	55.9
g690.t1	KXN81269.1hypothetical protein AN958_05356	3	2.53e-88	86.74	10	P:GO:0006487; P:GO:0006888; P:GO:0019408; F:GO:0002094; F:GO:0016765; F:GO:0045547; C:GO:0005783; C:GO:0005811; C:GO:1904423	P:protein N-linked glycosylation; P:endoplasmic reticulum to Golgi vesicle-mediated transport; P:dolichol biosynthetic process; F:polyprenyltransferase activity; F:transferase activity, transferring alkyl or aryl (other than methyl) groups; F:dehydrodolichyl diphosphate synthase activity; C:endoplasmic reticulum; C:lipid droplet; C:dehydrodolichyl diphosphate synthase complex	EC:2.5.1.87	ditrans,polycis-polyprenyl diphosphate synthase [(2E,6E)-farnesyl
g691.t1	KAF5357771.1hypothetical protein D9756_001159	3	7.33e-256	59.22
g692.t1	KAJ3560359.1hypothetical protein NP233_g10892	3	2.51e-157	87.33	4	P:GO:0015074; F:GO:0003676; F:GO:0003723; C:GO:0005634	P:DNA integration; F:nucleic acid binding; F:RNA binding; C:nucleus
g693.t1	SJL06764.1uncharacterized protein ARMOST_10106	3	6.9e-82	48.42	4	P:GO:0015074; F:GO:0003676; F:GO:0003723; C:GO:0005634	P:DNA integration; F:nucleic acid binding; F:RNA binding; C:nucleus
g694.t1	KAF9449545.1ketopantoate hydroxymethyltransferase	3	7.16e-144	89.41	5	P:GO:0015940; F:GO:0003864; C:GO:0005739	P:pantothenate biosynthetic process; F:3-methyl-2-oxobutanoate hydroxymethyltransferase activity; C:mitochondrion	EC:2.1.2.11	3-methyl-2-oxobutanoate hydroxymethyltransferase
g695.t1	KAF9449547.1hypothetical protein P691DRAFT_758956	3	0	82.14	3	P:GO:0006338; F:GO:0032454; C:GO:0005634	P:chromatin remodeling; F:histone H3K9 demethylase activity; C:nucleus
g696.t1	KAF5363778.1hypothetical protein D9756_000884	3	2.65e-145	80.7
g697.t1	KAJ3566870.1hypothetical protein NP233_g6730	3	0	73.65	23	P:GO:0007234; P:GO:0009267; P:GO:0030682; P:GO:0031505; P:GO:0031954; P:GO:0032147; P:GO:0032874; P:GO:0032956; P:GO:0034599; P:GO:0034605; P:GO:0036244; P:GO:0042783; P:GO:0043406; P:GO:0051495; P:GO:1900436; P:GO:1900442; P:GO:1900445; F:GO:0000156; F:GO:0030295; F:GO:0031435; F:GO:0042803; C:GO:0005737; C:GO:1990315	P:osmosensory signaling via phosphorelay pathway; P:cellular response to starvation; P:symbiont-mediated perturbation of host defenses; P:fungal-type cell wall organization; P:positive regulation of protein autophosphorylation; P:activation of protein kinase activity; P:positive regulation of stress-activated MAPK cascade; P:regulation of actin cytoskeleton organization; P:cellular response to ox…
g698.t1	KAJ3566871.1hypothetical protein NP233_g6731	3	0	75.25	8	P:GO:0031048; P:GO:0045892; P:GO:0051276; C:GO:0000228; C:GO:0000785; C:GO:0005634; C:GO:0016604; C:GO:1990477	P:regulatory ncRNA-mediated heterochromatin formation; P:negative regulation of DNA-templated transcription; P:chromosome organization; C:nuclear chromosome; C:chromatin; C:nucleus; C:nuclear body; C:MTREC complex
g700.t1	KAF5348864.1hypothetical protein D9756_009755	3	2.19e-34	64.39	11	P:GO:0006267; P:GO:0009059; P:GO:1902975; F:GO:0003688; F:GO:1901363; C:GO:0000781; C:GO:0000785; C:GO:0005656; C:GO:0005664; C:GO:0031261; C:GO:0043596	P:pre-replicative complex assembly involved in nuclear cell cycle DNA replication; P:macromolecule biosynthetic process; P:mitotic DNA replication initiation; F:DNA replication origin binding; F:heterocyclic compound binding; C:chromosome, telomeric region; C:chromatin; C:nuclear pre-replicative complex; C:nuclear origin of replication recognition complex; C:DNA replication preinitiation complex;…
g701.t1	KAF5348780.1hypothetical protein D9756_009748	3	0	91.81	36	P:GO:0000727; P:GO:0006267; P:GO:0006268; P:GO:0006271; P:GO:0006279; P:GO:0010558; P:GO:0030174; P:GO:0032508; P:GO:0033260; P:GO:0045005; P:GO:0051346; P:GO:1902975; P:GO:1905775; P:GO:2000104; F:GO:0003677; F:GO:0003678; F:GO:0003682; F:GO:0003688; F:GO:0003697; F:GO:0005524; F:GO:0016887; C:GO:0005656; C:GO:0005737; C:GO:0030875; C:GO:0031261; C:GO:0031298; C:GO:0042555; C:GO:0043596; C:GO:00…	P:double-strand break repair via break-induced replication; P:pre-replicative complex assembly involved in nuclear cell cycle DNA replication; P:DNA unwinding involved in DNA replication; P:DNA strand elongation involved in DNA replication; P:premeiotic DNA replication; P:negative regulation of macromolecule biosynthetic process; P:regulation of DNA-templated DNA replication initiation; P:DNA dup…	EC:3.6.1.15	nucleoside-triphosphate phosphatase
g702.t1	KAF5348931.1hypothetical protein D9756_009738	3	0	91.62	4	F:GO:0005524; F:GO:0016887	F:ATP binding; F:ATP hydrolysis activity	EC:3.6.1.15	nucleoside-triphosphate phosphatase
g703.t1	KAF9451101.1hypothetical protein P691DRAFT_808761	3	2.5e-278	88.67	4	F:GO:0005524; F:GO:0016887	F:ATP binding; F:ATP hydrolysis activity	EC:3.6.1.15	nucleoside-triphosphate phosphatase
g704.t1	KAJ3563523.1hypothetical protein NP233_g8894	3	3.64e-254	85.28	3	P:GO:0005975; F:GO:0030248; C:GO:0005576	P:carbohydrate metabolic process; F:cellulose binding; C:extracellular region
g707.t1	KAF7770962.1hypothetical protein Agabi119p4_6936	3	8.85e-138	81.01	3	P:GO:0015074; F:GO:0003723; C:GO:0005634	P:DNA integration; F:RNA binding; C:nucleus
g708.t1	KAF5360851.1hypothetical protein D9756_004554	3	1.18e-10	74.51	2	F:GO:0005488; C:GO:0043227	F:binding; C:membrane-bounded organelle
g709.t1	KAF5362219.1hypothetical protein D9756_002520	3	3.28e-42	55.02	4	F:GO:0003676; F:GO:0008270; C:GO:0005634; C:GO:0043227	F:nucleic acid binding; F:zinc ion binding; C:nucleus; C:membrane-bounded organelle
g710.t1	KAJ3560359.1hypothetical protein NP233_g10892	3	1.92e-72	79.17
g711.t1	KAF7770962.1hypothetical protein Agabi119p4_6936	3	1.48e-175	86.99	3	P:GO:0015074; F:GO:0003723; C:GO:0005634	P:DNA integration; F:RNA binding; C:nucleus
g713.t1	KAJ3560359.1hypothetical protein NP233_g10892	3	1.78e-81	82.09
g716.t1	KXN83390.1hypothetical protein AN958_01527	3	3.4e-75	83.33
g717.t1	KAF5359818.1hypothetical protein D9756_003238	3	0	87.09	15	P:GO:0006874; P:GO:0065008; P:GO:0070588; F:GO:0005388; F:GO:0005509; F:GO:0005524; F:GO:0016887; F:GO:0042625; C:GO:0000329; C:GO:0005886; C:GO:0016020	P:intracellular calcium ion homeostasis; P:regulation of biological quality; P:calcium ion transmembrane transport; F:P-type calcium transporter activity; F:calcium ion binding; F:ATP binding; F:ATP hydrolysis activity; F:ATPase-coupled ion transmembrane transporter activity; C:fungal-type vacuole membrane; C:plasma membrane; C:membrane	EC:7.2.2.10; EC:3.6.1.15	P-type Ca(2+) transporter; nucleoside-triphosphate phosphatase
g718.t1	KAF5359093.1hypothetical protein D9756_003237	3	0	94.57	22	P:GO:0005992; P:GO:0006970; P:GO:0006974; P:GO:0016311; P:GO:0030437; P:GO:0036168; P:GO:0036180; P:GO:0044249; P:GO:0044419; P:GO:0044703; P:GO:0070301; P:GO:0070415; P:GO:0071236; P:GO:0071465; P:GO:0071466; P:GO:0090441; P:GO:0097237; F:GO:0003825; F:GO:0016791; C:GO:0005829; C:GO:0005946	P:trehalose biosynthetic process; P:response to osmotic stress; P:DNA damage response; P:dephosphorylation; P:ascospore formation; P:filamentous growth of a population of unicellular organisms in response to heat; P:filamentous growth of a population of unicellular organisms in response to biotic stimulus; P:cellular biosynthetic process; P:biological process involved in interspecies interaction …	EC:2.4.1.15; EC:3.1.3	alpha,alpha-trehalose-phosphate synthase (UDP-forming); Acting on ester bonds
g719.t1	KAJ8521129.1hypothetical protein ONZ45_g2155	3	3.15e-158	89.46	10	P:GO:0000027; P:GO:0002182; P:GO:0042254; F:GO:0003735; F:GO:0070180; F:GO:1901363; C:GO:0005840; C:GO:0022625; C:GO:0030686; C:GO:1990904	P:ribosomal large subunit assembly; P:cytoplasmic translational elongation; P:ribosome biogenesis; F:structural constituent of ribosome; F:large ribosomal subunit rRNA binding; F:heterocyclic compound binding; C:ribosome; C:cytosolic large ribosomal subunit; C:90S preribosome; C:ribonucleoprotein complex
g720.t1	KAF5359261.1hypothetical protein D9756_003233	3	3.12e-292	61.86
g721.t1	KAJ3562707.1hypothetical protein NP233_g9406	3	3.88e-258	94.95	10	F:GO:0005524; F:GO:0005525; F:GO:0016887; F:GO:0043023; C:GO:0005737	F:ATP binding; F:GTP binding; F:ATP hydrolysis activity; F:ribosomal large subunit binding; C:cytoplasm	EC:3.6.1.15	nucleoside-triphosphate phosphatase
g722.t1	KAF5359663.1hypothetical protein D9756_003229	3	1.39e-50	92.17
g723.t1	KAF5359414.1hypothetical protein D9756_003228	3	8.2e-297	70.97
g724.t1	KAF5360524.1hypothetical protein D9756_004509	3	0	78.69	7	P:GO:0009987; F:GO:0016758; C:GO:0005886; C:GO:0016020; C:GO:0030659	P:cellular process; F:hexosyltransferase activity; C:plasma membrane; C:membrane; C:cytoplasmic vesicle membrane	EC:2.4.1	Glycosyltransferases
g725.t1	KXN85063.1Ubiquitin-conjugating enzyme E2 1	3	4.62e-92	94.52	14	P:GO:0000209; P:GO:0016050; P:GO:0036503; P:GO:0043161; P:GO:0044248; F:GO:0005524; F:GO:0031625; F:GO:0061630; F:GO:0061631; C:GO:0000502; C:GO:0005634; C:GO:0005829	P:protein polyubiquitination; P:vesicle organization; P:ERAD pathway; P:proteasome-mediated ubiquitin-dependent protein catabolic process; P:cellular catabolic process; F:ATP binding; F:ubiquitin protein ligase binding; F:ubiquitin protein ligase activity; F:ubiquitin conjugating enzyme activity; C:proteasome complex; C:nucleus; C:cytosol	EC:2.3.2.23	E2 ubiquitin-conjugating enzyme
g726.t1	KAF9448768.1glycoside hydrolase family 15 protein	3	0	84.2	6	P:GO:0005975; P:GO:0005976; P:GO:0016052; P:GO:0044237; F:GO:0004553; F:GO:0016787	P:carbohydrate metabolic process; P:polysaccharide metabolic process; P:carbohydrate catabolic process; P:cellular metabolic process; F:hydrolase activity, hydrolyzing O-glycosyl compounds; F:hydrolase activity	EC:3.2.1	Glycosylases
g727.t1	KAF5360491.1hypothetical protein D9756_004521	3	6.16e-257	71.57	30	P:GO:0000467; P:GO:0000973; P:GO:0006396; P:GO:0008298; P:GO:0033621; P:GO:0034473; P:GO:0034475; P:GO:0034476; P:GO:0043628; P:GO:0070651; P:GO:0071031; P:GO:0071035; P:GO:0071036; P:GO:0071037; P:GO:0071038; P:GO:0071039; P:GO:0071040; P:GO:0071042; P:GO:0071044; P:GO:0071051; P:GO:0110064; F:GO:0000175; F:GO:0008408; F:GO:0097159; C:GO:0000176; C:GO:0000228; C:GO:0000785; C:GO:0005730; C:GO:19…	P:exonucleolytic trimming to generate mature 3'-end of 5.8S rRNA from tricistronic rRNA transcript (SSU-rRNA, 5.8S rRNA, LSU-rRNA); P:post-transcriptional tethering of RNA polymerase II gene DNA at nuclear periphery; P:RNA processing; P:intracellular mRNA localization; P:nuclear-transcribed mRNA catabolic process, meiosis-specific transcripts; P:U1 snRNA 3'-end processing; P:U4 snRNA 3'-end proce…	EC:3.1.13; EC:3.1.15	Acting on ester bonds; Acting on ester bonds
g728.t1	KAF5360487.1hypothetical protein D9756_004529	3	1.16e-188	69.72
g729.t1	KAF5360819.1hypothetical protein D9756_005198	3	2.04e-22	78.51	23	P:GO:0006406; P:GO:0006607; P:GO:0006610; P:GO:0006611; P:GO:0007088; P:GO:0010389; P:GO:0015833; P:GO:0017038; P:GO:0030162; P:GO:0031323; P:GO:0031503; P:GO:0060188; P:GO:0071166; F:GO:0005215; F:GO:0005525; F:GO:0008139; F:GO:0032550; F:GO:0061608; C:GO:0005643; C:GO:0005737; C:GO:0031965; C:GO:0034399; C:GO:0110165	P:mRNA export from nucleus; P:NLS-bearing protein import into nucleus; P:ribosomal protein import into nucleus; P:protein export from nucleus; P:regulation of mitotic nuclear division; P:regulation of G2/M transition of mitotic cell cycle; P:peptide transport; P:protein import; P:regulation of proteolysis; P:regulation of cellular metabolic process; P:protein-containing complex localization; P:re…
g730.t1	KAF5354003.1hypothetical protein D9756_007264	3	2.62e-119	91.24	8	P:GO:0006415; P:GO:0070126; F:GO:0003723; F:GO:0003747; F:GO:0016149; F:GO:1901363; C:GO:0005743; C:GO:0005829	P:translational termination; P:mitochondrial translational termination; F:RNA binding; F:translation release factor activity; F:translation release factor activity, codon specific; F:heterocyclic compound binding; C:mitochondrial inner membrane; C:cytosol
g731.t1	KAJ3569146.1hypothetical protein NP233_g5238	3	2.13e-164	65.1	11	P:GO:0000209; P:GO:0006357; P:GO:0031331; P:GO:0032436; P:GO:0044011; P:GO:1900189; P:GO:1900192; F:GO:0008270; F:GO:0031624; F:GO:0061630; C:GO:0005622	P:protein polyubiquitination; P:regulation of transcription by RNA polymerase II; P:positive regulation of cellular catabolic process; P:positive regulation of proteasomal ubiquitin-dependent protein catabolic process; P:single-species biofilm formation on inanimate substrate; P:positive regulation of cell adhesion involved in single-species biofilm formation; P:positive regulation of single-spec…	EC:2.3.2	Acyltransferases
g732.t1	KAF5354077.1hypothetical protein D9756_007258	3	0	95.19	9	P:GO:0006679; P:GO:0030447; P:GO:0032259; P:GO:0044419; F:GO:0008757; C:GO:0005886; C:GO:0016020	P:glucosylceramide biosynthetic process; P:filamentous growth; P:methylation; P:biological process involved in interspecies interaction between organisms; F:S-adenosylmethionine-dependent methyltransferase activity; C:plasma membrane; C:membrane	EC:2.1.1	Transferring one-carbon groups
g733.t1	KAF9445264.1DUF221-domain-containing protein	3	0	84.87	8	P:GO:0070588; P:GO:0098655; F:GO:0005227; F:GO:0015085; C:GO:0000329; C:GO:0005783; C:GO:0016020	P:calcium ion transmembrane transport; P:monoatomic cation transmembrane transport; F:calcium-activated cation channel activity; F:calcium ion transmembrane transporter activity; C:fungal-type vacuole membrane; C:endoplasmic reticulum; C:membrane
g734.t1	PPR01199.1hypothetical protein CVT26_016080	3	0	78.9	37	P:GO:0000070; P:GO:0006260; P:GO:0006279; P:GO:0006281; P:GO:0006287; P:GO:0006297; P:GO:0006303; P:GO:0007064; P:GO:0010964; P:GO:0031573; P:GO:0033314; P:GO:0035822; P:GO:0042276; P:GO:0045004; P:GO:0045892; P:GO:0071897; P:GO:0090053; P:GO:0090230; P:GO:1902975; P:GO:1903460; F:GO:0000166; F:GO:0003677; F:GO:0003690; F:GO:0003697; F:GO:0003729; F:GO:0003887; F:GO:0008270; F:GO:0008310; F:GO:00…	P:mitotic sister chromatid segregation; P:DNA replication; P:premeiotic DNA replication; P:DNA repair; P:base-excision repair, gap-filling; P:nucleotide-excision repair, DNA gap filling; P:double-strand break repair via nonhomologous end joining; P:mitotic sister chromatid cohesion; P:regulation of regulatory ncRNA-mediated heterochromatin formation; P:mitotic intra-S DNA damage checkpoint signal…	EC:3.1.11.1; EC:3.1.15; EC:2.7.7.7	exodeoxyribonuclease I; Acting on ester bonds; DNA-directed DNA polymerase
g735.t1	KAJ3573553.1hypothetical protein NP233_g2358	3	0	83.37	2	P:GO:0006355; F:GO:0005488	P:regulation of DNA-templated transcription; F:binding
g736.t1	KAF5352428.1hypothetical protein D9756_005922	3	0	88.11	10	P:GO:0000447; P:GO:0000472; P:GO:0000480; P:GO:0006364; F:GO:0030515; F:GO:1901363; C:GO:0005730; C:GO:0032040; C:GO:0034388	P:endonucleolytic cleavage in ITS1 to separate SSU-rRNA from 5.8S rRNA and LSU-rRNA from tricistronic rRNA transcript (SSU-rRNA, 5.8S rRNA, LSU-rRNA); P:endonucleolytic cleavage to generate mature 5'-end of SSU-rRNA from (SSU-rRNA, 5.8S rRNA, LSU-rRNA); P:endonucleolytic cleavage in 5'-ETS of tricistronic rRNA transcript (SSU-rRNA, 5.8S rRNA, LSU-rRNA); P:rRNA processing; F:snoRNA binding; F:hete…
g737.t1	KXN88822.1hypothetical protein AN958_06691	3	8.97e-73	65.04	2	F:GO:0008270; F:GO:0046872	F:zinc ion binding; F:metal ion binding
g738.t1	KAF7784122.1hypothetical protein Agabi119p4_287	3	4.18e-64	64.52	2	F:GO:0008270; F:GO:0046872	F:zinc ion binding; F:metal ion binding
g739.t1	KXN88821.12,5-diamino-6-ribosylamino-4(3H)-pyrimidinone 5'-phosphate reductase	3	1.96e-89	72.25	2	P:GO:0009231; F:GO:0008703	P:riboflavin biosynthetic process; F:5-amino-6-(5-phosphoribosylamino)uracil reductase activity	EC:1.1.1.302	2,5-diamino-6-(ribosylamino)-4(3H)-pyrimidinone 5'-phosphate reductase
g740.t1	KXN88820.1hypothetical protein AN958_06689	3	1.92e-93	58.34	1	F:GO:0005085	F:guanyl-nucleotide exchange factor activity
g741.t1	KAF5352424.1hypothetical protein D9756_005928	3	0	89.84	9	P:GO:0006488; P:GO:0097502; F:GO:0004376; F:GO:0052918; F:GO:0052926; C:GO:0005789	P:dolichol-linked oligosaccharide biosynthetic process; P:mannosylation; F:glycolipid mannosyltransferase activity; F:dol-P-Man:Man(8)GlcNAc(2)-PP-Dol alpha-1,2-mannosyltransferase activity; F:dol-P-Man:Man(6)GlcNAc(2)-PP-Dol alpha-1,2-mannosyltransferase activity; C:endoplasmic reticulum membrane	EC:2.4.1.261; EC:2.4.1.259	dolichyl-P-Man:Man8GlcNAc2-PP-dolichol alpha-1,2-mannosyltransferase; dolichyl-P-Man:Man6GlcNAc2-PP-dolichol alpha-1,2-mannosyltransferase
g742.t1	KAF5352425.1hypothetical protein D9756_005929	3	3.35e-160	65.2	1	C:GO:0016020	C:membrane
g743.t1	KXN90684.1Rho1 guanine nucleotide exchange factor 1	3	5.36e-302	65.46	3	P:GO:0035556; F:GO:0005085; C:GO:0110165	P:intracellular signal transduction; F:guanyl-nucleotide exchange factor activity; C:cellular anatomical entity
g744.t1	KAF5362492.1hypothetical protein D9756_002202	3	2.53e-122	90.11	13	P:GO:0001510; P:GO:0030488; P:GO:0051017; F:GO:0008173; F:GO:0008757; F:GO:0030674; F:GO:0051015; F:GO:0052735; C:GO:0005884; C:GO:0030479; C:GO:0032432; C:GO:0043332; C:GO:0099568	P:RNA methylation; P:tRNA methylation; P:actin filament bundle assembly; F:RNA methyltransferase activity; F:S-adenosylmethionine-dependent methyltransferase activity; F:protein-macromolecule adaptor activity; F:actin filament binding; F:tRNA (cytidine-3-)-methyltransferase activity; C:actin filament; C:actin cortical patch; C:actin filament bundle; C:mating projection tip; C:cytoplasmic region	EC:2.1.1	Transferring one-carbon groups
g745.t1	KXN90262.1hypothetical protein AN958_04053	1	6.41e-09	61.54
g746.t1	KAF9447305.1putative CyP450 monooxygenase	3	1.35e-95	82.22	2	F:GO:0016491; F:GO:0046872	F:oxidoreductase activity; F:metal ion binding	EC:1	Oxidoreductases
g747.t1	KAJ3574466.1hypothetical protein NP233_g1738	3	0	73.81	6	P:GO:0009437; P:GO:0097164; F:GO:0004092; F:GO:0016746; C:GO:0005739; C:GO:0005777	P:carnitine metabolic process; P:ammonium ion metabolic process; F:carnitine O-acetyltransferase activity; F:acyltransferase activity; C:mitochondrion; C:peroxisome	EC:2.3.1.7	carnitine O-acetyltransferase
g748.t1	KXN81752.1hypothetical protein AN958_03769	3	2.29e-93	87.77
g749.t1	KAJ3569382.1hypothetical protein NP233_g5079	3	1.7e-256	64.53	13	P:GO:0006898; P:GO:0032781; P:GO:0048309; P:GO:0051345; P:GO:0072318; F:GO:0030276; F:GO:0030544; F:GO:0031593; F:GO:0043130; C:GO:0005789; C:GO:0005829; C:GO:0031982; C:GO:0032991	P:receptor-mediated endocytosis; P:positive regulation of ATP-dependent activity; P:endoplasmic reticulum inheritance; P:positive regulation of hydrolase activity; P:clathrin coat disassembly; F:clathrin binding; F:Hsp70 protein binding; F:polyubiquitin modification-dependent protein binding; F:ubiquitin binding; C:endoplasmic reticulum membrane; C:cytosol; C:vesicle; C:protein-containing complex
g750.t1	KAF5361099.1hypothetical protein D9756_004622	3	2.08e-300	94.12	6	P:GO:0006508; F:GO:0004222; F:GO:0046872	P:proteolysis; F:metalloendopeptidase activity; F:metal ion binding	EC:3.4.24	Acting on peptide bonds (peptidases)
g753.t1	KAF5350717.1hypothetical protein D9756_008603	3	3.08e-156	63.01	2	P:GO:0006511; F:GO:0031625	P:ubiquitin-dependent protein catabolic process; F:ubiquitin protein ligase binding
g754.t1	KAF5351826.1hypothetical protein D9756_007515	3	1.6e-125	83.67	1	C:GO:0016020	C:membrane
g755.t1	KAF5351676.1hypothetical protein D9756_007514	3	0	95.32	30	P:GO:0000028; P:GO:0000749; P:GO:0006820; P:GO:0006886; P:GO:0006892; P:GO:0006897; P:GO:0015711; P:GO:0015833; P:GO:0015914; P:GO:0031139; P:GO:0032456; P:GO:0034204; P:GO:0045332; P:GO:0048194; P:GO:0048522; P:GO:2000243; F:GO:0000287; F:GO:0005524; F:GO:0016887; F:GO:0042626; F:GO:0090555; C:GO:0005783; C:GO:0005802; C:GO:0005886; C:GO:0016020; C:GO:1990530	P:ribosomal small subunit assembly; P:response to pheromone triggering conjugation with cellular fusion; P:monoatomic anion transport; P:intracellular protein transport; P:post-Golgi vesicle-mediated transport; P:endocytosis; P:organic anion transport; P:peptide transport; P:phospholipid transport; P:positive regulation of conjugation with cellular fusion; P:endocytic recycling; P:lipid transloca…	EC:7.6.2.1; EC:7.2.2; EC:3.6.1.15	P-type phospholipid transporter; Catalysing the translocation of inorganic cations; nucleoside-triphosphate phosphatase
g756.t1	KXN87370.1Neutrophil cytosol factor 2	3	2.96e-252	76.61
g757.t1	XP_007328365.1hypothetical protein AGABI1DRAFT_112492	3	1.38e-150	85.26	10	P:GO:0030148; P:GO:0030497; P:GO:0042761; F:GO:0045703; F:GO:0141040; C:GO:0005789	P:sphingolipid biosynthetic process; P:fatty acid elongation; P:very long-chain fatty acid biosynthetic process; F:ketoreductase activity; F:very-long-chain 3-oxoacyl-CoA reductase activity; C:endoplasmic reticulum membrane	EC:1.1.1.330	very-long-chain 3-oxoacyl-CoA reductase
g758.t1	KXN87368.1Pentafunctional AROM polypeptide	3	1.64e-184	76.24	2	F:GO:0003824	F:catalytic activity
g759.t1	KXN87365.1Glucosamine-6-phosphate isomerase	3	2.19e-124	83.56	8	P:GO:0006043; P:GO:0006046; P:GO:0036180; P:GO:0044419; P:GO:0071704; F:GO:0004342; F:GO:0016787; F:GO:0016861	P:glucosamine catabolic process; P:N-acetylglucosamine catabolic process; P:filamentous growth of a population of unicellular organisms in response to biotic stimulus; P:biological process involved in interspecies interaction between organisms; P:organic substance metabolic process; F:glucosamine-6-phosphate deaminase activity; F:hydrolase activity; F:intramolecular oxidoreductase activity, inter…	EC:3.5.99.6; EC:5.3.1	glucosamine-6-phosphate deaminase; Intramolecular oxidoreductases
g760.t1	KAJ3576108.1hypothetical protein NP233_g672	3	1.39e-17	63.14
g761.t1	KXN84186.1Gag-Pol polyprotein, partial	3	5.53e-15	54.93	3	F:GO:0003676; F:GO:0008270; C:GO:0005634	F:nucleic acid binding; F:zinc ion binding; C:nucleus
g762.t1	KAF7773581.1hypothetical protein Agabi119p4_5748	3	3.62e-82	83.73	1	F:GO:0003676	F:nucleic acid binding
g763.t1	KAJ3576108.1hypothetical protein NP233_g672	3	4.35e-136	72.76	4	P:GO:0006259; P:GO:0015074; F:GO:0003676; C:GO:0005634	P:DNA metabolic process; P:DNA integration; F:nucleic acid binding; C:nucleus
g764.t1	KAJ3576108.1hypothetical protein NP233_g672	3	2.67e-37	67.33	4	P:GO:0015074; F:GO:0003676; F:GO:0003723; C:GO:0005634	P:DNA integration; F:nucleic acid binding; F:RNA binding; C:nucleus
g765.t1	KAF7762682.1hypothetical protein Agabi119p4_9275	3	2.01e-59	79.32	4	P:GO:0015074; F:GO:0003676; F:GO:0003723; C:GO:0005634	P:DNA integration; F:nucleic acid binding; F:RNA binding; C:nucleus
g766.t1	KAF5360975.1hypothetical protein D9756_004486	3	3.65e-64	61.94	3	F:GO:0003676; F:GO:0008270; C:GO:0005634	F:nucleic acid binding; F:zinc ion binding; C:nucleus
g767.t1	KAF5364065.1hypothetical protein D9756_000167	3	0	93.53	10	P:GO:0006537; P:GO:0010133; P:GO:0034198; P:GO:0046700; P:GO:1901361; F:GO:0003842; F:GO:0016646; C:GO:0005759	P:glutamate biosynthetic process; P:proline catabolic process to glutamate; P:cellular response to amino acid starvation; P:heterocycle catabolic process; P:organic cyclic compound catabolic process; F:1-pyrroline-5-carboxylate dehydrogenase activity; F:oxidoreductase activity, acting on the CH-NH group of donors, NAD or NADP as acceptor; C:mitochondrial matrix	EC:1.2.1.88; EC:1.5.1	L-glutamate gamma-semialdehyde dehydrogenase; Acting on the CH-NH group of donors
g768.t1	KAF5364064.1hypothetical protein D9756_000168	3	0	93.32	3	P:GO:0006511; F:GO:0031625; C:GO:0031461	P:ubiquitin-dependent protein catabolic process; F:ubiquitin protein ligase binding; C:cullin-RING ubiquitin ligase complex
g769.t1	KAF5364063.1hypothetical protein D9756_000169	3	7.76e-238	92.78	4	P:GO:0045292; C:GO:0005682; C:GO:0071014; C:GO:1990904	P:mRNA cis splicing, via spliceosome; C:U5 snRNP; C:post-mRNA release spliceosomal complex; C:ribonucleoprotein complex
g770.t1	KAJ3572867.1hypothetical protein NP233_g2808	3	6.67e-93	81.57	8	F:GO:0004497; F:GO:0005506; F:GO:0016705; F:GO:0020037	F:monooxygenase activity; F:iron ion binding; F:oxidoreductase activity, acting on paired donors, with incorporation or reduction of molecular oxygen; F:heme binding	EC:1.14	Acting on paired donors, with incorporation or reduction of molecular oxygen. The oxygen incorporated need not be derived from O2
g771.t1	KXN92290.1putative methylcrotonoyl-CoA carboxylase beta chain, mitochondrial	3	1.69e-257	90.95	4	P:GO:0006552; F:GO:0016874	P:L-leucine catabolic process; F:ligase activity	EC:6	Ligases
g772.t1	KAF5364332.1hypothetical protein D9756_000183	3	1.09e-234	83.6	3	P:GO:0016192; P:GO:0043547; F:GO:0005096	P:vesicle-mediated transport; P:positive regulation of GTPase activity; F:GTPase activator activity
g773.t1	KAF5364333.1hypothetical protein D9756_000182	3	2.02e-80	82.95	14	P:GO:0005992; P:GO:0010914; P:GO:0022603; P:GO:0043386; P:GO:0043941; P:GO:0044703; P:GO:0045597; P:GO:0071482; P:GO:0075308; P:GO:0090068; P:GO:1903046; C:GO:0005634; C:GO:0005737	P:trehalose biosynthetic process; P:positive regulation of sterigmatocystin biosynthetic process; P:regulation of anatomical structure morphogenesis; P:mycotoxin biosynthetic process; P:positive regulation of sexual sporulation resulting in formation of a cellular spore; P:multi-organism reproductive process; P:positive regulation of cell differentiation; P:cellular response to light stimulus; P:…
g774.t1	KAF5364330.1hypothetical protein D9756_000181	3	0	67.4
g775.t1	XP_006456822.1putative HMG1 protein	3	1.23e-157	73.11	2	F:GO:0003677; C:GO:0005634	F:DNA binding; C:nucleus
g776.t1	KAJ3576108.1hypothetical protein NP233_g672	3	4.14e-208	68.26	1	F:GO:0003676	F:nucleic acid binding
g777.t1	KAF5355876.1hypothetical protein D9756_003812	3	1.43e-116	92.96	16	P:GO:0006886; P:GO:0006896; P:GO:0006906; P:GO:0015031; P:GO:0015833; P:GO:0048278; P:GO:0051321; P:GO:0097576; F:GO:0000149; F:GO:0005484; F:GO:0035091; F:GO:0043168; C:GO:0000329; C:GO:0005770; C:GO:0031201	P:intracellular protein transport; P:Golgi to vacuole transport; P:vesicle fusion; P:protein transport; P:peptide transport; P:vesicle docking; P:meiotic cell cycle; P:vacuole fusion; F:SNARE binding; F:SNAP receptor activity; F:phosphatidylinositol binding; F:anion binding; C:fungal-type vacuole membrane; C:late endosome; C:SNARE complex
g778.t1	KAF5356080.1hypothetical protein D9756_003810	3	1.97e-246	90.77	17	P:GO:0006357; P:GO:0007031; P:GO:0007165; P:GO:0016310; P:GO:0032147; P:GO:0045722; P:GO:0048869; P:GO:0071902; F:GO:0005524; F:GO:0016208; F:GO:0016301; F:GO:0043539; C:GO:0005641; C:GO:0005829; C:GO:0005886; C:GO:0031588	P:regulation of transcription by RNA polymerase II; P:peroxisome organization; P:signal transduction; P:phosphorylation; P:activation of protein kinase activity; P:positive regulation of gluconeogenesis; P:cellular developmental process; P:positive regulation of protein serine/threonine kinase activity; F:ATP binding; F:AMP binding; F:kinase activity; F:protein serine/threonine kinase activator a…	EC:2.7	Transferring phosphorus-containing groups
g779.t1	KAF5356165.1hypothetical protein D9756_003809	3	2.42E-312	80.79	5	P:GO:0015833; P:GO:0043328; P:GO:0044248; C:GO:0005768; C:GO:0005783	P:peptide transport; P:protein transport to vacuole involved in ubiquitin-dependent protein catabolic process via the multivesicular body sorting pathway; P:cellular catabolic process; C:endosome; C:endoplasmic reticulum
g780.t1	KAF5356230.1hypothetical protein D9756_003807	3	0	92.77	13	P:GO:0002181; P:GO:0006422; P:GO:0019752; F:GO:0003676; F:GO:0003723; F:GO:0004815; F:GO:0005524; C:GO:0005634; C:GO:0005737	P:cytoplasmic translation; P:aspartyl-tRNA aminoacylation; P:carboxylic acid metabolic process; F:nucleic acid binding; F:RNA binding; F:aspartate-tRNA ligase activity; F:ATP binding; C:nucleus; C:cytoplasm	EC:6.1.1.12	aspartate--tRNA ligase
g781.t1	KXN89976.1Aspartate aminotransferase, cytoplasmic	3	1.46e-278	93.74	19	P:GO:0006103; P:GO:0006520; P:GO:0006530; P:GO:0006532; P:GO:0006533; P:GO:0006534; P:GO:0006538; P:GO:0009058; P:GO:0009069; P:GO:0019266; P:GO:0043604; P:GO:0048869; P:GO:0072329; P:GO:0072330; F:GO:0004069; F:GO:0030170; C:GO:0005759	P:2-oxoglutarate metabolic process; P:amino acid metabolic process; P:asparagine catabolic process; P:aspartate biosynthetic process; P:aspartate catabolic process; P:cysteine metabolic process; P:glutamate catabolic process; P:biosynthetic process; P:serine family amino acid metabolic process; P:asparagine biosynthetic process from oxaloacetate; P:amide biosynthetic process; P:cellular developme…	EC:2.6.1.1	aspartate transaminase
g782.t1	PPQ64378.1hypothetical protein CVT26_002085	3	0	86.15	18	P:GO:0006414; P:GO:0051701; F:GO:0003723; F:GO:0003746; F:GO:0003924; F:GO:0004672; F:GO:0005524; F:GO:0005525; C:GO:0005737; C:GO:0009986; C:GO:0030445; C:GO:0030446	P:translational elongation; P:biological process involved in interaction with host; F:RNA binding; F:translation elongation factor activity; F:GTPase activity; F:protein kinase activity; F:ATP binding; F:GTP binding; C:cytoplasm; C:cell surface; C:yeast-form cell wall; C:hyphal cell wall	EC:2.7.1; EC:3.6.1.15	Transferring phosphorus-containing groups; nucleoside-triphosphate phosphatase
g783.t1	TFK98860.1ribosomal protein L32e	3	7.11e-65	85.68	7	P:GO:0002181; P:GO:0006412; F:GO:0003735; C:GO:0005840; C:GO:0022625; C:GO:1990904	P:cytoplasmic translation; P:translation; F:structural constituent of ribosome; C:ribosome; C:cytosolic large ribosomal subunit; C:ribonucleoprotein complex
g784.t1	KAF9453775.1hypothetical protein P691DRAFT_771074	3	1.11e-51	56.19	1	F:GO:0003723	F:RNA binding
g785.t1	KAF5347027.1hypothetical protein D9756_011014	3	8.85e-24	50.72	1	F:GO:0003824	F:catalytic activity
g786.t1	KAF5360470.1hypothetical protein D9756_004728	3	9.07e-282	74.91	1	C:GO:0016020	C:membrane
g787.t1	KAF5360476.1hypothetical protein D9756_004727	3	2.13e-147	75.63
g788.t1	KAF5360949.1hypothetical protein D9756_004726	3	4.85e-281	81.37	2	P:GO:0019933; C:GO:0005634	P:cAMP-mediated signaling; C:nucleus
g789.t1	KAJ3566930.1hypothetical protein NP233_g6689	3	0	75.34	19	P:GO:0006811; P:GO:0006874; P:GO:0006914; P:GO:0007035; P:GO:0009987; P:GO:0015988; P:GO:0043248; P:GO:0044419; P:GO:0045851; P:GO:1902906; F:GO:0008553; F:GO:0016887; F:GO:0046961; C:GO:0000221; C:GO:0000329; C:GO:0005886; C:GO:0010494; C:GO:1990816; C:GO:1990904	P:monoatomic ion transport; P:intracellular calcium ion homeostasis; P:autophagy; P:vacuolar acidification; P:cellular process; P:energy coupled proton transmembrane transport, against electrochemical gradient; P:proteasome assembly; P:biological process involved in interspecies interaction between organisms; P:pH reduction; P:proteasome storage granule assembly; F:P-type proton-exporting transpo…	EC:7.1.2.1; EC:7.2.2; EC:3.6.1.15	P-type H(+)-exporting transporter; Catalysing the translocation of inorganic cations; nucleoside-triphosphate phosphatase
g790.t1	KAJ3566929.1hypothetical protein NP233_g6688	3	5.35e-50	58.79	3	P:GO:0030490; C:GO:0005730; C:GO:0030686	P:maturation of SSU-rRNA; C:nucleolus; C:90S preribosome
g792.t1	KAJ3563441.1hypothetical protein NP233_g8939	3	6.05e-242	78.04	11	P:GO:0006364; P:GO:0010501; P:GO:0032042; F:GO:0000166; F:GO:0003724; F:GO:0003824; F:GO:0016887; F:GO:0036121; C:GO:0005730; C:GO:0005759	P:rRNA processing; P:RNA secondary structure unwinding; P:mitochondrial DNA metabolic process; F:nucleotide binding; F:RNA helicase activity; F:catalytic activity; F:ATP hydrolysis activity; F:double-stranded DNA helicase activity; C:nucleolus; C:mitochondrial matrix	EC:3.6.4.13; EC:3.6.1.15	RNA helicase; nucleoside-triphosphate phosphatase
g793.t1	KAF5355714.1hypothetical protein D9756_003724	3	0	73.5	7	P:GO:0001522; P:GO:0006213; P:GO:0008152; P:GO:0016310; F:GO:0003824; F:GO:0004730; F:GO:0050225	P:pseudouridine synthesis; P:pyrimidine nucleoside metabolic process; P:metabolic process; P:phosphorylation; F:catalytic activity; F:pseudouridylate synthase activity; F:pseudouridine kinase activity	EC:4.2.1.70; EC:2.7.1.83	pseudouridylate synthase; pseudouridine kinase
g794.t1	KAJ3563443.1hypothetical protein NP233_g8943	3	7.09e-193	94.69	15	P:GO:0005975; P:GO:0006038; P:GO:0006048; P:GO:0006541; P:GO:0006805; P:GO:0044038; P:GO:0070592; F:GO:0000287; F:GO:0004610; F:GO:0016740	P:carbohydrate metabolic process; P:cell wall chitin biosynthetic process; P:UDP-N-acetylglucosamine biosynthetic process; P:glutamine metabolic process; P:xenobiotic metabolic process; P:cell wall macromolecule biosynthetic process; P:cell wall polysaccharide biosynthetic process; F:magnesium ion binding; F:phosphoacetylglucosamine mutase activity; F:transferase activity	EC:2; EC:5.4.2.3	Transferases; phosphoacetylglucosamine mutase
g795.t1	KAF5355718.1hypothetical protein D9756_003728	3	0	92.05	11	P:GO:0005975; P:GO:0006038; P:GO:0006048; P:GO:0006805; P:GO:0044038; P:GO:0070592; F:GO:0000287; F:GO:0004610	P:carbohydrate metabolic process; P:cell wall chitin biosynthetic process; P:UDP-N-acetylglucosamine biosynthetic process; P:xenobiotic metabolic process; P:cell wall macromolecule biosynthetic process; P:cell wall polysaccharide biosynthetic process; F:magnesium ion binding; F:phosphoacetylglucosamine mutase activity	EC:5.4.2.3	phosphoacetylglucosamine mutase
g796.t1	KAF5355719.1hypothetical protein D9756_003729	3	8.73e-121	69.55	20	P:GO:0006810; P:GO:0006886; P:GO:0006888; P:GO:0006914; P:GO:0009987; P:GO:0015833; P:GO:0032781; P:GO:0035494; P:GO:0042144; P:GO:0048280; P:GO:0051345; F:GO:0001671; F:GO:0005483; F:GO:0008047; F:GO:0019905; F:GO:0060589; C:GO:0000329; C:GO:0005829; C:GO:0019898; C:GO:0031201	P:transport; P:intracellular protein transport; P:endoplasmic reticulum to Golgi vesicle-mediated transport; P:autophagy; P:cellular process; P:peptide transport; P:positive regulation of ATP-dependent activity; P:SNARE complex disassembly; P:vacuole fusion, non-autophagic; P:vesicle fusion with Golgi apparatus; P:positive regulation of hydrolase activity; F:ATPase activator activity; F:soluble N…
g797.t1	KAJ3569773.1hypothetical protein NP233_g4831	3	1.28e-216	82.26
g799.t1	KAF5356083.1hypothetical protein D9756_003731	3	6.92e-189	73.37
g800.t1	KAF5356081.1hypothetical protein D9756_003733	3	5.61e-67	70.55
g801.t1	KAJ3576108.1hypothetical protein NP233_g672	3	2.95e-66	62.51
g802.t1	KAF7776769.1hypothetical protein Agabi119p4_5162	3	6.33e-240	77.21	4	P:GO:0015074; F:GO:0003676; F:GO:0003723; C:GO:0005634	P:DNA integration; F:nucleic acid binding; F:RNA binding; C:nucleus
g804.t1	KAJ3575904.1hypothetical protein NP233_g779	3	0	64.08	10	P:GO:0009272; P:GO:0044419; P:GO:0050765; P:GO:0051042; P:GO:0071236; P:GO:0097308; P:GO:1900231; P:GO:1900445; F:GO:0016740	P:fungal-type cell wall biogenesis; P:biological process involved in interspecies interaction between organisms; P:negative regulation of phagocytosis; P:negative regulation of calcium-independent cell-cell adhesion; P:cellular response to antibiotic; P:cellular response to farnesol; P:regulation of single-species biofilm formation on inanimate substrate; P:positive regulation of filamentous grow…	EC:2	Transferases
g805.t1	KAF5355680.1hypothetical protein D9756_004007	3	2.5e-221	81.86	14	P:GO:0007165; P:GO:0009272; P:GO:0044419; P:GO:0050765; P:GO:0051042; P:GO:0071236; P:GO:0097308; P:GO:1900231; P:GO:1900445; F:GO:0000166; F:GO:0004672	P:signal transduction; P:fungal-type cell wall biogenesis; P:biological process involved in interspecies interaction between organisms; P:negative regulation of phagocytosis; P:negative regulation of calcium-independent cell-cell adhesion; P:cellular response to antibiotic; P:cellular response to farnesol; P:regulation of single-species biofilm formation on inanimate substrate; P:positive regulat…	EC:2.7.1	Transferring phosphorus-containing groups
g806.t1	KAJ3575905.1hypothetical protein NP233_g778	3	1.02e-252	92.83	46	P:GO:0000122; P:GO:0006260; P:GO:0006325; P:GO:0006977; P:GO:0007089; P:GO:0007099; P:GO:0007265; P:GO:0007275; P:GO:0008284; P:GO:0010033; P:GO:0010389; P:GO:0010629; P:GO:0010906; P:GO:0016239; P:GO:0016242; P:GO:0018105; P:GO:0031328; P:GO:0031505; P:GO:0031647; P:GO:0032878; P:GO:0032880; P:GO:0034614; P:GO:0043433; P:GO:0045719; P:GO:0045936; P:GO:0050849; P:GO:0051276; P:GO:0051321; P:GO:00…	P:negative regulation of transcription by RNA polymerase II; P:DNA replication; P:chromatin organization; P:DNA damage response, signal transduction by p53 class mediator resulting in cell cycle arrest; P:traversing start control point of mitotic cell cycle; P:centriole replication; P:Ras protein signal transduction; P:multicellular organism development; P:positive regulation of cell population p…	EC:2.7.11.1; EC:2.7.11.22	non-specific serine/threonine protein kinase; cyclin-dependent kinase
g807.t1	KAF5355679.1hypothetical protein D9756_004005	3	5e-151	87.03	9	P:GO:0000462; P:GO:0010628; P:GO:0045943; F:GO:0030515; F:GO:1901363; C:GO:0005730; C:GO:0032040; C:GO:0033553; C:GO:0034455	P:maturation of SSU-rRNA from tricistronic rRNA transcript (SSU-rRNA, 5.8S rRNA, LSU-rRNA); P:positive regulation of gene expression; P:positive regulation of transcription by RNA polymerase I; F:snoRNA binding; F:heterocyclic compound binding; C:nucleolus; C:small-subunit processome; C:rDNA heterochromatin; C:t-UTP complex
g808.t1	KAJ3575910.1hypothetical protein NP233_g776	3	5.51e-43	88.12	12	P:GO:0006284; F:GO:0003684; F:GO:0003906; F:GO:0008270; F:GO:0016829; F:GO:0019104	P:base-excision repair; F:damaged DNA binding; F:DNA-(apurinic or apyrimidinic site) endonuclease activity; F:zinc ion binding; F:lyase activity; F:DNA N-glycosylase activity	EC:4; EC:3.2.2	Lyases; Glycosylases
g809.t1	KAF5361083.1hypothetical protein D9756_004875	3	1.37e-180	95.73
g810.t1	KAF5361081.1hypothetical protein D9756_004873	3	0	72.27	8	P:GO:0000027; P:GO:0006364; F:GO:0005509; F:GO:0016887; C:GO:0005634; C:GO:0005654; C:GO:0005739; C:GO:0030687	P:ribosomal large subunit assembly; P:rRNA processing; F:calcium ion binding; F:ATP hydrolysis activity; C:nucleus; C:nucleoplasm; C:mitochondrion; C:preribosome, large subunit precursor	EC:3.6.1.15	nucleoside-triphosphate phosphatase
g811.t1	KAF5361081.1hypothetical protein D9756_004873	3	0	88.34	14	P:GO:0000027; P:GO:0006364; F:GO:0005509; F:GO:0005524; F:GO:0016887; C:GO:0005654; C:GO:0005730; C:GO:0005739; C:GO:0030687	P:ribosomal large subunit assembly; P:rRNA processing; F:calcium ion binding; F:ATP binding; F:ATP hydrolysis activity; C:nucleoplasm; C:nucleolus; C:mitochondrion; C:preribosome, large subunit precursor	EC:3.6.1.15	nucleoside-triphosphate phosphatase
g812.t1	KAG6913243.1hypothetical protein DXG01_008453	3	3.09e-30	62.44	3	F:GO:0003676; F:GO:0008270; C:GO:0005634	F:nucleic acid binding; F:zinc ion binding; C:nucleus
g813.t1	KAF5350717.1hypothetical protein D9756_008603	3	1.73e-100	72.17	2	P:GO:0006511; F:GO:0031625	P:ubiquitin-dependent protein catabolic process; F:ubiquitin protein ligase binding
g814.t1	XP_007331904.1hypothetical protein AGABI1DRAFT_93368	3	1.73e-52	70.64	3	F:GO:0003676; F:GO:0008270; C:GO:0005634	F:nucleic acid binding; F:zinc ion binding; C:nucleus
g816.t1	KAF5360975.1hypothetical protein D9756_004486	3	8.04e-46	62.59	3	F:GO:0003676; F:GO:0008270; C:GO:0005634	F:nucleic acid binding; F:zinc ion binding; C:nucleus
g818.t1	ESK87499.1hypothetical protein Moror_10911	3	1.12e-44	67.15	1	C:GO:0016020	C:membrane
g819.t1	KIM59128.1hypothetical protein SCLCIDRAFT_27557	3	9.62e-36	91.54	1	F:GO:0003676	F:nucleic acid binding
g822.t1	KAF5345808.1hypothetical protein D9756_010888	3	9.96e-152	81.16	12	P:GO:0000122; P:GO:0000742; P:GO:0008152; P:GO:0010628; P:GO:0010629; P:GO:0044703; P:GO:0045944; P:GO:0051321; P:GO:0071444; F:GO:0003700; C:GO:0005634; C:GO:0005829	P:negative regulation of transcription by RNA polymerase II; P:karyogamy involved in conjugation with cellular fusion; P:metabolic process; P:positive regulation of gene expression; P:negative regulation of gene expression; P:multi-organism reproductive process; P:positive regulation of transcription by RNA polymerase II; P:meiotic cell cycle; P:cellular response to pheromone; F:DNA-binding trans…
g823.t1	KAJ3572782.1hypothetical protein NP233_g2852	3	0	70.75	2	F:GO:0000166; F:GO:0003824	F:nucleotide binding; F:catalytic activity
g824.t1	KXN92694.1DNA-directed RNA polymerase III subunit RPC2, partial	3	0	92.96	13	P:GO:0006351; P:GO:0042797; F:GO:0003677; F:GO:0003899; F:GO:0032549; F:GO:0046872; C:GO:0000428; C:GO:0005654; C:GO:0005666	P:DNA-templated transcription; P:tRNA transcription by RNA polymerase III; F:DNA binding; F:DNA-directed 5'-3' RNA polymerase activity; F:ribonucleoside binding; F:metal ion binding; C:DNA-directed RNA polymerase complex; C:nucleoplasm; C:RNA polymerase III complex	EC:2.7.7.6	DNA-directed RNA polymerase
g825.t1	KAJ3572788.1hypothetical protein NP233_g2854	3	5.86e-70	83.86	15	P:GO:0000209; P:GO:0010620; P:GO:0030466; P:GO:0031505; P:GO:0036503; P:GO:0044248; P:GO:0051276; F:GO:0005524; F:GO:0016740; F:GO:0031625; F:GO:0061630; F:GO:0061631; C:GO:0000837; C:GO:0000839	P:protein polyubiquitination; P:negative regulation of transcription by transcription factor catabolism; P:silent mating-type cassette heterochromatin formation; P:fungal-type cell wall organization; P:ERAD pathway; P:cellular catabolic process; P:chromosome organization; F:ATP binding; F:transferase activity; F:ubiquitin protein ligase binding; F:ubiquitin protein ligase activity; F:ubiquitin co…	EC:2.3.2.23	E2 ubiquitin-conjugating enzyme
g826.t1	KXN85894.1(S)-2-haloacid dehalogenase 4A	3	6.43e-128	79.57	1	F:GO:0019120	F:hydrolase activity, acting on acid halide bonds, in C-halide compounds
g827.t1	KAJ3574027.1hypothetical protein NP233_g2051	3	6.63e-124	93.43	3	P:GO:0006357; F:GO:0003712; C:GO:0016592	P:regulation of transcription by RNA polymerase II; F:transcription coregulator activity; C:mediator complex
g828.t1	KAF5352345.1hypothetical protein D9756_006036	3	5.69e-153	61.76	1	C:GO:0016020	C:membrane
g829.t1	KAF5352344.1hypothetical protein D9756_006037	3	9.11e-300	93.72	10	P:GO:0000338; P:GO:0043161; P:GO:0044248; F:GO:0005515; C:GO:0000502; C:GO:0008180; C:GO:0008541; C:GO:0031595; C:GO:0031597; C:GO:0034515	P:protein deneddylation; P:proteasome-mediated ubiquitin-dependent protein catabolic process; P:cellular catabolic process; F:protein binding; C:proteasome complex; C:COP9 signalosome; C:proteasome regulatory particle, lid subcomplex; C:nuclear proteasome complex; C:cytosolic proteasome complex; C:proteasome storage granule
g830.t1	KAF5352434.1hypothetical protein D9756_006038	3	0	78.01	1	C:GO:0016020	C:membrane
g831.t1	KAJ3574030.1hypothetical protein NP233_g2047	3	1.06e-189	66.07	4	P:GO:0006260; P:GO:0006270; P:GO:0007049; C:GO:0005634	P:DNA replication; P:DNA replication initiation; P:cell cycle; C:nucleus
g832.t1	KAF5352781.1hypothetical protein D9756_006040	3	2.36e-209	60.75
g833.t1	KAF5352782.1hypothetical protein D9756_006041	3	9.9e-125	52.13
g834.t1	KAF5347027.1hypothetical protein D9756_011014	3	2.15e-38	56.86	1	F:GO:0003824	F:catalytic activity
g835.t1	KAF5348883.1hypothetical protein D9756_009792	3	2.18e-63	67.55	1	C:GO:0016020	C:membrane
g836.t1	KAF5360740.1hypothetical protein D9756_005099	3	1.39e-277	79.38	1	F:GO:0046872	F:metal ion binding
g837.t1	KAJ3562051.1hypothetical protein NP233_g9817	3	0	86.89	4	P:GO:0006508; F:GO:0070008	P:proteolysis; F:serine-type exopeptidase activity	EC:3.4	Acting on peptide bonds (peptidases)
g838.t1	KAF5360334.1hypothetical protein D9756_005093	3	4.11e-217	66.42	5	P:GO:0000463; F:GO:0003723; F:GO:1901363; C:GO:0005730; C:GO:0030687	P:maturation of LSU-rRNA from tricistronic rRNA transcript (SSU-rRNA, 5.8S rRNA, LSU-rRNA); F:RNA binding; F:heterocyclic compound binding; C:nucleolus; C:preribosome, large subunit precursor
g839.t1	KAF5360741.1hypothetical protein D9756_005094	3	2.4e-77	85.69	3	P:GO:0055085; F:GO:0022857; C:GO:0016020	P:transmembrane transport; F:transmembrane transporter activity; C:membrane
g840.t1	KAF5360342.1hypothetical protein D9756_005085	3	2.51e-88	74.83
g841.t1	KAF5360341.1hypothetical protein D9756_005086	3	1.24e-249	81.18	2	F:GO:0016491; F:GO:0046872	F:oxidoreductase activity; F:metal ion binding	EC:1	Oxidoreductases
g842.t1	KAF5360745.1hypothetical protein D9756_005091	3	1.25e-236	88.48
g843.t1	KAF5345227.1hypothetical protein D9756_011486	3	2.2e-33	66.82	4	F:GO:0003676; F:GO:0008270; C:GO:0005634; C:GO:0016020	F:nucleic acid binding; F:zinc ion binding; C:nucleus; C:membrane
g844.t1	KAF8993097.1hypothetical protein BDQ17DRAFT_162108	3	7.68e-164	56.88
g845.t1	KAF8993098.1hypothetical protein BDQ17DRAFT_1312515	3	5.26e-279	73.62
g846.t1	KAF8993099.1aromatic prenyltransferase	3	1.27e-190	73.2	5	P:GO:0006508; P:GO:0009821; P:GO:0044271; F:GO:0004161; F:GO:0008233	P:proteolysis; P:alkaloid biosynthetic process; P:cellular nitrogen compound biosynthetic process; F:dimethylallyltranstransferase activity; F:peptidase activity	EC:3.4; EC:2.5.1.1	Acting on peptide bonds (peptidases); dimethylallyltranstransferase
g847.t1	KAF8993101.1cytochrome P450, partial	3	4.7e-98	59.09	7	F:GO:0004497; F:GO:0005506; F:GO:0016491; F:GO:0016705; F:GO:0020037; F:GO:0046872; C:GO:0016020	F:monooxygenase activity; F:iron ion binding; F:oxidoreductase activity; F:oxidoreductase activity, acting on paired donors, with incorporation or reduction of molecular oxygen; F:heme binding; F:metal ion binding; C:membrane
g848.t1	KAF8993100.1hypothetical protein BDQ17DRAFT_1368779	3	1.89e-182	66.71	3	F:GO:0016491; F:GO:0050660; F:GO:0071949	F:oxidoreductase activity; F:flavin adenine dinucleotide binding; F:FAD binding
g849.t1	KAF8993102.1cytochrome P450	3	8.35e-249	71.15	2	F:GO:0005488; F:GO:0016491	F:binding; F:oxidoreductase activity	EC:1	Oxidoreductases
g850.t1	KAF8993095.1hypothetical protein BDQ17DRAFT_1368771	3	2.41e-186	73.41	5	P:GO:1901576; F:GO:0016491; F:GO:0050660; F:GO:0071949; C:GO:0005575	P:organic substance biosynthetic process; F:oxidoreductase activity; F:flavin adenine dinucleotide binding; F:FAD binding; C:cellular_component
g851.t1	KXN90379.1hypothetical protein AN958_04248	3	4.34e-163	71.6	1	P:GO:0005975	P:carbohydrate metabolic process
g852.t1	KXN90378.1Mitochondrial organizing structure protein 2	3	1.71e-76	77.62	5	P:GO:0042407; C:GO:0044284; C:GO:0061617	P:cristae formation; C:mitochondrial crista junction; C:MICOS complex
g853.t1	KAJ3575190.1hypothetical protein NP233_g1262	3	0	79.63	5	P:GO:0034975; P:GO:0051641; P:GO:1990456; C:GO:0005789; C:GO:0072546	P:protein folding in endoplasmic reticulum; P:cellular localization; P:mitochondrion-endoplasmic reticulum membrane tethering; C:endoplasmic reticulum membrane; C:EMC complex
g854.t1	KAF5353468.1hypothetical protein D9756_007939	3	0	63.66	12	P:GO:0006357; P:GO:0010628; P:GO:0031627; P:GO:0060249; P:GO:0061586; P:GO:0065008; F:GO:0003691; F:GO:0140110; F:GO:1901363; C:GO:0000228; C:GO:0000783; C:GO:0000785	P:regulation of transcription by RNA polymerase II; P:positive regulation of gene expression; P:telomeric loop formation; P:anatomical structure homeostasis; P:positive regulation of transcription by transcription factor localization; P:regulation of biological quality; F:double-stranded telomeric DNA binding; F:transcription regulator activity; F:heterocyclic compound binding; C:nuclear chromoso…
g855.t1	KAF5353297.1hypothetical protein D9756_007940	3	3.23e-221	85.48	12	P:GO:0031331; P:GO:0032436; P:GO:0043248; P:GO:0045842; P:GO:0051781; P:GO:0062033; F:GO:0005198; C:GO:0000502; C:GO:0005634; C:GO:0008541; C:GO:0031597; C:GO:0034515	P:positive regulation of cellular catabolic process; P:positive regulation of proteasomal ubiquitin-dependent protein catabolic process; P:proteasome assembly; P:positive regulation of mitotic metaphase/anaphase transition; P:positive regulation of cell division; P:positive regulation of mitotic sister chromatid segregation; F:structural molecule activity; C:proteasome complex; C:nucleus; C:prote…
g856.t1	KAF8308880.1WD40 repeat-like protein	3	0	56.7
g857.t1	KAF5356759.1hypothetical protein D9756_006729	3	1.95e-95	66.09
g858.t1	KAF5356760.1hypothetical protein D9756_006728	3	0	96.6	18	P:GO:0003400; P:GO:0006886; P:GO:0016236; P:GO:0043547; P:GO:0048209; P:GO:0060628; P:GO:0090114; F:GO:0005096; F:GO:0008270; C:GO:0000139; C:GO:0005789; C:GO:0030127; C:GO:0030660	P:regulation of COPII vesicle coating; P:intracellular protein transport; P:macroautophagy; P:positive regulation of GTPase activity; P:regulation of vesicle targeting, to, from or within Golgi; P:regulation of ER to Golgi vesicle-mediated transport; P:COPII-coated vesicle budding; F:GTPase activator activity; F:zinc ion binding; C:Golgi membrane; C:endoplasmic reticulum membrane; C:COPII vesicle…
g859.t1	KAF5356761.1hypothetical protein D9756_006727	3	0	78.7	2	P:GO:0015833; P:GO:0055085	P:peptide transport; P:transmembrane transport
g860.t1	KAF9446476.1hypothetical protein P691DRAFT_733167	3	1.72e-259	79.03
g861.t1	KAJ3563239.1hypothetical protein NP233_g9067	3	1.08e-34	41.4	2	P:GO:0005975; F:GO:0004553	P:carbohydrate metabolic process; F:hydrolase activity, hydrolyzing O-glycosyl compounds
g862.t1	KAF5348904.1hypothetical protein D9756_009819	3	9.33e-274	89.22
g863.t1	KAF5348828.1hypothetical protein D9756_009829	3	1.85e-160	56.28	1	C:GO:0005622	C:intracellular anatomical structure
g864.t1	KAF5348899.1hypothetical protein D9756_009857	3	2.9e-172	73.26	8	P:GO:0000154; P:GO:0030490; F:GO:0030515; F:GO:1901363; C:GO:0005730; C:GO:0030686; C:GO:0031428; C:GO:0032040	P:rRNA modification; P:maturation of SSU-rRNA; F:snoRNA binding; F:heterocyclic compound binding; C:nucleolus; C:90S preribosome; C:box C/D methylation guide snoRNP complex; C:small-subunit processome
g865.t1	KAF5348760.1hypothetical protein D9756_009858	3	3.6e-288	87.67	11	P:GO:0006805; P:GO:0009058; P:GO:0042853; P:GO:0065008; P:GO:0097054; F:GO:0004021; F:GO:0008483; F:GO:0030170; C:GO:0005739	P:xenobiotic metabolic process; P:biosynthetic process; P:L-alanine catabolic process; P:regulation of biological quality; P:L-glutamate biosynthetic process; F:L-alanine:2-oxoglutarate aminotransferase activity; F:transaminase activity; F:pyridoxal phosphate binding; C:mitochondrion	EC:2.6.1.12; EC:2.6.1.2	alanine--oxo-acid transaminase; alanine transaminase
g866.t1	KXN91185.1hypothetical protein AN958_02753	3	2.46e-34	68.38
g867.t1	KXN88290.1Exoglucanase 1	3	3.75e-186	88.37	3	P:GO:0005975; F:GO:0030248; C:GO:0005576	P:carbohydrate metabolic process; F:cellulose binding; C:extracellular region
g868.t1	KAF5360358.1hypothetical protein D9756_004689	3	9.09e-97	87.29	17	P:GO:0006801; P:GO:0006878; P:GO:0006882; P:GO:0010106; P:GO:0019430; P:GO:0034599; P:GO:0045454; P:GO:0050794; P:GO:0065008; F:GO:0004784; F:GO:0005507; F:GO:0008270; F:GO:0016491; F:GO:0046872; C:GO:0005615; C:GO:0005758; C:GO:0005829	P:superoxide metabolic process; P:intracellular copper ion homeostasis; P:intracellular zinc ion homeostasis; P:cellular response to iron ion starvation; P:removal of superoxide radicals; P:cellular response to oxidative stress; P:cell redox homeostasis; P:regulation of cellular process; P:regulation of biological quality; F:superoxide dismutase activity; F:copper ion binding; F:zinc ion binding;…	EC:1.15.1.1	superoxide dismutase
g869.t1	KAF9452974.1PapD-like protein	3	8.65e-131	69.47	20	P:GO:0007163; P:GO:0008654; P:GO:0031509; P:GO:0032377; P:GO:0045892; P:GO:0048309; P:GO:0051685; P:GO:0060304; P:GO:0061163; P:GO:0061817; P:GO:0065008; P:GO:0090158; F:GO:0033149; F:GO:0035091; F:GO:0043168; C:GO:0005789; C:GO:0005886; C:GO:0005934; C:GO:0031965; C:GO:0071561	P:establishment or maintenance of cell polarity; P:phospholipid biosynthetic process; P:subtelomeric heterochromatin formation; P:regulation of intracellular lipid transport; P:negative regulation of DNA-templated transcription; P:endoplasmic reticulum inheritance; P:maintenance of ER location; P:regulation of phosphatidylinositol dephosphorylation; P:endoplasmic reticulum polarization; P:endopla…
g870.t1	KAF5363926.1hypothetical protein D9756_000474	3	8.48e-117	94.94	5	P:GO:0006412; F:GO:0003735; F:GO:0019843; C:GO:0005840; C:GO:1990904	P:translation; F:structural constituent of ribosome; F:rRNA binding; C:ribosome; C:ribonucleoprotein complex
g871.t1	KAF5363928.1hypothetical protein D9756_000476	3	0	89.69	14	P:GO:0000002; P:GO:0032790; P:GO:0032988; P:GO:0051881; P:GO:0070125; F:GO:0003723; F:GO:0003746; F:GO:0003924; F:GO:0005525; F:GO:0032550; C:GO:0005739; C:GO:0005829	P:mitochondrial genome maintenance; P:ribosome disassembly; P:protein-RNA complex disassembly; P:regulation of mitochondrial membrane potential; P:mitochondrial translational elongation; F:RNA binding; F:translation elongation factor activity; F:GTPase activity; F:GTP binding; F:purine ribonucleoside binding; C:mitochondrion; C:cytosol	EC:3.6.1.15	nucleoside-triphosphate phosphatase
g872.t1	KAJ3515455.1hypothetical protein NLJ89_g1746	3	1.04e-196	69.68	4	F:GO:0016491; F:GO:0046872	F:oxidoreductase activity; F:metal ion binding	EC:1	Oxidoreductases
g873.t1	KAJ3568604.1hypothetical protein NP233_g5599	3	0	76.56	23	P:GO:0006534; P:GO:0006805; P:GO:0009086; P:GO:0019280; P:GO:0032259; P:GO:0034605; P:GO:0044416; P:GO:0046084; P:GO:0046148; P:GO:0050667; F:GO:0003871; F:GO:0008270; F:GO:0008705; C:GO:0005576; C:GO:0005634; C:GO:0005829; C:GO:0005886; C:GO:0009986; C:GO:0030446; C:GO:0062040	P:cysteine metabolic process; P:xenobiotic metabolic process; P:methionine biosynthetic process; P:L-methionine biosynthetic process from homoserine via O-acetyl-L-homoserine and cystathionine; P:methylation; P:cellular response to heat; P:obsolete induction by symbiont of host defense response; P:adenine biosynthetic process; P:pigment biosynthetic process; P:homocysteine metabolic process; F:5-…	EC:2.1.1.13; EC:2.1.1.14	methionine synthase; 5-methyltetrahydropteroyltriglutamate--homocysteine S-methyltransferase
g874.t1	KAJ3568605.1hypothetical protein NP233_g5598	3	2.79e-257	70.53	8	P:GO:0000719; P:GO:0000956; F:GO:0003729; F:GO:0003904; F:GO:1901363; C:GO:0005634; C:GO:0005739	P:photoreactive repair; P:nuclear-transcribed mRNA catabolic process; F:mRNA binding; F:deoxyribodipyrimidine photo-lyase activity; F:heterocyclic compound binding; C:nucleus; C:mitochondrion	EC:4.1.99.3	deoxyribodipyrimidine photo-lyase
g875.t1	KAF5364202.1hypothetical protein D9756_000485	3	1.3e-86	76.41
g876.t1	KAJ3564872.1hypothetical protein NP233_g8009	3	1.88e-275	95.98	25	P:GO:0006749; P:GO:0010731; P:GO:0034599; P:GO:0034641; P:GO:0045454; P:GO:0050794; P:GO:0065008; P:GO:0098869; F:GO:0004362; F:GO:0015035; F:GO:0016651; F:GO:0050660; F:GO:0050661; F:GO:0140907; C:GO:0005634; C:GO:0005737; C:GO:0005739; C:GO:0005829	P:glutathione metabolic process; P:protein glutathionylation; P:cellular response to oxidative stress; P:cellular nitrogen compound metabolic process; P:cell redox homeostasis; P:regulation of cellular process; P:regulation of biological quality; P:cellular oxidant detoxification; F:glutathione-disulfide reductase (NADPH) activity; F:protein-disulfide reductase activity; F:oxidoreductase activity…	EC:1.6; EC:1.14; EC:1.8.1.7	Acting on NADH or NADPH; Acting on paired donors, with incorporation or reduction of molecular oxygen. The oxygen incorporated need not be derived from O2; glutathione-disulfide reductase
g877.t1	KAF5358507.1hypothetical protein D9756_001962	3	0	85.3	12	P:GO:0006979; P:GO:0042744; P:GO:0098869; F:GO:0004096; F:GO:0020037; F:GO:0046872	P:response to oxidative stress; P:hydrogen peroxide catabolic process; P:cellular oxidant detoxification; F:catalase activity; F:heme binding; F:metal ion binding	EC:1.11.1.6	catalase
g878.t1	KAF9448890.1translation release factor	3	1.91e-294	97.1	12	P:GO:0002184; P:GO:0006353; P:GO:0006415; F:GO:0003747; F:GO:0005515; F:GO:0016149; F:GO:1901363; F:GO:1990825; C:GO:0005737; C:GO:0010494; C:GO:0018444; C:GO:1990904	P:cytoplasmic translational termination; P:DNA-templated transcription termination; P:translational termination; F:translation release factor activity; F:protein binding; F:translation release factor activity, codon specific; F:heterocyclic compound binding; F:sequence-specific mRNA binding; C:cytoplasm; C:cytoplasmic stress granule; C:translation release factor complex; C:ribonucleoprotein compl…
g879.t1	KAF5358137.1hypothetical protein D9756_001958	3	8.47e-259	89.03	1	F:GO:0016491	F:oxidoreductase activity	EC:1	Oxidoreductases
g880.t1	KAF5358143.1hypothetical protein D9756_001957	3	4e-256	91.73	1	F:GO:0016491	F:oxidoreductase activity	EC:1	Oxidoreductases
g881.t1	KXN82625.1hypothetical protein AN958_02476	3	0	76.96	1	F:GO:0016787	F:hydrolase activity	EC:3	Hydrolases
g882.t1	KAJ2926348.1hypothetical protein H1R20_g10741, partial	3	3.67e-189	87.4	7	P:GO:0045292; F:GO:0003723; F:GO:1901363; C:GO:0005634; C:GO:0005686; C:GO:0071004	P:mRNA cis splicing, via spliceosome; F:RNA binding; F:heterocyclic compound binding; C:nucleus; C:U2 snRNP; C:U2-type prespliceosome
g883.t1	KXN86292.154S ribosomal protein L12, mitochondrial, partial	3	1.02e-67	83.88	10	P:GO:0006412; P:GO:0032543; F:GO:0003735; C:GO:0005762; C:GO:0005840; C:GO:0016020; C:GO:0042645; C:GO:1990904	P:translation; P:mitochondrial translation; F:structural constituent of ribosome; C:mitochondrial large ribosomal subunit; C:ribosome; C:membrane; C:mitochondrial nucleoid; C:ribonucleoprotein complex
g884.t1	KAF5363734.1hypothetical protein D9756_000607	3	0	80.58	17	P:GO:0000289; P:GO:0000290; P:GO:0006355; P:GO:0010628; P:GO:0016567; P:GO:0017148; P:GO:0031087; P:GO:0032968; F:GO:0005515; C:GO:0000932; C:GO:0005634; C:GO:0030015; C:GO:1990904	P:nuclear-transcribed mRNA poly(A) tail shortening; P:deadenylation-dependent decapping of nuclear-transcribed mRNA; P:regulation of DNA-templated transcription; P:positive regulation of gene expression; P:protein ubiquitination; P:negative regulation of translation; P:deadenylation-independent decapping of nuclear-transcribed mRNA; P:positive regulation of transcription elongation by RNA polymer…
g885.t1	KAJ3569352.1hypothetical protein NP233_g5106	3	0	81.46	21	P:GO:0000753; P:GO:0007265; P:GO:0032488; P:GO:0032989; P:GO:0044703; P:GO:0048869; P:GO:0051128; P:GO:2000769; F:GO:0005198; F:GO:0005515; F:GO:0030674; F:GO:0032266; F:GO:0043168; C:GO:0000131; C:GO:0005739; C:GO:0005934; C:GO:0005935; C:GO:0043332; C:GO:0071521; C:GO:0090726; C:GO:0099568	P:cell morphogenesis involved in conjugation with cellular fusion; P:Ras protein signal transduction; P:Cdc42 protein signal transduction; P:cellular anatomical entity morphogenesis; P:multi-organism reproductive process; P:cellular developmental process; P:regulation of cellular component organization; P:regulation of establishment or maintenance of cell polarity regulating cell shape; F:structu…
g886.t1	KXN86295.1NADH dehydrogenase [ubiquinone] 1 alpha subcomplex subunit 12	3	9.19e-93	96.37	6	P:GO:0006979; P:GO:0032981; C:GO:0005743; C:GO:0005747; C:GO:0070469	P:response to oxidative stress; P:mitochondrial respiratory chain complex I assembly; C:mitochondrial inner membrane; C:mitochondrial respiratory chain complex I; C:respirasome
g887.t1	KAJ3569350.1hypothetical protein NP233_g5104	3	5.72e-205	82.83	2	F:GO:0140907	F:flavin-dependent halogenase activity	EC:1.14	Acting on paired donors, with incorporation or reduction of molecular oxygen. The oxygen incorporated need not be derived from O2
g888.t1	KAJ3569355.1hypothetical protein NP233_g5102	3	1.44e-108	90.93	11	P:GO:0002181; P:GO:0006364; P:GO:0006412; P:GO:0042274; F:GO:0003735; C:GO:0005840; C:GO:0022627; C:GO:0030686; C:GO:0032040; C:GO:1990904	P:cytoplasmic translation; P:rRNA processing; P:translation; P:ribosomal small subunit biogenesis; F:structural constituent of ribosome; C:ribosome; C:cytosolic small ribosomal subunit; C:90S preribosome; C:small-subunit processome; C:ribonucleoprotein complex
g889.t1	KAF5363740.1hypothetical protein D9756_000601	3	6.67e-177	78.23	2	F:GO:0003924; F:GO:0005525	F:GTPase activity; F:GTP binding
g890.t1	KAF9451990.1hypothetical protein P691DRAFT_661764	3	2.48e-139	75.22
g891.t1	KAF5363608.1hypothetical protein D9756_000598	3	1.75e-269	97.34	13	P:GO:0000027; P:GO:0002181; P:GO:0006364; P:GO:0006412; P:GO:1990145; F:GO:0003723; F:GO:0003735; F:GO:1901363; C:GO:0005840; C:GO:0022625; C:GO:0030687; C:GO:1990904	P:ribosomal large subunit assembly; P:cytoplasmic translation; P:rRNA processing; P:translation; P:maintenance of translational fidelity; F:RNA binding; F:structural constituent of ribosome; F:heterocyclic compound binding; C:ribosome; C:cytosolic large ribosomal subunit; C:preribosome, large subunit precursor; C:ribonucleoprotein complex
g892.t1	KAF5359640.1hypothetical protein D9756_003447	3	2.92e-81	77.03	1	F:GO:0005525	F:GTP binding
g893.t1	KAF5359873.1hypothetical protein D9756_003450	3	8.48e-109	67.82	3	P:GO:0055085; F:GO:0022857; C:GO:0016020	P:transmembrane transport; F:transmembrane transporter activity; C:membrane
g894.t1	CDJ79817.1endocellulase precursor	3	3.63e-283	91.97	8	P:GO:0005975; F:GO:0004553; F:GO:0030248; C:GO:0005576	P:carbohydrate metabolic process; F:hydrolase activity, hydrolyzing O-glycosyl compounds; F:cellulose binding; C:extracellular region	EC:3.2.1	Glycosylases
g895.t1	KXN84736.1hypothetical protein AN958_12163	3	0	79.4	10	P:GO:0006811; P:GO:0006857; P:GO:0055085; F:GO:0022857; C:GO:0000329; C:GO:0005783; C:GO:0005886; C:GO:0016020	P:monoatomic ion transport; P:oligopeptide transport; P:transmembrane transport; F:transmembrane transporter activity; C:fungal-type vacuole membrane; C:endoplasmic reticulum; C:plasma membrane; C:membrane
g896.t1	KXN90061.1RNA-binding protein rsd1	3	0	77.16	8	P:GO:0006397; P:GO:0045292; F:GO:0003723; F:GO:1901363; F:GO:1990446; C:GO:0005634; C:GO:0005681	P:mRNA processing; P:mRNA cis splicing, via spliceosome; F:RNA binding; F:heterocyclic compound binding; F:U1 snRNP binding; C:nucleus; C:spliceosomal complex
g897.t1	KAF5355671.1hypothetical protein D9756_003741	3	5.48e-91	70.18	2	P:GO:0031047; C:GO:0033167	P:regulatory ncRNA-mediated gene silencing; C:ARC complex
g898.t1	KAJ3569765.1hypothetical protein NP233_g4843	3	4.33e-117	75.97	1	C:GO:0016020	C:membrane
g900.t1	KAF5355669.1hypothetical protein D9756_003743	3	2.2e-111	72.62	1	C:GO:0016020	C:membrane
g901.t1	KAF5355674.1hypothetical protein D9756_003744	3	1.12e-259	78.71	3	P:GO:0051072; F:GO:0047220; C:GO:0005794	P:4,6-pyruvylated galactose residue biosynthetic process; F:galactosylxylosylprotein 3-beta-galactosyltransferase activity; C:Golgi apparatus	EC:2.4.1.134	galactosylxylosylprotein 3-beta-galactosyltransferase
g902.t1	KAJ3558951.1hypothetical protein NP233_g11386	3	5.31e-110	88.92	9	P:GO:0006457; P:GO:0019933; P:GO:0051382; F:GO:0030674; F:GO:0051087; C:GO:0000151; C:GO:0005634; C:GO:0005737	P:protein folding; P:cAMP-mediated signaling; P:kinetochore assembly; F:protein-macromolecule adaptor activity; F:protein-folding chaperone binding; C:ubiquitin ligase complex; C:nucleus; C:cytoplasm
g903.t1	KAF5355673.1hypothetical protein D9756_003747	3	2.56e-111	84.03	6	P:GO:0043604; P:GO:0044237; P:GO:0046394; P:GO:0046452; P:GO:0046654; F:GO:0004146	P:amide biosynthetic process; P:cellular metabolic process; P:carboxylic acid biosynthetic process; P:dihydrofolate metabolic process; P:tetrahydrofolate biosynthetic process; F:dihydrofolate reductase activity	EC:1.5.1.3	dihydrofolate reductase
g905.t1	KXN85326.140S ribosomal protein S8-A	3	1.31e-128	94.34	4	P:GO:0006412; F:GO:0003735; C:GO:0005840; C:GO:1990904	P:translation; F:structural constituent of ribosome; C:ribosome; C:ribonucleoprotein complex
g906.t1	KAF5354937.1hypothetical protein D9756_005409	3	0	95.75	13	P:GO:0005978; P:GO:0005992; P:GO:0006011; P:GO:0006078; P:GO:0006486; F:GO:0003983; C:GO:0005886; C:GO:0009986; C:GO:0010494; C:GO:0030445; C:GO:1990904	P:glycogen biosynthetic process; P:trehalose biosynthetic process; P:UDP-glucose metabolic process; P:(1->6)-beta-D-glucan biosynthetic process; P:protein glycosylation; F:UTP:glucose-1-phosphate uridylyltransferase activity; C:plasma membrane; C:cell surface; C:cytoplasmic stress granule; C:yeast-form cell wall; C:ribonucleoprotein complex	EC:2.7.7.64; EC:2.7.7.9	UTP-monosaccharide-1-phosphate uridylyltransferase; UTP--glucose-1-phosphate uridylyltransferase
g907.t1	TFK26471.1nuclear mRNA splicing protein	3	1.19e-123	77.61	1	P:GO:0045292	P:mRNA cis splicing, via spliceosome
g908.t1	KAF5355204.1hypothetical protein D9756_005414	3	1.07e-31	75.13	1	P:GO:0031146	P:SCF-dependent proteasomal ubiquitin-dependent protein catabolic process
g909.t1	KAF5355206.1hypothetical protein D9756_005416	3	4.81e-167	71.15
g910.t1	KAF5355207.1hypothetical protein D9756_005417	3	3.54e-220	77.5
g911.t1	KAF9447200.1ribosomal protein S7	3	9.89e-133	99.34	19	P:GO:0000028; P:GO:0002181; P:GO:0006412; P:GO:0006450; P:GO:0006611; P:GO:0015833; P:GO:0031503; P:GO:0051029; P:GO:0071166; P:GO:0097064; F:GO:0003723; F:GO:0003729; F:GO:0003735; F:GO:0019843; F:GO:1901363; C:GO:0015935; C:GO:0022627; C:GO:0030686	P:ribosomal small subunit assembly; P:cytoplasmic translation; P:translation; P:regulation of translational fidelity; P:protein export from nucleus; P:peptide transport; P:protein-containing complex localization; P:rRNA transport; P:ribonucleoprotein complex localization; P:ncRNA export from nucleus; F:RNA binding; F:mRNA binding; F:structural constituent of ribosome; F:rRNA binding; F:heterocycl…
g912.t1	KAJ3569526.1hypothetical protein NP233_g4990	3	0	85.82	14	P:GO:0006378; P:GO:0010468; P:GO:0031440; P:GO:0072423; F:GO:0003729; F:GO:0046982; F:GO:1901363; C:GO:0005634; C:GO:0005654; C:GO:0005737; C:GO:0005739; C:GO:0005829; C:GO:0005847	P:obsolete mRNA polyadenylation; P:regulation of gene expression; P:regulation of mRNA 3'-end processing; P:response to DNA damage checkpoint signaling; F:mRNA binding; F:protein heterodimerization activity; F:heterocyclic compound binding; C:nucleus; C:nucleoplasm; C:cytoplasm; C:mitochondrion; C:cytosol; C:mRNA cleavage and polyadenylation specificity factor complex
g913.t1	KAF5363866.1hypothetical protein D9756_001085	3	0	78.68	2	F:GO:0016787	F:hydrolase activity	EC:3	Hydrolases
g914.t1	KAF7776475.1hypothetical protein Agabi119p4_4868	3	8.7e-156	76.24	3	F:GO:0003676; F:GO:0003723; C:GO:1990904	F:nucleic acid binding; F:RNA binding; C:ribonucleoprotein complex
g915.t1	KAF5363861.1hypothetical protein D9756_001082	3	3.92e-135	92.48	10	P:GO:0006541; P:GO:0006805; P:GO:0008615; P:GO:0042823; F:GO:0004359; C:GO:0005829; C:GO:1903600	P:glutamine metabolic process; P:xenobiotic metabolic process; P:pyridoxine biosynthetic process; P:pyridoxal phosphate biosynthetic process; F:glutaminase activity; C:cytosol; C:glutaminase complex	EC:3.5.1.2	glutaminase
g916.t1	AFV15786.1laccase	3	0	85.93	1	F:GO:0046872	F:metal ion binding
g917.t1	KAF5363862.1hypothetical protein D9756_001081	3	0	89.17	4	P:GO:0006508; F:GO:0004185	P:proteolysis; F:serine-type carboxypeptidase activity	EC:3.4.16	Acting on peptide bonds (peptidases)
g918.t1	KAF5363413.1hypothetical protein D9756_001079	3	0	73.53	13	P:GO:0000122; P:GO:0010629; P:GO:0045815; P:GO:0045944; P:GO:1905268; P:GO:2000219; P:GO:2001251; F:GO:0003682; F:GO:0016887; F:GO:0042393; C:GO:0005634; C:GO:0005829; C:GO:0042406	P:negative regulation of transcription by RNA polymerase II; P:negative regulation of gene expression; P:transcription initiation-coupled chromatin remodeling; P:positive regulation of transcription by RNA polymerase II; P:negative regulation of chromatin organization; P:positive regulation of invasive growth in response to glucose limitation; P:negative regulation of chromosome organization; F:c…	EC:3.6.1.15	nucleoside-triphosphate phosphatase
g919.t1	KAF8159249.1hypothetical protein B0H34DRAFT_796530	3	5.82e-08	68.35
g920.t1	AFV15785.1laccase	3	0	92.2	2	F:GO:0016491; F:GO:0046872	F:oxidoreductase activity; F:metal ion binding	EC:1	Oxidoreductases
g921.t1	KAF5362106.1hypothetical protein D9756_002109	3	2.02e-127	60.49	1	F:GO:0003676	F:nucleic acid binding
g922.t1	KAF5362189.1hypothetical protein D9756_002110	3	2.26e-84	81.64	1	F:GO:0016787	F:hydrolase activity	EC:3	Hydrolases
g923.t1	KAF5362191.1hypothetical protein D9756_002111	3	2.92e-242	93.21
g924.t1	KAF5352734.1hypothetical protein D9756_005911	3	1.84e-176	51.63	13	P:GO:0002791; P:GO:0006893; P:GO:0007264; P:GO:0017157; P:GO:0030010; P:GO:0043547; P:GO:0050708; F:GO:0005096; F:GO:0019905; F:GO:0031267; C:GO:0005829; C:GO:0005886; C:GO:0032991	P:regulation of peptide secretion; P:Golgi to plasma membrane transport; P:small GTPase-mediated signal transduction; P:regulation of exocytosis; P:establishment of cell polarity; P:positive regulation of GTPase activity; P:regulation of protein secretion; F:GTPase activator activity; F:syntaxin binding; F:small GTPase binding; C:cytosol; C:plasma membrane; C:protein-containing complex
g925.t1	KAF5352735.1hypothetical protein D9756_005910	3	1.27e-289	61.28
g926.t1	KAJ3556908.1hypothetical protein NP233_g11870	3	6.15e-109	90.3	8	F:GO:0004497; F:GO:0005506; F:GO:0016705; F:GO:0020037	F:monooxygenase activity; F:iron ion binding; F:oxidoreductase activity, acting on paired donors, with incorporation or reduction of molecular oxygen; F:heme binding	EC:1.14	Acting on paired donors, with incorporation or reduction of molecular oxygen. The oxygen incorporated need not be derived from O2
g927.t1	KAF5362512.1hypothetical protein D9756_002498	3	0	94.39	20	P:GO:0000920; P:GO:0006886; P:GO:0006887; P:GO:0006893; P:GO:0015833; P:GO:0035544; P:GO:0051601; P:GO:0090522; F:GO:0000149; F:GO:0042803; C:GO:0000145; C:GO:0005628; C:GO:0005934; C:GO:0005935; C:GO:0032153; C:GO:0043332; C:GO:0090726; C:GO:0097575; C:GO:1902716	P:septum digestion after cytokinesis; P:intracellular protein transport; P:exocytosis; P:Golgi to plasma membrane transport; P:peptide transport; P:negative regulation of SNARE complex assembly; P:exocyst localization; P:vesicle tethering involved in exocytosis; F:SNARE binding; F:protein homodimerization activity; C:exocyst; C:prospore membrane; C:cellular bud tip; C:cellular bud neck; C:cell di…
g928.t1	KAG6866541.1hypothetical protein C0991_002026	3	1.22e-112	93.14	11	P:GO:0009435; F:GO:0003952; F:GO:0004359; F:GO:0005524; C:GO:0005634; C:GO:0005737	P:NAD biosynthetic process; F:NAD+ synthase (glutamine-hydrolyzing) activity; F:glutaminase activity; F:ATP binding; C:nucleus; C:cytoplasm	EC:3.5.1.2; EC:6.3.5.1	glutaminase; NAD(+) synthase (glutamine-hydrolyzing)
g929.t1	KAJ3572358.1hypothetical protein NP233_g3138	3	0	92.41	12	P:GO:0006633; P:GO:2001295; F:GO:0003989; F:GO:0004075; F:GO:0005524; F:GO:0046872	P:fatty acid biosynthetic process; P:malonyl-CoA biosynthetic process; F:acetyl-CoA carboxylase activity; F:biotin carboxylase activity; F:ATP binding; F:metal ion binding	EC:6.4.1.2; EC:6.3.4.14	acetyl-CoA carboxylase; biotin carboxylase
g930.t1	KAF5362515.1hypothetical protein D9756_002496	3	6.99E-314	65.16	20	P:GO:0000183; P:GO:0007165; P:GO:0010971; P:GO:0030010; P:GO:0030437; P:GO:0032515; P:GO:0032880; P:GO:0044703; P:GO:0045892; P:GO:0051276; P:GO:0071277; P:GO:0071852; F:GO:0004864; C:GO:0000935; C:GO:0005622; C:GO:0005634; C:GO:0005934; C:GO:0005935; C:GO:0005938; C:GO:0099568	P:rDNA heterochromatin formation; P:signal transduction; P:positive regulation of G2/M transition of mitotic cell cycle; P:establishment of cell polarity; P:ascospore formation; P:negative regulation of phosphoprotein phosphatase activity; P:regulation of protein localization; P:multi-organism reproductive process; P:negative regulation of DNA-templated transcription; P:chromosome organization; P…
g931.t1	KAF5362575.1hypothetical protein D9756_002493	3	4.68e-143	80.22	1	F:GO:0016491	F:oxidoreductase activity	EC:1	Oxidoreductases
g932.t1	KAJ3576108.1hypothetical protein NP233_g672	3	0	75.26	4	P:GO:0015074; F:GO:0003676; F:GO:0003723; C:GO:0005634	P:DNA integration; F:nucleic acid binding; F:RNA binding; C:nucleus
g933.t1	KAF5357985.1hypothetical protein D9756_001476	3	0	85.45	17	P:GO:0006508; P:GO:0010951; P:GO:0016540; P:GO:0031139; P:GO:0031324; P:GO:0048522; P:GO:0071432; P:GO:2000243; F:GO:0004252; F:GO:0004867; F:GO:0005515; C:GO:0000139; C:GO:0000324; C:GO:0009986; C:GO:0016020; C:GO:0032588	P:proteolysis; P:negative regulation of endopeptidase activity; P:protein autoprocessing; P:positive regulation of conjugation with cellular fusion; P:negative regulation of cellular metabolic process; P:positive regulation of cellular process; P:peptide mating pheromone maturation involved in positive regulation of conjugation with cellular fusion; P:positive regulation of reproductive process; …	EC:3.4.21	Acting on peptide bonds (peptidases)
g934.t1	KAJ3562397.1hypothetical protein NP233_g9599	3	0	84.76	32	P:GO:0000727; P:GO:0006267; P:GO:0006268; P:GO:0006271; P:GO:0030174; P:GO:0030466; P:GO:0031509; P:GO:0032508; P:GO:0033260; P:GO:0045892; P:GO:1902975; F:GO:0003677; F:GO:0003678; F:GO:0003682; F:GO:0003688; F:GO:0005524; F:GO:0016887; F:GO:0017116; C:GO:0000785; C:GO:0005656; C:GO:0005737; C:GO:0031261; C:GO:0031298; C:GO:0042555; C:GO:0043596; C:GO:0071162; C:GO:0097373	P:double-strand break repair via break-induced replication; P:pre-replicative complex assembly involved in nuclear cell cycle DNA replication; P:DNA unwinding involved in DNA replication; P:DNA strand elongation involved in DNA replication; P:regulation of DNA-templated DNA replication initiation; P:silent mating-type cassette heterochromatin formation; P:subtelomeric heterochromatin formation; P…	EC:3.6.1.15	nucleoside-triphosphate phosphatase
g935.t1	KAF5357987.1hypothetical protein D9756_001474	3	8.74e-244	62.49	2	F:GO:0016740	F:transferase activity	EC:2	Transferases
g936.t1	KXN86924.1Increased rDNA silencing protein 4	3	5.16e-44	67.12
g937.t1	KAF5357992.1hypothetical protein D9756_001471	3	0	72.2	14	P:GO:0000422; P:GO:0032258; P:GO:0034497; P:GO:0034727; P:GO:0051260; P:GO:0061709; C:GO:0000329; C:GO:0000407; C:GO:0005737; C:GO:0005739; C:GO:0005776; C:GO:0016020; C:GO:0030659; C:GO:0043231	P:autophagy of mitochondrion; P:cytoplasm to vacuole targeting by the Cvt pathway; P:protein localization to phagophore assembly site; P:piecemeal microautophagy of the nucleus; P:protein homooligomerization; P:reticulophagy; C:fungal-type vacuole membrane; C:phagophore assembly site; C:cytoplasm; C:mitochondrion; C:autophagosome; C:membrane; C:cytoplasmic vesicle membrane; C:intracellular membra…
g938.t1	KAJ3559992.1hypothetical protein NP233_g11119	3	0	94.17	8	P:GO:0008652; P:GO:0009098; F:GO:0003852; F:GO:0046872	P:amino acid biosynthetic process; P:L-leucine biosynthetic process; F:2-isopropylmalate synthase activity; F:metal ion binding	EC:2.3.3.13	2-isopropylmalate synthase
g939.t1	KAF5358421.1hypothetical protein D9756_001469	3	0	87.68	14	P:GO:0002181; P:GO:0006424; P:GO:0019752; F:GO:0003729; F:GO:0004818; F:GO:0005524; C:GO:0005737; C:GO:0005739; C:GO:0010494; C:GO:0017102; C:GO:1990904	P:cytoplasmic translation; P:glutamyl-tRNA aminoacylation; P:carboxylic acid metabolic process; F:mRNA binding; F:glutamate-tRNA ligase activity; F:ATP binding; C:cytoplasm; C:mitochondrion; C:cytoplasmic stress granule; C:methionyl glutamyl tRNA synthetase complex; C:ribonucleoprotein complex	EC:6.1.1.17	glutamate--tRNA ligase
g940.t1	KAF5348516.1hypothetical protein D9756_009561	3	0	82.65	2	P:GO:0008152; F:GO:0016740	P:metabolic process; F:transferase activity	EC:2	Transferases
g941.t1	KAF5348517.1hypothetical protein D9756_009562	3	1.02e-246	59.8	6	P:GO:0006351; P:GO:0006355; P:GO:0006357; F:GO:0000981; F:GO:0003677; F:GO:0008270	P:DNA-templated transcription; P:regulation of DNA-templated transcription; P:regulation of transcription by RNA polymerase II; F:DNA-binding transcription factor activity, RNA polymerase II-specific; F:DNA binding; F:zinc ion binding
g942.t1	KAF5355753.1hypothetical protein D9756_003964	3	0	80.63	27	P:GO:0000019; P:GO:0000712; P:GO:0006265; P:GO:0006271; P:GO:0007076; P:GO:0010556; P:GO:0031055; P:GO:0044774; P:GO:0051306; P:GO:0051307; P:GO:0061982; P:GO:0097046; F:GO:0003677; F:GO:0003918; F:GO:0005524; F:GO:0016887; F:GO:0046872; C:GO:0000791; C:GO:0000795; C:GO:0005739; C:GO:0034506; C:GO:0097047	P:regulation of mitotic recombination; P:resolution of meiotic recombination intermediates; P:DNA topological change; P:DNA strand elongation involved in DNA replication; P:mitotic chromosome condensation; P:regulation of macromolecule biosynthetic process; P:chromatin remodeling at centromere; P:mitotic DNA integrity checkpoint signaling; P:mitotic sister chromatid separation; P:meiotic chromoso…	EC:5.6.2.2; EC:3.6.1.15	DNA topoisomerase (ATP-hydrolyzing); nucleoside-triphosphate phosphatase
g943.t1	KXN89811.1hypothetical protein AN958_04815	3	0	79.1	4	F:GO:0005524; F:GO:0016887	F:ATP binding; F:ATP hydrolysis activity	EC:3.6.1.15	nucleoside-triphosphate phosphatase
g944.t1	KAJ3556513.1hypothetical protein NP233_g11960	3	9.91e-119	87.43
g945.t1	KXN89815.1Chorismate synthase	3	6.35e-271	95.71	11	P:GO:0008652; P:GO:0009073; P:GO:0009423; F:GO:0004107; F:GO:0010181; F:GO:0042602; C:GO:0005829	P:amino acid biosynthetic process; P:aromatic amino acid family biosynthetic process; P:chorismate biosynthetic process; F:chorismate synthase activity; F:FMN binding; F:riboflavin reductase (NADPH) activity; C:cytosol	EC:4.2.3.5; EC:1.5.1.30	chorismate synthase; flavin reductase (NADPH)
g946.t1	KAF5347006.1hypothetical protein D9756_011009	3	1.6e-37	56.56	1	F:GO:0003824	F:catalytic activity
g947.t1	KAF5363393.1hypothetical protein D9756_000248	3	0	87.26	8	P:GO:0006508; F:GO:0004252; F:GO:0046872; C:GO:0005615	P:proteolysis; F:serine-type endopeptidase activity; F:metal ion binding; C:extracellular space	EC:3.4.21	Acting on peptide bonds (peptidases)
g948.t1	KAF5363386.1hypothetical protein D9756_000247	3	0	70.11	2	P:GO:0016070; C:GO:0005622	P:RNA metabolic process; C:intracellular anatomical structure
g949.t1	KAF5363385.1hypothetical protein D9756_000246	3	2.16e-169	76.43	1	F:GO:0003824	F:catalytic activity	EC:3.3.2.10; EC:3.1.3.76	soluble epoxide hydrolase; lipid-phosphate phosphatase
g950.t1	KAJ3572273.1hypothetical protein NP233_g3198	3	3.28e-219	91.26	7	P:GO:0006406; P:GO:0006611; P:GO:0015833; P:GO:0031503; P:GO:0071166; C:GO:0000445	P:mRNA export from nucleus; P:protein export from nucleus; P:peptide transport; P:protein-containing complex localization; P:ribonucleoprotein complex localization; C:THO complex part of transcription export complex
g951.t1	KAF5363387.1hypothetical protein D9756_000244	3	2.63e-141	48.71	1	C:GO:0016020	C:membrane
g952.t1	KAF5363390.1hypothetical protein D9756_000243	3	0	89.35	14	P:GO:0006508; P:GO:0007018; F:GO:0005524; F:GO:0070008; C:GO:0005737; C:GO:0005868; C:GO:0005874	P:proteolysis; P:microtubule-based movement; F:ATP binding; F:serine-type exopeptidase activity; C:cytoplasm; C:cytoplasmic dynein complex; C:microtubule	EC:3.4	Acting on peptide bonds (peptidases)
g953.t1	KAJ3572272.1hypothetical protein NP233_g3192	3	2.67e-142	87.24	1	C:GO:0005634	C:nucleus
g954.t1	KAJ3565774.1hypothetical protein NP233_g7426	3	1.7e-18	46.16
g955.t1	KAF8628807.1hypothetical protein AX17_005914	2	2.3e-07	71.28
g956.t1	KAJ3560359.1hypothetical protein NP233_g10892	3	1.93e-170	85.78	1	F:GO:0097159	F:organic cyclic compound binding
g957.t1	KAF7770962.1hypothetical protein Agabi119p4_6936	3	1.34e-150	86.54	3	P:GO:0015074; F:GO:0003723; C:GO:0005634	P:DNA integration; F:RNA binding; C:nucleus
g959.t1	KAJ3556824.1hypothetical protein NP233_g11893	3	3.17e-167	85.53
g960.t1	KAF5355102.1hypothetical protein D9756_005770	3	3.03e-82	75.12
g961.t1	KAF5358046.1hypothetical protein D9756_001729	3	0	88.34	22	P:GO:0000909; P:GO:0007088; P:GO:0007096; P:GO:0030154; P:GO:0031030; P:GO:0031991; P:GO:0044703; P:GO:0045930; P:GO:0046580; P:GO:0061509; P:GO:0110020; P:GO:1903437; F:GO:0005516; F:GO:0044877; C:GO:0005635; C:GO:0016020; C:GO:0032991; C:GO:0071957; C:GO:0090443	P:sporocarp development involved in sexual reproduction; P:regulation of mitotic nuclear division; P:regulation of exit from mitosis; P:cell differentiation; P:negative regulation of septation initiation signaling; P:regulation of actomyosin contractile ring contraction; P:multi-organism reproductive process; P:negative regulation of mitotic cell cycle; P:negative regulation of Ras protein signal…
g962.t1	KAJ3574560.1hypothetical protein NP233_g1693	3	0	93.13	32	P:GO:0000289; P:GO:0000749; P:GO:0007124; P:GO:0010607; P:GO:0010628; P:GO:0017148; P:GO:0031139; P:GO:0031333; P:GO:0032781; P:GO:0032968; P:GO:0051345; P:GO:0051726; P:GO:0055085; P:GO:2000243; F:GO:0001671; F:GO:0005198; F:GO:0005515; F:GO:0008047; F:GO:0022857; F:GO:0060090; F:GO:0060589; C:GO:0000932; C:GO:0005634; C:GO:0016020; C:GO:0030015; C:GO:1990904	P:nuclear-transcribed mRNA poly(A) tail shortening; P:response to pheromone triggering conjugation with cellular fusion; P:pseudohyphal growth; P:negative regulation of cytoplasmic mRNA processing body assembly; P:positive regulation of gene expression; P:negative regulation of translation; P:positive regulation of conjugation with cellular fusion; P:negative regulation of protein-containing comp…
g963.t1	KXN90497.1Alpha-amylase 1	3	4.09e-192	85.83	8	P:GO:0016052; F:GO:0004556; F:GO:0005509; C:GO:0110165	P:carbohydrate catabolic process; F:alpha-amylase activity; F:calcium ion binding; C:cellular anatomical entity	EC:3.2.1.1	alpha-amylase
g964.t1	KAF9452857.1MBF1-domain-containing protein	3	7.75e-66	94.1	7	P:GO:0010628; P:GO:0045944; F:GO:0003677; F:GO:0003713; C:GO:0005634; C:GO:0005739	P:positive regulation of gene expression; P:positive regulation of transcription by RNA polymerase II; F:DNA binding; F:transcription coactivator activity; C:nucleus; C:mitochondrion
g965.t1	KAF5360861.1hypothetical protein D9756_004730	3	3.44e-198	86.5	2	F:GO:0018580	F:nitronate monooxygenase activity	EC:1.13.12.16	nitronate monooxygenase
g966.t1	KAJ3564564.1hypothetical protein NP233_g8215	3	0	71.73	20	P:GO:0006996; P:GO:0007127; P:GO:0016310; P:GO:0030474; P:GO:0031134; P:GO:0045931; P:GO:0046777; P:GO:0051225; P:GO:0051988; P:GO:0090267; P:GO:1990299; F:GO:0004674; F:GO:0004712; F:GO:0005524; C:GO:0000776; C:GO:0000794; C:GO:0032991; C:GO:0044732	P:organelle organization; P:meiosis I; P:phosphorylation; P:spindle pole body duplication; P:sister chromatid biorientation; P:positive regulation of mitotic cell cycle; P:protein autophosphorylation; P:spindle assembly; P:regulation of attachment of spindle microtubules to kinetochore; P:positive regulation of mitotic cell cycle spindle assembly checkpoint; P:Bub1-Bub3 complex localization to ki…	EC:2.7.12.1; EC:2.7.11.1	dual-specificity kinase; non-specific serine/threonine protein kinase
g968.t1	KAF5352407.1hypothetical protein D9756_005826	3	4.67e-200	77.72	1	F:GO:0008757	F:S-adenosylmethionine-dependent methyltransferase activity
g969.t1	KAF5352406.1hypothetical protein D9756_005827	3	0	73.77	6	P:GO:0065008; P:GO:1990854; F:GO:0008289; C:GO:0005783; C:GO:0071561; C:GO:0071944	P:regulation of biological quality; P:vacuole-ER tethering; F:lipid binding; C:endoplasmic reticulum; C:nucleus-vacuole junction; C:cell periphery
g970.t1	KAJ3571570.1hypothetical protein NP233_g3683	3	3.33e-162	70.95
g971.t1	KAG5635656.1hypothetical protein H0H81_010511	3	6.03e-204	63.62	22	P:GO:0000433; P:GO:0000750; P:GO:0001403; P:GO:0007165; P:GO:0007187; P:GO:0008277; P:GO:0010515; P:GO:0010619; P:GO:0010629; P:GO:0019933; P:GO:0032092; P:GO:0043577; P:GO:0048522; P:GO:0065008; P:GO:2000242; P:GO:2000243; F:GO:0005198; F:GO:0005515; F:GO:0030159; C:GO:0005622; C:GO:0005834; C:GO:0005937	P:carbon catabolite repression of transcription from RNA polymerase II promoter by glucose; P:pheromone-dependent signal transduction involved in conjugation with cellular fusion; P:invasive growth in response to glucose limitation; P:signal transduction; P:G protein-coupled receptor signaling pathway, coupled to cyclic nucleotide second messenger; P:regulation of G protein-coupled receptor signa…
g972.t1	KAF5352673.1hypothetical protein D9756_005835	3	2.89e-161	91.45	8	P:GO:0006412; P:GO:0032543; F:GO:0003723; F:GO:0003735; C:GO:0005762; C:GO:0015934	P:translation; P:mitochondrial translation; F:RNA binding; F:structural constituent of ribosome; C:mitochondrial large ribosomal subunit; C:large ribosomal subunit
g973.t1	KAJ3576108.1hypothetical protein NP233_g672	3	1.04e-132	60.59	3	F:GO:0003676; F:GO:0008270; C:GO:0005634	F:nucleic acid binding; F:zinc ion binding; C:nucleus
g974.t1	KAF7776539.1hypothetical protein Agabi119p4_4932	3	1.26e-130	78.92	4	P:GO:0015074; F:GO:0003676; F:GO:0003723; C:GO:0005634	P:DNA integration; F:nucleic acid binding; F:RNA binding; C:nucleus
g976.t1	KAF5350523.1hypothetical protein D9756_008706	3	0	65.19	16	P:GO:0000436; P:GO:0000724; P:GO:0005987; P:GO:0006337; P:GO:0010628; P:GO:0034756; P:GO:0044248; P:GO:0051276; P:GO:2000219; F:GO:0061629; F:GO:0140110; C:GO:0000228; C:GO:0005634; C:GO:0005829; C:GO:0016514; C:GO:0016586	P:carbon catabolite activation of transcription from RNA polymerase II promoter; P:double-strand break repair via homologous recombination; P:sucrose catabolic process; P:nucleosome disassembly; P:positive regulation of gene expression; P:regulation of iron ion transport; P:cellular catabolic process; P:chromosome organization; P:positive regulation of invasive growth in response to glucose limit…
g977.t1	KAF5360975.1hypothetical protein D9756_004486	1	5.31e-15	65.66	3	F:GO:0003676; F:GO:0008270; C:GO:0005634	F:nucleic acid binding; F:zinc ion binding; C:nucleus
g978.t1	KAF5351907.1hypothetical protein D9756_007472	3	1.35e-81	86.27	4	P:GO:0006357; F:GO:0000981; F:GO:0003677; F:GO:0008270	P:regulation of transcription by RNA polymerase II; F:DNA-binding transcription factor activity, RNA polymerase II-specific; F:DNA binding; F:zinc ion binding
g979.t1	KAF5351719.1hypothetical protein D9756_007469	3	3.93e-202	93.27	8	P:GO:0000338; P:GO:0006511; P:GO:0044248; P:GO:0071629; F:GO:0004843; F:GO:0019784; C:GO:0005737	P:protein deneddylation; P:ubiquitin-dependent protein catabolic process; P:cellular catabolic process; P:cytoplasm protein quality control by the ubiquitin-proteasome system; F:cysteine-type deubiquitinase activity; F:deNEDDylase activity; C:cytoplasm	EC:3.4.19.12	ubiquitinyl hydrolase 1
g980.t1	KAF9453926.1hypothetical protein P691DRAFT_755001	3	0	70.73	3	P:GO:0007165; F:GO:0005096; C:GO:0005856	P:signal transduction; F:GTPase activator activity; C:cytoskeleton
g981.t1	KAF5351722.1hypothetical protein D9756_007466	3	3.35e-127	71.7	5	P:GO:0000376; P:GO:0070131; F:GO:0008494; F:GO:1901363; C:GO:0005739	P:RNA splicing, via transesterification reactions with guanosine as nucleophile; P:positive regulation of mitochondrial translation; F:translation activator activity; F:heterocyclic compound binding; C:mitochondrion
g982.t1	KAF5351723.1hypothetical protein D9756_007465	3	8.22e-218	91.96	10	F:GO:0004497; F:GO:0005506; F:GO:0016705; F:GO:0020037; C:GO:0016020	F:monooxygenase activity; F:iron ion binding; F:oxidoreductase activity, acting on paired donors, with incorporation or reduction of molecular oxygen; F:heme binding; C:membrane	EC:1.14	Acting on paired donors, with incorporation or reduction of molecular oxygen. The oxygen incorporated need not be derived from O2
g983.t1	KAF5359691.1hypothetical protein D9756_003084	3	5.06e-147	54.18
g984.t1	KAF5359690.1hypothetical protein D9756_003085	3	0	91.18	30	P:GO:0006633; P:GO:0006635; F:GO:0000287; F:GO:0004312; F:GO:0004313; F:GO:0004314; F:GO:0004315; F:GO:0004316; F:GO:0004317; F:GO:0004318; F:GO:0004321; F:GO:0008659; F:GO:0008897; F:GO:0016297; C:GO:0005835	P:fatty acid biosynthetic process; P:fatty acid beta-oxidation; F:magnesium ion binding; F:fatty acid synthase activity; F:[acyl-carrier-protein] S-acetyltransferase activity; F:[acyl-carrier-protein] S-malonyltransferase activity; F:3-oxoacyl-[acyl-carrier-protein] synthase activity; F:3-oxoacyl-[acyl-carrier-protein] reductase (NADPH) activity; F:(3R)-3-hydroxypalmitoyl-[acyl-carrier-protein] d…	EC:2.3.1.85; EC:2.3.1.41; EC:2.3.1.86; EC:1.3.1.9; EC:2.3.1.38; EC:4.2.1.59; EC:1.1.1.100; EC:3.1.2.21; EC:2.3.1.39; EC:2.7.8.7	fatty-acid synthase system; beta-ketoacyl-[acyl-carrier-protein] synthase I; fatty-acyl-CoA synthase system; enoyl-[acyl-carrier-protein] reductase (NADH); [acyl-carrier-protein] S-acetyltransferase; 3-hydroxyacyl-[acyl-carrier-protein] dehydratase; 3-oxoacyl-[acyl-carrier-protein] reductase; dodecanoyl-[acyl-carrier-protein] hydrolase; [acyl-carrier-protein] S-malonyltransferase; holo-[acyl-carr…
g985.t1	KAJ3565174.1hypothetical protein NP233_g7805	3	0	83.07	15	P:GO:0006799; P:GO:0007034; P:GO:0016237; P:GO:0016310; P:GO:0035556; P:GO:0042144; P:GO:0061025; F:GO:0000822; F:GO:0008976; C:GO:0000329; C:GO:0005774; C:GO:0005783; C:GO:0033254; C:GO:0071944; C:GO:0101031	P:polyphosphate biosynthetic process; P:vacuolar transport; P:microautophagy; P:phosphorylation; P:intracellular signal transduction; P:vacuole fusion, non-autophagic; P:membrane fusion; F:inositol hexakisphosphate binding; F:polyphosphate kinase activity; C:fungal-type vacuole membrane; C:vacuolar membrane; C:endoplasmic reticulum; C:vacuolar transporter chaperone complex; C:cell periphery; C:pr…	EC:2.7.4.1	ATP-polyphosphate phosphotransferase
g987.t1	XP_006455530.1hypothetical protein AGABI2DRAFT_59057, partial	3	9.21e-38	70.3
g988.t1	KAJ3561033.1hypothetical protein NP233_g10445	3	1.83e-41	65.25	1	F:GO:0003824	F:catalytic activity
g989.t1	KAF5354848.1hypothetical protein D9756_005589	3	1.72e-164	72.62
g990.t1	KAF5354847.1hypothetical protein D9756_005588	3	6.26e-154	77.04
g991.t1	KAF5354847.1hypothetical protein D9756_005588	3	3.8e-124	68.45
g992.t1	KAF5354844.1hypothetical protein D9756_005587	3	6.83e-233	83.63
g993.t1	KAF9444528.1mitochondrial carrier	3	4.01e-101	62.49	3	P:GO:0055085; C:GO:0005739; C:GO:0016020	P:transmembrane transport; C:mitochondrion; C:membrane
g994.t1	KAF5354845.1hypothetical protein D9756_005584	3	0	85.09	20	P:GO:0006448; P:GO:0031571; P:GO:0032147; P:GO:0034198; P:GO:0060992; P:GO:0070301; P:GO:0071236; P:GO:0071264; P:GO:0071407; P:GO:0071417; P:GO:0071466; P:GO:0097237; P:GO:1990451; P:GO:1990625; P:GO:2000766; F:GO:0030295; F:GO:0043022; C:GO:0005739; C:GO:0022626; C:GO:1990904	P:regulation of translational elongation; P:mitotic G1 DNA damage checkpoint signaling; P:activation of protein kinase activity; P:cellular response to amino acid starvation; P:response to fungicide; P:cellular response to hydrogen peroxide; P:cellular response to antibiotic; P:positive regulation of translational initiation in response to starvation; P:cellular response to organic cyclic compoun…
g995.t1	KAJ3576765.1hypothetical protein NP233_g203	3	0	82.51	11	P:GO:0000461; P:GO:0043628; F:GO:0003924; F:GO:0005525; F:GO:0032550; F:GO:0034511; F:GO:0043021; C:GO:0005730; C:GO:0005737; C:GO:0030686; C:GO:0030688	P:endonucleolytic cleavage to generate mature 3'-end of SSU-rRNA from (SSU-rRNA, 5.8S rRNA, LSU-rRNA); P:regulatory ncRNA 3'-end processing; F:GTPase activity; F:GTP binding; F:purine ribonucleoside binding; F:U3 snoRNA binding; F:ribonucleoprotein complex binding; C:nucleolus; C:cytoplasm; C:90S preribosome; C:preribosome, small subunit precursor	EC:3.6.1.15	nucleoside-triphosphate phosphatase
g996.t1	KAF5351936.1hypothetical protein D9756_007663	3	4.73e-196	86.17	3	F:GO:0005525; C:GO:0005938; C:GO:0032156	F:GTP binding; C:cell cortex; C:septin cytoskeleton
g997.t1	KAF5351934.1hypothetical protein D9756_007661	3	0	89.55	9	P:GO:0000001; P:GO:0006873; P:GO:0051641; P:GO:0065008; P:GO:1900208; C:GO:0005634; C:GO:0005743	P:mitochondrion inheritance; P:intracellular monoatomic ion homeostasis; P:cellular localization; P:regulation of biological quality; P:regulation of cardiolipin metabolic process; C:nucleus; C:mitochondrial inner membrane
g998.t1	KAJ3576755.1hypothetical protein NP233_g198	3	1.35e-170	91.92	7	P:GO:0006915; P:GO:0019722; P:GO:0030968; C:GO:0000324; C:GO:0005739; C:GO:0005789; C:GO:0016020	P:apoptotic process; P:calcium-mediated signaling; P:endoplasmic reticulum unfolded protein response; C:fungal-type vacuole; C:mitochondrion; C:endoplasmic reticulum membrane; C:membrane
g999.t1	KAF5351705.1hypothetical protein D9756_007656	3	3.98e-70	84.26	1	F:GO:0016491	F:oxidoreductase activity
g1000.t1	CDJ79825.1acetyl xylan esterase precursor	3	2.67e-238	92.98	8	P:GO:0045493; F:GO:0030248; F:GO:0052689; C:GO:0005576	P:xylan catabolic process; F:cellulose binding; F:carboxylic ester hydrolase activity; C:extracellular region	EC:3.1.1	Acting on ester bonds
g1001.t1	KAJ3568885.1hypothetical protein NP233_g5420	3	0	93.95	24	P:GO:0000055; P:GO:0000056; P:GO:0006406; P:GO:0006611; P:GO:0034501; P:GO:0034599; P:GO:0046825; P:GO:0071166; P:GO:0090087; F:GO:0005049; F:GO:0005215; F:GO:0005525; F:GO:0031267; F:GO:0032550; C:GO:0000776; C:GO:0005634; C:GO:0005643; C:GO:0005737; C:GO:0005816; C:GO:0016020; C:GO:0030687; C:GO:0034399	P:ribosomal large subunit export from nucleus; P:ribosomal small subunit export from nucleus; P:mRNA export from nucleus; P:protein export from nucleus; P:protein localization to kinetochore; P:cellular response to oxidative stress; P:regulation of protein export from nucleus; P:ribonucleoprotein complex localization; P:regulation of peptide transport; F:nuclear export signal receptor activity; F…
g1002.t1	KAF5358035.1hypothetical protein D9756_001935	3	1.48e-119	78.22
g1003.t1	KAG6919963.1hypothetical protein DXG01_013312	3	0	81.5	23	P:GO:0006457; P:GO:0016567; P:GO:0031145; P:GO:0031331; P:GO:0032436; P:GO:0045842; P:GO:0045930; P:GO:0051781; P:GO:0062033; F:GO:0003677; F:GO:0005524; F:GO:0016887; F:GO:0051082; F:GO:0140662; C:GO:0005680; C:GO:0005832; C:GO:0034399	P:protein folding; P:protein ubiquitination; P:anaphase-promoting complex-dependent catabolic process; P:positive regulation of cellular catabolic process; P:positive regulation of proteasomal ubiquitin-dependent protein catabolic process; P:positive regulation of mitotic metaphase/anaphase transition; P:negative regulation of mitotic cell cycle; P:positive regulation of cell division; P:positive…	EC:3.6.1.15	nucleoside-triphosphate phosphatase
g1004.t1	KAJ3568881.1hypothetical protein NP233_g5424	3	8.17e-247	77.03	19	P:GO:0000079; P:GO:0007095; P:GO:0008361; P:GO:0009987; P:GO:0010558; P:GO:0010971; P:GO:0031573; P:GO:0033314; P:GO:0035335; P:GO:0045840; P:GO:0051220; P:GO:0051781; P:GO:0072435; P:GO:0110032; P:GO:1903464; F:GO:0004721; F:GO:0004725; C:GO:0005634; C:GO:0005737	P:regulation of cyclin-dependent protein serine/threonine kinase activity; P:mitotic G2 DNA damage checkpoint signaling; P:regulation of cell size; P:cellular process; P:negative regulation of macromolecule biosynthetic process; P:positive regulation of G2/M transition of mitotic cell cycle; P:mitotic intra-S DNA damage checkpoint signaling; P:mitotic DNA replication checkpoint signaling; P:pepti…	EC:3.1.3.48	protein-tyrosine-phosphatase
g1005.t1	KAJ3568879.1hypothetical protein NP233_g5426	3	6.16e-75	78.98	7	P:GO:0000379; P:GO:0006388; F:GO:0000213; F:GO:0003824; C:GO:0000214; C:GO:0005634; C:GO:0005741	P:tRNA-type intron splice site recognition and cleavage; P:tRNA splicing, via endonucleolytic cleavage and ligation; F:tRNA-intron endonuclease activity; F:catalytic activity; C:tRNA-intron endonuclease complex; C:nucleus; C:mitochondrial outer membrane	EC:3.1.31.1; EC:3.1.27; EC:4.6.1.16	micrococcal nuclease; Acting on ester bonds; tRNA-intron lyase
g1006.t1	KAJ3568673.1hypothetical protein NP233_g5555	3	1.45e-93	54.84	1	F:GO:0003824	F:catalytic activity
g1007.t1	KXN80771.1hypothetical protein AN958_07809	2	4.33e-15	55.44
g1008.t1	KJA12977.1hypothetical protein HYPSUDRAFT_1082410, partial	3	2.21e-27	52.47
g1009.t1	KAJ3560359.1hypothetical protein NP233_g10892	3	3.18e-58	80.26
g1010.t1	KAF8629453.1hypothetical protein AX17_005656	1	5.3e-06	62.69
g1011.t1	KAG6913243.1hypothetical protein DXG01_008453	3	6.78e-27	64.83	3	F:GO:0003676; F:GO:0008270; C:GO:0005634	F:nucleic acid binding; F:zinc ion binding; C:nucleus
g1012.t1	KAF5360975.1hypothetical protein D9756_004486	3	5.25e-27	56.65	3	F:GO:0003676; F:GO:0008270; C:GO:0005634	F:nucleic acid binding; F:zinc ion binding; C:nucleus
g1013.t1	PPQ94342.1hypothetical protein CVT25_000408, partial	3	7.09e-20	67.73	1	C:GO:0016020	C:membrane
g1014.t1	PPQ94342.1hypothetical protein CVT25_000408, partial	3	7.09e-20	67.73	1	C:GO:0016020	C:membrane
g1016.t1	KAJ3560359.1hypothetical protein NP233_g10892	3	1.06e-74	84.99
g1017.t1	KIM65629.1hypothetical protein SCLCIDRAFT_22529	3	2.08e-07	63.2	1	F:GO:0005488	F:binding
g1018.t1	KAF5358061.1hypothetical protein D9756_001359	3	1.71e-136	65.98	1	C:GO:0033551	C:monopolin complex
g1019.t1	KAF5358518.1hypothetical protein D9756_001361	3	0	87.68	4	P:GO:0000162; F:GO:0004834	P:tryptophan biosynthetic process; F:tryptophan synthase activity	EC:4.2.1.20	tryptophan synthase
g1020.t1	KAJ3567952.1hypothetical protein NP233_g6027	3	1.01e-92	96.44	14	P:GO:0002183; P:GO:0006413; P:GO:0006446; P:GO:0050790; F:GO:0003723; F:GO:0003743; F:GO:0005085; F:GO:0051020; F:GO:1901363; C:GO:0005739; C:GO:0005829; C:GO:0005851; C:GO:0032045	P:cytoplasmic translational initiation; P:translational initiation; P:regulation of translational initiation; P:regulation of catalytic activity; F:RNA binding; F:translation initiation factor activity; F:guanyl-nucleotide exchange factor activity; F:GTPase binding; F:heterocyclic compound binding; C:mitochondrion; C:cytosol; C:eukaryotic translation initiation factor 2B complex; C:guanyl-nucleot…
g1021.t1	KAF5358516.1hypothetical protein D9756_001363	3	2.37e-208	96.88	14	P:GO:0045727; P:GO:0070131; F:GO:0003924; F:GO:0005525; F:GO:0032550; F:GO:0043022; C:GO:0005634; C:GO:0005743; C:GO:0005759	P:positive regulation of translation; P:positive regulation of mitochondrial translation; F:GTPase activity; F:GTP binding; F:purine ribonucleoside binding; F:ribosome binding; C:nucleus; C:mitochondrial inner membrane; C:mitochondrial matrix	EC:3.6.1.15	nucleoside-triphosphate phosphatase
g1022.t1	KAJ3559319.1hypothetical protein NP233_g11295	3	3.35e-80	92.21	3	P:GO:0045292; C:GO:0005684; C:GO:0071014	P:mRNA cis splicing, via spliceosome; C:U2-type spliceosomal complex; C:post-mRNA release spliceosomal complex
g1023.t1	KAF5358519.1hypothetical protein D9756_001366	3	0	79.72	6	P:GO:0043161; P:GO:0044248; P:GO:0045721; C:GO:0005634; C:GO:0005737; C:GO:0034657	P:proteasome-mediated ubiquitin-dependent protein catabolic process; P:cellular catabolic process; P:negative regulation of gluconeogenesis; C:nucleus; C:cytoplasm; C:GID complex
g1024.t1	KAF5359163.1hypothetical protein D9756_003174	3	2.56e-202	85.64	12	P:GO:0000272; P:GO:0006032; F:GO:0004568; F:GO:0008061; F:GO:0030246; C:GO:0005576	P:polysaccharide catabolic process; P:chitin catabolic process; F:chitinase activity; F:chitin binding; F:carbohydrate binding; C:extracellular region	EC:3.2.1.14	chitinase
g1025.t1	KAF5359165.1hypothetical protein D9756_003176	3	8.43e-204	88.68	4	F:GO:0016491; F:GO:0030151	F:oxidoreductase activity; F:molybdenum ion binding	EC:1	Oxidoreductases
g1026.t1	KAF5359161.1hypothetical protein D9756_003178	3	5.77e-187	89.37	10	P:GO:0000350; P:GO:0006397; P:GO:0008298; P:GO:0008380; P:GO:0045292; P:GO:0071030; C:GO:0005681; C:GO:0005682; C:GO:0046540; C:GO:0071021	P:generation of catalytic spliceosome for second transesterification step; P:mRNA processing; P:intracellular mRNA localization; P:RNA splicing; P:mRNA cis splicing, via spliceosome; P:nuclear mRNA surveillance of spliceosomal pre-mRNA splicing; C:spliceosomal complex; C:U5 snRNP; C:U4/U6 x U5 tri-snRNP complex; C:U2-type post-spliceosomal complex
g1027.t1	KAF5359160.1hypothetical protein D9756_003179	3	7.97e-257	81.91	23	P:GO:0000055; P:GO:0006364; P:GO:0006405; P:GO:0006611; P:GO:0006897; P:GO:0008361; P:GO:0015833; P:GO:0032781; P:GO:0042273; P:GO:0051345; P:GO:0071166; F:GO:0001671; F:GO:0003676; F:GO:0008047; F:GO:0008270; F:GO:0030544; F:GO:0060589; C:GO:0005730; C:GO:0005739; C:GO:0005829; C:GO:0030687	P:ribosomal large subunit export from nucleus; P:rRNA processing; P:RNA export from nucleus; P:protein export from nucleus; P:endocytosis; P:regulation of cell size; P:peptide transport; P:positive regulation of ATP-dependent activity; P:ribosomal large subunit biogenesis; P:positive regulation of hydrolase activity; P:ribonucleoprotein complex localization; F:ATPase activator activity; F:nucleic…
g1028.t1	KAF5359644.1hypothetical protein D9756_003182	3	1.95e-139	75.99	9	P:GO:0000395; F:GO:0003723; F:GO:0003729; F:GO:0030619; F:GO:1901363; C:GO:0000243; C:GO:0005685; C:GO:0071004; C:GO:0071011	P:mRNA 5'-splice site recognition; F:RNA binding; F:mRNA binding; F:U1 snRNA binding; F:heterocyclic compound binding; C:commitment complex; C:U1 snRNP; C:U2-type prespliceosome; C:precatalytic spliceosome
g1029.t1	KXN88858.1Alkaline ceramidase 3	3	1.32e-141	88.68	6	P:GO:0006672; F:GO:0016811; C:GO:0016020	P:ceramide metabolic process; F:hydrolase activity, acting on carbon-nitrogen (but not peptide) bonds, in linear amides; C:membrane	EC:3.5.1	Acting on carbon-nitrogen bonds, other than peptide bonds
g1030.t1	KAF5352762.1hypothetical protein D9756_005895	3	1.01e-251	92.06	12	P:GO:0006508; P:GO:0006627; P:GO:0006839; P:GO:0006886; P:GO:0007005; P:GO:0015833; F:GO:0004222; F:GO:0008270; F:GO:0046872; C:GO:0005743; C:GO:0017087	P:proteolysis; P:protein processing involved in protein targeting to mitochondrion; P:mitochondrial transport; P:intracellular protein transport; P:mitochondrion organization; P:peptide transport; F:metalloendopeptidase activity; F:zinc ion binding; F:metal ion binding; C:mitochondrial inner membrane; C:mitochondrial processing peptidase complex	EC:3.4.24	Acting on peptide bonds (peptidases)
g1031.t1	KAF5352763.1hypothetical protein D9756_005896	3	3.62e-234	62.15	1	P:GO:0006281	P:DNA repair
g1032.t1	KAF5352764.1hypothetical protein D9756_005897	3	6.74e-193	88.85	1	F:GO:0019905	F:syntaxin binding
g1033.t1	KAF5352769.1hypothetical protein D9756_005898	3	1.36e-294	87.22	5	P:GO:0006048; F:GO:0003977; F:GO:0070569; C:GO:0005634; C:GO:0005829	P:UDP-N-acetylglucosamine biosynthetic process; F:UDP-N-acetylglucosamine diphosphorylase activity; F:uridylyltransferase activity; C:nucleus; C:cytosol	EC:2.7.7.23	UDP-N-acetylglucosamine diphosphorylase
g1034.t1	KAF5353476.1hypothetical protein D9756_008105	3	3.68e-284	66.49	6	P:GO:0009987; P:GO:0051234; F:GO:0016787	P:cellular process; P:establishment of localization; F:hydrolase activity	EC:3	Hydrolases
g1035.t1	KAF5353438.1hypothetical protein D9756_008112	3	7.26e-208	83.65	13	P:GO:0006488; P:GO:0023052; P:GO:0036092; P:GO:0046856; F:GO:0043813; C:GO:0000329; C:GO:0016020; C:GO:0034399; C:GO:0070772	P:dolichol-linked oligosaccharide biosynthetic process; P:signaling; P:phosphatidylinositol-3-phosphate biosynthetic process; P:phosphatidylinositol dephosphorylation; F:phosphatidylinositol-3,5-bisphosphate 5-phosphatase activity; C:fungal-type vacuole membrane; C:membrane; C:nuclear periphery; C:PAS complex	EC:3.1.3	Acting on ester bonds
g1036.t1	KAF5362297.1hypothetical protein D9756_002040	3	4.73e-127	86.64	8	P:GO:0006352; P:GO:0006384; P:GO:0042797; C:GO:0000228; C:GO:0000785; C:GO:0005654; C:GO:0005666; C:GO:0055029	P:DNA-templated transcription initiation; P:transcription initiation at RNA polymerase III promoter; P:tRNA transcription by RNA polymerase III; C:nuclear chromosome; C:chromatin; C:nucleoplasm; C:RNA polymerase III complex; C:nuclear DNA-directed RNA polymerase complex
g1037.t1	KAF5354282.1hypothetical protein D9756_007151	3	5.67e-107	85.61	1	C:GO:0016020	C:membrane
g1038.t1	KAF5360793.1hypothetical protein D9756_004771	3	0	85.25	2	P:GO:0006511; F:GO:0031625	P:ubiquitin-dependent protein catabolic process; F:ubiquitin protein ligase binding
g1039.t1	KAJ3564989.1hypothetical protein NP233_g7928	3	1.74e-138	67.87	14	P:GO:0006357; P:GO:0010526; P:GO:0018393; P:GO:0031508; P:GO:0043007; P:GO:0044419; P:GO:0045892; P:GO:1900239; P:GO:1900429; P:GO:1990414; P:GO:2001032; F:GO:0016740; F:GO:0032931; C:GO:0005634	P:regulation of transcription by RNA polymerase II; P:retrotransposon silencing; P:internal peptidyl-lysine acetylation; P:pericentric heterochromatin formation; P:maintenance of rDNA; P:biological process involved in interspecies interaction between organisms; P:negative regulation of DNA-templated transcription; P:regulation of phenotypic switching; P:negative regulation of filamentous growth o…	EC:2.3.1.48	histone acetyltransferase
g1040.t1	KXN88198.1hypothetical protein AN958_07657	3	2.4e-82	63.12	13	P:GO:0006357; P:GO:0010526; P:GO:0018393; P:GO:0031508; P:GO:0043007; P:GO:0044419; P:GO:0045892; P:GO:1900239; P:GO:1900429; P:GO:1990414; P:GO:2001032; F:GO:0032931; C:GO:0005634	P:regulation of transcription by RNA polymerase II; P:retrotransposon silencing; P:internal peptidyl-lysine acetylation; P:pericentric heterochromatin formation; P:maintenance of rDNA; P:biological process involved in interspecies interaction between organisms; P:negative regulation of DNA-templated transcription; P:regulation of phenotypic switching; P:negative regulation of filamentous growth o…	EC:2.3.1.48	histone acetyltransferase
g1041.t1	KAF5360789.1hypothetical protein D9756_004778	3	0	94.29	18	P:GO:0006097; P:GO:0006099; P:GO:0006805; P:GO:0009062; P:GO:0015976; P:GO:0017001; P:GO:0045733; F:GO:0004451; F:GO:0046421; F:GO:0046872; C:GO:0005782; C:GO:0009514	P:glyoxylate cycle; P:tricarboxylic acid cycle; P:xenobiotic metabolic process; P:fatty acid catabolic process; P:carbon utilization; P:antibiotic catabolic process; P:acetate catabolic process; F:isocitrate lyase activity; F:methylisocitrate lyase activity; F:metal ion binding; C:peroxisomal matrix; C:glyoxysome	EC:4.1.3.1; EC:4.1.3.30	isocitrate lyase; methylisocitrate lyase
g1042.t1	KAF5360578.1hypothetical protein D9756_004779	3	3.49e-145	80.34	22	P:GO:0034329; P:GO:0044396; P:GO:0051016; P:GO:0110055; P:GO:1902404; P:GO:1903475; P:GO:2000601; P:GO:2000813; F:GO:0003779; F:GO:0051015; C:GO:0005829; C:GO:0005884; C:GO:0005886; C:GO:0005934; C:GO:0005935; C:GO:0008290; C:GO:0030018; C:GO:0030479; C:GO:0043332; C:GO:0071203; C:GO:0099568	P:cell junction assembly; P:actin cortical patch organization; P:barbed-end actin filament capping; P:negative regulation of actin filament annealing; P:mitotic actomyosin contractile ring contraction; P:mitotic actomyosin contractile ring assembly; P:positive regulation of Arp2/3 complex-mediated actin nucleation; P:negative regulation of barbed-end actin filament capping; F:actin binding; F:act…
g1043.t1	KAF5360730.1hypothetical protein D9756_004780	3	0	98.47	25	P:GO:0000244; P:GO:0000350; P:GO:0000389; P:GO:0000398; P:GO:0006508; P:GO:0070647; F:GO:0000386; F:GO:0003729; F:GO:0004843; F:GO:0008237; F:GO:0017070; F:GO:0030619; F:GO:0030620; F:GO:0030623; F:GO:0097157; F:GO:1901363; C:GO:0000974; C:GO:0005681; C:GO:0005682; C:GO:0046540; C:GO:0071013; C:GO:0071014	P:spliceosomal tri-snRNP complex assembly; P:generation of catalytic spliceosome for second transesterification step; P:mRNA 3'-splice site recognition; P:mRNA splicing, via spliceosome; P:proteolysis; P:protein modification by small protein conjugation or removal; F:second spliceosomal transesterification activity; F:mRNA binding; F:cysteine-type deubiquitinase activity; F:metallopeptidase activ…	EC:3.4.19.12	ubiquitinyl hydrolase 1
g1044.t1	KAF5354670.1hypothetical protein D9756_005377	3	0	89.84	10	P:GO:0000184; P:GO:0006310; P:GO:0043928; P:GO:0070478; F:GO:0003723; C:GO:0005737; C:GO:0035145; C:GO:1990904	P:nuclear-transcribed mRNA catabolic process, nonsense-mediated decay; P:DNA recombination; P:obsolete exonucleolytic catabolism of deadenylated mRNA; P:nuclear-transcribed mRNA catabolic process, 3'-5' exonucleolytic nonsense-mediated decay; F:RNA binding; C:cytoplasm; C:exon-exon junction complex; C:ribonucleoprotein complex
g1045.t1	KAF5354670.1hypothetical protein D9756_005377	3	7.25e-85	76.53	10	P:GO:0000184; P:GO:0006310; P:GO:0043928; P:GO:0070478; F:GO:0003723; C:GO:0005737; C:GO:0035145; C:GO:1990904	P:nuclear-transcribed mRNA catabolic process, nonsense-mediated decay; P:DNA recombination; P:obsolete exonucleolytic catabolism of deadenylated mRNA; P:nuclear-transcribed mRNA catabolic process, 3'-5' exonucleolytic nonsense-mediated decay; F:RNA binding; C:cytoplasm; C:exon-exon junction complex; C:ribonucleoprotein complex
g1046.t1	KAF5354663.1hypothetical protein D9756_005378	3	1.37e-200	70.39	1	P:GO:0000077	P:DNA damage checkpoint signaling
g1047.t1	KAF5354663.1hypothetical protein D9756_005378	3	2.35e-33	89.45	1	P:GO:0000077	P:DNA damage checkpoint signaling
g1048.t1	KAF5354662.1hypothetical protein D9756_005379	3	8.62e-172	84.38	1	P:GO:0006629	P:lipid metabolic process
g1049.t1	KAJ3570271.1hypothetical protein NP233_g4512	3	8.98e-165	81.51	1	F:GO:0016787	F:hydrolase activity	EC:3	Hydrolases
g1050.t1	KAF5354982.1hypothetical protein D9756_005384	3	0	96.26	14	P:GO:0006457; P:GO:0006458; P:GO:0061077; F:GO:0005524; F:GO:0016887; F:GO:0051082; F:GO:0140662; C:GO:0005832; C:GO:0005856	P:protein folding; P:'de novo' protein folding; P:chaperone-mediated protein folding; F:ATP binding; F:ATP hydrolysis activity; F:unfolded protein binding; F:ATP-dependent protein folding chaperone; C:chaperonin-containing T-complex; C:cytoskeleton	EC:3.6.1.15	nucleoside-triphosphate phosphatase
g1051.t1	KAF5354983.1hypothetical protein D9756_005385	3	0	70.47	10	P:GO:0007095; P:GO:0008104; P:GO:0018022; P:GO:0031507; P:GO:0045892; P:GO:0051276; F:GO:0031491; F:GO:0042799; C:GO:0000228; C:GO:0000785	P:mitotic G2 DNA damage checkpoint signaling; P:protein localization; P:peptidyl-lysine methylation; P:heterochromatin formation; P:negative regulation of DNA-templated transcription; P:chromosome organization; F:nucleosome binding; F:histone H4K20 methyltransferase activity; C:nuclear chromosome; C:chromatin	EC:2.1.1	Transferring one-carbon groups
g1052.t1	KXN85353.1Ribosomal RNA-processing protein 17	3	3.98e-36	75.65	1	C:GO:0005634	C:nucleus
g1053.t1	KAF5360692.1hypothetical protein D9756_005032	3	0	93.3	15	P:GO:0006235; P:GO:0006240; P:GO:0006260; P:GO:0009202; P:GO:0009263; P:GO:0016310; P:GO:0046131; P:GO:0046704; F:GO:0004550; F:GO:0004748; F:GO:0005524; F:GO:0051063; C:GO:0005971	P:dTTP biosynthetic process; P:dCDP biosynthetic process; P:DNA replication; P:deoxyribonucleoside triphosphate biosynthetic process; P:deoxyribonucleotide biosynthetic process; P:phosphorylation; P:pyrimidine ribonucleoside metabolic process; P:CDP metabolic process; F:nucleoside diphosphate kinase activity; F:ribonucleoside-diphosphate reductase activity, thioredoxin disulfide as acceptor; F:AT…	EC:2.7.4.6; EC:1.17.4.1	nucleoside-diphosphate kinase; ribonucleoside-diphosphate reductase
g1054.t1	KAF5360890.1hypothetical protein D9756_005039	3	1.87e-145	82.05	1	F:GO:0016491	F:oxidoreductase activity	EC:1	Oxidoreductases
g1055.t1	KAF5360596.1hypothetical protein D9756_005040	3	7.54e-221	84.87
g1056.t1	KAF5360595.1hypothetical protein D9756_005041	3	6.27e-97	81.16
g1057.t1	KAF5360504.1hypothetical protein D9756_005022	3	5.62e-92	89.21	1	P:GO:0009058	P:biosynthetic process
g1058.t1	KAF5360971.1hypothetical protein D9756_005019	3	7.4e-247	95.74	14	P:GO:0007034; P:GO:0007035; P:GO:0015988; P:GO:0045851; P:GO:0098771; P:GO:1902600; F:GO:0008553; F:GO:0016887; F:GO:0046961; C:GO:0000220; C:GO:0000329; C:GO:0005765; C:GO:0033179	P:vacuolar transport; P:vacuolar acidification; P:energy coupled proton transmembrane transport, against electrochemical gradient; P:pH reduction; P:inorganic ion homeostasis; P:proton transmembrane transport; F:P-type proton-exporting transporter activity; F:ATP hydrolysis activity; F:proton-transporting ATPase activity, rotational mechanism; C:vacuolar proton-transporting V-type ATPase, V0 doma…	EC:7.1.2.1; EC:7.2.2; EC:3.6.1.15	P-type H(+)-exporting transporter; Catalysing the translocation of inorganic cations; nucleoside-triphosphate phosphatase
g1060.t1	KAF5357075.1hypothetical protein D9756_006778	3	0	81.51	6	P:GO:0006099; F:GO:0004591; F:GO:0030976	P:tricarboxylic acid cycle; F:oxoglutarate dehydrogenase (succinyl-transferring) activity; F:thiamine pyrophosphate binding	EC:1.2.4.2	oxoglutarate dehydrogenase (succinyl-transferring)
g1061.t1	KAF5357070.1hypothetical protein D9756_006773	3	4.31e-290	93.09	10	P:GO:0002181; P:GO:0006420; P:GO:0019752; P:GO:0070144; F:GO:0004814; F:GO:0005524; C:GO:0005737; C:GO:0005739	P:cytoplasmic translation; P:arginyl-tRNA aminoacylation; P:carboxylic acid metabolic process; P:mitochondrial arginyl-tRNA aminoacylation; F:arginine-tRNA ligase activity; F:ATP binding; C:cytoplasm; C:mitochondrion	EC:6.1.1.19	arginine--tRNA ligase
g1062.t1	KAG5350678.1hypothetical protein C0989_009844	3	3.24e-30	79.92
g1063.t1	KAF5356798.1hypothetical protein D9756_006768	3	0	87.06	20	P:GO:0000070; P:GO:0006302; P:GO:0007062; P:GO:0043388; P:GO:0051301; P:GO:0062022; F:GO:0003680; F:GO:0005524; F:GO:0008094; F:GO:0016887; F:GO:0061775; F:GO:1990837; C:GO:0000779; C:GO:0000794; C:GO:0005634; C:GO:0008278; C:GO:0030892	P:mitotic sister chromatid segregation; P:double-strand break repair; P:sister chromatid cohesion; P:positive regulation of DNA binding; P:cell division; P:mitotic cohesin ssDNA (lagging strand) loading; F:minor groove of adenine-thymine-rich DNA binding; F:ATP binding; F:ATP-dependent activity, acting on DNA; F:ATP hydrolysis activity; F:cohesin loader activity; F:sequence-specific double-strand…	EC:3.6.1.15	nucleoside-triphosphate phosphatase
g1064.t1	KAF5356793.1hypothetical protein D9756_006767	3	3.94e-216	69.77
g1065.t1	KXN85236.1Eukaryotic translation initiation factor 2 subunit gamma	3	2.43E-314	97	17	P:GO:0001731; P:GO:0006413; P:GO:0045903; F:GO:0000049; F:GO:0003743; F:GO:0003924; F:GO:0005525; F:GO:0031369; C:GO:0005829; C:GO:0005850; C:GO:0016282; C:GO:0033290; C:GO:0043614	P:formation of translation preinitiation complex; P:translational initiation; P:positive regulation of translational fidelity; F:tRNA binding; F:translation initiation factor activity; F:GTPase activity; F:GTP binding; F:translation initiation factor binding; C:cytosol; C:eukaryotic translation initiation factor 2 complex; C:eukaryotic 43S preinitiation complex; C:eukaryotic 48S preinitiation com…	EC:3.6.1.15	nucleoside-triphosphate phosphatase
g1066.t1	KAF5353526.1hypothetical protein D9756_007998	3	7.88e-271	72.82	20	P:GO:0000727; P:GO:0001934; P:GO:0006269; P:GO:0006270; P:GO:0006271; P:GO:0030466; P:GO:0031509; P:GO:0045892; P:GO:1900264; P:GO:1903934; P:GO:2000105; F:GO:0003688; F:GO:0003697; F:GO:0003896; F:GO:0005515; F:GO:1901363; F:GO:1904931; C:GO:0000785; C:GO:0031298; C:GO:0035861	P:double-strand break repair via break-induced replication; P:positive regulation of protein phosphorylation; P:DNA replication, synthesis of primer; P:DNA replication initiation; P:DNA strand elongation involved in DNA replication; P:silent mating-type cassette heterochromatin formation; P:subtelomeric heterochromatin formation; P:negative regulation of DNA-templated transcription; P:positive re…	EC:2.7.7.6	DNA-directed RNA polymerase
g1067.t1	KAJ3574857.1hypothetical protein NP233_g1487	3	4.74e-125	94.53	21	P:GO:0001932; P:GO:0006325; P:GO:0006334; P:GO:0006335; P:GO:0006337; P:GO:0010628; P:GO:0016567; P:GO:0018393; P:GO:0030466; P:GO:0031509; P:GO:0032968; P:GO:0033554; P:GO:0045892; P:GO:0071103; P:GO:1905269; P:GO:2000758; F:GO:0042393; C:GO:0000228; C:GO:0000785; C:GO:0005634; C:GO:0005829	P:regulation of protein phosphorylation; P:chromatin organization; P:nucleosome assembly; P:DNA replication-dependent chromatin assembly; P:nucleosome disassembly; P:positive regulation of gene expression; P:protein ubiquitination; P:internal peptidyl-lysine acetylation; P:silent mating-type cassette heterochromatin formation; P:subtelomeric heterochromatin formation; P:positive regulation of tra…
g1068.t1	KAJ3576823.1hypothetical protein NP233_g158	3	3.08e-73	79.75	2	P:GO:0008299; F:GO:0016740	P:isoprenoid biosynthetic process; F:transferase activity	EC:2.5.1.83; EC:2.5.1.82	hexaprenyl-diphosphate synthase [(2E,6E)-farnesyl-diphosphate specific]; hexaprenyl diphosphate synthase [geranylgeranyl-diphosphate specific]
g1069.t1	KAF5362276.1hypothetical protein D9756_002203	3	4.66e-190	85.51	2	P:GO:0055085; C:GO:0016020	P:transmembrane transport; C:membrane
g1070.t1	KAF5360831.1hypothetical protein D9756_004712	3	0	82.64	8	P:GO:0007120; P:GO:0007121; P:GO:0065009; F:GO:0005085; F:GO:0031267; C:GO:0000131; C:GO:0005622; C:GO:0005935	P:axial cellular bud site selection; P:bipolar cellular bud site selection; P:regulation of molecular function; F:guanyl-nucleotide exchange factor activity; F:small GTPase binding; C:incipient cellular bud site; C:intracellular anatomical structure; C:cellular bud neck
g1071.t1	KAF5364338.1hypothetical protein D9756_000189	3	4.63e-78	54.84
g1072.t1	KAF5363748.1hypothetical protein D9756_000190	3	0	85.18	2	F:GO:0004722	F:protein serine/threonine phosphatase activity	EC:3.1.3.16	protein-serine/threonine phosphatase
g1073.t1	KAF5363746.1hypothetical protein D9756_000192	3	0	72.13	3	F:GO:0008233; F:GO:0101005; C:GO:0005730	F:peptidase activity; F:deubiquitinase activity; C:nucleolus	EC:3.4	Acting on peptide bonds (peptidases)
g1074.t1	KAJ3574781.1hypothetical protein NP233_g1520	3	1.2e-232	93.72	6	P:GO:0005975; F:GO:0004553; C:GO:0016020	P:carbohydrate metabolic process; F:hydrolase activity, hydrolyzing O-glycosyl compounds; C:membrane	EC:3.2.1	Glycosylases
g1075.t1	KAJ3574797.1hypothetical protein NP233_g1521	3	2.07e-285	65.93	14	P:GO:0006325; P:GO:0007088; P:GO:0018107; P:GO:0033047; P:GO:0035556; P:GO:0072356; F:GO:0004672; F:GO:0005524; F:GO:0072354; C:GO:0000228; C:GO:0005721; C:GO:0005737; C:GO:0031934; C:GO:0099115	P:chromatin organization; P:regulation of mitotic nuclear division; P:peptidyl-threonine phosphorylation; P:regulation of mitotic sister chromatid segregation; P:intracellular signal transduction; P:chromosome passenger complex localization to kinetochore; F:protein kinase activity; F:ATP binding; F:histone H3T3 kinase activity; C:nuclear chromosome; C:pericentric heterochromatin; C:cytoplasm; C:…	EC:2.7.11.1	non-specific serine/threonine protein kinase
g1076.t1	KAF5363995.1hypothetical protein D9756_000197	3	0	83.44	4	P:GO:0005975; F:GO:0004565	P:carbohydrate metabolic process; F:beta-galactosidase activity	EC:3.2.1.23	beta-galactosidase
g1077.t1	KAF5361977.1hypothetical protein D9756_002345	3	1.61e-173	86.23	15	P:GO:0006378; P:GO:0006397; P:GO:0016567; F:GO:0003676; F:GO:0008270; F:GO:0036002; F:GO:0061630; F:GO:1901363; C:GO:0005634; C:GO:0005654; C:GO:0005829; C:GO:0005847	P:obsolete mRNA polyadenylation; P:mRNA processing; P:protein ubiquitination; F:nucleic acid binding; F:zinc ion binding; F:pre-mRNA binding; F:ubiquitin protein ligase activity; F:heterocyclic compound binding; C:nucleus; C:nucleoplasm; C:cytosol; C:mRNA cleavage and polyadenylation specificity factor complex	EC:2.3.2	Acyltransferases
g1078.t1	KAF5361978.1hypothetical protein D9756_002344	3	0	94.29	7	P:GO:0006696; P:GO:0016126; P:GO:0044249; F:GO:0000246; F:GO:0016628; C:GO:0005789; C:GO:0016020	P:ergosterol biosynthetic process; P:sterol biosynthetic process; P:cellular biosynthetic process; F:delta24(24-1) sterol reductase activity; F:oxidoreductase activity, acting on the CH-CH group of donors, NAD or NADP as acceptor; C:endoplasmic reticulum membrane; C:membrane	EC:1.3.1.71	Delta(24(24(1)))-sterol reductase
g1079.t1	KAJ3565796.1hypothetical protein NP233_g7421	3	2.01e-66	83.8	1	C:GO:0005622	C:intracellular anatomical structure
g1082.t1	KAF5347343.1hypothetical protein D9756_009959	3	1.09e-48	61.76	14	P:GO:0000122; P:GO:0006468; P:GO:0010515; P:GO:0010629; P:GO:0035556; P:GO:0042308; P:GO:0051447; P:GO:0060240; P:GO:0090087; P:GO:1902808; P:GO:1904590; F:GO:0004674; F:GO:0005524; C:GO:0005634	P:negative regulation of transcription by RNA polymerase II; P:protein phosphorylation; P:negative regulation of induction of conjugation with cellular fusion; P:negative regulation of gene expression; P:intracellular signal transduction; P:negative regulation of protein import into nucleus; P:negative regulation of meiotic cell cycle; P:negative regulation of signal transduction involved in conj…	EC:2.7.11.1	non-specific serine/threonine protein kinase
g1083.t1	CAA7267881.1unnamed protein product	3	1.6e-117	69.35	1	F:GO:0003824	F:catalytic activity
g1084.t1	KAF9453576.1NAD(P)-binding protein	3	7.49e-158	78.45	2	P:GO:0042843; F:GO:0047837	P:D-xylose catabolic process; F:D-xylose 1-dehydrogenase (NADP+) activity	EC:1.1.1.179	D-xylose 1-dehydrogenase (NADP(+), D-xylono-1,5-lactone-forming)
g1085.t1	KAF5362080.1hypothetical protein D9756_002446	3	1.91e-82	80.62	1	P:GO:0006144	P:purine nucleobase metabolic process
g1086.t1	KAJ3569045.1hypothetical protein NP233_g5313	3	5.88e-46	73.31
g1087.t1	KAJ3569040.1hypothetical protein NP233_g5314	3	3.3e-244	95.58	22	P:GO:0006357; P:GO:0006360; P:GO:0008104; P:GO:0010628; P:GO:0032147; P:GO:0032968; P:GO:0034402; P:GO:0036031; P:GO:0070817; P:GO:1904031; F:GO:0004693; F:GO:0005524; F:GO:0008353; F:GO:0019912; C:GO:0000228; C:GO:0000785; C:GO:0005829; C:GO:0019907; C:GO:0070985	P:regulation of transcription by RNA polymerase II; P:transcription by RNA polymerase I; P:protein localization; P:positive regulation of gene expression; P:activation of protein kinase activity; P:positive regulation of transcription elongation by RNA polymerase II; P:obsolete recruitment of 3'-end processing factors to RNA polymerase II holoenzyme complex; P:obsolete recruitment of mRNA capping…	EC:2.7.11.23; EC:2.7.11.1; EC:2.7.11.22	[RNA-polymerase]-subunit kinase; non-specific serine/threonine protein kinase; cyclin-dependent kinase
g1088.t1	KAF5362079.1hypothetical protein D9756_002449	3	3.78e-32	58.44	2	F:GO:0016874; F:GO:0046872	F:ligase activity; F:metal ion binding
g1089.t1	KAF5362519.1hypothetical protein D9756_002450	3	1.09e-100	91.57	1	C:GO:0016020	C:membrane
g1090.t1	KAF5362523.1hypothetical protein D9756_002454	3	1.28e-96	86.99	6	P:GO:0016311; F:GO:0004725; F:GO:0008138	P:dephosphorylation; F:protein tyrosine phosphatase activity; F:protein tyrosine/serine/threonine phosphatase activity	EC:3.1.3.48	protein-tyrosine-phosphatase
g1091.t1	KAF5362522.1hypothetical protein D9756_002455	3	8.43e-135	85.64	8	P:GO:0006357; F:GO:0003712; C:GO:0016591; C:GO:0016592; C:GO:0070847	P:regulation of transcription by RNA polymerase II; F:transcription coregulator activity; C:RNA polymerase II, holoenzyme; C:mediator complex; C:core mediator complex
g1092.t1	KAF5362524.1hypothetical protein D9756_002457	3	9.83e-302	79.35	2	F:GO:0016787	F:hydrolase activity	EC:3	Hydrolases
g1093.t1	KAF9453574.1hypothetical protein P691DRAFT_792263	3	6.45e-97	74.92	14	P:GO:0006879; P:GO:0007005; P:GO:0008152; P:GO:0015833; P:GO:0017038; P:GO:0034599; P:GO:0045041; P:GO:0065002; P:GO:0065008; F:GO:0003756; F:GO:0016971; F:GO:0016972; F:GO:0050660; C:GO:0005758	P:intracellular iron ion homeostasis; P:mitochondrion organization; P:metabolic process; P:peptide transport; P:protein import; P:cellular response to oxidative stress; P:protein import into mitochondrial intermembrane space; P:intracellular protein transmembrane transport; P:regulation of biological quality; F:protein disulfide isomerase activity; F:flavin-dependent sulfhydryl oxidase activity; …	EC:5.3.4.1; EC:1.8.3.2	protein disulfide-isomerase; thiol oxidase
g1094.t1	KAF5362516.1hypothetical protein D9756_002459	3	0	86.4	2	F:GO:0016746	F:acyltransferase activity	EC:2.3	Acyltransferases
g1095.t1	KAF5352633.1hypothetical protein D9756_005998	3	1.24e-256	86.1	3	P:GO:0055085; F:GO:0022857; C:GO:0016020	P:transmembrane transport; F:transmembrane transporter activity; C:membrane
g1096.t1	KAF5352641.1hypothetical protein D9756_005996	3	5.6e-85	81.73	2	F:GO:0016772	F:transferase activity, transferring phosphorus-containing groups	EC:2.7	Transferring phosphorus-containing groups
g1097.t1	KAF5352636.1hypothetical protein D9756_005993	3	0	98.39	21	P:GO:0006351; P:GO:0006366; P:GO:0031048; P:GO:0045892; P:GO:0051276; F:GO:0003677; F:GO:0003729; F:GO:0003899; F:GO:0032549; F:GO:0046872; C:GO:0000228; C:GO:0000428; C:GO:0005665; C:GO:0005721; C:GO:0005739; C:GO:0010494; C:GO:1990904	P:DNA-templated transcription; P:transcription by RNA polymerase II; P:regulatory ncRNA-mediated heterochromatin formation; P:negative regulation of DNA-templated transcription; P:chromosome organization; F:DNA binding; F:mRNA binding; F:DNA-directed 5'-3' RNA polymerase activity; F:ribonucleoside binding; F:metal ion binding; C:nuclear chromosome; C:DNA-directed RNA polymerase complex; C:RNA pol…	EC:2.7.7.6	DNA-directed RNA polymerase
g1098.t1	KAF5352637.1hypothetical protein D9756_005992	3	2.48e-197	90.75	4	P:GO:0007166; F:GO:0038023; C:GO:0005886; C:GO:0016020	P:cell surface receptor signaling pathway; F:signaling receptor activity; C:plasma membrane; C:membrane
g1099.t1	KAJ3573041.1hypothetical protein NP233_g2677	3	7.83e-277	90.21	15	P:GO:0000422; P:GO:0006897; P:GO:0015031; P:GO:0015833; P:GO:0016050; P:GO:0032258; P:GO:0034498; P:GO:0034727; F:GO:0032266; F:GO:0035091; F:GO:0043168; C:GO:0000407; C:GO:0005769; C:GO:0005829; C:GO:0019898	P:autophagy of mitochondrion; P:endocytosis; P:protein transport; P:peptide transport; P:vesicle organization; P:cytoplasm to vacuole targeting by the Cvt pathway; P:early endosome to Golgi transport; P:piecemeal microautophagy of the nucleus; F:phosphatidylinositol-3-phosphate binding; F:phosphatidylinositol binding; F:anion binding; C:phagophore assembly site; C:early endosome; C:cytosol; C:ext…
g1100.t1	KAF5352635.1hypothetical protein D9756_005990	3	4.04e-111	78.76	6	P:GO:0042276; P:GO:0043504; P:GO:0070987; C:GO:0005739; C:GO:0016035; C:GO:0043596	P:error-prone translesion synthesis; P:mitochondrial DNA repair; P:error-free translesion synthesis; C:mitochondrion; C:zeta DNA polymerase complex; C:nuclear replication fork
g1101.t1	KAF5352362.1hypothetical protein D9756_005987	3	2.51e-214	62.07	3	P:GO:0016310; F:GO:0016301; C:GO:0031966	P:phosphorylation; F:kinase activity; C:mitochondrial membrane	EC:2.7	Transferring phosphorus-containing groups
g1102.t1	KAF5352361.1hypothetical protein D9756_005986	3	8.63e-215	79.66	2	F:GO:0016740	F:transferase activity	EC:2	Transferases
g1103.t1	KAJ3568673.1hypothetical protein NP233_g5555	2	1.12e-18	61.49
g1104.t1	KAF5356853.1hypothetical protein D9756_006788	3	0	82.99	45	P:GO:0000712; P:GO:0006468; P:GO:0007096; P:GO:0010628; P:GO:0010696; P:GO:0010971; P:GO:0016310; P:GO:0031031; P:GO:0031331; P:GO:0031670; P:GO:0031991; P:GO:0032436; P:GO:0043085; P:GO:0045144; P:GO:0045793; P:GO:0045842; P:GO:0045944; P:GO:0046579; P:GO:0046827; P:GO:0051307; P:GO:0051455; P:GO:0051495; P:GO:0062033; P:GO:0070194; P:GO:0070507; P:GO:0090087; P:GO:0090306; P:GO:0110020; P:GO:19…	P:resolution of meiotic recombination intermediates; P:protein phosphorylation; P:regulation of exit from mitosis; P:positive regulation of gene expression; P:positive regulation of mitotic spindle pole body separation; P:positive regulation of G2/M transition of mitotic cell cycle; P:phosphorylation; P:positive regulation of septation initiation signaling; P:positive regulation of cellular catab…	EC:2.7.11.1	non-specific serine/threonine protein kinase
g1105.t1	KAF5357177.1hypothetical protein D9756_006793	3	0	87.38	21	P:GO:0000280; P:GO:0006508; P:GO:0006915; P:GO:0006974; P:GO:0031536; P:GO:0032515; P:GO:0032888; P:GO:0045840; P:GO:0051306; P:GO:0051307; P:GO:0060236; P:GO:0098813; F:GO:0004197; C:GO:0005634; C:GO:0005739; C:GO:0044732; C:GO:1990023; C:GO:1990520	P:nuclear division; P:proteolysis; P:apoptotic process; P:DNA damage response; P:positive regulation of exit from mitosis; P:negative regulation of phosphoprotein phosphatase activity; P:regulation of mitotic spindle elongation; P:positive regulation of mitotic nuclear division; P:mitotic sister chromatid separation; P:meiotic chromosome separation; P:regulation of mitotic spindle organization; P…	EC:3.4.22	Acting on peptide bonds (peptidases)
g1106.t1	KAF5360682.1hypothetical protein D9756_004866	3	3.68e-107	89.84	5	P:GO:0007034; P:GO:0015031; P:GO:0043162; P:GO:0072666; C:GO:0000813	P:vacuolar transport; P:protein transport; P:ubiquitin-dependent protein catabolic process via the multivesicular body sorting pathway; P:establishment of protein localization to vacuole; C:ESCRT I complex
g1107.t1	CDJ79834.1alpha-galactosidase precursor	3	6.26e-276	85.23	6	P:GO:0005975; F:GO:0004557; C:GO:0016020	P:carbohydrate metabolic process; F:alpha-galactosidase activity; C:membrane	EC:3.2.1.22	alpha-galactosidase
g1108.t1	KAF5360686.1hypothetical protein D9756_004862	3	3.25e-290	95.64	19	P:GO:0010628; P:GO:0031331; P:GO:0032436; P:GO:0036503; P:GO:0045842; P:GO:0045899; P:GO:0051781; P:GO:0062033; P:GO:0070682; F:GO:0005524; F:GO:0016887; F:GO:0017025; F:GO:0036402; C:GO:0008540; C:GO:0031595; C:GO:0031597	P:positive regulation of gene expression; P:positive regulation of cellular catabolic process; P:positive regulation of proteasomal ubiquitin-dependent protein catabolic process; P:ERAD pathway; P:positive regulation of mitotic metaphase/anaphase transition; P:positive regulation of RNA polymerase II transcription preinitiation complex assembly; P:positive regulation of cell division; P:positive …	EC:5.6.1.5; EC:3.6.1.15	proteasome ATPase; nucleoside-triphosphate phosphatase
g1109.t1	KAF5361037.1hypothetical protein D9756_004858	3	1.02e-242	84.13	4	F:GO:0004674; F:GO:0005524	F:protein serine/threonine kinase activity; F:ATP binding	EC:2.7.11.1	non-specific serine/threonine protein kinase
g1110.t1	KAJ3561299.1hypothetical protein NP233_g10275	3	1.61e-237	91.41	13	P:GO:0008643; P:GO:0015786; P:GO:0055085; P:GO:0072334; P:GO:0098656; F:GO:0005459; F:GO:0005460; F:GO:0008509; C:GO:0000139; C:GO:0005789; C:GO:0016020; C:GO:0098791	P:carbohydrate transport; P:UDP-glucose transmembrane transport; P:transmembrane transport; P:UDP-galactose transmembrane transport; P:monoatomic anion transmembrane transport; F:UDP-galactose transmembrane transporter activity; F:UDP-glucose transmembrane transporter activity; F:monoatomic anion transmembrane transporter activity; C:Golgi membrane; C:endoplasmic reticulum membrane; C:membrane; C…
g1111.t1	KAF5361043.1hypothetical protein D9756_004856	3	6.59e-134	89.5	6	P:GO:0016311; F:GO:0004725; F:GO:0008138	P:dephosphorylation; F:protein tyrosine phosphatase activity; F:protein tyrosine/serine/threonine phosphatase activity	EC:3.1.3.48	protein-tyrosine-phosphatase
g1112.t1	KAF5361044.1hypothetical protein D9756_004855	3	1.54e-97	90.86	3	F:GO:0016787; C:GO:0005737	F:hydrolase activity; C:cytoplasm	EC:3	Hydrolases
g1113.t1	KAF5360776.1hypothetical protein D9756_004854	3	1.15e-297	83.35	10	P:GO:0006273; P:GO:0016233; P:GO:0060249; P:GO:0065008; P:GO:1902975; P:GO:1902981; F:GO:0046982; C:GO:0000785; C:GO:0005635; C:GO:0005658	P:lagging strand elongation; P:telomere capping; P:anatomical structure homeostasis; P:regulation of biological quality; P:mitotic DNA replication initiation; P:obsolete synthesis of RNA primer involved in mitotic DNA replication; F:protein heterodimerization activity; C:chromatin; C:nuclear envelope; C:alpha DNA polymerase:primase complex
g1114.t1	KAJ3561658.1hypothetical protein NP233_g10060	3	1.67e-178	86.83	2	F:GO:0016491	F:oxidoreductase activity	EC:1	Oxidoreductases
g1115.t1	KXN86121.11,4-alpha-glucan-branching enzyme	3	0	92.08	11	P:GO:0005978; F:GO:0003844; F:GO:0004553; F:GO:0043169; F:GO:0102752; C:GO:0005737	P:glycogen biosynthetic process; F:1,4-alpha-glucan branching enzyme activity; F:hydrolase activity, hydrolyzing O-glycosyl compounds; F:cation binding; F:1,4-alpha-glucan branching enzyme activity (using a glucosylated glycogenin as primer for glycogen synthesis); C:cytoplasm	EC:2.4.1.18; EC:3.2.1	1,4-alpha-glucan branching enzyme; Glycosylases
g1116.t1	KAF5363524.1hypothetical protein D9756_000157	3	7.68e-177	78.45	1	C:GO:0016020	C:membrane
g1117.t1	KAF5363681.1hypothetical protein D9756_000158	3	2.04e-199	59.67	2	P:GO:0006629; F:GO:0008081	P:lipid metabolic process; F:phosphoric diester hydrolase activity
g1118.t1	KAF5363682.1hypothetical protein D9756_000159	3	6.31e-186	83.69	4	P:GO:0006629; F:GO:0008081	P:lipid metabolic process; F:phosphoric diester hydrolase activity	EC:3.1.4	Acting on ester bonds
g1119.t1	KAJ3563201.1hypothetical protein NP233_g9092	3	7.85e-114	80.34	6	P:GO:0006629; P:GO:0046474; F:GO:0003841; F:GO:0016746; C:GO:0005789; C:GO:0005811	P:lipid metabolic process; P:glycerophospholipid biosynthetic process; F:1-acylglycerol-3-phosphate O-acyltransferase activity; F:acyltransferase activity; C:endoplasmic reticulum membrane; C:lipid droplet	EC:2.3.1.51	1-acylglycerol-3-phosphate O-acyltransferase
g1120.t1	KAF9448997.1hypothetical protein P691DRAFT_590675	3	2.55e-76	54.97
g1121.t1	KAF7762716.1transcriptional regulator family: Zinc finger, CCHC-type	3	2.84e-304	69.72	4	P:GO:0015074; F:GO:0003676; F:GO:0003723; C:GO:0005634	P:DNA integration; F:nucleic acid binding; F:RNA binding; C:nucleus
g1122.t1	KAF5351870.1hypothetical protein D9756_007579	3	1.01e-120	78.3
g1123.t1	KAF5351739.1hypothetical protein D9756_007580	3	0	90.15	12	P:GO:0010628; P:GO:0045944; P:GO:1900735; F:GO:0000978; F:GO:0001228; F:GO:1901363; C:GO:0000228; C:GO:0000785; C:GO:0005634	P:positive regulation of gene expression; P:positive regulation of transcription by RNA polymerase II; P:positive regulation of flocculation; F:RNA polymerase II cis-regulatory region sequence-specific DNA binding; F:DNA-binding transcription activator activity, RNA polymerase II-specific; F:heterocyclic compound binding; C:nuclear chromosome; C:chromatin; C:nucleus
g1124.t1	KAF5351740.1hypothetical protein D9756_007581	3	4.41e-159	83.47	31	P:GO:0000183; P:GO:0006302; P:GO:0006338; P:GO:0006355; P:GO:0016239; P:GO:0018393; P:GO:0031452; P:GO:0031453; P:GO:0032968; P:GO:0034508; P:GO:0034728; P:GO:0044182; P:GO:0045005; P:GO:0045892; P:GO:0051726; P:GO:1900376; P:GO:2000104; P:GO:2001251; F:GO:0004402; F:GO:0010485; F:GO:0044016; F:GO:0106226; F:GO:0140064; C:GO:0000228; C:GO:0005634; C:GO:0005654; C:GO:0005721; C:GO:0032777; C:GO:00…	P:rDNA heterochromatin formation; P:double-strand break repair; P:chromatin remodeling; P:regulation of DNA-templated transcription; P:positive regulation of macroautophagy; P:internal peptidyl-lysine acetylation; P:negative regulation of heterochromatin formation; P:positive regulation of heterochromatin formation; P:positive regulation of transcription elongation by RNA polymerase II; P:centrom…	EC:2.3.1.48	histone acetyltransferase
g1125.t1	PPR05848.1hypothetical protein CVT26_010128	3	0	73.39	14	P:GO:0000463; P:GO:0006364; P:GO:0010501; F:GO:0003723; F:GO:0003724; F:GO:0005524; F:GO:0016887; C:GO:0005730; C:GO:0005737	P:maturation of LSU-rRNA from tricistronic rRNA transcript (SSU-rRNA, 5.8S rRNA, LSU-rRNA); P:rRNA processing; P:RNA secondary structure unwinding; F:RNA binding; F:RNA helicase activity; F:ATP binding; F:ATP hydrolysis activity; C:nucleolus; C:cytoplasm	EC:3.6.4.13; EC:3.6.1.15	RNA helicase; nucleoside-triphosphate phosphatase
g1126.t1	KAF5351743.1hypothetical protein D9756_007585	3	1.35e-256	68.75	24	P:GO:0000122; P:GO:0006338; P:GO:0007131; P:GO:0010515; P:GO:0010628; P:GO:0010629; P:GO:0018393; P:GO:0032968; P:GO:0051276; P:GO:1903960; P:GO:1904063; P:GO:1905533; P:GO:2000242; F:GO:0003713; F:GO:0036408; F:GO:0043992; F:GO:0070577; C:GO:0000124; C:GO:0000228; C:GO:0000775; C:GO:0005654; C:GO:0005829; C:GO:0046695; C:GO:1902562	P:negative regulation of transcription by RNA polymerase II; P:chromatin remodeling; P:reciprocal meiotic recombination; P:negative regulation of induction of conjugation with cellular fusion; P:positive regulation of gene expression; P:negative regulation of gene expression; P:internal peptidyl-lysine acetylation; P:positive regulation of transcription elongation by RNA polymerase II; P:chromoso…	EC:2.3.1.48	histone acetyltransferase
g1127.t1	KAH8107245.1NAD-dependent formate dehydrogenase	3	1.75e-231	94.51	10	P:GO:0042183; F:GO:0008863; F:GO:0016616; F:GO:0051287; C:GO:0005737	P:formate catabolic process; F:formate dehydrogenase (NAD+) activity; F:oxidoreductase activity, acting on the CH-OH group of donors, NAD or NADP as acceptor; F:NAD binding; C:cytoplasm	EC:1.1.1; EC:1.17.1.9; EC:1.2.1	Acting on the CH-OH group of donors; formate dehydrogenase; Acting on the aldehyde or oxo group of donors
g1128.t1	KAF5349121.1hypothetical protein D9756_009496	3	1.29e-55	70.43
g1129.t1	KAF5349263.1hypothetical protein D9756_009469	3	9e-158	71.95
g1130.t1	KAF5349149.1hypothetical protein D9756_009472	3	1.63e-296	85.87	9	P:GO:0006571; P:GO:0008652; F:GO:0004665; F:GO:0008977; F:GO:0070403; C:GO:0005737	P:tyrosine biosynthetic process; P:amino acid biosynthetic process; F:prephenate dehydrogenase (NADP+) activity; F:prephenate dehydrogenase (NAD+) activity; F:NAD+ binding; C:cytoplasm	EC:1.3.1.12; EC:1.3.1.13	prephenate dehydrogenase; prephenate dehydrogenase (NADP(+))
g1131.t1	KAF5349150.1hypothetical protein D9756_009473	3	6.4e-162	87.56	18	P:GO:0001732; P:GO:0002188; P:GO:0006415; F:GO:0003723; F:GO:0003743; F:GO:1901363; C:GO:0005852; C:GO:0010494; C:GO:0016282; C:GO:0033290; C:GO:0043614; C:GO:0071540; C:GO:0071541	P:formation of cytoplasmic translation initiation complex; P:translation reinitiation; P:translational termination; F:RNA binding; F:translation initiation factor activity; F:heterocyclic compound binding; C:eukaryotic translation initiation factor 3 complex; C:cytoplasmic stress granule; C:eukaryotic 43S preinitiation complex; C:eukaryotic 48S preinitiation complex; C:multi-eIF complex; C:eukary…
g1132.t1	KAJ3553366.1hypothetical protein NP233_g12663	3	2.61e-67	56.25
g1133.t1	KAF5358242.1hypothetical protein D9756_001666	3	1.64e-278	72.68	11	P:GO:0000289; P:GO:0006301; P:GO:0006508; P:GO:0016071; P:GO:0070647; F:GO:0004518; F:GO:0004843; C:GO:0000932; C:GO:0031251; C:GO:1990904	P:nuclear-transcribed mRNA poly(A) tail shortening; P:postreplication repair; P:proteolysis; P:mRNA metabolic process; P:protein modification by small protein conjugation or removal; F:nuclease activity; F:cysteine-type deubiquitinase activity; C:P-body; C:PAN complex; C:ribonucleoprotein complex	EC:3.1; EC:3.4.19.12	Acting on ester bonds; ubiquitinyl hydrolase 1
g1134.t1	KXN85482.1putative transporter MCH1	3	3.11e-167	83.25	6	P:GO:0055085; F:GO:0022857; C:GO:0000329; C:GO:0016020	P:transmembrane transport; F:transmembrane transporter activity; C:fungal-type vacuole membrane; C:membrane
g1135.t1	KAF5358244.1hypothetical protein D9756_001664	3	9.07e-288	90.32	5	P:GO:0042450; F:GO:0004056; C:GO:0005829	P:arginine biosynthetic process via ornithine; F:argininosuccinate lyase activity; C:cytosol	EC:4.3.2.1	argininosuccinate lyase
g1136.t1	KAF5358238.1hypothetical protein D9756_001662	3	4.4e-168	90.75	8	P:GO:0016192; P:GO:0042450; F:GO:0004056; C:GO:0016020	P:vesicle-mediated transport; P:arginine biosynthetic process via ornithine; F:argininosuccinate lyase activity; C:membrane	EC:4.3.2.1	argininosuccinate lyase
g1137.t1	KAF5358240.1hypothetical protein D9756_001660	3	5.89e-233	88.55	9	P:GO:0006103; P:GO:0006520; P:GO:0006532; P:GO:0006536; P:GO:0009058; F:GO:0004069; F:GO:0030170	P:2-oxoglutarate metabolic process; P:amino acid metabolic process; P:aspartate biosynthetic process; P:glutamate metabolic process; P:biosynthetic process; F:L-aspartate:2-oxoglutarate aminotransferase activity; F:pyridoxal phosphate binding	EC:2.6.1.1	aspartate transaminase
g1138.t1	KAF5357858.1hypothetical protein D9756_001659	3	0	69.25
g1139.t1	KAJ3575064.1hypothetical protein NP233_g1354	3	1.27e-155	85.29	6	P:GO:0006559; F:GO:0016841; C:GO:0005737	P:L-phenylalanine catabolic process; F:ammonia-lyase activity; C:cytoplasm	EC:4.3.1	Carbon-nitrogen lyases
g1140.t1	KAF7782685.1hypothetical protein Agabi119p4_2061	3	1.23e-194	73.81	2	F:GO:0016491	F:oxidoreductase activity	EC:1	Oxidoreductases
g1141.t1	KAF5354860.1hypothetical protein D9756_005443	3	0	95.36	12	P:GO:0000050; P:GO:0006207; P:GO:0006526; P:GO:1901564; F:GO:0004087; F:GO:0004088; F:GO:0005524; F:GO:0046872; C:GO:0005951	P:urea cycle; P:'de novo' pyrimidine nucleobase biosynthetic process; P:arginine biosynthetic process; P:organonitrogen compound metabolic process; F:carbamoyl-phosphate synthase (ammonia) activity; F:carbamoyl-phosphate synthase (glutamine-hydrolyzing) activity; F:ATP binding; F:metal ion binding; C:carbamoyl-phosphate synthase complex	EC:6.3.5.5; EC:6.3.4.16	carbamoyl-phosphate synthase (glutamine-hydrolyzing); carbamoyl-phosphate synthase (ammonia)
g1142.t1	KAF5354634.1hypothetical protein D9756_005439	3	0	88.01	8	P:GO:0015833; P:GO:0030970; P:GO:0043161; P:GO:0044248; C:GO:0000838; C:GO:0000839; C:GO:0016020; C:GO:0034099	P:peptide transport; P:retrograde protein transport, ER to cytosol; P:proteasome-mediated ubiquitin-dependent protein catabolic process; P:cellular catabolic process; C:Hrd1p ubiquitin ligase ERAD-M complex; C:Hrd1p ubiquitin ligase ERAD-L complex; C:membrane; C:luminal surveillance complex
g1143.t1	KAJ3575061.1hypothetical protein NP233_g1347	3	1.67e-42	64.94	2	F:GO:0004659; F:GO:0008318	F:prenyltransferase activity; F:protein prenyltransferase activity
g1144.t1	KAF5359339.1hypothetical protein D9756_003014	3	1.16e-260	74.55
g1145.t1	KXN84870.1Acetate non-utilizing protein 9, mitochondrial	3	8.32e-52	79.95	9	P:GO:0006105; P:GO:0006111; P:GO:0006805; P:GO:0006979; P:GO:0015976; P:GO:0031323; P:GO:0034553; C:GO:0005739; C:GO:0005758	P:succinate metabolic process; P:regulation of gluconeogenesis; P:xenobiotic metabolic process; P:response to oxidative stress; P:carbon utilization; P:regulation of cellular metabolic process; P:mitochondrial respiratory chain complex II assembly; C:mitochondrion; C:mitochondrial intermembrane space
g1146.t1	KXN84871.1Cyanate hydratase, partial	3	5.89e-97	92	6	P:GO:0009439; F:GO:0003677; F:GO:0008824	P:cyanate metabolic process; F:DNA binding; F:cyanate hydratase activity	EC:4.3; EC:4.2.1.104	Carbon-nitrogen lyases; cyanase
g1147.t1	KAJ3561033.1hypothetical protein NP233_g10445	3	7.27e-46	63.29	1	F:GO:0003824	F:catalytic activity
g1149.t1	KAF7761274.1hypothetical protein Agabi119p4_10683	3	5.47e-201	73.04	4	P:GO:0015074; F:GO:0003676; F:GO:0003723; C:GO:0005634	P:DNA integration; F:nucleic acid binding; F:RNA binding; C:nucleus
g1150.t1	KAF5363873.1hypothetical protein D9756_000062	3	0	87.56	12	F:GO:0003774; F:GO:0003779; F:GO:0004100; F:GO:0005524; C:GO:0016020; C:GO:0016459	F:cytoskeletal motor activity; F:actin binding; F:chitin synthase activity; F:ATP binding; C:membrane; C:myosin complex	EC:2.4.1.16	chitin synthase
g1151.t1	KXN81855.1Putative acyl-coenzyme A synthetase	3	3.92e-264	73.19
g1152.t1	KAF5363499.1hypothetical protein D9756_000054	3	2.4e-94	66.68
g1153.t1	KAF5356950.1hypothetical protein D9756_006372	3	2.28e-66	83.13	4	P:GO:0008299; F:GO:0016740	P:isoprenoid biosynthetic process; F:transferase activity	EC:2	Transferases
g1155.t1	KAJ3572805.1hypothetical protein NP233_g2841	3	1.55e-155	88.39	7	P:GO:0006468; P:GO:1904262; F:GO:0004672; F:GO:0004674; F:GO:0005524; C:GO:0005829	P:protein phosphorylation; P:negative regulation of TORC1 signaling; F:protein kinase activity; F:protein serine/threonine kinase activity; F:ATP binding; C:cytosol	EC:2.7.11.1	non-specific serine/threonine protein kinase
g1156.t1	KXN90481.1hypothetical protein AN958_04153	3	8.49e-252	87.7	1	C:GO:0016020	C:membrane
g1157.t1	KAJ3572817.1hypothetical protein NP233_g2836	3	0	89.49	12	P:GO:0006888; P:GO:0015833; P:GO:0030036; P:GO:0032012; P:GO:0043001; P:GO:0065009; F:GO:0005085; F:GO:0051020; C:GO:0005794	P:endoplasmic reticulum to Golgi vesicle-mediated transport; P:peptide transport; P:actin cytoskeleton organization; P:regulation of ARF protein signal transduction; P:Golgi to plasma membrane protein transport; P:regulation of molecular function; F:guanyl-nucleotide exchange factor activity; F:GTPase binding; C:Golgi apparatus
g1158.t1	KAF9452839.120S proteasome subunit	3	2.62e-168	97.15	16	P:GO:0006511; P:GO:0010499; P:GO:0031331; P:GO:0032436; P:GO:0045842; P:GO:0051781; P:GO:0062033; C:GO:0005634; C:GO:0005737; C:GO:0005739; C:GO:0019773; C:GO:0031597; C:GO:0034399; C:GO:0034515; C:GO:0042175	P:ubiquitin-dependent protein catabolic process; P:proteasomal ubiquitin-independent protein catabolic process; P:positive regulation of cellular catabolic process; P:positive regulation of proteasomal ubiquitin-dependent protein catabolic process; P:positive regulation of mitotic metaphase/anaphase transition; P:positive regulation of cell division; P:positive regulation of mitotic sister chroma…
g1159.t1	KAJ3572812.1hypothetical protein NP233_g2833	3	3.13e-156	79.41	13	P:GO:0006289; P:GO:0006357; P:GO:0006367; P:GO:0016567; P:GO:0032147; P:GO:0045737; F:GO:0008270; F:GO:0061575; F:GO:0061630; C:GO:0000112; C:GO:0005634; C:GO:0070985; C:GO:1990391	P:nucleotide-excision repair; P:regulation of transcription by RNA polymerase II; P:transcription initiation at RNA polymerase II promoter; P:protein ubiquitination; P:activation of protein kinase activity; P:positive regulation of cyclin-dependent protein serine/threonine kinase activity; F:zinc ion binding; F:cyclin-dependent protein serine/threonine kinase activator activity; F:ubiquitin prote…	EC:2.3.2	Acyltransferases
g1160.t1	KAF5362164.1hypothetical protein D9756_002656	3	3.12e-67	62.14	2	C:GO:0005634; C:GO:0005737	C:nucleus; C:cytoplasm
g1161.t1	KAF5362531.1hypothetical protein D9756_002653	3	9.37e-275	77.04	1	F:GO:0016747	F:acyltransferase activity, transferring groups other than amino-acyl groups
g1162.t1	KAF5362532.1hypothetical protein D9756_002652	3	6.61e-61	78
g1163.t1	KAF5362533.1hypothetical protein D9756_002651	3	9.45e-197	67.37	1	C:GO:0016020	C:membrane
g1164.t1	XP_007327762.1hypothetical protein AGABI1DRAFT_112189	3	2.51e-84	73.47	23	P:GO:0007534; P:GO:0030466; P:GO:0031452; P:GO:0031508; P:GO:0031509; P:GO:0033696; P:GO:0044087; P:GO:0044820; P:GO:0045165; P:GO:0045892; P:GO:0071459; P:GO:2001251; F:GO:0003723; F:GO:0031492; F:GO:0035064; F:GO:0042802; F:GO:1901363; C:GO:0000779; C:GO:0000794; C:GO:0005721; C:GO:0031934; C:GO:0043229; C:GO:0099115	P:gene conversion at mating-type locus; P:silent mating-type cassette heterochromatin formation; P:negative regulation of heterochromatin formation; P:pericentric heterochromatin formation; P:subtelomeric heterochromatin formation; P:heterochromatin boundary formation; P:regulation of cellular component biogenesis; P:mitotic telomere tethering at nuclear periphery; P:cell fate commitment; P:negat…
g1165.t1	KXN87673.1RNA-binding protein 8A	3	8.07e-90	89.67	11	P:GO:0000184; P:GO:0000381; P:GO:0006396; P:GO:0045292; F:GO:0003729; F:GO:1901363; C:GO:0005634; C:GO:0005737; C:GO:0035145	P:nuclear-transcribed mRNA catabolic process, nonsense-mediated decay; P:regulation of alternative mRNA splicing, via spliceosome; P:RNA processing; P:mRNA cis splicing, via spliceosome; F:mRNA binding; F:heterocyclic compound binding; C:nucleus; C:cytoplasm; C:exon-exon junction complex
g1166.t1	KAF5351802.1hypothetical protein D9756_007537	3	4.82e-109	83.91	16	P:GO:0006260; P:GO:0006273; P:GO:0006281; P:GO:0006310; P:GO:0016070; P:GO:0051103; P:GO:0071897; F:GO:0003677; F:GO:0003910; F:GO:0005524; C:GO:0005737	P:DNA replication; P:lagging strand elongation; P:DNA repair; P:DNA recombination; P:RNA metabolic process; P:DNA ligation involved in DNA repair; P:DNA biosynthetic process; F:DNA binding; F:DNA ligase (ATP) activity; F:ATP binding; C:cytoplasm	EC:6.5.1.1	DNA ligase (ATP)
g1167.t1	KAF5351644.1hypothetical protein D9756_007540	3	3.72e-109	88.83
g1168.t1	KAJ3571700.1hypothetical protein NP233_g3586	3	8.83e-243	86.69	4	F:GO:0004672; F:GO:0005524	F:protein kinase activity; F:ATP binding	EC:2.7.1	Transferring phosphorus-containing groups
g1169.t1	XP_007332722.1hypothetical protein AGABI1DRAFT_78278, partial	3	6.7e-171	63.88	8	P:GO:0036450; P:GO:0071076; F:GO:0000287; F:GO:0002134; F:GO:0003723; F:GO:0032551; F:GO:0050265; C:GO:0005737	P:polyuridylation-dependent decapping of nuclear-transcribed mRNA; P:RNA 3' uridylation; F:magnesium ion binding; F:UTP binding; F:RNA binding; F:pyrimidine ribonucleoside binding; F:RNA uridylyltransferase activity; C:cytoplasm	EC:2.7.7.52	RNA uridylyltransferase
g1170.t1	KAF5353209.1hypothetical protein D9756_007850	3	6.74e-177	62.02	11	P:GO:0000289; P:GO:0000290; P:GO:0006301; P:GO:0010606; P:GO:0031334; F:GO:0005488; F:GO:0008143; F:GO:1901363; C:GO:0000932; C:GO:0031251; C:GO:1990904	P:nuclear-transcribed mRNA poly(A) tail shortening; P:deadenylation-dependent decapping of nuclear-transcribed mRNA; P:postreplication repair; P:positive regulation of cytoplasmic mRNA processing body assembly; P:positive regulation of protein-containing complex assembly; F:binding; F:poly(A) binding; F:heterocyclic compound binding; C:P-body; C:PAN complex; C:ribonucleoprotein complex
g1171.t1	ADV30329.1glyceraldehyde 3-phosphate dehydrogenase, partial	3	1.54e-240	94.75	23	P:GO:0006006; P:GO:0006094; P:GO:0006096; P:GO:0006754; P:GO:0006805; P:GO:0009168; P:GO:0016310; P:GO:0019359; P:GO:0034404; P:GO:0042866; P:GO:0071470; F:GO:0004365; F:GO:0050661; F:GO:0051287; C:GO:0005576; C:GO:0005618; C:GO:0005737; C:GO:0016020	P:glucose metabolic process; P:gluconeogenesis; P:glycolytic process; P:ATP biosynthetic process; P:xenobiotic metabolic process; P:purine ribonucleoside monophosphate biosynthetic process; P:phosphorylation; P:nicotinamide nucleotide biosynthetic process; P:nucleobase-containing small molecule biosynthetic process; P:pyruvate biosynthetic process; P:cellular response to osmotic stress; F:glycera…	EC:1.2.1.59; EC:1.2.1.12	glyceraldehyde-3-phosphate dehydrogenase (NAD(P)(+)) (phosphorylating); glyceraldehyde-3-phosphate dehydrogenase (phosphorylating)
g1172.t1	KAF5353205.1hypothetical protein D9756_007854	3	1.87e-305	59.83
g1173.t1	KAJ3570578.1hypothetical protein NP233_g4306	3	2.49e-139	53.54	4	P:GO:0006865; P:GO:0055085; F:GO:0022857; C:GO:0016020	P:amino acid transport; P:transmembrane transport; F:transmembrane transporter activity; C:membrane
g1174.t1	KAF7762703.1hypothetical protein Agabi119p4_9296	3	3.81e-27	62.16
g1175.t1	KAF9450303.1hypothetical protein P691DRAFT_665645, partial	3	9.32e-50	88.09	4	P:GO:0007005; P:GO:0009060; C:GO:0005634; C:GO:0005758	P:mitochondrion organization; P:aerobic respiration; C:nucleus; C:mitochondrial intermembrane space
g1176.t1	KAF5347006.1hypothetical protein D9756_011009	3	7.95e-40	63	1	F:GO:0003824	F:catalytic activity
g1177.t1	KAF5358466.1hypothetical protein D9756_001488	3	1.51e-69	74.67
g1178.t1	KAF5358458.1hypothetical protein D9756_001486	3	3.22e-128	95.19	8	P:GO:0006412; P:GO:0032543; F:GO:0000048; F:GO:0003735; C:GO:0005762; C:GO:0005840; C:GO:1990904	P:translation; P:mitochondrial translation; F:peptidyltransferase activity; F:structural constituent of ribosome; C:mitochondrial large ribosomal subunit; C:ribosome; C:ribonucleoprotein complex	EC:2.3.2.12	peptidyltransferase
g1179.t1	KAF5358459.1hypothetical protein D9756_001485	3	6.43e-227	71.18
g1180.t1	KAF9454576.1T-complex protein 1	3	0	92.37	14	P:GO:0006457; P:GO:0006458; P:GO:0061077; F:GO:0005524; F:GO:0016887; F:GO:0051082; F:GO:0140662; C:GO:0005832; C:GO:0005856	P:protein folding; P:'de novo' protein folding; P:chaperone-mediated protein folding; F:ATP binding; F:ATP hydrolysis activity; F:unfolded protein binding; F:ATP-dependent protein folding chaperone; C:chaperonin-containing T-complex; C:cytoskeleton	EC:3.6.1.15	nucleoside-triphosphate phosphatase
g1181.t1	KAJ3565010.1hypothetical protein NP233_g7916	3	5.03e-217	82.31	21	P:GO:0010628; P:GO:0015833; P:GO:0016485; P:GO:0030970; P:GO:0032933; P:GO:0034067; P:GO:0045944; P:GO:0051974; P:GO:0070651; P:GO:0071629; P:GO:1900182; P:GO:1990116; F:GO:0031593; F:GO:0032183; F:GO:0043130; C:GO:0000837; C:GO:0000839; C:GO:0005634; C:GO:0005829; C:GO:0034098; C:GO:1990112	P:positive regulation of gene expression; P:peptide transport; P:protein processing; P:retrograde protein transport, ER to cytosol; P:SREBP signaling pathway; P:protein localization to Golgi apparatus; P:positive regulation of transcription by RNA polymerase II; P:negative regulation of telomerase activity; P:nonfunctional rRNA decay; P:cytoplasm protein quality control by the ubiquitin-proteasom…
g1182.t1	KAJ3565007.1hypothetical protein NP233_g7915	3	6.24e-303	85.99	9	P:GO:0001676; P:GO:0018008; P:GO:0030010; P:GO:0044419; P:GO:0048869; F:GO:0004379; F:GO:0005488; C:GO:0005829	P:long-chain fatty acid metabolic process; P:N-terminal peptidyl-glycine N-myristoylation; P:establishment of cell polarity; P:biological process involved in interspecies interaction between organisms; P:cellular developmental process; F:glycylpeptide N-tetradecanoyltransferase activity; F:binding; C:cytosol	EC:2.3.1.97	glycylpeptide N-tetradecanoyltransferase
g1183.t1	KXN86919.1Heat shock protein 16	3	1e-66	77.32
g1184.t1	KAF5357986.1hypothetical protein D9756_001477	3	8.57e-243	82.91	1	C:GO:0016020	C:membrane
g1186.t1	KAJ3562074.1hypothetical protein NP233_g9800	3	8.91e-192	60.52	1	C:GO:0016020	C:membrane
g1187.t1	KAF5354918.1hypothetical protein D9756_005325	3	0	66.91	18	P:GO:0000019; P:GO:0000183; P:GO:0006265; P:GO:0006271; P:GO:0006357; P:GO:0006368; P:GO:0007076; P:GO:0007097; P:GO:0045892; F:GO:0003677; F:GO:0003916; F:GO:0003917; F:GO:1901363; C:GO:0000785; C:GO:0005730; C:GO:0005829; C:GO:0031298; C:GO:0043229	P:regulation of mitotic recombination; P:rDNA heterochromatin formation; P:DNA topological change; P:DNA strand elongation involved in DNA replication; P:regulation of transcription by RNA polymerase II; P:transcription elongation by RNA polymerase II; P:mitotic chromosome condensation; P:nuclear migration; P:negative regulation of DNA-templated transcription; F:DNA binding; F:DNA topoisomerase a…	EC:5.6.2.1	DNA topoisomerase
g1188.t1	KAF8844386.1ribosomal protein S12/S23	3	2.99e-89	97.86	3	P:GO:0006412; F:GO:0003735; C:GO:0015935	P:translation; F:structural constituent of ribosome; C:small ribosomal subunit
g1189.t1	KAJ3567172.1hypothetical protein NP233_g6537	3	9.01e-174	91.83	15	P:GO:0000372; P:GO:0006437; P:GO:0019752; P:GO:0033120; P:GO:0034337; P:GO:0070184; F:GO:0003723; F:GO:0004831; F:GO:0005524; F:GO:0042802; C:GO:0005759; C:GO:0005829	P:Group I intron splicing; P:tyrosyl-tRNA aminoacylation; P:carboxylic acid metabolic process; P:positive regulation of RNA splicing; P:RNA folding; P:mitochondrial tyrosyl-tRNA aminoacylation; F:RNA binding; F:tyrosine-tRNA ligase activity; F:ATP binding; F:identical protein binding; C:mitochondrial matrix; C:cytosol	EC:6.1.1.1	tyrosine--tRNA ligase
g1190.t1	KAJ3567173.1hypothetical protein NP233_g6538	3	0	83.22	1	C:GO:0016020	C:membrane
g1191.t1	KAF5355114.1hypothetical protein D9756_005319	3	0	86.59	16	P:GO:0000463; P:GO:0000466; P:GO:0010501; P:GO:1902626; F:GO:0003723; F:GO:0003724; F:GO:0005524; F:GO:0016787; F:GO:0016887; C:GO:0005634; C:GO:0005730; C:GO:0005737; C:GO:0030687	P:maturation of LSU-rRNA from tricistronic rRNA transcript (SSU-rRNA, 5.8S rRNA, LSU-rRNA); P:maturation of 5.8S rRNA from tricistronic rRNA transcript (SSU-rRNA, 5.8S rRNA, LSU-rRNA); P:RNA secondary structure unwinding; P:assembly of large subunit precursor of preribosome; F:RNA binding; F:RNA helicase activity; F:ATP binding; F:hydrolase activity; F:ATP hydrolysis activity; C:nucleus; C:nucleo…	EC:3.6.4.13; EC:3.6.1.15	RNA helicase; nucleoside-triphosphate phosphatase
g1192.t1	KAJ3568673.1hypothetical protein NP233_g5555	2	4.1e-29	67.27
g1193.t1	KAF5360975.1hypothetical protein D9756_004486	3	4.17e-40	58.88	3	F:GO:0003676; F:GO:0008270; C:GO:0005634	F:nucleic acid binding; F:zinc ion binding; C:nucleus
g1194.t1	KAJ3560359.1hypothetical protein NP233_g10892	3	9.32e-47	67.17
g1195.t1	KAJ3567855.1hypothetical protein NP233_g6086	3	0	81.11
g1196.t1	KAF5359126.1hypothetical protein D9756_003292	3	0	70.39				EC:2.7.1.46	L-arabinokinase
g1197.t1	KXN91653.1Actin-related protein 10	3	8.36e-241	81	1	C:GO:0016020	C:membrane
g1198.t1	KXN91652.1Peroxisomal adenine nucleotide transporter 1	3	2.22e-195	87.79	3	P:GO:0055085; C:GO:0005739; C:GO:0016020	P:transmembrane transport; C:mitochondrion; C:membrane
g1199.t1	KAF5359587.1hypothetical protein D9756_003290	3	3e-135	76.87	1	F:GO:0008757	F:S-adenosylmethionine-dependent methyltransferase activity
g1201.t1	KAF5364243.1hypothetical protein D9756_000820	3	2.23e-221	94.46	8	P:GO:0009085; F:GO:0000287; F:GO:0016616; F:GO:0047046; F:GO:0051287; C:GO:0005739	P:lysine biosynthetic process; F:magnesium ion binding; F:oxidoreductase activity, acting on the CH-OH group of donors, NAD or NADP as acceptor; F:homoisocitrate dehydrogenase activity; F:NAD binding; C:mitochondrion	EC:1.1.1.87	homoisocitrate dehydrogenase
g1203.t1	KAF7776763.1hypothetical protein Agabi119p4_5156	3	7.26e-69	86.05	1	F:GO:0097159	F:organic cyclic compound binding
g1204.t1	KAF5354660.1hypothetical protein D9756_005333	3	3.78e-174	85.3	11	P:GO:0006805; P:GO:0032259; P:GO:0035246; P:GO:0042254; P:GO:0046498; P:GO:0046500; F:GO:0008757; F:GO:0019702; C:GO:0005622; C:GO:0005634; C:GO:0005737	P:xenobiotic metabolic process; P:methylation; P:peptidyl-arginine N-methylation; P:ribosome biogenesis; P:S-adenosylhomocysteine metabolic process; P:S-adenosylmethionine metabolic process; F:S-adenosylmethionine-dependent methyltransferase activity; F:protein arginine N5-methyltransferase activity; C:intracellular anatomical structure; C:nucleus; C:cytoplasm	EC:2.1.1.322	type IV protein arginine methyltransferase
g1205.t1	KAF5355135.1hypothetical protein D9756_005335	3	0	81.51	23	P:GO:0000122; P:GO:0000183; P:GO:0000729; P:GO:0006338; P:GO:0022607; P:GO:0030466; P:GO:0031509; P:GO:0034728; P:GO:0043954; P:GO:0071103; F:GO:0003677; F:GO:0003682; F:GO:0005524; F:GO:0016787; F:GO:0016887; F:GO:0140658; C:GO:0000775; C:GO:0005634; C:GO:0005739; C:GO:0031934	P:negative regulation of transcription by RNA polymerase II; P:rDNA heterochromatin formation; P:DNA double-strand break processing; P:chromatin remodeling; P:cellular component assembly; P:silent mating-type cassette heterochromatin formation; P:subtelomeric heterochromatin formation; P:nucleosome organization; P:cellular component maintenance; P:DNA conformation change; F:DNA binding; F:chromat…	EC:3.6.1.15	nucleoside-triphosphate phosphatase
g1206.t1	KAF5354850.1hypothetical protein D9756_005329	3	0	84.1	6	P:GO:0006623; P:GO:0015833; P:GO:0045324; F:GO:0008270; C:GO:0033263	P:protein targeting to vacuole; P:peptide transport; P:late endosome to vacuole transport; F:zinc ion binding; C:CORVET complex
g1207.t1	KXN92453.1Threonine dehydratase, mitochondrial	3	0	86.66	10	P:GO:0006567; P:GO:0008652; P:GO:0009097; F:GO:0004794; F:GO:0030170; C:GO:0005739	P:threonine catabolic process; P:amino acid biosynthetic process; P:isoleucine biosynthetic process; F:threonine deaminase activity; F:pyridoxal phosphate binding; C:mitochondrion	EC:4.3.1.19	threonine ammonia-lyase
g1208.t1	KAJ3567167.1hypothetical protein NP233_g6532	3	6.47e-191	85.61
g1209.t1	KAF5360573.1hypothetical protein D9756_005069	3	0	88.89	4	P:GO:0032264; F:GO:0003876	P:IMP salvage; F:AMP deaminase activity	EC:3.5.4.17; EC:3.5.4.6	adenosine-phosphate deaminase; AMP deaminase
g1210.t1	KAJ3564031.1hypothetical protein NP233_g8563	3	4e-160	89.81	8	F:GO:0004497; F:GO:0005506; F:GO:0016705; F:GO:0020037	F:monooxygenase activity; F:iron ion binding; F:oxidoreductase activity, acting on paired donors, with incorporation or reduction of molecular oxygen; F:heme binding	EC:1.14	Acting on paired donors, with incorporation or reduction of molecular oxygen. The oxygen incorporated need not be derived from O2
g1211.t1	KXN83760.1Succinate dehydrogenase [ubiquinone] cytochrome b small subunit, mitochondrial	3	1.36e-103	93.99	22	P:GO:0006099; P:GO:0006101; P:GO:0006121; P:GO:0006805; P:GO:0009167; P:GO:0015833; P:GO:0016310; P:GO:0016999; P:GO:0017038; P:GO:0044743; P:GO:0045039; P:GO:0046034; P:GO:0065002; P:GO:1990542; F:GO:0005515; F:GO:0020037; F:GO:0043495; F:GO:0048039; F:GO:1901363; C:GO:0005743; C:GO:0005749; C:GO:0042721	P:tricarboxylic acid cycle; P:citrate metabolic process; P:mitochondrial electron transport, succinate to ubiquinone; P:xenobiotic metabolic process; P:purine ribonucleoside monophosphate metabolic process; P:peptide transport; P:phosphorylation; P:antibiotic metabolic process; P:protein import; P:protein transmembrane import into intracellular organelle; P:protein insertion into mitochondrial in…
g1212.t1	KAF5360941.1hypothetical protein D9756_005078	3	1.62e-119	58.8
g1213.t1	KAF5347027.1hypothetical protein D9756_011014	3	9.43e-21	57.22	1	F:GO:0003824	F:catalytic activity
g1215.t1	KAJ3557185.1hypothetical protein NP233_g11807	3	0	92.78	22	P:GO:0000032; P:GO:0006515; P:GO:0031324; P:GO:0031505; P:GO:0035269; P:GO:0036178; P:GO:0036244; P:GO:0036503; P:GO:0044011; P:GO:0044038; P:GO:0044248; P:GO:0044419; P:GO:0045861; P:GO:0071218; P:GO:0071466; P:GO:1900101; F:GO:0004169; C:GO:0005789; C:GO:0005886; C:GO:0097582; C:GO:0097586	P:cell wall mannoprotein biosynthetic process; P:protein quality control for misfolded or incompletely synthesized proteins; P:negative regulation of cellular metabolic process; P:fungal-type cell wall organization; P:protein O-linked mannosylation; P:filamentous growth of a population of unicellular organisms in response to neutral pH; P:cellular response to neutral pH; P:ERAD pathway; P:single-…	EC:2.4.1.109	dolichyl-phosphate-mannose--protein mannosyltransferase
g1216.t1	KAF5362562.1hypothetical protein D9756_002373	3	0	79.33	1	F:GO:0005085	F:guanyl-nucleotide exchange factor activity
g1217.t1	XP_006461898.1hypothetical protein AGABI2DRAFT_205902	3	1.64e-295	82.65	26	P:GO:0007265; P:GO:0031098; P:GO:0032147; P:GO:0032488; P:GO:0042981; P:GO:0045745; P:GO:0045930; P:GO:0051494; P:GO:0061161; P:GO:0062038; P:GO:0070507; P:GO:0071902; P:GO:0090028; P:GO:0110020; P:GO:1903472; F:GO:0004674; F:GO:0005524; F:GO:0031267; F:GO:0043539; C:GO:0005876; C:GO:0051286; C:GO:0071521; C:GO:0099568; C:GO:0120105	P:Ras protein signal transduction; P:stress-activated protein kinase signaling cascade; P:activation of protein kinase activity; P:Cdc42 protein signal transduction; P:regulation of apoptotic process; P:positive regulation of G protein-coupled receptor signaling pathway; P:negative regulation of mitotic cell cycle; P:negative regulation of cytoskeleton organization; P:positive regulation of estab…	EC:2.7.11.1	non-specific serine/threonine protein kinase
g1218.t1	KAF5362565.1hypothetical protein D9756_002376	3	0	67.93	18	P:GO:0000723; P:GO:0006302; P:GO:0006325; P:GO:0009987; P:GO:0010557; P:GO:0018105; P:GO:0045739; P:GO:0045931; P:GO:0051446; P:GO:0060249; P:GO:0065008; P:GO:1904291; P:GO:1904514; F:GO:0004674; F:GO:0042162; F:GO:1901363; C:GO:0005634; C:GO:0005739	P:telomere maintenance; P:double-strand break repair; P:chromatin organization; P:cellular process; P:positive regulation of macromolecule biosynthetic process; P:peptidyl-serine phosphorylation; P:positive regulation of DNA repair; P:positive regulation of mitotic cell cycle; P:positive regulation of meiotic cell cycle; P:anatomical structure homeostasis; P:regulation of biological quality; P:po…	EC:2.7.11.1	non-specific serine/threonine protein kinase
g1219.t1	KAF5348782.1hypothetical protein D9756_009847	3	2.45e-49	61.24	4	F:GO:0003676; F:GO:0008270; C:GO:0005634; C:GO:0043227	F:nucleic acid binding; F:zinc ion binding; C:nucleus; C:membrane-bounded organelle
g1220.t1	KAJ3560359.1hypothetical protein NP233_g10892	3	5.24e-161	89.18	3	F:GO:0003676; F:GO:0008270; C:GO:0005634	F:nucleic acid binding; F:zinc ion binding; C:nucleus
g1221.t1	KAJ3560474.1hypothetical protein NP233_g10815	3	1.6e-148	72.88	1	F:GO:0003676	F:nucleic acid binding
g1224.t1	KAF5354227.1hypothetical protein D9756_007006	3	1.04e-257	74.64
g1225.t1	KAJ3552687.1hypothetical protein NP233_g12820	3	4.61e-71	78.66	2	P:GO:0006355; F:GO:0005488	P:regulation of DNA-templated transcription; F:binding
g1226.t1	KAF5353971.1hypothetical protein D9756_007010	3	0	90	14	P:GO:0015914; P:GO:0034204; F:GO:0000287; F:GO:0005524; F:GO:0016887; F:GO:0090555; C:GO:0016020	P:phospholipid transport; P:lipid translocation; F:magnesium ion binding; F:ATP binding; F:ATP hydrolysis activity; F:phosphatidylethanolamine flippase activity; C:membrane	EC:7.6.2.1; EC:3.6.1.15	P-type phospholipid transporter; nucleoside-triphosphate phosphatase
g1227.t1	KXN88378.1Aldehyde dehydrogenase	3	4.38e-250	80.23	1	F:GO:0016491	F:oxidoreductase activity	EC:1	Oxidoreductases
g1230.t1	KAJ3568440.1hypothetical protein NP233_g5713	3	0	97.53	16	P:GO:0006099; P:GO:0006101; P:GO:0006106; P:GO:0006805; P:GO:0016999; F:GO:0010181; F:GO:0016156; F:GO:0016628; F:GO:0020037; F:GO:0046872; F:GO:0140907	P:tricarboxylic acid cycle; P:citrate metabolic process; P:fumarate metabolic process; P:xenobiotic metabolic process; P:antibiotic metabolic process; F:FMN binding; F:fumarate reductase (NADH) activity; F:oxidoreductase activity, acting on the CH-CH group of donors, NAD or NADP as acceptor; F:heme binding; F:metal ion binding; F:flavin-dependent halogenase activity	EC:1.14; EC:1.3.1.6	Acting on paired donors, with incorporation or reduction of molecular oxygen. The oxygen incorporated need not be derived from O2; fumarate reductase (NADH)
g1231.t1	KAF5351834.1hypothetical protein D9756_007481	3	7.79e-275	84.13	8	P:GO:0006508; F:GO:0046872; F:GO:0070573; C:GO:0016020	P:proteolysis; F:metal ion binding; F:metallodipeptidase activity; C:membrane	EC:3.4.13	Acting on peptide bonds (peptidases)
g1234.t1	KAF5363546.1hypothetical protein D9756_000847	3	6.65e-108	87.73
g1235.t1	KAF5363851.1hypothetical protein D9756_000843	3	0	86.93	7	P:GO:0006665; P:GO:0015918; F:GO:0046624; C:GO:0000329; C:GO:0005783; C:GO:0016020	P:sphingolipid metabolic process; P:sterol transport; F:sphingolipid transporter activity; C:fungal-type vacuole membrane; C:endoplasmic reticulum; C:membrane
g1236.t1	KXN87899.1hypothetical protein AN958_07908	3	1.21e-108	91.67	7	P:GO:0006624; P:GO:0006886; P:GO:0015833; P:GO:0045047; P:GO:0045048; C:GO:0005789	P:vacuolar protein processing; P:intracellular protein transport; P:peptide transport; P:protein targeting to ER; P:protein insertion into ER membrane; C:endoplasmic reticulum membrane
g1237.t1	KAF5363444.1hypothetical protein D9756_000838	3	2.64e-221	85.49
g1238.t1	XP_006459901.1hypothetical protein AGABI2DRAFT_219318	3	4.12e-43	69.61	3	F:GO:0046982; C:GO:0005634; C:GO:0005669	F:protein heterodimerization activity; C:nucleus; C:transcription factor TFIID complex
g1239.t1	KAF5363848.1hypothetical protein D9756_000840	3	1.07e-104	85.39	13	P:GO:0006805; P:GO:0009231; P:GO:0009398; P:GO:0016310; F:GO:0005524; F:GO:0008270; F:GO:0008531; C:GO:0005743	P:xenobiotic metabolic process; P:riboflavin biosynthetic process; P:FMN biosynthetic process; P:phosphorylation; F:ATP binding; F:zinc ion binding; F:riboflavin kinase activity; C:mitochondrial inner membrane	EC:2.7.1.26	riboflavin kinase
g1240.t1	KAF5363849.1hypothetical protein D9756_000841	3	5.23e-69	69.11	8	P:GO:0000028; P:GO:0000462; P:GO:0032543; F:GO:0003735; F:GO:0048027; F:GO:0070181; F:GO:1901363; C:GO:0005763	P:ribosomal small subunit assembly; P:maturation of SSU-rRNA from tricistronic rRNA transcript (SSU-rRNA, 5.8S rRNA, LSU-rRNA); P:mitochondrial translation; F:structural constituent of ribosome; F:mRNA 5'-UTR binding; F:small ribosomal subunit rRNA binding; F:heterocyclic compound binding; C:mitochondrial small ribosomal subunit
g1241.t1	KAJ3563393.1hypothetical protein NP233_g8969	3	9.25e-69	81.78	2	F:GO:0003676; F:GO:0003723	F:nucleic acid binding; F:RNA binding
g1242.t1	KAJ3575066.1hypothetical protein NP233_g1356	3	4.28e-94	78.4
g1244.t1	KAF5358535.1hypothetical protein D9756_001949	3	0	83.73	12	P:GO:0006396; P:GO:0010468; F:GO:0003723; F:GO:0004386; F:GO:0004525; F:GO:0005524	P:RNA processing; P:regulation of gene expression; F:RNA binding; F:helicase activity; F:ribonuclease III activity; F:ATP binding	EC:3.1.30; EC:3.1.26.3	Acting on ester bonds; ribonuclease III
[truncated: 4,726 more rows]

## Sheet: S5
Table S5: Functional annotation of the predicted genes using EggNog Mapper to complement the functional annotation in terms of COG, KOG and ENOG
Type	Query ID		Gene Name	EggNOG Description	EggNOG Protein	E-Value	Bit-Score	Best Tax-Level	Taxa Scope	EC Codes	#GO	GOs	GO Names	KEGG KO	KEGG Pathway	KEGG Module	KEGG Reaction	KEGG RCLASS	KEGG TC	Brite	CAZy	BiGG	Matching OGs	COG Categories
[truncated: 5,836 more rows]
